# Supplementary material for: Modelling nitrogen management in hybrid rice for coastal ecosystem of West Bengal, India
Source: PeerJ. 2023 Feb 15;11:e14903. doi: 10.7717/peerj.14903 (PMC9938656; doi:10.7717/peerj.14903)
Supplement: Supplemental Information 2 [file peerj-11-14903-s002.xlsx]

## Sheet: APSIM Output 
											C:\Users\SAR081\Google Drive\PhD Works\PhD Research in Australia\APSIM Simulation\Simulation_7.5\T1_1DOS_MU_Rice-GP.out
file list table:	add'l headers:
Output files	Land_type	variety	N_Dose	Tretment				Land_type	variety	N_Dose	Tretment	Date	year	crop_name	tot_irrig	wagt	wrr	watertable	irrigation	rain	dvs	sf1	sf2	rnstrs	lestrs	stage	swdef_photo	swdef_expan	temp_stress_photo	wlv	drain	flow_water(1)	flow_water(2)	flow_water(3)	flow_water(4)	flow_water(5)	flow_water(6)	flow_water(7)	flow_water(8)	flow_water(9)	flow_water(10)	flow_water(11)	flow_water(12)	pond	flow_cl(1)	flow_cl(2)	flow_cl(3)	flow_cl(4)	flow_cl(5)
C:\Users\sukam\Google Drive\APSIM Reserchs\Rice Kakdwip BCKV\APSIM Anslysis\C-V\N0.out	Medium_Lowland	PAN2423	0	1				Medium_Lowland	PAN2423	0	1	2016-06-01	2016	?	0	0	0	?	0	9.92	0	1	1	1	1	?	?	?	?	0	0.001	7.705	8.21	6.5	4.22	2.11	0.844	0.338	0.101	0.03	0.009	0.003	0.001	0	91.8	277.4	300.9	221	115.2
C:\Users\sukam\Google Drive\APSIM Reserchs\Rice Kakdwip BCKV\APSIM Anslysis\C-V\N40.out	Medium_Lowland	PAN2423	40	2				Medium_Lowland	PAN2423	0	1	2016-06-02	2016	?	0	0	0	?	0	6.46	0	1	1	1	1	?	?	?	?	0	0.005	3.99	3.99	3.99	3.99	2.5	1.506	0.805	0.312	0.115	0.041	0.014	0.005	0	29.9	98.4	165.2	201.2	135.6
C:\Users\sukam\Google Drive\APSIM Reserchs\Rice Kakdwip BCKV\APSIM Anslysis\C-V\N80.out	Medium_Lowland	PAN2423	80	3				Medium_Lowland	PAN2423	0	1	2016-06-03	2016	?	0	0	0	?	0	5.3	0	1	1	1	1	?	?	?	?	0	0.016	2.83	2.83	2.83	2.83	2.5	1.904	1.245	0.592	0.258	0.106	0.042	0.016	0	16.3	55.1	106.6	137.8	134.8
C:\Users\sukam\Google Drive\APSIM Reserchs\Rice Kakdwip BCKV\APSIM Anslysis\C-V\N120.out	Medium_Lowland	PAN2423	120	4				Medium_Lowland	PAN2423	0	1	2016-06-04	2016	?	0	0	0	?	0	5.23	0	1	1	1	1	?	?	?	?	0	0.039	2.76	2.76	2.76	2.76	2.5	2.142	1.604	0.896	0.449	0.209	0.092	0.039	0	14.2	43.1	93.8	129.1	133.7
C:\Users\sukam\Google Drive\APSIM Reserchs\Rice Kakdwip BCKV\APSIM Anslysis\C-V\N160.out	Medium_Lowland	PAN2423	160	5				Medium_Lowland	PAN2423	0	1	2016-06-05	2016	?	0	0	0	?	0	6.79	0	1	1	1	1	?	?	?	?	0	0.078	4.32	4.32	4.32	4.32	3.51	2.689	2.038	1.238	0.686	0.352	0.17	0.078	0	19.1	49.8	123.5	187	184.6
C:\Users\sukam\Google Drive\APSIM Reserchs\Rice Kakdwip BCKV\APSIM Anslysis\C-V\N200.out	Medium_Lowland	PAN2423	200	6				Medium_Lowland	PAN2423	0	1	2016-06-06	2016	?	0	0	0	?	0	8.33	0	1	1	1	1	?	?	?	?	0	0.139	5.948	5.86	5.86	5.86	5.86	3.958	2.806	1.709	0.993	0.544	0.282	0.139	0	17.8	45.4	131	223.9	298.4
								Medium_Lowland	PAN2423	0	1	2016-06-07	2016	?	0	0	0	?	0	5.57	0	1	1	1	1	?	?	?	?	0	0.227	3.356	3.232	3.232	3.232	3.232	3.667	3.15	2.141	1.337	0.782	0.432	0.227	0	6.9	19.4	62.2	114.3	161.2
								Medium_Lowland	PAN2423	0	1	2016-06-08	2016	?	0	0	0	?	0	4.23	0	1	1	1	1	?	?	?	?	0	0.344	1.866	2.077	2.077	2.077	2.5	3.2	3.17	2.45	1.671	1.049	0.617	0.344	0	1.9	10.4	36.1	69.6	122.9
								Medium_Lowland	PAN2423	0	1	2016-06-09	2016	?	0	0	0	?	0	3.43	0	1	1	1	1	?	?	?	?	0	0.49	0.96	0.96	0.96	1.14	2.5	2.92	3.07	2.636	1.961	1.322	0.829	0.49	0	0.4	4.3	15.9	37.2	121.9
								Medium_Lowland	PAN2423	0	1	2016-06-10	2016	?	0	0	0	?	0	2.7	0	1	1	1	1	?	?	?	?	0	0.659	0.343	0.57	0.855	1.14	2.179	2.624	2.892	2.713	2.186	1.582	1.055	0.659	0	-0.4	2.4	13.7	36.4	105.3
								Medium_Lowland	PAN2423	0	1	2016-06-11	2016	?	0	0	0	?	0	2.24	0	1	1	1	1	?	?	?	?	0	0.846	-0.058	0.285	0.855	1.14	1.659	2.238	2.63	2.688	2.337	1.808	1.281	0.846	0	-0.9	1.2	13.5	35.6	79.4
								Medium_Lowland	PAN2423	0	1	2016-06-12	2016	?	0	0	0	?	0	8.4	0	1	1	1	1	?	?	?	?	0	1.04	5.645	5.075	4.22	3.47	2.5	2.343	2.515	2.636	2.427	1.994	1.495	1.04	0	8.8	15.2	51.3	95.4	115.8
								Medium_Lowland	PAN2423	0	1	2016-06-13	2016	?	0	0	0	?	0	21.37	0	1	1	1	1	?	?	?	?	0	1.24	19.53	18.72	18.72	18.72	16.349	7.863	4.655	3.242	2.671	2.197	1.705	1.24	0	10.1	22.5	109.3	309.6	608.5
								Medium_Lowland	PAN2423	0	1	2016-06-14	2016	?	0	0	0	?	0	10.75	0	1	1	1	1	?	?	?	?	0	1.35	8.535	9.346	9.346	9.346	9.346	9.346	6.531	4.05	3.085	2.463	1.933	1.35	0	1.3	6.3	35	114.1	307.6
								Medium_Lowland	PAN2423	0	1	2016-06-15	2016	?	0	0	0	?	0	7.46	0	1	1	1	1	?	?	?	?	0	1.35	4.99	4.99	4.99	4.99	4.99	4.99	5.915	4.05	3.374	2.737	2.174	1.35	0	0.6	2.2	14.3	50.9	152.9
								Medium_Lowland	PAN2423	0	1	2016-06-16	2016	?	0	0	0	?	0	2.91	0	1	1	1	1	?	?	?	?	0	2.218	0.483	0.57	0.855	1.14	2.5	4.8	5.469	4.05	3.577	2.989	2.418	2.218	0	-0.1	0.2	2.4	11.3	75.3
								Medium_Lowland	PAN2423	0	1	2016-06-17	2016	?	0	0	0	?	0	9.94	0	1	1	1	1	?	?	?	?	0	2.682	7.427	7.34	7.055	6.77	5.41	4.8	5.201	5.029	4.013	3.296	2.682	2.682	0	0.8	1.9	13.2	51.6	146.7
								Medium_Lowland	PAN2423	0	1	2016-06-18	2016	?	0	0	0	?	0	6.62	0	1	1	1	1	?	?	?	?	0	2.934	4.15	4.15	4.15	4.15	4.15	4.8	5.041	5.041	4.05	3.522	2.934	2.934	0	0.3	0.8	6.2	26.9	105.3
								Medium_Lowland	PAN2423	0	1	2016-06-19	2016	?	0	0	0	?	0	4.81	0	1	1	1	1	?	?	?	?	0	3.158	2.34	2.34	2.34	2.34	2.5	4.8	4.944	4.944	4.05	3.68	3.158	3.158	0	0.1	0.4	3	13.8	61
								Medium_Lowland	PAN2423	0	1	2016-06-20	2016	?	0	0	0	?	0	1.92	0	1	1	1	1	?	?	?	?	0	3.348	-0.268	0.295	0.855	1.14	2.5	3.944	4.544	4.544	4.05	3.791	3.348	3.348	0	-0.1	0	1.1	6.5	59.9
								Medium_Lowland	PAN2423	0	1	2016-06-21	2016	?	0	0	0	?	0	0.79	0	1	1	1	1	?	?	?	?	0	3.504	-0.824	-1.359	0.575	1.14	2.31	3.29	4.043	4.05	4.05	3.869	3.504	3.504	0	-0.3	-1.7	0.7	6.3	54.2
								Medium_Lowland	PAN2423	0	1	2016-06-22	2016	?	0	0	0	?	0	0.58	0	1	1	1	1	?	?	?	?	0	3.63	-1.087	-0.652	-1.115	0.715	1.512	2.579	3.457	4.05	4.05	3.923	3.63	3.63	0	-0.5	-1.2	-6.2	4	35.1
								Medium_Lowland	PAN2423	0	1	2016-06-23	2016	?	0	0	0	?	0	2.19	0	1	1	1	1	?	?	?	?	0	3.729	-0.404	-0.689	-0.393	-0.743	0.756	1.85	2.814	4.05	4.05	3.961	3.729	3.729	0	-0.5	-1.3	-2.6	-17.2	17.5
								Medium_Lowland	PAN2423	0	1	2016-06-24	2016	?	0	0	0	?	0	2.03	0	1	1	1	1	?	?	?	?	0	3.807	-0.508	-0.462	-0.583	-0.414	0.007	1.113	2.134	4.05	4.05	3.988	3.807	3.807	0	-0.5	-1.1	-4	-9.6	0.2
								Medium_Lowland	PAN2423	0	1	2016-06-25	2016	?	0	0	0	?	0	0.56	0	1	1	1	1	?	?	?	?	0	3.867	-1.016	-0.842	-0.659	-0.471	-0.32	0.668	1.547	3.389	4.05	4.007	3.867	3.867	0	-0.9	-2.1	-4.9	-11.1	-13.7
								Medium_Lowland	PAN2423	0	1	2016-06-26	2016	?	0	0	0	?	0	6.18	0	1	1	1	1	?	?	?	?	0	3.913	3.09	2.692	0.855	0.519	0	0.273	1.037	2.683	4.05	4.02	3.913	3.913	0	0.8	1.7	1.7	3.6	0
								Medium_Lowland	PAN2423	0	1	2016-06-27	2016	?	0	0	0	?	0	8.83	0	1	1	1	1	?	?	?	?	0	3.904	6.36	6.36	5.808	3.456	1.709	0.847	0.961	2.167	3.564	3.883	3.904	3.904	0	1.1	2.6	8.6	19	37.1
								Medium_Lowland	PAN2423	0	1	2016-06-28	2016	?	0	0	0	?	30	8.51	0	1	1	1	1	?	?	?	?	0	3.857	26.021	26.021	26.021	26.021	22.73	12	5.377	3.13	3.434	3.748	3.857	3.857	4.987	1.2	3.4	15.5	68.2	326.9
								Medium_Lowland	PAN2423	0	1	2016-06-29	2016	?	0	0	0	?	0	4.34	0	1	1	1	1	?	?	?	?	0	3.811	6.857	6.857	6.857	6.857	6.857	6.857	5.969	3.981	3.598	3.703	3.811	3.811	0	0.2	0.5	2.9	13.9	87.4
								Medium_Lowland	PAN2423	0	1	2016-06-30	2016	?	0	0	0	?	0	3.28	0	1	1	1	1	?	?	?	?	0	3.781	0.81	0.81	0.855	1.14	2.5	4.8	5.501	4.05	3.734	3.712	3.781	3.781	0	0	0.1	0.3	2.2	31.2
								Medium_Lowland	PAN2423	0	1	2016-07-01	2016	?	0	0	0	?	0	9.47	0	1	1	1	1	?	?	?	?	0	3.771	7	7	6.955	6.67	5.31	4.8	5.221	4.05	3.829	3.747	3.771	3.771	0	0.1	0.3	2	9.9	58.5
								Medium_Lowland	PAN2423	0	1	2016-07-02	2016	rice	0	3.8	0	?	0	28.72	0.015	1	1	1	1	?	?	?	?	2.3	3.791	13.79	13.79	13.79	13.79	13.79	12	6.96	5.372	4.05	3.838	3.791	3.791	9.923	0.1	0.3	2.1	12.6	119.3
								Medium_Lowland	PAN2423	0	1	2016-07-03	2016	rice	0	6.5	0	?	0	61.07	0.031	1	1	1	1	?	?	?	?	3.9	3.84	13.279	12	12	12	12	12	7.471	7.471	4.227	3.955	3.84	3.84	55.588	0.1	0.1	1	7	83.4
								Medium_Lowland	PAN2423	0	1	2016-07-04	2016	rice	0	9.3	0	?	0	21.97	0.046	1	1	1	1	?	?	?	?	5.6	3.903	8.193	8	8	8	8	8	8	8	8	4.05	3.903	3.903	67.88	0	0	0.4	3.4	47.7
								Medium_Lowland	PAN2423	0	1	2016-07-05	2016	rice	0	16.5	0	?	0	16.66	0.061	1	1	1	1	?	?	?	?	9.9	4.05	6.969	8	8	8	8	8	8	8	8	7.678	4.05	4.05	73.988	0	0	0.3	2.4	40.9
								Medium_Lowland	PAN2423	0	1	2016-07-06	2016	rice	0	26.6	0	?	0	6.15	0.077	1	1	1	1	?	?	?	?	15.9	7.235	7.862	8	8	8	8	8	8	8	8	8	7.235	7.235	68.314	0	0	0.2	1.8	35
								Medium_Lowland	PAN2423	0	1	2016-07-07	2016	rice	0	37.1	0	?	0	5.84	0.092	1	1	1	1	?	?	?	?	22.3	8	8.446	8	8	8	8	8	8	8	8	8	8	8	62.674	0	0	0.1	1.3	29.9
								Medium_Lowland	PAN2423	0	1	2016-07-08	2016	rice	0	57	0	?	0	9.53	0.107	1	1	1	1	?	?	?	?	34.2	8	7.251	8	8	8	8	8	8	8	8	8	8	8	59.937	0	0	0.1	0.9	25.5
								Medium_Lowland	PAN2423	0	1	2016-07-09	2016	rice	0	79.8	0	?	0	17.37	0.122	1	1	1	1	?	?	?	?	47.9	8	8.24	8	8	8	8	8	8	8	8	8	8	8	64.727	0	0	0.1	0.6	21.8
								Medium_Lowland	PAN2423	0	1	2016-07-10	2016	rice	0	113.3	0	?	0	4.58	0.137	1	1	1	1	?	?	?	?	68	8	7.76	8	8	8	8	8	8	8	8	8	8	8	56.451	0	0	0	0.5	18.6
								Medium_Lowland	PAN2423	0	1	2016-07-11	2016	rice	0	150.2	0	?	0	15.79	0.152	1	1	1	1	?	?	?	?	90.1	8	8.378	8	8	8	8	8	8	8	8	8	8	8	59.868	0	0	0	0.3	15.8
								Medium_Lowland	PAN2423	0	1	2016-07-12	2016	rice	0	184.4	0	?	0	7.89	0.167	1	1	1	1	?	?	?	?	110.6	8	8.766	8	8	8	8	8	8	8	8	8	8	8	56.786	0	0	0	0.2	13.4
								Medium_Lowland	PAN2423	0	1	2016-07-13	2016	rice	0	245.8	0	?	0	4.32	0.182	1	1	1	1	?	?	?	?	147.5	8	7.291	8	8	8	8	8	8	8	8	8	8	8	50.22	0	0	0	0.2	11.4
								Medium_Lowland	PAN2423	0	1	2016-07-14	2016	rice	0	284.8	0	?	0	8.36	0.197	1	1	1	1	?	?	?	?	170.9	8	8.577	8	8	8	8	8	8	8	8	8	8	8	47.561	0	0	0	0.1	9.7
								Medium_Lowland	PAN2423	0	1	2016-07-15	2016	rice	0	310.9	0	?	0	13.96	0.213	1	1	1	1	?	?	?	?	186.5	8	8.632	8	8	8	8	8	8	8	8	8	8	8	51.779	0	0	0	0.1	8.3
								Medium_Lowland	PAN2423	0	1	2016-07-16	2016	rice	0	348.5	0	?	0	21.22	0.228	1	1	1	1	?	?	?	?	209.1	8	7.471	8	8	8	8	8	8	8	8	8	8	8	63.361	0	0	0	0.1	7
								Medium_Lowland	PAN2423	0	1	2016-07-17	2016	rice	0	406.1	0	?	0	10.85	0.243	1	1	1	1	?	?	?	?	243.7	8	7.588	8	8	8	8	8	8	8	8	8	8	8	63.602	0	0	0	0	6
								Medium_Lowland	PAN2423	0	1	2016-07-18	2016	rice	0	455.5	0	?	0	5.77	0.258	1	1	1	1	?	?	?	?	273.3	8	8.093	8	8	8	8	8	8	8	8	8	8	8	58.445	0	0	0	0	5.1
								Medium_Lowland	PAN2423	0	1	2016-07-19	2016	rice	0	512.3	0	?	0	10.86	0.273	1	1	1	1	?	?	?	?	307.4	8	7.961	8	8	8	8	8	8	8	8	8	8	8	58.43	0	0	0	0	4.3
								Medium_Lowland	PAN2423	0	1	2016-07-20	2016	rice	0	577.2	0	?	0	3.68	0.288	1	1	1	1	?	?	?	?	346.3	8	7.796	8	8	8	8	8	8	8	8	8	8	8	50.992	0	0	0	0	3.7
								Medium_Lowland	PAN2423	0	1	2016-07-21	2016	rice	0	636.6	0	?	0	4.91	0.303	1	1	1	1	?	?	?	?	381.9	8	8.459	8	8	8	8	8	8	8	8	8	8	8	45.039	0	0	0	0	3.1
								Medium_Lowland	PAN2423	0	1	2016-07-22	2016	rice	0	83.5	0	?	0	13.34	0.319	1	1	1	1	?	?	?	?	50.1	8	8.363	8	8	8	8	8	8	8	8	8	8	8	48.337	0	0	0	0	2.6
								Medium_Lowland	PAN2423	0	1	2016-07-23	2016	rice	0	85.8	0	?	0	28.78	0.319	1	1	1	0.953	?	?	?	?	51.5	8	8.105	8	8	8	8	8	8	8	8	8	8	8	67.544	0	0	0	0	2.2
								Medium_Lowland	PAN2423	0	1	2016-07-24	2016	rice	0	91.3	0	?	0	8.56	0.319	1	1	1	0.934	?	?	?	?	54.8	8	7.414	8.039	8	8	8	8	8	8	8	8	8	8	65.907	0	0	0	0	1.9
								Medium_Lowland	PAN2423	0	1	2016-07-25	2016	rice	0	93.3	0	?	0	46.34	0.319	1	1	1	0.969	?	?	?	?	56	8	8.941	8.084	8.021	8	8	8	8	8	8	8	8	8	102.172	0	0	0	0	1.6
								Medium_Lowland	PAN2423	0	1	2016-07-26	2016	rice	0	98	0	?	0	22.19	0.319	1	1	1	0.969	?	?	?	?	58.8	8	7.507	8.036	8.014	8	8	8	8	8	8	8	8	8	114.648	0	0	0	0	1.4
								Medium_Lowland	PAN2423	0	1	2016-07-27	2016	rice	0	104.9	0	?	0	10.63	0.319	1	1	1	0.902	?	?	?	?	62.9	8	7.365	8.079	8.039	8	8	8	8	8	8	8	8	8	114.119	0	0	0	0	1.2
								Medium_Lowland	PAN2423	0	1	2016-07-28	2016	rice	0	112.8	0	?	0	0.6	0.319	1	1	1	0.881	?	?	?	?	67.7	8	7.822	8.143	8.082	8	8	8	8	8	8	8	8	8	102.004	0	0	0	0	1
								Medium_Lowland	PAN2423	0	1	2016-07-29	2016	rice	0	122.1	0	?	0	8.19	0.319	1	1	1	0.9	?	?	?	?	73.3	8	8.365	8.199	8.124	8.025	8	8	8	8	8	8	8	8	97.155	0	0	0	0	0.8
								Medium_Lowland	PAN2423	0	1	2016-07-30	2016	rice	0	130.3	0	?	0	8.02	0.319	1	1	1	0.966	?	?	?	?	78.2	8	9.004	8.222	8.148	8.049	8	8	8	8	8	8	8	8	93.221	0	0	0	0	0.7
								Medium_Lowland	PAN2423	0	1	2016-07-31	2016	rice	0	142.7	0	?	0	13.05	0.333	1	1	1	0.937	?	?	?	?	85.6	8	7.805	8.165	8.116	8.05	8	8	8	8	8	8	8	8	94.908	0	0	0	0	0.6
								Medium_Lowland	PAN2423	0	1	2016-08-01	2016	rice	0	153	0	?	0	30.95	0.348	1	1	1	0.981	?	?	?	?	91.8	8	9.07	8.273	8.198	8.099	8	8	8	8	8	8	8	8	114.718	0	0	0	0	0.5
								Medium_Lowland	PAN2423	0	1	2016-08-02	2016	rice	0	171.9	0	?	0	24.09	0.364	1	1	1	0.959	?	?	?	?	103.2	8	7.685	8.193	8.144	8.08	8	8	8	8	8	8	8	8	128.01	0	0	0	0	0.4
								Medium_Lowland	PAN2423	0	1	2016-08-03	2016	rice	0	200.4	0	?	0	15.7	0.379	1	1	1	0.937	?	?	?	?	120.3	8	8.018	8.372	8.286	8.172	8	8	8	8	8	8	8	8	131.616	0	0	0	0	0.4
								Medium_Lowland	PAN2423	0	1	2016-08-04	2016	rice	0	235.8	0	?	0	17.78	0.394	1	1	1	0.943	?	?	?	?	141.5	8	8.761	8.626	8.492	8.313	8	8	8	8	8	8	8	8	136.528	0	0	0	0	0.3
								Medium_Lowland	PAN2423	0	1	2016-08-05	2016	rice	0	263	0	?	0	19.24	0.409	1	1	1	0.985	?	?	?	?	157.8	8	9.736	8.75	8.6	8.4	8	8	8	8	8	8	8	8	143.819	0	0	0	0	0.3
								Medium_Lowland	PAN2423	0	1	2016-08-06	2016	rice	0	286	0	?	0	16.8	0.426	1	1	1	0.986	?	?	?	?	171.6	8	8.883	8.474	8.385	8.267	8	8	8	8	8	8	8	8	150.348	0	0	0	0	0.2
								Medium_Lowland	PAN2423	0	1	2016-08-07	2016	rice	0	310.5	0	?	0	22.95	0.443	1	1	1	0.987	?	?	?	?	186.3	8	8.546	8.39	8.322	8.23	8	8	8	8	8	8	8	8	163.597	0	0	0	0	0.2
								Medium_Lowland	PAN2423	0	1	2016-08-08	2016	rice	0	378.5	0	?	0	26.02	0.46	1	1	1	0.978	?	?	?	?	227.1	8	7.612	8.402	8.335	8.246	8.022	8	8	8	8	8	8	8	179.181	0	0	0	0	0.2
								Medium_Lowland	PAN2423	0	1	2016-08-09	2016	rice	0	450.1	0	?	0	26.03	0.477	1	1	0.401	0.988	?	?	?	?	270	8	9.682	9.241	9.045	8.784	8.131	8	8	8	8	8	8	8	193.276	0	0	0	0	0.1
								Medium_Lowland	PAN2423	0	1	2016-08-10	2016	rice	0	467.3	0	?	0	64.9	0.493	1	1	0.279	1	?	?	?	?	280.4	8	9.828	9.185	9.007	8.77	8.178	8	8	8	8	8	8	8	247.48	0	0	0	0	0.1
								Medium_Lowland	PAN2423	0	1	2016-08-11	2016	rice	0	551.1	0	?	0	18.08	0.51	1	1	0	0.978	?	?	?	?	330.7	8	7.461	8.316	8.271	8.211	8.06	8	8	8	8	8	8	8	255.504	0	0	0	0	0.1
								Medium_Lowland	PAN2423	0	1	2016-08-12	2016	rice	0	656.7	0	?	0	11.77	0.527	1	1	0	0.967	?	?	?	?	392.8	8	9.511	9.62	9.399	9.104	8.368	8	8	8	8	8	8	8	254.263	0	0	0	0	0.1
								Medium_Lowland	PAN2423	0	1	2016-08-13	2016	rice	0	776.1	0	?	0	2.7	0.543	1	1	0	0.956	?	?	?	?	460.6	8	10.04	10.222	9.932	9.546	8.58	8	8	8	8	8	8	8	242.458	0	0	0	0	0.1
								Medium_Lowland	PAN2423	0	1	2016-08-14	2016	rice	0	904.3	0	?	0	6.01	0.56	1	1	0	0.958	?	?	?	?	530.8	8	11.328	11.048	10.667	10.159	8.889	8	8	8	8	8	8	8	232.521	0	0	0	0	0.1
								Medium_Lowland	PAN2423	0	1	2016-08-15	2016	rice	0	1038.4	0	?	0	16.46	0.577	1	1	0	0.966	?	?	?	?	601.6	8	11.831	11.369	10.965	10.426	9.078	8	8	8	8	8	8	8	233.016	0	0	0	0	0.1
								Medium_Lowland	PAN2423	0	1	2016-08-16	2016	rice	0	1177.4	0	?	0	7.59	0.594	1	1	0	0.972	?	?	?	?	672	8	11.808	11.39	10.999	10.477	9.173	8	8	8	8	8	8	8	225.156	0	0	0	0	0
								Medium_Lowland	PAN2423	0	1	2016-08-17	2016	rice	0	1270.5	0	?	0	28.62	0.611	1	1	0	0.991	?	?	?	?	717.3	8	12.7	11.501	11.112	10.593	9.297	8	8	8	8	8	8	8	239.396	0	0	0	0	0
								Medium_Lowland	PAN2423	0	1	2016-08-18	2016	rice	0	1412.1	0	?	0	16.36	0.628	1	1	0	0.988	?	?	?	?	783.4	8	9.404	9.817	9.622	9.362	8.714	8	8	8	8	8	8	8	243.657	0	0	0	0	0
								Medium_Lowland	PAN2423	0	1	2016-08-19	2016	rice	0	1557	0	?	0	4.1	0.645	1	1	0	0.991	?	?	?	?	848.1	8	11.684	11.35	11.003	10.541	9.386	8	8	8	8	8	8	8	233.534	0	0	0	0	0
								Medium_Lowland	PAN2423	0	1	2016-08-20	2016	rice	0	1725.6	0	?	0	3.55	0.661	1	1	0	0.978	?	?	?	?	920	8	11.147	11.339	11.005	10.56	9.447	8	8	8	8	8	8	8	222.572	0	0	0	0	0
								Medium_Lowland	PAN2423	0	1	2016-08-21	2016	rice	0	1820.3	0	?	0	77.37	0.68	1	1	0	0.992	?	?	?	?	958.5	8	14.142	12.777	12.315	11.699	10.158	8	8	8	8	8	8	8	284.52	0	0	0	0	0
								Medium_Lowland	PAN2423	0	1	2016-08-22	2016	rice	0	1954.1	0	?	0	48.45	0.7	1	1	0	0.992	?	?	?	?	1009.8	8	9.636	9.742	9.578	9.361	8.816	8	8	8	8	8	8	8	299.215	0	0	0	0	0
								Medium_Lowland	PAN2423	0	1	2016-08-23	2016	rice	0	2143.7	0	?	0	3.36	0.719	1	1	0	0.982	?	?	?	?	1078.1	8	9.922	10.531	10.301	9.994	9.227	8	8	8	8	8	8	8	289.482	0	0	0	0	0
								Medium_Lowland	PAN2423	0	1	2016-08-24	2016	rice	0	2335.9	0	?	0	3.21	0.739	1	1	0	0.99	?	?	?	?	1142.8	8	13.731	13.179	12.722	12.112	10.589	8	8	8	8	8	8	8	276.209	0	0	0	0	0
								Medium_Lowland	PAN2423	0	1	2016-08-25	2016	rice	0	2509.1	0	?	0	4.03	0.758	1	1	0	0.993	?	?	?	?	1197.1	8	13.084	12.558	12.167	11.646	10.344	8	8	8	8	8	8	8	264.957	0	0	0	0	0
								Medium_Lowland	PAN2423	0	1	2016-08-26	2016	rice	0	2711.5	0	?	0	5.2	0.778	1	1	0	0.989	?	?	?	?	1255.9	8	11.648	11.774	11.46	11.041	9.992	8	8	8	8	8	8	8	255.665	0	0	0	0	0
								Medium_Lowland	PAN2423	0	1	2016-08-27	2016	rice	0	2913.2	0	?	0	2.49	0.798	1	1	0	0.984	?	?	?	?	1309.7	8	13.275	13.147	12.729	12.173	10.782	8	8	8	8	8	8	8	241.701	0	0	0	0	0
								Medium_Lowland	PAN2423	0	1	2016-08-28	2016	rice	0	3110.8	0	?	0	0.36	0.818	1	1	0	0.993	?	?	?	?	1357.7	8	14.553	13.872	13.396	12.761	11.174	8	8	8	8	8	8	8	225.037	0	0	0	0	0
								Medium_Lowland	PAN2423	0	1	2016-08-29	2016	rice	0	3310.6	0	?	0	4.15	0.837	1	1	0	0.993	?	?	?	?	1401.4	8	12.779	12.565	12.195	11.702	10.468	8	8	8	8	8	8	8	213.905	0	0	0	0	0
								Medium_Lowland	PAN2423	0	1	2016-08-30	2016	rice	0	3519.6	0	?	0	0.37	0.857	1	1	0	0.986	?	?	?	?	1442.3	8	12.77	12.776	12.389	11.873	10.582	8	8	8	8	8	8	8	198.469	0	0	0	0	0
								Medium_Lowland	PAN2423	0	1	2016-08-31	2016	rice	0	3623.7	0	?	0	7.96	0.877	1	1	0	0.996	?	?	?	?	1460.2	8	15.113	13.91	13.431	12.792	11.195	8	8	8	8	8	8	8	190.131	0	0	0	0	0
								Medium_Lowland	PAN2423	0	1	2016-09-01	2016	rice	0	3813.8	0	?	0	3.67	0.897	1	1	0	0.993	?	?	?	?	1488.2	8	9.608	9.87	9.719	9.516	9.011	8	8	8	8	8	8	8	182.39	0	0	0	0	0
								Medium_Lowland	PAN2423	0	1	2016-09-02	2016	rice	0	4011	0	?	0	7.22	0.917	1	1	0	0.993	?	?	?	?	1512.5	8	11.986	11.828	11.518	11.104	10.069	8	8	8	8	8	8	8	175.557	0	0	0	0	0
								Medium_Lowland	PAN2423	0	1	2016-09-03	2016	rice	0	4143.2	0	?	0	18.11	0.937	1	1	0	0.994	?	?	?	?	1525.6	8	12.66	12.03	11.703	11.267	10.178	8	8	8	8	8	8	8	179.787	0	0	0	0	0
								Medium_Lowland	PAN2423	0	1	2016-09-04	2016	rice	0	4341.9	0	?	0	19.21	0.957	1	1	0	0.993	?	?	?	?	1540.6	8	9.96	10.222	10.042	9.802	9.201	8	8	8	8	8	8	8	187.101	0	0	0	0	0
								Medium_Lowland	PAN2423	0	1	2016-09-05	2016	rice	0	4523.6	90.4	?	0	38.61	0.977	1	1	0	0.993	?	?	?	?	1549.9	8	12.177	11.898	11.582	11.16	10.107	8	8	8	8	8	8	8	211.661	0	0	0	0	0
								Medium_Lowland	PAN2423	0	1	2016-09-06	2016	rice	0	4651.3	160	?	0	17.35	0.997	1	1	0	0.994	?	?	?	?	1553.4	8	12.12	11.61	11.318	10.927	9.952	8	8	8	8	8	8	8	215.673	0	0	0	0	0
								Medium_Lowland	PAN2423	0	1	2016-09-07	2016	rice	0	4819.1	259.5	?	0	3.6	1.016	1	1	0	0.993	?	?	?	?	1554	8	10.073	10.239	10.058	9.816	9.211	8	8	8	8	8	8	8	207.445	0	0	0	0	0
								Medium_Lowland	PAN2423	0	1	2016-09-08	2016	rice	0	4979.1	393.6	?	0	2.62	1.046	1	1	0	0.993	?	?	?	?	1554	8	11.417	11.473	11.191	10.816	9.877	8	8	8	8	8	8	8	196.352	0	0	0	0	0
								Medium_Lowland	PAN2423	0	1	2016-09-09	2016	rice	0	5128.5	530.5	?	0	2.04	1.077	1	1	0	0.993	?	?	?	?	1554	8	12.702	12.436	12.076	11.597	10.398	8	8	8	8	8	8	8	183.421	0	0	0	0	0
								Medium_Lowland	PAN2423	0	1	2016-09-10	2016	rice	0	5269.5	670.4	?	0	1.95	1.107	1	1	0	0.992	?	?	?	?	1554	8	12.337	12.307	11.958	11.492	10.328	8	8	8	8	8	8	8	170.362	0	0	0	0	0
								Medium_Lowland	PAN2423	0	1	2016-09-11	2016	rice	0	5397.8	808.1	?	0	8.4	1.136	1	1	0	0.993	?	?	?	?	1554	8	13.676	13.087	12.674	12.125	10.75	8	8	8	8	8	8	8	163.022	0	0	0	0	0
								Medium_Lowland	PAN2423	0	1	2016-09-12	2016	rice	0	5504.5	933.9	?	0	14.9	1.166	1	1	0	0.993	?	?	?	?	1554	8	12.173	11.811	11.502	11.09	10.06	8	8	8	8	8	8	8	164.031	0	0	0	0	0
								Medium_Lowland	PAN2423	0	1	2016-09-13	2016	rice	0	5607.8	1062.1	?	0	7.73	1.195	1	1	0	0.993	?	?	?	?	1554	8	11.341	11.175	10.917	10.574	9.716	8	8	8	8	8	8	8	158.707	0	0	0	0	0
								Medium_Lowland	PAN2423	0	1	2016-09-14	2016	rice	0	5711	1195.1	?	0	5.05	1.225	1	1	0	0.993	?	?	?	?	1554	8	10.973	11.174	10.917	10.574	9.716	8	8	8	8	8	8	8	150.327	0	0	0	0	0
								Medium_Lowland	PAN2423	0	1	2016-09-15	2016	rice	0	5805.9	1317.9	?	0	1.98	1.255	0.954	0.994	0	0.993	?	?	?	?	1554	8	12.885	12.596	12.224	11.727	10.484	8	8	8	8	8	8	8	137.006	0	0	0	0	0
								Medium_Lowland	PAN2423	0	1	2016-09-16	2016	rice	0	5895.8	1432.9	?	0	1.87	1.285	0.954	0.994	0	0.993	?	?	?	?	1554	8	12.588	12.407	12.05	11.574	10.382	8	8	8	8	8	8	8	123.762	0	0	0	0	0
								Medium_Lowland	PAN2423	0	1	2016-09-17	2016	rice	0	5956.6	1516.2	?	0	11.93	1.315	0.954	0.994	0	0.993	?	?	?	?	1554	8	13.475	12.594	12.221	11.725	10.483	8	8	8	8	8	8	8	120.969	0	0	0	0	0
								Medium_Lowland	PAN2423	0	1	2016-09-18	2016	rice	0	6030	1609.9	?	0	1.71	1.345	0.954	0.994	0	0.993	?	?	?	?	1554	8	9.768	10.098	9.928	9.701	9.134	8	8	8	8	8	8	8	110.844	0	0	0	0	0
								Medium_Lowland	PAN2423	0	1	2016-09-19	2016	rice	0	6098.1	1696.4	?	0	2.51	1.375	0.954	0.994	0	0.992	?	?	?	?	1554	8	11.763	11.806	11.498	11.086	10.057	8	8	8	8	8	8	8	98.964	0	0	0	0	0
								Medium_Lowland	PAN2423	0	1	2016-09-20	2016	rice	0	6159.9	1774.7	?	0	1.32	1.405	0.954	0.994	0	0.992	?	?	?	?	1554	8	12.967	12.7	12.319	11.811	10.54	8	8	8	8	8	8	8	84.692	0	0	0	0	0
								Medium_Lowland	PAN2423	0	1	2016-09-21	2016	rice	0	6211.3	1840.9	?	0	13.71	1.435	0.954	0.994	0	0.993	?	?	?	?	1554	8	13.305	12.611	12.237	11.739	10.492	8	8	8	8	8	8	8	83.364	0	0	0	0	0
								Medium_Lowland	PAN2423	0	1	2016-09-22	2016	rice	0	6260.8	1903.8	?	0	7.32	1.465	0.954	0.994	0	0.993	?	?	?	?	1554	8	10.911	10.942	10.704	10.385	9.59	8	8	8	8	8	8	8	77.705	0	0	0	0	0
								Medium_Lowland	PAN2423	0	1	2016-09-23	2016	rice	0	6303.8	1958.8	?	0	10.47	1.495	0.954	0.994	0	0.993	?	?	?	?	1554	8	11.896	11.604	11.312	10.922	9.948	8	8	8	8	8	8	8	74.387	0	0	0	0	0
								Medium_Lowland	PAN2423	0	1	2016-09-24	2016	rice	0	6339.9	2005.6	?	0	9.53	1.524	0.954	0.994	0	0.993	?	?	?	?	1554	8	11.534	11.201	10.941	10.595	9.73	8	8	8	8	8	8	8	70.824	0	0	0	0	0
								Medium_Lowland	PAN2423	0	1	2016-09-25	2016	rice	0	6368.8	2044.3	?	0	8.01	1.554	0.954	0.994	0	0.993	?	?	?	?	1554	8	10.798	10.555	10.348	10.072	9.381	8	8	8	8	8	8	8	66.704	0	0	0	0	0
								Medium_Lowland	PAN2423	0	1	2016-09-26	2016	rice	0	6394.7	2079	?	0	8.03	1.584	0.954	0.994	0	0.993	?	?	?	?	1554	8	10.282	10.129	9.957	9.726	9.151	8	8	8	8	8	8	8	63.207	0	0	0	0	0
								Medium_Lowland	PAN2423	0	1	2016-09-27	2016	rice	0	6420.7	2112.8	?	0	2.75	1.614	0.954	0.994	0	0.993	?	?	?	?	1554	8	9.488	9.943	9.785	9.575	9.05	8	8	8	8	8	8	8	54.11	0	0	0	0	0
								Medium_Lowland	PAN2423	0	1	2016-09-28	2016	rice	0	6438.4	2137.7	?	0	13.81	1.643	0.954	0.994	0	0.994	?	?	?	?	1554	8	12.443	11.662	11.365	10.969	9.979	8	8	8	8	8	8	8	54.27	0	0	0	0	0
								Medium_Lowland	PAN2423	0	1	2016-09-29	2016	rice	0	6457.7	2163.3	?	0	3.98	1.673	0.954	0.994	0	0.993	?	?	?	?	1554	8	9.375	9.658	9.524	9.344	8.896	8	8	8	8	8	8	8	46.976	0	0	0	0	0
								Medium_Lowland	PAN2423	0	1	2016-09-30	2016	rice	0	6474.9	2186.3	?	0	2.07	1.703	0.954	0.994	0	0.993	?	?	?	?	1554	8	10.682	10.808	10.581	10.277	9.518	8	8	8	8	8	8	8	35.848	0	0	0	0	0
								Medium_Lowland	PAN2423	0	1	2016-10-01	2016	rice	0	6490	2206.5	?	0	4.99	1.733	0.954	0.994	0	0.993	?	?	?	?	1554	8	11.833	11.513	11.228	10.849	9.899	8	8	8	8	8	8	8	26.729	0	0	0	0	0
								Medium_Lowland	PAN2423	0	1	2016-10-02	2016	rice	0	6502.3	2223.4	?	0	2.94	1.764	0.954	0.994	0	0.993	?	?	?	?	1554	8	11.217	11.027	10.782	10.455	9.636	8	8	8	8	8	8	8	16.241	0	0	0	0	0
								Medium_Lowland	PAN2423	0	1	2016-10-03	2016	rice	0	6513.7	2239.1	?	0	0.72	1.792	0.954	0.994	0	0.992	?	?	?	?	1554	8	10.8	10.843	10.612	10.305	9.537	8	8	8	8	8	8	8	3.561	0	0	0	0	0
								Medium_Lowland	PAN2423	0	1	2016-10-04	2016	rice	0	6524.6	2253.7	?	0	1.11	1.822	0.954	0.994	0	0.993	?	?	?	?	1554	6.96	3.815	3.148	2.886	2.536	2.5	4.8	6.96	6.96	6.96	6.96	6.96	6.96	0	0	0	0	0	0
								Medium_Lowland	PAN2423	0	1	2016-10-05	2016	rice	0	6533.2	2265.7	?	0	3.49	1.852	0.954	0.994	0	0.998	?	?	?	?	1554	6.96	2.844	2.492	2.263	1.958	2.5	3.571	6.96	6.96	6.96	6.96	6.96	6.96	0	0	0	0	0	0
								Medium_Lowland	PAN2423	0	1	2016-10-06	2016	rice	0	6595.5	2331	?	0	9.69	1.882	0.954	0.994	0	0.993	?	?	?	?	1554	6.504	9.065	9.186	9.074	8.925	6.411	4.409	6.504	6.504	6.504	6.504	6.504	6.504	0	0	0	0	0	0
								Medium_Lowland	PAN2423	0	1	2016-10-07	2016	rice	0	6666.7	2405	?	0	6.55	1.912	0.954	0.994	0	0.995	?	?	?	?	1554	5.461	5.914	5.586	5.386	5.121	4.457	3.898	5.461	5.461	5.461	5.461	5.461	5.461	0	0	0	0	0	0
								Medium_Lowland	PAN2423	0	1	2016-10-08	2016	rice	0	6741.1	2481.8	?	0	8.91	1.942	0.954	0.994	0	0.995	?	?	?	?	1554	5.197	8.379	8.3	8.183	8.026	7.635	4.8	5.197	5.197	5.197	5.197	5.197	5.197	0	0	0	0	0	0
								Medium_Lowland	PAN2423	0	1	2016-10-09	2016	rice	0	6812.6	2555.6	?	0	4.54	1.971	0.954	0.994	0	0.997	?	?	?	?	1554	4.784	3.986	3.911	3.797	3.646	3.268	4.164	4.784	4.784	4.784	4.784	4.784	4.784	0	0	0	0	0	0
								Medium_Lowland	PAN2423	0	1	2016-10-10	2016	rice	0	6882	2627	?	0	12.73	2	0.954	0.994	0.779	0.997	?	?	?	?	1554	4.947	12.252	12.185	12.085	11.951	11.616	5.192	4.947	4.947	4.947	4.947	4.947	4.947	0	0	0	0	0	0
								Medium_Lowland	PAN2423	0	1	2016-10-11	2016	rice	0	6957.7	2704.5	?	0	6.79	2.03	0.954	0.994	1	0.994	?	?	?	?	1554	5.035	6.329	6.269	6.18	6.061	5.763	5.168	5.035	5.035	5.035	5.035	5.035	5.035	0	0	0	0	0	0
								Medium_Lowland	PAN2423	0	1	2016-10-12	2016	rice	0	7043	2791.5	?	0	4.17	2.059	0.954	0.994	1	0.993	?	?	?	?	1554	4.941	3.389	3.521	3.417	3.279	2.933	4.8	4.941	4.941	4.941	4.941	4.941	4.941	0	0	0	0	0	0
								Medium_Lowland	PAN2423	0	1	2016-10-13	2016	rice	0	7129.4	2879.3	?	0	0.92	2.087	0.954	0.994	1	0.985	?	?	?	?	1554	4.73	-0.063	0.57	0.855	1.14	2.5	4.413	4.73	4.73	4.73	4.73	4.73	4.73	0	0	0	0	0	0
								Medium_Lowland	PAN2423	0	1	2016-10-14	2016	rice	0	7213.1	2964.3	?	0	0.04	2.114	0.954	0.994	1	0.939	?	?	?	?	1554	4.05	-0.665	0.056	0.596	1.103	1.889	2.995	4.036	4.05	4.05	4.05	4.05	4.05	0	0	0	0	0	0
								Medium_Lowland	PAN2423	0	1	2016-10-15	2016	rice	0	7294.9	3047.3	?	0	0.01	2.14	0.954	0.994	1	0.816	?	?	?	?	1554	4.05	-0.662	-0.905	0.225	0.566	0.984	1.801	3.142	4.05	4.05	4.05	4.05	4.05	0	0	0	0	0	0
								Medium_Lowland	PAN2423	0	1	2016-10-16	2016	rice	0	7374.5	3128	?	0	0	2.167	0.954	0.994	1	0.721	?	?	?	?	1554	4.05	-0.982	-0.597	-0.88	0.189	0.35	0.843	2.222	4.05	4.05	4.05	4.05	4.05	0	0	0	0	0	0
								Medium_Lowland	PAN2423	0	1	2016-10-17	2016	rice	0	7451.3	3205.7	?	0	0	2.193	0.954	0.994	1	0.652	?	?	?	?	1554	4.05	-0.888	-0.877	-0.512	-0.919	-0.225	0.138	1.389	3.642	4.05	4.05	4.05	4.05	0	0	0	0	0	0
								Medium_Lowland	PAN2423	0	1	2016-10-18	2016	rice	0	7527.9	3283.2	?	0	0	2.22	0.954	0.994	1	0.616	?	?	?	?	1554	4.05	-0.813	-0.674	-0.8	-0.636	-0.242	-0.24	0.833	2.799	4.05	4.05	4.05	4.05	0	0	0	0	0	0
								Medium_Lowland	PAN2423	0	1	2016-10-19	2016	rice	0	7602.7	3358.7	?	0	0	2.248	0.954	0.994	1	0.575	?	?	?	?	1554	4.05	-0.812	-0.77	-0.746	-0.478	-0.237	-0.254	0.404	2.081	4.05	4.05	4.05	4.05	0	0	0	0	0	0
								Medium_Lowland	PAN2423	0	1	2016-10-20	2016	rice	0	7674.8	3431.6	?	0	0	2.274	0.954	0.994	1	0.536	?	?	?	?	1554	4.05	-0.776	-0.717	-0.656	-0.397	-0.22	-0.274	0.141	1.499	3.411	4.05	4.05	4.05	0	0	0	0	0	0
								Medium_Lowland	PAN2423	0	1	2016-10-21	2016	rice	0	7745	3502.4	?	0	0	2.3	0.954	0.994	1	0.501	?	?	?	?	1554	4.05	-0.738	-0.612	-0.453	-0.337	-0.204	-0.29	-0.307	1.049	2.702	4.05	4.05	4.05	0	0	0	0	0	0
								Medium_Lowland	PAN2423	0	1	2016-10-22	2016	rice	0	7811.1	3569.1	?	0	0	2.327	0.954	0.994	1	0.47	?	?	?	?	1554	4.05	-0.654	-0.455	-0.334	-0.248	-0.195	-0.316	-0.252	0.642	2.084	4.05	4.05	4.05	0	0	0	0	0	0
								Medium_Lowland	PAN2423	0	1	2016-10-23	2016	rice	0	7874.7	3633.2	?	0	0	2.353	0.954	0.994	1	0.444	?	?	?	?	1554	4.05	-0.431	-0.355	-0.263	-0.189	-0.187	-0.33	-0.22	0.374	1.571	3.336	4.05	4.05	0	0	0	0	0	0
								Medium_Lowland	PAN2423	0	1	2016-10-24	2016	rice	0	7934.7	3693.6	?	0	0	2.377	0.954	0.994	1	0.422	?	?	?	?	1554	4.05	-0.337	-0.288	-0.214	-0.166	-0.163	-0.341	-0.202	0.196	1.159	2.683	4.05	4.05	0	0	0	0	0	0
								Medium_Lowland	PAN2423	0	1	2016-10-25	2016	rice	0	7993.5	3752.8	?	0	0	2.401	0.954	0.994	1	0.404	?	?	?	?	1554	4.05	-0.277	-0.243	-0.187	-0.151	-0.146	-0.345	-0.192	0.077	0.834	2.128	4.05	4.05	0	0	0	0	0	0
								Medium_Lowland	PAN2423	0	1	2016-10-26	2016	rice	0	8037	3796.7	?	0	5.05	2.426	0.954	0.994	1	0.451	?	?	?	?	1554	3.348	2.817	1.428	0.609	0.004	-0.123	-0.347	-0.187	0	0.584	1.665	3.348	3.348	0	0	0	0	0	0
								Medium_Lowland	PAN2423	0	1	2016-10-27	2016	rice	0	8089.3	3849.3	?	0	22.43	2.455	0.954	0.994	1	0.788	?	?	?	?	1554	2.73	21.515	19.863	16.354	11.698	4.851	-0.19	-0.178	0	0.409	1.288	2.73	2.73	0	0	0	0	0	0
								Medium_Lowland	PAN2423	0	1	2016-10-28	2016	rice	0	8136.7	3897.1	?	0	1.95	2.483	0.954	0.994	1	0.783	?	?	?	?	1554	2.207	1.215	1.025	0.966	1.14	1.738	-0.101	-0.168	0	0.286	0.987	2.207	2.207	0	0	0	0	0	0
								Medium_Lowland	PAN2423	0	1	2016-10-29	2016	rice	0	8193.1	3953.7	?	0	1.73	2.511	0.954	0.994	1	0.791	?	?	?	?	1554	1.771	0.653	0.964	0.913	1.14	1.047	0	-0.156	0	0.2	0.751	1.771	1.771	0	0	0	0	0	0
								Medium_Lowland	PAN2423	0	1	2016-10-30	2016	fallow	0	0	0	?	0	1.46	0	1	1	1	1	?	?	?	?	0	1.41	-0.698	0.57	0.855	1.14	0.593	0.056	-0.143	0	0.14	0.568	1.41	1.41	0	0	0	0	0	0
								Medium_Lowland	PAN2423	0	1	2016-10-31	2016	fallow	0	0	0	?	0	0.63	0	1	1	1	1	?	?	?	?	0	1.35	-0.945	-1.231	0.679	1.018	0.805	0.356	0.038	0	0.098	0.427	1.115	1.35	0	0	0	0	0	0
								Medium_Lowland	PAN2423	0	1	2016-11-01	2016	fallow	0	0	0	?	0	1.26	0	1	1	1	1	?	?	?	?	0	1.35	-0.988	-0.593	-0.86	0.509	0.657	0.477	0.214	0	0.069	0.32	0.876	1.35	0	0	0	0	0	0
								Medium_Lowland	PAN2423	0	1	2016-11-02	2016	fallow	0	0	0	?	0	0.02	0	1	1	1	1	?	?	?	?	0	1.343	-1.007	-0.948	-0.542	-0.692	0.329	0.417	0.295	0	0.048	0.238	0.685	1.343	0	0	0	0	0	0
								Medium_Lowland	PAN2423	0	1	2016-11-03	2016	fallow	0	0	0	?	0	12.56	0	1	1	1	1	?	?	?	?	0	1.1	9.452	9.125	6.724	4.243	1.94	1.026	0.588	0.086	0.06	0.185	0.535	1.1	0	0	0	0	0	0
								Medium_Lowland	PAN2423	0	1	2016-11-04	2016	fallow	0	0	0	?	0	16.73	0	1	1	1	1	?	?	?	?	0	0.901	15.009	14.26	14.26	14.26	11.2	4.8	2.273	0.742	0.264	0.208	0.437	0.901	0	0	0	0	0	0
								Medium_Lowland	PAN2423	0	1	2016-11-05	2016	fallow	0	0	0	?	0	27.53	0	1	1	1	1	?	?	?	?	0	0.76	16.604	16.06	16.06	16.06	16.06	12	6.164	2.369	0.896	0.415	0.43	0.76	0	0	0	0	0	0
								Medium_Lowland	PAN2423	0	1	2016-11-06	2016	fallow	0	0	0	?	0	0.96	0	1	1	1	1	?	?	?	?	0	0.692	-1.077	0.57	0.855	1.14	2.5	4.8	5.618	3.343	1.63	0.779	0.535	0.692	0	0	0	0	0	0
								Medium_Lowland	PAN2423	0	1	2016-11-07	2016	fallow	0	0	0	?	0	0.34	0	1	1	1	1	?	?	?	?	0	0.709	-0.978	-1.381	0.713	1.14	2.39	4.8	5.291	3.928	2.319	1.241	0.747	0.709	0	0	0	0	0	0
								Medium_Lowland	PAN2423	0	1	2016-11-08	2016	fallow	0	0	0	?	0	0	0	1	1	1	1	?	?	?	?	0	0.808	-1.113	-0.668	-1.088	0.784	1.587	3.551	4.595	4.05	2.839	1.72	1.039	0.808	0	0	0	0	0	0
								Medium_Lowland	PAN2423	0	1	2016-11-09	2016	fallow	0	0	0	?	0	0	0	1	1	1	1	?	?	?	?	0	0.978	-0.964	-1.014	-0.579	-0.818	0.793	2.448	3.736	4.034	3.197	2.163	1.376	0.978	0	0	0	0	0	0
								Medium_Lowland	PAN2423	0	1	2016-11-10	2016	fallow	0	0	0	?	0	0	0	1	1	1	1	?	?	?	?	0	1.2	-0.981	-0.82	-0.819	-0.585	-0.484	1.469	2.829	3.672	3.34	2.516	1.718	1.2	0	0	0	0	0	0
								Medium_Lowland	PAN2423	0	1	2016-11-11	2016	fallow	0	0	0	?	0	0	0	1	1	1	1	?	?	?	?	0	1.35	-0.927	-0.884	-0.756	-0.678	-0.307	0.688	1.972	3.162	3.286	2.747	2.027	1.35	0	0	0	0	0	0
								Medium_Lowland	PAN2423	0	1	2016-11-12	2016	fallow	0	0	0	?	0	0	0	1	1	1	1	?	?	?	?	0	1.35	-0.913	-0.85	-0.776	-0.642	-0.286	0.29	1.299	2.603	3.082	2.848	2.273	1.35	0	0	0	0	0	0
								Medium_Lowland	PAN2423	0	1	2016-11-13	2016	fallow	0	0	0	?	0	0	0	1	1	1	1	?	?	?	?	0	2.34	-0.892	-0.846	-0.758	-0.623	-0.304	0.059	0.803	2.063	2.776	2.826	2.439	2.34	0	0	0	0	0	0
								Medium_Lowland	PAN2423	0	1	2016-11-14	2016	fallow	0	0	0	?	0	0	0	1	1	1	1	?	?	?	?	0	2.519	-0.876	-0.829	-0.741	-0.616	-0.318	-0.166	0.482	1.589	2.42	2.704	2.519	2.519	0	0	0	0	0	0
								Medium_Lowland	PAN2423	0	1	2016-11-15	2016	fallow	0	0	0	?	0	0	0	1	1	1	1	?	?	?	?	0	2.515	-0.276	-0.462	-0.528	-0.468	-0.322	-0.152	0.223	1.179	2.048	2.507	2.515	2.515	0	0	0	0	0	0
								Medium_Lowland	PAN2423	0	1	2016-11-16	2016	fallow	0	0	0	?	0	0	0	1	1	1	1	?	?	?	?	0	2.439	-0.382	-0.441	-0.452	-0.415	-0.315	-0.149	0.073	0.847	1.688	2.261	2.439	2.439	0	0	0	0	0	0
								Medium_Lowland	PAN2423	0	1	2016-11-17	2016	fallow	0	0	0	?	0	0	0	1	1	1	1	?	?	?	?	0	2.305	-0.363	-0.399	-0.406	-0.38	-0.303	-0.15	-0.191	0.593	1.359	1.991	2.305	2.305	0	0	0	0	0	0
								Medium_Lowland	PAN2423	0	1	2016-11-18	2016	fallow	0	0	0	?	0	0	0	1	1	1	1	?	?	?	?	0	2.127	-0.338	-0.365	-0.372	-0.352	-0.291	-0.162	0	0.358	1.059	1.711	2.127	2.127	0	0	0	0	0	0
								Medium_Lowland	PAN2423	0	1	2016-11-19	2016	fallow	0	0	0	?	0	0	0	1	1	1	1	?	?	?	?	0	1.921	-0.318	-0.34	-0.345	-0.33	-0.281	-0.159	-0.202	0.251	0.816	1.443	1.921	1.921	0	0	0	0	0	0
								Medium_Lowland	PAN2423	0	1	2016-11-20	2016	fallow	0	0	0	?	0	0	0	1	1	1	1	?	?	?	?	0	1.702	-0.302	-0.319	-0.323	-0.311	-0.271	-0.169	-0.185	0.115	0.606	1.192	1.702	1.702	0	0	0	0	0	0
								Medium_Lowland	PAN2423	0	1	2016-11-21	2016	fallow	0	0	0	?	0	0	0	1	1	1	1	?	?	?	?	0	1.481	-0.288	-0.302	-0.306	-0.296	-0.262	-0.175	-0.175	0.025	0.432	0.964	1.481	1.481	0	0	0	0	0	0
								Medium_Lowland	PAN2423	0	1	2016-11-22	2016	fallow	0	0	0	?	0	0	0	1	1	1	1	?	?	?	?	0	1.35	-0.276	-0.288	-0.291	-0.283	-0.255	-0.18	-0.166	0	0.302	0.765	1.266	1.35	0	0	0	0	0	0
								Medium_Lowland	PAN2423	0	1	2016-11-23	2016	fallow	0	0	0	?	0	0	0	1	1	1	1	?	?	?	?	0	1.35	-0.265	-0.276	-0.279	-0.272	-0.249	-0.183	-0.159	0	0.211	0.599	1.066	1.35	0	0	0	0	0	0
								Medium_Lowland	PAN2423	0	1	2016-11-24	2016	fallow	0	0	0	?	0	0	0	1	1	1	1	?	?	?	?	0	1.35	-0.256	-0.265	-0.268	-0.262	-0.243	-0.185	-0.152	0	0.148	0.464	0.885	1.35	0	0	0	0	0	0
								Medium_Lowland	PAN2423	0	1	2016-11-25	2016	fallow	0	0	0	?	0	0	0	1	1	1	1	?	?	?	?	0	1.318	-0.248	-0.256	-0.259	-0.254	-0.238	-0.186	-0.146	0	0.104	0.356	0.726	1.318	0	0	0	0	0	0
								Medium_Lowland	PAN2423	0	1	2016-11-26	2016	fallow	0	0	0	?	0	0	0	1	1	1	1	?	?	?	?	0	1.1	-0.24	-0.248	-0.25	-0.247	-0.233	-0.186	-0.141	0	0.073	0.271	0.59	1.1	0	0	0	0	0	0
								Medium_Lowland	PAN2423	0	1	2016-11-27	2016	fallow	0	0	0	?	0	0	0	1	1	1	1	?	?	?	?	0	0.912	-0.233	-0.24	-0.243	-0.24	-0.229	-0.186	-0.136	0	0.051	0.205	0.474	0.912	0	0	0	0	0	0
								Medium_Lowland	PAN2423	0	1	2016-11-28	2016	fallow	0	0	0	?	0	0	0	1	1	1	1	?	?	?	?	0	0.752	-0.227	-0.234	-0.236	-0.234	-0.225	-0.185	-0.132	0	0.036	0.154	0.378	0.752	0	0	0	0	0	0
								Medium_Lowland	PAN2423	0	1	2016-11-29	2016	fallow	0	0	0	?	0	0	0	1	1	1	1	?	?	?	?	0	0.616	-0.222	-0.227	-0.23	-0.229	-0.221	-0.184	-0.127	0	0.025	0.115	0.299	0.616	0	0	0	0	0	0
								Medium_Lowland	PAN2423	0	1	2016-11-30	2016	fallow	0	0	0	?	0	0	0	1	1	1	1	?	?	?	?	0	0.502	-0.216	-0.222	-0.225	-0.224	-0.217	-0.183	-0.124	0	0.017	0.086	0.235	0.502	0	0	0	0	0	0
								Medium_Lowland	PAN2423	0	1	2016-12-01	2016	fallow	0	0	0	?	0	0	0	1	1	1	1	?	?	?	?	0	0.406	-0.211	-0.217	-0.22	-0.219	-0.214	-0.181	-0.12	0	0.012	0.064	0.184	0.406	0	0	0	0	0	0
								Medium_Lowland	PAN2423	0	1	2016-12-02	2016	fallow	0	0	0	?	0	0	0	1	1	1	1	?	?	?	?	0	0.327	-0.207	-0.212	-0.215	-0.215	-0.21	-0.179	-0.117	0	0.009	0.047	0.143	0.327	0	0	0	0	0	0
								Medium_Lowland	PAN2423	0	1	2016-12-03	2016	fallow	0	0	0	?	0	0	0	1	1	1	1	?	?	?	?	0	0.262	-0.203	-0.208	-0.211	-0.211	-0.207	-0.177	-0.114	0	0.006	0.035	0.11	0.262	0	0	0	0	0	0
								Medium_Lowland	PAN2423	0	1	2016-12-04	2016	fallow	0	0	0	?	0	0	0	1	1	1	1	?	?	?	?	0	0.209	-0.199	-0.203	-0.207	-0.207	-0.204	-0.175	-0.111	-0.003	0.004	0.026	0.085	0.209	0	0	0	0	0	0
								Medium_Lowland	PAN2423	0	1	2016-12-05	2016	fallow	0	0	0	?	0	0	0	1	1	1	1	?	?	?	?	0	0.166	-0.195	-0.2	-0.203	-0.203	-0.2	-0.173	-0.108	-0.006	0.002	0.019	0.065	0.166	0	0	0	0	0	0
								Medium_Lowland	PAN2423	0	1	2016-12-06	2016	fallow	0	0	0	?	0	0	0	1	1	1	1	?	?	?	?	0	0.131	-0.191	-0.196	-0.199	-0.199	-0.197	-0.171	-0.106	-0.009	0	0.013	0.049	0.131	0	0	0	0	0	0
								Medium_Lowland	PAN2423	0	1	2016-12-07	2016	fallow	0	0	0	?	0	0	0	1	1	1	1	?	?	?	?	0	0.103	-0.188	-0.192	-0.195	-0.196	-0.194	-0.169	-0.104	-0.012	0	0.009	0.037	0.103	0	0	0	0	0	0
								Medium_Lowland	PAN2423	0	1	2016-12-08	2016	fallow	0	0	0	?	0	0	0	1	1	1	1	?	?	?	?	0	0.08	-0.185	-0.189	-0.192	-0.193	-0.191	-0.166	-0.102	-0.015	0	0.006	0.028	0.08	0	0	0	0	0	0
								Medium_Lowland	PAN2423	0	1	2016-12-09	2016	fallow	0	0	0	?	0	0	0	1	1	1	1	?	?	?	?	0	0.063	-0.182	-0.186	-0.189	-0.189	-0.188	-0.164	-0.1	-0.017	0	0.004	0.021	0.063	0	0	0	0	0	0
								Medium_Lowland	PAN2423	0	1	2016-12-10	2016	fallow	0	0	0	?	0	0	0	1	1	1	1	?	?	?	?	0	0.049	-0.179	-0.183	-0.186	-0.186	-0.185	-0.162	-0.099	-0.019	0	0.003	0.016	0.049	0	0	0	0	0	0
								Medium_Lowland	PAN2423	0	1	2016-12-11	2016	fallow	0	0	0	?	0	0	0	1	1	1	1	?	?	?	?	0	0.037	-0.176	-0.18	-0.183	-0.183	-0.183	-0.16	-0.098	-0.021	0	0.002	0.012	0.037	0	0	0	0	0	0
								Medium_Lowland	PAN2423	0	1	2016-12-12	2016	fallow	0	0	0	?	0	0.05	0	1	1	1	1	?	?	?	?	0	0.029	-0.14	-0.157	-0.168	-0.172	-0.179	-0.157	-0.096	-0.023	0	0.002	0.009	0.029	0	0	0	0	0	0
								Medium_Lowland	PAN2423	0	1	2016-12-13	2016	fallow	0	0	0	?	0	0	0	1	1	1	1	?	?	?	?	0	0.022	-0.164	-0.166	-0.169	-0.172	-0.175	-0.155	-0.095	-0.024	0	0.001	0.006	0.022	0	0	0	0	0	0
								Medium_Lowland	PAN2423	0	1	2016-12-14	2016	fallow	0	0	0	?	0	0	0	1	1	1	1	?	?	?	?	0	0.017	-0.166	-0.167	-0.169	-0.171	-0.173	-0.153	-0.094	-0.026	0	0.001	0.005	0.017	0	0	0	0	0	0
								Medium_Lowland	PAN2423	0	1	2016-12-15	2016	fallow	0	0	0	?	0	0.12	0	1	1	1	1	?	?	?	?	0	0.013	-0.084	-0.118	-0.141	-0.15	-0.167	-0.151	-0.093	-0.027	0	0.001	0.003	0.013	0	0	0	0	0	0
								Medium_Lowland	PAN2423	0	1	2016-12-16	2016	fallow	0	0	0	?	0	0	0	1	1	1	1	?	?	?	?	0	0.01	-0.147	-0.144	-0.147	-0.153	-0.163	-0.148	-0.092	-0.028	0	0	0.002	0.01	0	0	0	0	0	0
								Medium_Lowland	PAN2423	0	1	2016-12-17	2016	fallow	0	0	0	?	0	0	0	1	1	1	1	?	?	?	?	0	0.007	-0.154	-0.151	-0.152	-0.155	-0.16	-0.146	-0.091	-0.029	0	0	0.002	0.007	0	0	0	0	0	0
								Medium_Lowland	PAN2423	0	1	2016-12-18	2016	fallow	0	0	0	?	0	0	0	1	1	1	1	?	?	?	?	0	0.006	-0.155	-0.154	-0.154	-0.156	-0.158	-0.144	-0.09	-0.03	0	0	0.001	0.006	0	0	0	0	0	0
								Medium_Lowland	PAN2423	0	1	2016-12-19	2016	fallow	0	0	0	?	0	0	0	1	1	1	1	?	?	?	?	0	0.004	-0.155	-0.155	-0.155	-0.156	-0.156	-0.142	-0.089	-0.031	0	0	0.001	0.004	0	0	0	0	0	0
								Medium_Lowland	PAN2423	0	1	2016-12-20	2016	fallow	0	0	0	?	0	0	0	1	1	1	1	?	?	?	?	0	0.003	-0.154	-0.154	-0.155	-0.155	-0.155	-0.14	-0.089	-0.031	0	0	0.001	0.003	0	0	0	0	0	0
								Medium_Lowland	PAN2423	0	1	2016-12-21	2016	fallow	0	0	0	?	0	0	0	1	1	1	1	?	?	?	?	0	0.002	-0.152	-0.154	-0.154	-0.154	-0.153	-0.138	-0.088	-0.032	0	0	0.001	0.002	0	0	0	0	0	0
								Medium_Lowland	PAN2423	0	1	2016-12-22	2016	fallow	0	0	0	?	0	0	0	1	1	1	1	?	?	?	?	0	0.002	-0.151	-0.152	-0.153	-0.153	-0.152	-0.136	-0.087	-0.033	0	0	0	0.002	0	0	0	0	0	0
								Medium_Lowland	PAN2423	0	1	2016-12-23	2016	fallow	0	0	0	?	0	0	0	1	1	1	1	?	?	?	?	0	0.001	-0.15	-0.151	-0.152	-0.152	-0.15	-0.135	-0.086	-0.033	0	0	0	0.001	0	0	0	0	0	0
								Medium_Lowland	PAN2423	0	1	2016-12-24	2016	fallow	0	0	0	?	0	0	0	1	1	1	1	?	?	?	?	0	0.001	-0.148	-0.15	-0.151	-0.15	-0.149	-0.133	-0.086	-0.034	0	0	0	0.001	0	0	0	0	0	0
								Medium_Lowland	PAN2423	0	1	2016-12-25	2016	fallow	0	0	0	?	0	0	0	1	1	1	1	?	?	?	?	0	0.001	-0.147	-0.148	-0.149	-0.149	-0.147	-0.131	-0.085	-0.034	0	0	0	0.001	0	0	0	0	0	0
								Medium_Lowland	PAN2423	0	1	2016-12-26	2016	fallow	0	0	0	?	0	0	0	1	1	1	1	?	?	?	?	0	0.001	-0.145	-0.147	-0.148	-0.148	-0.146	-0.13	-0.085	-0.034	0	0	0	0.001	0	0	0	0	0	0
								Medium_Lowland	PAN2423	0	1	2016-12-27	2016	fallow	0	0	0	?	0	0	0	1	1	1	1	?	?	?	?	0	0	-0.144	-0.145	-0.146	-0.146	-0.144	-0.128	-0.084	-0.035	0	0	0	0	0	0	0	0	0	0
								Medium_Lowland	PAN2423	0	1	2016-12-28	2016	fallow	0	0	0	?	0	0	0	1	1	1	1	?	?	?	?	0	0	-0.142	-0.144	-0.145	-0.145	-0.143	-0.127	-0.083	-0.035	0	0	0	0	0	0	0	0	0	0
								Medium_Lowland	PAN2423	0	1	2016-12-29	2016	fallow	0	0	0	?	0	0	0	1	1	1	1	?	?	?	?	0	0	-0.141	-0.142	-0.143	-0.143	-0.141	-0.126	-0.083	-0.035	0	0	0	0	0	0	0	0	0	0
								Medium_Lowland	PAN2423	0	1	2016-12-30	2016	fallow	0	0	0	?	0	0	0	1	1	1	1	?	?	?	?	0	0	-0.139	-0.141	-0.142	-0.142	-0.14	-0.124	-0.082	-0.035	0	0	0	0	0	0	0	0	0	0
								Medium_Lowland	PAN2423	0	1	2016-12-31	2016	fallow	0	0	0	?	0	0	0	1	1	1	1	?	?	?	?	0	0	-0.138	-0.14	-0.14	-0.14	-0.138	-0.123	-0.082	-0.036	0	0	0	0	0	0	0	0	0	0
								Medium_Lowland	PAN2423	0	1	2017-01-01	2017	fallow	0	0	0	?	0	0	0	1	1	1	1	?	?	?	?	0	0	-0.137	-0.138	-0.139	-0.139	-0.137	-0.122	-0.081	-0.036	0	0	0	0	0	0	0	0	0	0
								Medium_Lowland	PAN2423	0	1	2017-01-02	2017	fallow	0	0	0	?	0	0.86	0	1	1	1	1	?	?	?	?	0	0	0.438	0.207	0.059	0.003	-0.113	-0.119	-0.08	-0.036	0	0	0	0	0	0	0	0	0	0
								Medium_Lowland	PAN2423	0	1	2017-01-03	2017	fallow	0	0	0	?	0	1.15	0	1	1	1	1	?	?	?	?	0	0	0.464	0.302	0.174	0.092	-0.079	-0.116	-0.08	-0.036	0	0	0	0	0	0	0	0	0	0
								Medium_Lowland	PAN2423	0	1	2017-01-04	2017	fallow	0	0	0	?	0	0.12	0	1	1	1	1	?	?	?	?	0	0	0.278	0.237	0.174	0.102	-0.05	-0.111	-0.079	-0.036	0	0	0	0	0	0	0	0	0	0
								Medium_Lowland	PAN2423	0	1	2017-01-05	2017	fallow	0	0	0	?	0	0.04	0	1	1	1	1	?	?	?	?	0	0	0.116	0.139	0.123	0.074	-0.033	-0.105	-0.078	-0.036	0	0	0	0	0	0	0	0	0	0
								Medium_Lowland	PAN2423	0	1	2017-01-06	2017	fallow	0	0	0	?	0	0	0	1	1	1	1	?	?	?	?	0	0	-0.04	0.025	0.046	0.024	-0.029	-0.1	-0.078	-0.036	0	0	0	0	0	0	0	0	0	0
								Medium_Lowland	PAN2423	0	1	2017-01-07	2017	fallow	0	0	0	?	0	0	0	1	1	1	1	?	?	?	?	0	0	-0.077	-0.028	-0.006	-0.013	-0.033	-0.096	-0.077	-0.036	0	0	0	0	0	0	0	0	0	0
								Medium_Lowland	PAN2423	0	1	2017-01-08	2017	fallow	0	0	0	?	0	0	0	1	1	1	1	?	?	?	?	0	0	-0.094	-0.059	-0.039	-0.037	-0.041	-0.092	-0.076	-0.036	0	0	0	0	0	0	0	0	0	0
								Medium_Lowland	PAN2423	0	1	2017-01-09	2017	fallow	0	0	0	?	0	0	0	1	1	1	1	?	?	?	?	0	0	-0.104	-0.078	-0.061	-0.055	-0.049	-0.089	-0.075	-0.036	0	0	0	0	0	0	0	0	0	0
								Medium_Lowland	PAN2423	0	1	2017-01-10	2017	fallow	0	0	0	?	0	0.01	0	1	1	1	1	?	?	?	?	0	0	-0.103	-0.086	-0.073	-0.066	-0.057	-0.086	-0.074	-0.036	0	0	0	0	0	0	0	0	0	0
								Medium_Lowland	PAN2423	0	1	2017-01-11	2017	fallow	0	0	0	?	0	0	0	1	1	1	1	?	?	?	?	0	0	-0.112	-0.096	-0.083	-0.076	-0.064	-0.085	-0.073	-0.036	0	0	0	0	0	0	0	0	0	0
								Medium_Lowland	PAN2423	0	1	2017-01-12	2017	fallow	0	0	0	?	0	0	0	1	1	1	1	?	?	?	?	0	0	-0.114	-0.102	-0.091	-0.083	-0.07	-0.083	-0.072	-0.036	0	0	0	0	0	0	0	0	0	0
								Medium_Lowland	PAN2423	0	1	2017-01-13	2017	fallow	0	0	0	?	0	0	0	1	1	1	1	?	?	?	?	0	0	-0.116	-0.106	-0.096	-0.088	-0.075	-0.082	-0.071	-0.035	0	0	0	0	0	0	0	0	0	0
								Medium_Lowland	PAN2423	0	1	2017-01-14	2017	fallow	0	0	0	?	0	0	0	1	1	1	1	?	?	?	?	0	0	-0.116	-0.108	-0.1	-0.093	-0.079	-0.082	-0.07	-0.035	0	0	0	0	0	0	0	0	0	0
								Medium_Lowland	PAN2423	0	1	2017-01-15	2017	fallow	0	0	0	?	0	0	0	1	1	1	1	?	?	?	?	0	0	-0.117	-0.11	-0.102	-0.096	-0.082	-0.081	-0.069	-0.035	0	0	0	0	0	0	0	0	0	0
								Medium_Lowland	PAN2423	0	1	2017-01-16	2017	fallow	0	0	0	?	0	0	0	1	1	1	1	?	?	?	?	0	0	-0.117	-0.111	-0.104	-0.098	-0.085	-0.081	-0.069	-0.035	0	0	0	0	0	0	0	0	0	0
								Medium_Lowland	PAN2423	0	1	2017-01-17	2017	fallow	0	0	0	?	0	0	0	1	1	1	1	?	?	?	?	0	0	-0.116	-0.112	-0.106	-0.1	-0.088	-0.081	-0.068	-0.035	0	0	0	0	0	0	0	0	0	0
								Medium_Lowland	PAN2423	0	1	2017-01-18	2017	fallow	0	0	0	?	0	0	0	1	1	1	1	?	?	?	?	0	0	-0.116	-0.112	-0.107	-0.101	-0.089	-0.081	-0.067	-0.035	0	0	0	0	0	0	0	0	0	0
								Medium_Lowland	PAN2423	0	1	2017-01-19	2017	fallow	0	0	0	?	0	0	0	1	1	1	1	?	?	?	?	0	0	-0.116	-0.112	-0.107	-0.102	-0.091	-0.081	-0.066	-0.034	0	0	0	0	0	0	0	0	0	0
								Medium_Lowland	PAN2423	0	1	2017-01-20	2017	fallow	0	0	0	?	0	0	0	1	1	1	1	?	?	?	?	0	0	-0.115	-0.112	-0.108	-0.103	-0.092	-0.08	-0.066	-0.034	0	0	0	0	0	0	0	0	0	0
								Medium_Lowland	PAN2423	0	1	2017-01-21	2017	fallow	0	0	0	?	0	0	0	1	1	1	1	?	?	?	?	0	0	-0.115	-0.112	-0.108	-0.103	-0.093	-0.081	-0.065	-0.034	0	0	0	0	0	0	0	0	0	0
								Medium_Lowland	PAN2423	0	1	2017-01-22	2017	fallow	0	0	0	?	0	0	0	1	1	1	1	?	?	?	?	0	0	-0.114	-0.112	-0.108	-0.104	-0.094	-0.081	-0.065	-0.034	0	0	0	0	0	0	0	0	0	0
								Medium_Lowland	PAN2423	0	1	2017-01-23	2017	fallow	0	0	0	?	0	0	0	1	1	1	1	?	?	?	?	0	0	-0.113	-0.111	-0.108	-0.104	-0.094	-0.081	-0.064	-0.033	0	0	0	0	0	0	0	0	0	0
								Medium_Lowland	PAN2423	0	1	2017-01-24	2017	fallow	0	0	0	?	0	0	0	1	1	1	1	?	?	?	?	0	0	-0.113	-0.111	-0.108	-0.104	-0.094	-0.081	-0.064	-0.033	0	0	0	0	0	0	0	0	0	0
								Medium_Lowland	PAN2423	0	1	2017-01-25	2017	fallow	0	0	0	?	0	0	0	1	1	1	1	?	?	?	?	0	0	-0.112	-0.11	-0.108	-0.104	-0.095	-0.081	-0.063	-0.033	0	0	0	0	0	0	0	0	0	0
								Medium_Lowland	PAN2423	0	1	2017-01-26	2017	fallow	0	0	0	?	0	0	0	1	1	1	1	?	?	?	?	0	0	-0.112	-0.11	-0.107	-0.104	-0.095	-0.081	-0.063	-0.033	0	0	0	0	0	0	0	0	0	0
								Medium_Lowland	PAN2423	0	1	2017-01-27	2017	fallow	0	0	0	?	0	0.01	0	1	1	1	1	?	?	?	?	0	0	-0.104	-0.106	-0.105	-0.102	-0.095	-0.08	-0.062	-0.033	0	0	0	0	0	0	0	0	0	0
								Medium_Lowland	PAN2423	0	1	2017-01-28	2017	fallow	0	0	0	?	0	0.01	0	1	1	1	1	?	?	?	?	0	0	-0.102	-0.103	-0.103	-0.1	-0.094	-0.08	-0.062	-0.032	0	0	0	0	0	0	0	0	0	0
								Medium_Lowland	PAN2423	0	1	2017-01-29	2017	fallow	0	0	0	?	0	0	0	1	1	1	1	?	?	?	?	0	0	-0.108	-0.106	-0.103	-0.101	-0.094	-0.08	-0.061	-0.032	0	0	0	0	0	0	0	0	0	0
								Medium_Lowland	PAN2423	0	1	2017-01-30	2017	fallow	0	0	0	?	0	0	0	1	1	1	1	?	?	?	?	0	0	-0.108	-0.106	-0.104	-0.101	-0.094	-0.08	-0.061	-0.032	0	0	0	0	0	0	0	0	0	0
								Medium_Lowland	PAN2423	0	1	2017-01-31	2017	fallow	0	0	0	?	0	0	0	1	1	1	1	?	?	?	?	0	0	-0.108	-0.106	-0.104	-0.101	-0.094	-0.08	-0.06	-0.032	0	0	0	0	0	0	0	0	0	0
								Medium_Lowland	PAN2423	0	1	2017-02-01	2017	fallow	0	0	0	?	0	0	0	1	1	1	1	?	?	?	?	0	0	-0.108	-0.106	-0.104	-0.101	-0.094	-0.08	-0.06	-0.032	-0.001	0	0	0	0	0	0	0	0	0
								Medium_Lowland	PAN2423	0	1	2017-02-02	2017	fallow	0	0	0	?	0	0	0	1	1	1	1	?	?	?	?	0	0	-0.107	-0.106	-0.104	-0.101	-0.093	-0.08	-0.06	-0.031	-0.002	0	0	0	0	0	0	0	0	0
								Medium_Lowland	PAN2423	0	1	2017-02-03	2017	fallow	0	0	0	?	0	0	0	1	1	1	1	?	?	?	?	0	0	-0.107	-0.105	-0.103	-0.101	-0.093	-0.079	-0.059	-0.031	-0.003	0	0	0	0	0	0	0	0	0
								Medium_Lowland	PAN2423	0	1	2017-02-04	2017	fallow	0	0	0	?	0	0	0	1	1	1	1	?	?	?	?	0	0	-0.106	-0.105	-0.103	-0.1	-0.093	-0.079	-0.059	-0.031	-0.004	0	0	0	0	0	0	0	0	0
								Medium_Lowland	PAN2423	0	1	2017-02-05	2017	fallow	0	0	0	?	0	0	0	1	1	1	1	?	?	?	?	0	0	-0.105	-0.105	-0.103	-0.1	-0.093	-0.079	-0.058	-0.031	-0.004	0	0	0	0	0	0	0	0	0
								Medium_Lowland	PAN2423	0	1	2017-02-06	2017	fallow	0	0	0	?	0	0	0	1	1	1	1	?	?	?	?	0	0	-0.105	-0.104	-0.102	-0.1	-0.093	-0.079	-0.058	-0.031	-0.005	0	0	0	0	0	0	0	0	0
								Medium_Lowland	PAN2423	0	1	2017-02-07	2017	fallow	0	0	0	?	0	0	0	1	1	1	1	?	?	?	?	0	0	-0.104	-0.104	-0.102	-0.099	-0.092	-0.079	-0.058	-0.031	-0.006	0	0	0	0	0	0	0	0	0
								Medium_Lowland	PAN2423	0	1	2017-02-08	2017	fallow	0	0	0	?	0	0	0	1	1	1	1	?	?	?	?	0	0	-0.104	-0.103	-0.101	-0.099	-0.092	-0.079	-0.058	-0.031	-0.007	0	0	0	0	0	0	0	0	0
								Medium_Lowland	PAN2423	0	1	2017-02-09	2017	fallow	0	0	0	?	0	0	0	1	1	1	1	?	?	?	?	0	0	-0.103	-0.103	-0.101	-0.098	-0.092	-0.078	-0.057	-0.031	-0.007	0	0	0	0	0	0	0	0	0
								Medium_Lowland	PAN2423	0	1	2017-02-10	2017	fallow	0	0	0	?	0	0	0	1	1	1	1	?	?	?	?	0	0	-0.103	-0.102	-0.1	-0.098	-0.091	-0.078	-0.057	-0.031	-0.008	0	0	0	0	0	0	0	0	0
								Medium_Lowland	PAN2423	0	1	2017-02-11	2017	fallow	0	0	0	?	0	0	0	1	1	1	1	?	?	?	?	0	0	-0.102	-0.102	-0.1	-0.098	-0.091	-0.078	-0.057	-0.031	-0.008	0	0	0	0	0	0	0	0	0
								Medium_Lowland	PAN2423	0	1	2017-02-12	2017	fallow	0	0	0	?	0	0	0	1	1	1	1	?	?	?	?	0	0	-0.102	-0.101	-0.1	-0.097	-0.091	-0.078	-0.056	-0.031	-0.009	0	0	0	0	0	0	0	0	0
								Medium_Lowland	PAN2423	0	1	2017-02-13	2017	fallow	0	0	0	?	0	0	0	1	1	1	1	?	?	?	?	0	0	-0.101	-0.101	-0.099	-0.097	-0.091	-0.077	-0.056	-0.031	-0.009	0	0	0	0	0	0	0	0	0
								Medium_Lowland	PAN2423	0	1	2017-02-14	2017	fallow	0	0	0	?	0	0	0	1	1	1	1	?	?	?	?	0	0	-0.101	-0.1	-0.099	-0.096	-0.09	-0.077	-0.056	-0.031	-0.01	0	0	0	0	0	0	0	0	0
								Medium_Lowland	PAN2423	0	1	2017-02-15	2017	fallow	0	0	0	?	0	0	0	1	1	1	1	?	?	?	?	0	0	-0.1	-0.1	-0.098	-0.096	-0.09	-0.077	-0.056	-0.031	-0.01	0	0	0	0	0	0	0	0	0
								Medium_Lowland	PAN2423	0	1	2017-02-16	2017	fallow	0	0	0	?	0	0	0	1	1	1	1	?	?	?	?	0	0	-0.1	-0.099	-0.098	-0.095	-0.089	-0.077	-0.055	-0.031	-0.01	0	0	0	0	0	0	0	0	0
								Medium_Lowland	PAN2423	0	1	2017-02-17	2017	fallow	0	0	0	?	0	0	0	1	1	1	1	?	?	?	?	0	0	-0.099	-0.099	-0.097	-0.095	-0.089	-0.076	-0.055	-0.031	-0.011	0	0	0	0	0	0	0	0	0
								Medium_Lowland	PAN2423	0	1	2017-02-18	2017	fallow	0	0	0	?	0	0	0	1	1	1	1	?	?	?	?	0	0	-0.099	-0.098	-0.097	-0.095	-0.089	-0.076	-0.055	-0.031	-0.011	0	0	0	0	0	0	0	0	0
								Medium_Lowland	PAN2423	0	1	2017-02-19	2017	fallow	0	0	0	?	0	0	0	1	1	1	1	?	?	?	?	0	0	-0.098	-0.098	-0.096	-0.094	-0.088	-0.076	-0.055	-0.031	-0.011	0	0	0	0	0	0	0	0	0
								Medium_Lowland	PAN2423	0	1	2017-02-20	2017	fallow	0	0	0	?	0	0	0	1	1	1	1	?	?	?	?	0	0	-0.098	-0.097	-0.096	-0.094	-0.088	-0.076	-0.055	-0.031	-0.012	0	0	0	0	0	0	0	0	0
								Medium_Lowland	PAN2423	0	1	2017-02-21	2017	fallow	0	0	0	?	0	0.01	0	1	1	1	1	?	?	?	?	0	0	-0.091	-0.093	-0.093	-0.092	-0.087	-0.075	-0.054	-0.031	-0.012	0	0	0	0	0	0	0	0	0
								Medium_Lowland	PAN2423	0	1	2017-02-22	2017	fallow	0	0	0	?	0	0.01	0	1	1	1	1	?	?	?	?	0	0	-0.089	-0.091	-0.091	-0.09	-0.087	-0.075	-0.054	-0.031	-0.012	0	0	0	0	0	0	0	0	0
								Medium_Lowland	PAN2423	0	1	2017-02-23	2017	fallow	0	0	0	?	0	0.17	0	1	1	1	1	?	?	?	?	0	0	0.019	-0.025	-0.053	-0.063	-0.081	-0.074	-0.054	-0.031	-0.012	0	0	0	0	0	0	0	0	0
								Medium_Lowland	PAN2423	0	1	2017-02-24	2017	fallow	0	0	0	?	0	0.02	0	1	1	1	1	?	?	?	?	0	0	-0.059	-0.057	-0.059	-0.065	-0.078	-0.074	-0.054	-0.031	-0.012	0	0	0	0	0	0	0	0	0
								Medium_Lowland	PAN2423	0	1	2017-02-25	2017	fallow	0	0	0	?	0	0	0	1	1	1	1	?	?	?	?	0	0	-0.083	-0.073	-0.07	-0.072	-0.076	-0.073	-0.053	-0.031	-0.013	0	0	0	0	0	0	0	0	0
								Medium_Lowland	PAN2423	0	1	2017-02-26	2017	fallow	0	0	0	?	0	0	0	1	1	1	1	?	?	?	?	0	0	-0.088	-0.081	-0.077	-0.077	-0.076	-0.072	-0.053	-0.031	-0.013	0	0	0	0	0	0	0	0	0
								Medium_Lowland	PAN2423	0	1	2017-02-27	2017	fallow	0	0	0	?	0	0	0	1	1	1	1	?	?	?	?	0	0	-0.09	-0.085	-0.081	-0.08	-0.076	-0.072	-0.053	-0.031	-0.013	0	0	0	0	0	0	0	0	0
								Medium_Lowland	PAN2423	0	1	2017-02-28	2017	fallow	0	0	0	?	0	0	0	1	1	1	1	?	?	?	?	0	0	-0.091	-0.087	-0.084	-0.082	-0.077	-0.071	-0.053	-0.031	-0.013	0	0	0	0	0	0	0	0	0
								Medium_Lowland	PAN2423	0	1	2017-03-01	2017	fallow	0	0	0	?	0	0	0	1	1	1	1	?	?	?	?	0	0	-0.092	-0.089	-0.086	-0.083	-0.077	-0.071	-0.053	-0.031	-0.013	0	0	0	0	0	0	0	0	0
								Medium_Lowland	PAN2423	0	1	2017-03-02	2017	fallow	0	0	0	?	0	0	0	1	1	1	1	?	?	?	?	0	0	-1.086	-0.686	-0.428	-0.328	-0.118	-0.072	-0.053	-0.031	-0.013	0	0	0	0	0	0	0	0	0
								Medium_Lowland	PAN2423	0	1	2017-03-03	2017	fallow	0	0	0	?	0	0	0	1	1	1	1	?	?	?	?	0	0	-0.375	-0.396	-0.367	-0.289	-0.14	-0.075	-0.052	-0.031	-0.014	0	0	0	0	0	0	0	0	0
								Medium_Lowland	PAN2423	0	1	2017-03-04	2017	fallow	0	0	0	?	0	0	0	1	1	1	1	?	?	?	?	0	0	-0.277	-0.313	-0.303	-0.249	-0.15	-0.078	-0.052	-0.031	-0.014	0	0	0	0	0	0	0	0	0
								Medium_Lowland	PAN2423	0	1	2017-03-05	2017	fallow	0	0	0	?	0	1.24	0	1	1	1	1	?	?	?	?	0	0	-0.248	-0.27	-0.261	-0.225	-0.154	-0.08	-0.052	-0.031	-0.014	0	0	0	0	0	0	0	0	0
								Medium_Lowland	PAN2423	0	1	2017-03-06	2017	fallow	0	0	0	?	0	1.46	0	1	1	1	1	?	?	?	?	0	0	-0.232	-0.244	-0.236	-0.21	-0.155	-0.083	-0.052	-0.031	-0.014	0	0	0	0	0	0	0	0	0
								Medium_Lowland	PAN2423	0	1	2017-03-07	2017	fallow	0	0	0	?	0	0.07	0	1	1	1	1	?	?	?	?	0	0	-0.222	-0.227	-0.22	-0.199	-0.154	-0.085	-0.053	-0.031	-0.014	0	0	0	0	0	0	0	0	0
								Medium_Lowland	PAN2423	0	1	2017-03-08	2017	fallow	0	0	0	?	0	14.6	0	1	1	1	1	?	?	?	?	0	0	12.961	11.514	8.78	5.363	2.316	0.055	-0.05	-0.031	-0.014	0	0	0	0	0	0	0	0	0
								Medium_Lowland	PAN2423	0	1	2017-03-09	2017	fallow	0	0	0	?	0	2.89	0	1	1	1	1	?	?	?	?	0	0	0.766	1.787	1.787	1.787	1.179	0.354	-0.041	-0.031	-0.014	0	0	0	0	0	0	0	0	0
								Medium_Lowland	PAN2423	0	1	2017-03-10	2017	fallow	0	0	0	?	0	10.68	0	1	1	1	1	?	?	?	?	0	0	8.255	8.346	8.346	8.346	4.525	2.175	0.015	-0.03	-0.014	0	0	0	0	0	0	0	0	0.1
								Medium_Lowland	PAN2423	0	1	2017-03-11	2017	fallow	0	0	0	?	0	35.29	0	1	1	1	1	?	?	?	?	0	0	21.384	21.384	21.384	21.384	21.384	12	4.648	0.112	-0.01	0	0	0	0	0	0	0	0	0.2
								Medium_Lowland	PAN2423	0	1	2017-03-12	2017	fallow	0	0	0	?	0	4.3	0	1	1	1	1	?	?	?	?	0	0	1.83	1.83	1.83	1.83	2.5	4.8	4.519	1.291	0.037	0	0	0	0	0	0	0	0	0
								Medium_Lowland	PAN2423	0	1	2017-03-13	2017	fallow	0	0	0	?	0	0.12	0	1	1	1	1	?	?	?	?	0	0	-1.096	-1.297	0.855	1.14	2.5	4.8	4.631	2.059	0.356	0	0	0	0	0	0	0	0	0
								Medium_Lowland	PAN2423	0	1	2017-03-14	2017	fallow	0	0	0	?	0	0	0	1	1	1	1	?	?	?	?	0	0.026	-1.163	-0.698	-1.067	0.997	1.984	3.753	4.28	2.725	0.966	0.289	0.087	0.026	0	0	0	0	0	0
								Medium_Lowland	PAN2423	0	1	2017-03-15	2017	fallow	0	0	0	?	0	0	0	1	1	1	1	?	?	?	?	0	0.097	-1.008	-1.032	-0.589	-0.659	0.992	2.649	3.628	2.996	1.575	0.675	0.263	0.097	0	0	0	0	0	0
								Medium_Lowland	PAN2423	0	1	2017-03-16	2017	fallow	0	0	0	?	0	0	0	1	1	1	1	?	?	?	?	0	0.22	-1.016	-0.845	-0.765	0	0.167	1.656	2.839	2.949	1.987	1.069	0.505	0.22	0	0	0	0	0	0
								Medium_Lowland	PAN2423	0	1	2017-03-17	2017	fallow	0	0	0	?	0	0.08	0	1	1	1	1	?	?	?	?	0	0.387	-0.868	-0.827	-0.473	-0.868	0.083	1.027	2.114	2.698	2.201	1.408	0.776	0.387	0	0	0	0	0	0
								Medium_Lowland	PAN2423	0	1	2017-03-18	2017	fallow	0	0	0	?	0	0.25	0	1	1	1	1	?	?	?	?	0	0.583	-0.781	-0.658	-0.748	-0.534	-0.405	0.616	1.515	2.343	2.244	1.659	1.041	0.583	0	0	0	0	0	0
								Medium_Lowland	PAN2423	0	1	2017-03-19	2017	fallow	0	0	0	?	0	2.26	0	1	1	1	1	?	?	?	?	0	0.789	-0.359	-0.515	-0.523	-0.489	-0.323	0.208	0.992	1.938	2.152	1.807	1.271	0.789	0	0	0	0	0	0
								Medium_Lowland	PAN2423	0	1	2017-03-20	2017	fallow	0	0	0	?	0	11.77	0	1	1	1	1	?	?	?	?	0	0.987	8.832	8.411	5.85	2.953	0.936	0.37	0.743	1.58	1.98	1.859	1.447	0.987	0	0	0	0	0	0
								Medium_Lowland	PAN2423	0	1	2017-03-21	2017	fallow	0	0	0	?	0	0	0	1	1	1	1	?	?	?	?	0	1.16	-1.096	-1.297	0.855	1.14	1.038	0.637	0.701	1.316	1.781	1.835	1.564	1.16	0	0	0	0	0	0
								Medium_Lowland	PAN2423	0	1	2017-03-22	2017	fallow	0	0	0	?	0	0.12	0	1	1	1	1	?	?	?	?	0	1.299	-1.163	-0.698	-1.067	0.997	1.018	0.79	0.736	1.142	1.589	1.762	1.623	1.299	0	0	0	0	0	0
								Medium_Lowland	PAN2423	0	1	2017-03-23	2017	fallow	0	0	0	?	0	0	0	1	1	1	1	?	?	?	?	0	1.35	-1.008	-1.032	-0.589	-0.576	0.509	0.677	0.713	1.013	1.416	1.658	1.634	1.35	0	0	0	0	0	0
								Medium_Lowland	PAN2423	0	1	2017-03-24	2017	fallow	0	0	0	?	0	0	0	1	1	1	1	?	?	?	?	0	1.35	-1.016	-0.845	-0.73	-0.521	-0.179	0.406	0.59	0.886	1.257	1.538	1.605	1.35	0	0	0	0	0	0
								Medium_Lowland	PAN2423	0	1	2017-03-25	2017	fallow	0	0	0	?	0	0	0	1	1	1	1	?	?	?	?	0	1.35	-0.959	-0.867	-0.719	-0.565	-0.22	0.172	0.423	0.747	1.104	1.408	1.546	1.35	0	0	0	0	0	0
								Medium_Lowland	PAN2423	0	1	2017-03-26	2017	fallow	0	0	0	?	0	0.03	0	1	1	1	1	?	?	?	?	0	1.35	-0.92	-0.84	-0.722	-0.578	-0.264	0.015	0.26	0.601	0.953	1.271	1.463	1.35	0	0	0	0	0	0
								Medium_Lowland	PAN2423	0	1	2017-03-27	2017	fallow	0	0	0	?	0	0.01	0	1	1	1	1	?	?	?	?	0	1.35	-0.813	-0.776	-0.692	-0.569	-0.286	-0.135	0.156	0.468	0.808	1.132	1.364	1.35	0	0	0	0	0	0
								Medium_Lowland	PAN2423	0	1	2017-03-28	2017	fallow	0	0	0	?	0	0.01	0	1	1	1	1	?	?	?	?	0	1.35	-0.729	-0.714	-0.652	-0.548	-0.312	-0.137	0.039	0.339	0.667	0.993	1.253	1.35	0	0	0	0	0	0
								Medium_Lowland	PAN2423	0	1	2017-03-29	2017	fallow	0	0	0	?	0	0.03	0	1	1	1	1	?	?	?	?	0	1.35	-0.663	-0.659	-0.611	-0.526	-0.323	-0.141	-0.197	0.237	0.538	0.856	1.134	1.35	0	0	0	0	0	0
								Medium_Lowland	PAN2423	0	1	2017-03-30	2017	fallow	0	0	0	?	0	0.03	0	1	1	1	1	?	?	?	?	0	1.35	-0.611	-0.611	-0.574	-0.476	-0.323	-0.156	-0.177	0.107	0.409	0.722	1.01	1.35	0	0	0	0	0	0
								Medium_Lowland	PAN2423	0	1	2017-03-31	2017	fallow	0	0	0	?	0	0.01	0	1	1	1	1	?	?	?	?	0	1.237	-0.568	-0.571	-0.53	-0.449	-0.32	-0.167	0	0.022	0.293	0.593	0.885	1.237	0	0	0	0	0	0
								Medium_Lowland	PAN2423	0	1	2017-04-01	2017	fallow	0	0	0	?	0	0.02	0	1	1	1	1	?	?	?	?	0	1.095	-0.533	-0.532	-0.496	-0.428	-0.316	-0.166	-0.175	0.015	0.209	0.478	0.763	1.095	0	0	0	0	0	0
								Medium_Lowland	PAN2423	0	1	2017-04-02	2017	fallow	0	0	0	?	0	0.04	0	1	1	1	1	?	?	?	?	0	0.961	-0.501	-0.499	-0.469	-0.411	-0.311	-0.175	-0.167	0	0.147	0.379	0.648	0.961	0	0	0	0	0	0
								Medium_Lowland	PAN2423	0	1	2017-04-03	2017	fallow	0	0	0	?	0	0.15	0	1	1	1	1	?	?	?	?	0	0.835	-0.474	-0.472	-0.446	-0.395	-0.306	-0.182	-0.159	0	0.103	0.296	0.542	0.835	0	0	0	0	0	0
								Medium_Lowland	PAN2423	0	1	2017-04-04	2017	fallow	0	0	0	?	0	0.25	0	1	1	1	1	?	?	?	?	0	0.719	-0.452	-0.449	-0.426	-0.382	-0.302	-0.188	-0.153	0	0.072	0.229	0.448	0.719	0	0	0	0	0	0
								Medium_Lowland	PAN2423	0	1	2017-04-05	2017	fallow	0	0	0	?	0	0.28	0	1	1	1	1	?	?	?	?	0	0.613	-0.432	-0.43	-0.409	-0.37	-0.297	-0.192	-0.147	0	0.05	0.175	0.366	0.613	0	0	0	0	0	0
								Medium_Lowland	PAN2423	0	1	2017-04-06	2017	fallow	0	0	0	?	0	0.37	0	1	1	1	1	?	?	?	?	0	0.518	-0.415	-0.413	-0.394	-0.359	-0.293	-0.194	-0.142	0	0.035	0.133	0.296	0.518	0	0	0	0	0	0
								Medium_Lowland	PAN2423	0	1	2017-04-07	2017	fallow	0	0	0	?	0	0.2	0	1	1	1	1	?	?	?	?	0	0.434	-0.4	-0.398	-0.381	-0.35	-0.289	-0.196	-0.137	0	0.025	0.101	0.238	0.434	0	0	0	0	0	0
								Medium_Lowland	PAN2423	0	1	2017-04-08	2017	fallow	0	0	0	?	0	0.63	0	1	1	1	1	?	?	?	?	0	0.36	-0.386	-0.384	-0.369	-0.341	-0.285	-0.198	-0.133	0	0.017	0.076	0.189	0.36	0	0	0	0	0	0
								Medium_Lowland	PAN2423	0	1	2017-04-09	2017	fallow	0	0	0	?	0	0.94	0	1	1	1	1	?	?	?	?	0	0.297	-0.374	-0.372	-0.359	-0.333	-0.282	-0.198	-0.129	0	0.012	0.057	0.149	0.297	0	0	0	0	0	0
								Medium_Lowland	PAN2423	0	1	2017-04-10	2017	fallow	0	0	0	?	0	0.11	0	1	1	1	1	?	?	?	?	0	0.243	-0.363	-0.361	-0.349	-0.326	-0.278	-0.198	-0.126	0	0.008	0.042	0.117	0.243	0	0	0	0	0	0
								Medium_Lowland	PAN2423	0	1	2017-04-11	2017	fallow	0	0	0	?	0	0.02	0	1	1	1	1	?	?	?	?	0	0.198	-0.353	-0.351	-0.34	-0.319	-0.274	-0.198	-0.122	0	0.006	0.031	0.091	0.198	0	0	0	0	0	0
								Medium_Lowland	PAN2423	0	1	2017-04-12	2017	fallow	0	0	0	?	0	0	0	1	1	1	1	?	?	?	?	0	0.16	-0.343	-0.342	-0.332	-0.313	-0.271	-0.198	-0.119	0	0.004	0.023	0.071	0.16	0	0	0	0	0	0
								Medium_Lowland	PAN2423	0	1	2017-04-13	2017	fallow	0	0	0	?	0	0	0	1	1	1	1	?	?	?	?	0	0.128	-0.335	-0.334	-0.325	-0.307	-0.268	-0.197	-0.117	0	0.003	0.017	0.055	0.128	0	0	0	0	0	0
								Medium_Lowland	PAN2423	0	1	2017-04-14	2017	fallow	0	0	0	?	0	0	0	1	1	1	1	?	?	?	?	0	0.102	-0.327	-0.326	-0.318	-0.301	-0.264	-0.196	-0.114	-0.004	0.002	0.013	0.042	0.102	0	0	0	0	0	0
								Medium_Lowland	PAN2423	0	1	2017-04-15	2017	fallow	0	0	0	?	0	0	0	1	1	1	1	?	?	?	?	0	0.081	-0.319	-0.319	-0.311	-0.296	-0.261	-0.194	-0.112	-0.007	0	0.009	0.032	0.081	0	0	0	0	0	0
								Medium_Lowland	PAN2423	0	1	2017-04-16	2017	fallow	0	0	0	?	0	0.18	0	1	1	1	1	?	?	?	?	0	0.064	-0.312	-0.312	-0.305	-0.291	-0.258	-0.193	-0.11	-0.011	0	0.006	0.024	0.064	0	0	0	0	0	0
								Medium_Lowland	PAN2423	0	1	2017-04-17	2017	fallow	0	0	0	?	0	0.26	0	1	1	1	1	?	?	?	?	0	0.05	-0.306	-0.305	-0.299	-0.286	-0.254	-0.191	-0.108	-0.014	0	0.004	0.018	0.05	0	0	0	0	0	0
								Medium_Lowland	PAN2423	0	1	2017-04-18	2017	fallow	0	0	0	?	0	0.35	0	1	1	1	1	?	?	?	?	0	0.039	-0.3	-0.299	-0.294	-0.281	-0.251	-0.19	-0.107	-0.016	0	0.003	0.014	0.039	0	0	0	0	0	0
								Medium_Lowland	PAN2423	0	1	2017-04-19	2017	fallow	0	0	0	?	0	3.67	0	1	1	1	1	?	?	?	?	0	0.031	0.89	0.417	0.118	-0.11	-0.231	-0.187	-0.106	-0.019	0	0.002	0.01	0.031	0	0	0	0	0	0
								Medium_Lowland	PAN2423	0	1	2017-04-20	2017	fallow	0	0	0	?	0	3.43	0	1	1	1	1	?	?	?	?	0	0.024	0.788	0.52	0.25	0.069	-0.192	-0.184	-0.104	-0.021	0	0.001	0.008	0.024	0	0	0	0	0	0
								Medium_Lowland	PAN2423	0	1	2017-04-21	2017	fallow	0	0	0	?	0	2.95	0	1	1	1	1	?	?	?	?	0	0.018	0.484	0.39	0.253	0.134	-0.149	-0.178	-0.103	-0.023	0	0.001	0.006	0.018	0	0	0	0	0	0
								Medium_Lowland	PAN2423	0	1	2017-04-22	2017	fallow	0	0	0	?	0	6.31	0	1	1	1	1	?	?	?	?	0	0.014	3.836	4.008	1.56	1.072	0.059	-0.163	-0.102	-0.024	0	0.001	0.004	0.014	0	0	0	0	0	0
								Medium_Lowland	PAN2423	0	1	2017-04-23	2017	fallow	0	0	0	?	0	6.16	0	1	1	1	1	?	?	?	?	0	0.011	3.69	3.69	3.69	1.419	0.396	-0.132	-0.1	-0.026	0	0.001	0.003	0.011	0	0	0	0	0	0
								Medium_Lowland	PAN2423	0	1	2017-04-24	2017	fallow	0	0	0	?	0	2.71	0	1	1	1	1	?	?	?	?	0	0.008	0.35	0.57	0.855	1.14	0.803	-0.077	-0.096	-0.027	0	0	0.002	0.008	0	0	0	0	0	0
								Medium_Lowland	PAN2423	0	1	2017-04-25	2017	fallow	0	0	0	?	0	0.72	0	1	1	1	1	?	?	?	?	0	0.006	-0.564	-1.052	0.713	1.049	0.85	-0.015	-0.092	-0.028	0	0	0.002	0.006	0	0	0	0	0	0
								Medium_Lowland	PAN2423	0	1	2017-04-26	2017	fallow	0	0	0	?	0	0.16	0	1	1	1	1	?	?	?	?	0	0.005	-0.842	-0.505	-0.695	0.524	0.332	0.049	-0.086	-0.029	0	0	0.001	0.005	0	0	0	0	0	0
								Medium_Lowland	PAN2423	0	1	2017-04-27	2017	fallow	0	0	0	?	0	0.28	0	1	1	1	1	?	?	?	?	0	0.004	-0.609	-0.643	-0.368	-0.392	0.166	0.094	-0.079	-0.03	0	0	0.001	0.004	0	0	0	0	0	0
								Medium_Lowland	PAN2423	0	1	2017-04-28	2017	fallow	0	0	0	?	0	0.8	0	1	1	1	1	?	?	?	?	0	0.003	-0.618	-0.518	-0.464	-0.331	-0.087	0.055	-0.074	-0.03	0	0	0.001	0.003	0	0	0	0	0	0
								Medium_Lowland	PAN2423	0	1	2017-04-29	2017	fallow	0	0	0	?	0	0.18	0	1	1	1	1	?	?	?	?	0	0.002	-0.546	-0.513	-0.435	-0.336	-0.14	-0.035	-0.071	-0.03	0	0	0	0.002	0	0	0	0	0	0
								Medium_Lowland	PAN2423	0	1	2017-04-30	2017	fallow	0	0	0	?	0	2.06	0	1	1	1	1	?	?	?	?	0	0.002	-0.407	-0.418	-0.383	-0.314	-0.167	-0.047	-0.069	-0.031	0	0	0	0.002	0	0	0	0	0	0
								Medium_Lowland	PAN2423	0	1	2017-05-01	2017	fallow	0	0	0	?	0	12.34	0	1	1	1	1	?	?	?	?	0	0.001	9.527	9.372	7.07	4.342	1.764	0.63	-0.048	-0.03	0	0	0	0.001	0	0	0	0	0	0
								Medium_Lowland	PAN2423	0	1	2017-05-02	2017	fallow	0	0	0	?	0	1.85	0	1	1	1	1	?	?	?	?	0	0.001	-0.327	0.26	0.855	1.14	1.452	0.945	0.26	-0.02	0	0	0	0.001	0	0	0	0	0	0
								Medium_Lowland	PAN2423	0	1	2017-05-03	2017	fallow	0	0	0	?	0	0.81	0	1	1	1	1	?	?	?	?	0	0.001	-0.814	-1.36	0.557	1.14	1.296	1.085	0.59	0	0	0	0	0.001	0	0	0	0	0	0
								Medium_Lowland	PAN2423	0	1	2017-05-04	2017	fallow	0	0	0	?	0	0.09	0	1	1	1	1	?	?	?	?	0	0	-1.083	-0.65	-1.121	0.706	1.001	1.052	0.775	0.028	0	0	0	0	0	0	0	0	0	0
								Medium_Lowland	PAN2423	0	1	2017-05-05	2017	fallow	0	0	0	?	0	0.21	0	1	1	1	1	?	?	?	?	0	0	-0.939	-1.011	-0.578	-0.812	0.501	0.831	0.797	0.056	0	0	0	0	0	0	0	0	0	0
								Medium_Lowland	PAN2423	0	1	2017-05-06	2017	fallow	0	0	0	?	0	0.71	0	1	1	1	1	?	?	?	?	0	0	-0.963	-0.809	-0.81	-0.579	-0.279	0.499	0.678	0.08	0	0	0	0	0	0	0	0	0	0
								Medium_Lowland	PAN2423	0	1	2017-05-07	2017	fallow	0	0	0	?	0	0.47	0	1	1	1	1	?	?	?	?	0	0	-0.843	-0.83	-0.722	-0.596	-0.277	0.187	0.482	0.196	0	0	0	0	0	0	0	0	0	0
								Medium_Lowland	PAN2423	0	1	2017-05-08	2017	fallow	0	0	0	?	0	0.83	0	1	1	1	1	?	?	?	?	0	0.001	-0.773	-0.753	-0.685	-0.569	-0.295	0.002	0.29	0.138	0.025	0.007	0.002	0.001	0	0	0	0	0	0
								Medium_Lowland	PAN2423	0	1	2017-05-09	2017	fallow	0	0	0	?	0	1.93	0	1	1	1	1	?	?	?	?	0	0.003	-0.611	-0.641	-0.61	-0.52	-0.295	-0.141	0.174	0.149	0.062	0.024	0.009	0.003	0	0	0	0	0	0
								Medium_Lowland	PAN2423	0	1	2017-05-10	2017	fallow	0	0	0	?	0	4.66	0	1	1	1	1	?	?	?	?	0	0.008	1.59	1.032	0.367	0.178	-0.179	-0.132	0.048	0.118	0.079	0.04	0.018	0.008	0	0	0	0	0	0
								Medium_Lowland	PAN2423	0	1	2017-05-11	2017	fallow	0	0	0	?	0	4.72	0	1	1	1	1	?	?	?	?	0	0.014	2.25	2.25	0.855	0.559	0.01	-0.115	-0.175	0.083	0.08	0.052	0.028	0.014	0	0	0	0	0	0
								Medium_Lowland	PAN2423	0	1	2017-05-12	2017	fallow	0	0	0	?	0	6.26	0	1	1	1	1	?	?	?	?	0	0.021	3.79	3.79	3.17	1.14	0.369	0	0	0.006	0.058	0.054	0.036	0.021	0	0	0	0	0	0
								Medium_Lowland	PAN2423	0	1	2017-05-13	2017	fallow	0	0	0	?	0	3.8	0	1	1	1	1	?	?	?	?	0	0.027	1.33	1.33	1.33	1.14	0.695	0.278	0.111	0.037	0.052	0.053	0.041	0.027	0	0	0	0	0	0
								Medium_Lowland	PAN2423	0	1	2017-05-14	2017	fallow	0	0	0	?	0	5.26	0	1	1	1	1	?	?	?	?	0	0.033	2.79	2.79	2.79	2.47	1.582	0.8	0.387	0.142	0.079	0.061	0.047	0.033	0	0	0	0	0	0
								Medium_Lowland	PAN2423	0	1	2017-05-15	2017	fallow	0	0	0	?	0	3.49	0	1	1	1	1	?	?	?	?	0	0.041	1.02	1.02	1.02	1.14	1.361	1.024	0.642	0.292	0.143	0.085	0.059	0.041	0	0	0	0	0	0
								Medium_Lowland	PAN2423	0	1	2017-05-16	2017	fallow	0	0	0	?	0	3.99	0	1	1	1	1	?	?	?	?	0	0.052	1.52	1.52	1.52	1.4	1.381	1.167	0.852	0.46	0.238	0.131	0.08	0.052	0	0	0	0	0	0
								Medium_Lowland	PAN2423	0	1	2017-05-17	2017	fallow	0	0	0	?	0	6.98	0	1	1	1	1	?	?	?	?	0	0.072	4.51	4.51	4.51	4.51	2.5	1.7	1.191	0.679	0.37	0.203	0.117	0.072	0	0	0	0	0	0
								Medium_Lowland	PAN2423	0	1	2017-05-18	2017	fallow	0	0	0	?	0	6.53	0	1	1	1	1	?	?	?	?	0	0.102	4.06	4.06	4.06	4.06	2.5	2.02	1.523	0.932	0.539	0.304	0.173	0.102	0	0	0	0	0	0
								Medium_Lowland	PAN2423	0	1	2017-05-19	2017	fallow	0	0	0	?	0	6.69	0	1	1	1	1	?	?	?	?	0	0.147	4.22	4.22	4.22	4.22	4.171	2.88	2.066	1.272	0.759	0.44	0.253	0.147	0	0	0	0	0	0
								Medium_Lowland	PAN2423	0	1	2017-05-20	2017	fallow	0	0	0	?	0	3.91	0	1	1	1	1	?	?	?	?	0	0.211	1.44	1.44	1.44	1.44	2.5	2.728	2.331	1.59	1.008	0.611	0.36	0.211	0	0	0	0	0	0
								Medium_Lowland	PAN2423	0	1	2017-05-21	2017	fallow	0	0	0	?	0	1.62	0	1	1	1	1	?	?	?	?	0	0.296	-0.518	0.145	0.855	1.14	2.5	2.637	2.453	1.849	1.26	0.806	0.494	0.296	0	0	0	0	0	0
								Medium_Lowland	PAN2423	0	1	2017-05-22	2017	fallow	0	0	0	?	0	0.39	0	1	1	1	1	?	?	?	?	0	0.402	-0.875	-1.42	0.5	1.14	1.86	2.326	2.402	2.015	1.487	1.01	0.649	0.402	0	0	0	0	0	0
								Medium_Lowland	PAN2423	0	1	2017-05-23	2017	fallow	0	0	0	?	0	2.48	0	1	1	1	1	?	?	?	?	0	0.526	-0.423	-0.254	-0.949	0.677	1.269	1.903	2.203	2.071	1.662	1.206	0.816	0.526	0	0	0	0	0	0
								Medium_Lowland	PAN2423	0	1	2017-05-24	2017	fallow	0	0	0	?	0	0.43	0	1	1	1	1	?	?	?	?	0	0.663	-1	-0.98	-0.56	-0.735	0.634	1.396	1.88	2.014	1.768	1.374	0.983	0.663	0	0	0	0	0	0
								Medium_Lowland	PAN2423	0	1	2017-05-25	2017	fallow	0	0	0	?	0	0.15	0	1	1	1	1	?	?	?	?	0	0.806	-0.994	-0.82	-0.784	-0.56	-0.311	0.837	1.463	1.849	1.792	1.499	1.138	0.806	0	0	0	0	0	0
								Medium_Lowland	PAN2423	0	1	2017-05-26	2017	fallow	0	0	0	?	0	7.11	0	1	1	1	1	?	?	?	?	0	0.944	3.989	3.507	1.116	0.398	0.024	0.388	1.033	1.604	1.735	1.57	1.268	0.944	0	0	0	0	0	0
								Medium_Lowland	PAN2423	0	1	2017-05-27	2017	fallow	0	0	0	?	0	10.11	0	1	1	1	1	?	?	?	?	0	1.071	7.64	7.64	7.64	5.758	2.5	1.233	1.113	1.457	1.652	1.595	1.366	1.071	0	0	0	0	0	0
								Medium_Lowland	PAN2423	0	1	2017-05-28	2017	fallow	0	0	0	?	0	1.77	0	1	1	1	1	?	?	?	?	0	1.18	-0.393	0.22	0.855	1.14	2.211	1.624	1.317	1.415	1.581	1.591	1.433	1.18	0	0	0	0	0	0
								Medium_Lowland	PAN2423	0	1	2017-05-29	2017	fallow	0	0	0	?	0	4.33	0	1	1	1	1	?	?	?	?	0	1.268	1.553	0.94	0.855	1.14	1.675	1.645	1.448	1.425	1.534	1.574	1.475	1.268	0	0	0	0	0	0
								Medium_Lowland	PAN2423	0	1	2017-05-30	2017	fallow	0	0	0	?	0	3.48	0	1	1	1	1	?	?	?	?	0	1.337	1.01	1.01	0.855	1.14	1.408	1.55	1.489	1.444	1.507	1.554	1.499	1.337	0	0	0	0	0	0
								Medium_Lowland	PAN2423	0	1	2017-05-31	2017	fallow	0	0	0	?	0	5.58	0	1	1	1	1	?	?	?	?	0	1.35	3.11	3.11	2.715	1.86	1.634	1.583	1.527	1.469	1.495	1.536	1.51	1.35	0	0	0	0	0	0
								Medium_Lowland	PAN2423	0	1	2017-06-01	2017	fallow	0	0	0	?	0	10.91	0	1	1	1	1	?	?	?	?	0	1.35	8.44	8.44	8.44	8.44	5.074	2.98	2.108	1.661	1.545	1.539	1.519	1.35	0	0	0	0	0	0
								Medium_Lowland	PAN2423	0	1	2017-06-02	2017	fallow	0	0	0	?	0	8.11	0	1	1	1	1	?	?	?	?	0	1.35	5.64	5.64	5.64	5.64	5.64	4.044	2.882	2.027	1.69	1.584	1.538	1.35	0	0	0	0	0	0
								Medium_Lowland	PAN2423	0	1	2017-06-03	2017	fallow	0	0	0	?	0	5.12	0	1	1	1	1	?	?	?	?	0	1.35	2.65	2.65	2.65	2.65	2.65	3.486	3.124	2.356	1.89	1.676	1.579	1.35	0	0	0	0	0	0
								Medium_Lowland	PAN2423	0	1	2017-06-04	2017	fallow	0	0	0	?	0	1.99	0	1	1	1	1	?	?	?	?	0	1.35	-0.21	0.33	0.855	1.14	2.5	3.092	3.111	2.583	2.097	1.802	1.646	1.35	0	0	0	0	0	0
								Medium_Lowland	PAN2423	0	1	2017-06-05	2017	fallow	0	0	0	?	0	1.54	0	1	1	1	1	?	?	?	?	0	1.399	-0.62	-1.23	0.593	1.14	2.39	2.811	2.991	2.705	2.28	1.945	1.736	1.399	0	0	0	0	0	0
								Medium_Lowland	PAN2423	0	1	2017-06-06	2017	fallow	0	0	0	?	0	3.37	0	1	1	1	1	?	?	?	?	0	1.841	0.38	0.228	-0.409	0.724	1.557	2.309	2.718	2.709	2.409	2.084	1.841	1.841	0	0	0	0	0	0
								Medium_Lowland	PAN2423	0	1	2017-06-07	2017	fallow	0	0	0	?	0	1.05	0	1	1	1	1	?	?	?	?	0	1.948	-0.98	0.001	0.001	0.158	0.857	1.729	2.322	2.593	2.464	2.198	1.948	1.948	0	0	0	0	0	0
								Medium_Lowland	PAN2423	0	1	2017-06-08	2017	fallow	0	0	0	?	0	1.26	0	1	1	1	1	?	?	?	?	0	2.045	-0.653	-1.144	0	0.079	0.468	1.224	1.883	2.38	2.439	2.27	2.045	2.045	0	0	0	0	0	0
								Medium_Lowland	PAN2423	0	1	2017-06-09	2017	fallow	0	0	0	?	0	3.1	0	1	1	1	1	?	?	?	?	0	2.118	0.635	0.381	-0.441	0.039	0.254	0.836	1.464	2.105	2.339	2.291	2.118	2.118	0	0	0	0	0	0
								Medium_Lowland	PAN2423	0	1	2017-06-10	2017	fallow	0	0	0	?	0	2.49	0	1	1	1	1	?	?	?	?	0	2.16	0.196	0.565	0.323	-0.052	0.127	0.552	1.1	1.804	2.178	2.257	2.16	2.16	0	0	0	0	0	0
								Medium_Lowland	PAN2423	0	1	2017-06-11	2017	fallow	0	0	0	?	0	5.53	0	1	1	1	1	?	?	?	?	0	2.164	2.868	2.485	0.855	0.414	0.244	0.429	0.831	1.512	1.978	2.173	2.164	2.164	0	0	0	0	0	0
								Medium_Lowland	PAN2423	0	1	2017-06-12	2017	fallow	0	0	0	?	0	10.83	0	1	1	1	1	?	?	?	?	0	2.133	8.36	8.36	8.2	6.335	2.5	1.258	1.002	1.359	1.793	2.059	2.133	2.133	0	0	0	0	0	0
								Medium_Lowland	PAN2423	0	1	2017-06-13	2017	fallow	0	0	0	?	0	1.25	0	1	1	1	1	?	?	?	?	0	2.074	-0.813	-1.127	0.855	1.14	2.5	1.755	1.303	1.342	1.657	1.939	2.074	2.074	0	0	0	0	0	0
								Medium_Lowland	PAN2423	0	1	2017-06-14	2017	fallow	0	0	0	?	0	0.64	0	1	1	1	1	?	?	?	?	0	2.001	-1.201	-0.721	-0.983	0.997	1.858	1.796	1.5	1.39	1.577	1.83	2.001	2.001	0	0	0	0	0	0
								Medium_Lowland	PAN2423	0	1	2017-06-15	2017	fallow	0	0	0	?	0	3.05	0	1	1	1	1	?	?	?	?	0	1.923	0.331	0.555	0.272	0.144	1.001	1.478	1.491	1.42	1.53	1.74	1.923	1.923	0	0	0	0	0	0
								Medium_Lowland	PAN2423	0	1	2017-06-16	2017	fallow	0	0	0	?	0	8.46	0	1	1	1	1	?	?	?	?	0	1.847	5.795	5.405	3.967	1.831	1.416	1.453	1.476	1.437	1.502	1.669	1.847	1.847	0	0	0	0	0	0
								Medium_Lowland	PAN2423	0	1	2017-06-17	2017	fallow	0	0	0	?	0	2.74	0	1	1	1	1	?	?	?	?	0	1.776	0.37	0.57	0.855	1.14	1.278	1.383	1.439	1.437	1.483	1.613	1.776	1.776	0	0	0	0	0	0
								Medium_Lowland	PAN2423	0	1	2017-06-18	2017	fallow	0	0	0	?	0	2.45	0	1	1	1	1	?	?	?	?	0	1.714	0.123	0.41	0.855	1.14	1.209	1.313	1.389	1.423	1.465	1.568	1.714	1.714	0	0	0	0	0	0
								Medium_Lowland	PAN2423	0	1	2017-06-19	2017	fallow	0	0	0	?	0	44.96	0	1	1	1	1	?	?	?	?	0	1.694	27.608	27.121	26.391	25.821	22.03	12	5.633	2.686	1.831	1.647	1.694	1.694	0	0	0	0	0	0.1
								Medium_Lowland	PAN2423	0	1	2017-06-20	2017	fallow	0	0	0	?	0	34.33	0	1	1	1	1	?	?	?	?	0	1.754	12	12	12	12	12	12	6.96	3.968	2.472	1.895	1.754	1.754	0	0	0	0	0	0
								Medium_Lowland	PAN2423	0	1	2017-06-21	2017	fallow	0	0	0	?	0	8.34	0	1	1	1	1	?	?	?	?	0	1.891	5.87	5.87	5.87	5.87	5.87	5.87	6.96	4.05	2.946	2.21	1.891	1.891	0	0	0	0	0	0
								Medium_Lowland	PAN2423	0	1	2017-06-22	2017	fallow	0	0	0	?	0	3.82	0	1	1	1	1	?	?	?	?	0	2.123	1.35	1.35	1.35	1.35	2.5	4.8	6.88	5.549	3.727	2.665	2.123	2.123	0	0	0	0	0	0
								Medium_Lowland	PAN2423	0	1	2017-06-23	2017	fallow	0	0	0	?	0	19.09	0	1	1	1	1	?	?	?	?	0	2.41	15.45	15.45	15.45	15.45	14.3	12	6.96	6.96	4.05	3.08	2.41	2.41	0	0	0	0	0	0
								Medium_Lowland	PAN2423	0	1	2017-06-24	2017	fallow	0	0	0	?	0	15.62	0	1	1	1	1	?	?	?	?	0	2.884	10.04	10.04	10.04	10.04	10.04	10.04	8	8	6.105	3.988	2.884	2.884	0	0	0	0	0	0
								Medium_Lowland	PAN2423	0	1	2017-06-25	2017	fallow	0	0	0	?	0	4.03	0	1	1	1	1	?	?	?	?	0	3.234	1.56	1.56	1.56	1.56	2.5	4.8	6.96	6.96	6.96	4.05	3.234	3.234	0	0	0	0	0	0
								Medium_Lowland	PAN2423	0	1	2017-06-26	2017	fallow	0	0	0	?	0	8.25	0	1	1	1	1	?	?	?	?	0	3.966	5.78	5.78	5.78	5.78	4.84	4.8	6.96	6.96	6.96	5.675	3.966	3.966	0	0	0	0	0	0
								Medium_Lowland	PAN2423	0	1	2017-06-27	2017	fallow	0	0	0	?	0	10.79	0	1	1	1	1	?	?	?	?	0	4.05	8.32	8.32	8.32	8.32	8.32	6.06	6.96	6.96	6.96	6.96	4.05	4.05	0	0	0	0	0	0
								Medium_Lowland	PAN2423	0	1	2017-06-28	2017	fallow	0	0	0	?	0	4.89	0	1	1	1	1	?	?	?	?	0	5.456	2.42	2.42	2.42	2.42	2.5	4.8	6.792	6.792	6.792	6.792	5.456	5.456	0	0	0	0	0	0
								Medium_Lowland	PAN2423	0	1	2017-06-29	2017	fallow	0	0	0	?	0	3.49	0	1	1	1	1	?	?	?	?	0	5.995	1.02	1.02	1.02	1.14	2.5	4.8	5.995	5.995	5.995	5.995	5.995	5.995	0	0	0	0	0	0
								Medium_Lowland	PAN2423	0	1	2017-06-30	2017	fallow	0	0	0	?	0	7.65	0	1	1	1	1	?	?	?	?	0	5.36	5.18	5.18	5.18	5.06	3.62	4.408	5.36	5.36	5.36	5.36	5.36	5.36	0	0	0	0	0	0
								Medium_Lowland	PAN2423	0	1	2017-07-01	2017	fallow	0	0	0	?	0	41.21	0	1	1	1	1	?	?	?	?	0	6.96	17.388	17.388	17.388	17.388	17.388	12	6.96	6.96	6.96	6.96	6.96	6.96	17.497	0	0	0	0	0
								Medium_Lowland	PAN2423	0	1	2017-07-02	2017	fallow	0	0	0	?	0	12.03	0	1	1	1	1	?	?	?	?	0	7.68	12.299	12	12	12	12	12	7.68	7.68	7.68	7.68	7.68	7.68	13.035	0	0	0	0	0
								Medium_Lowland	PAN2423	0	1	2017-07-03	2017	rice	0	4.3	0	?	0	25.88	0.015	1	1	1	1	?	?	?	?	2.6	8	7.701	8	8	8	8	8	8	8	8	8	8	8	25.713	0	0	0	0	0
								Medium_Lowland	PAN2423	0	1	2017-07-04	2017	rice	0	9.9	0	?	0	11.52	0.031	1	1	1	1	?	?	?	?	5.9	8	8	8	8	8	8	8	8	8	8	8	8	8	23.832	0	0	0	0	0
								Medium_Lowland	PAN2423	0	1	2017-07-05	2017	rice	0	13.9	0	?	0	8.3	0.045	1	1	1	1	?	?	?	?	8.3	8	8.997	8	8	8	8	8	8	8	8	8	8	8	20.444	0	0	0	0	0
								Medium_Lowland	PAN2423	0	1	2017-07-06	2017	rice	0	17.2	0	?	0	12.33	0.06	1	1	1	1	?	?	?	?	10.3	8	8.52	8	8	8	8	8	8	8	8	8	8	8	22.859	0	0	0	0	0
								Medium_Lowland	PAN2423	0	1	2017-07-07	2017	rice	0	28.3	0	?	0	14.44	0.075	1	1	1	1	?	?	?	?	17	8	6.483	8	8	8	8	8	8	8	8	8	8	8	25.937	0	0	0	0	0
								Medium_Lowland	PAN2423	0	1	2017-07-08	2017	rice	0	43.9	0	?	0	13.97	0.09	1	1	1	1	?	?	?	?	26.3	8	8	8	8	8	8	8	8	8	8	8	8	8	26.361	0	0	0	0	0
								Medium_Lowland	PAN2423	0	1	2017-07-09	2017	rice	0	64.9	0	?	0	6.38	0.105	1	1	1	1	?	?	?	?	38.9	8	8	8	8	8	8	8	8	8	8	8	8	8	18.812	0	0	0	0	0
								Medium_Lowland	PAN2423	0	1	2017-07-10	2017	rice	0	87.2	0	?	0	14.34	0.12	1	1	1	1	?	?	?	?	52.3	8	8.184	8	8	8	8	8	8	8	8	8	8	8	20.488	0	0	0	0	0
								Medium_Lowland	PAN2423	0	1	2017-07-11	2017	rice	0	112	0	?	0	33.64	0.136	1	1	1	1	?	?	?	?	67.2	8	8.446	8	8	8	8	8	8	8	8	8	8	8	42.35	0	0	0	0	0
								Medium_Lowland	PAN2423	0	1	2017-07-12	2017	rice	0	136.5	0	?	0	37.98	0.151	1	1	1	1	?	?	?	?	81.9	8	8.604	8	8	8	8	8	8	8	8	8	8	8	69.765	0	0	0	0	0
								Medium_Lowland	PAN2423	0	1	2017-07-13	2017	rice	0	183.2	0	?	0	12.62	0.166	1	1	1	1	?	?	?	?	109.9	8	7.234	8	8	8	8	8	8	8	8	8	8	8	71.637	0	0	0	0	0
								Medium_Lowland	PAN2423	0	1	2017-07-14	2017	rice	0	242.7	0	?	0	6.84	0.181	1	1	1	1	?	?	?	?	145.6	8	8.022	8	8	8	8	8	8	8	8	8	8	8	66.974	0	0	0	0	0
								Medium_Lowland	PAN2423	0	1	2017-07-15	2017	rice	0	294.3	0	?	0	2.87	0.196	1	1	1	1	?	?	?	?	176.6	8	7.85	8	8	8	8	8	8	8	8	8	8	8	58.149	0	0	0	0	0
								Medium_Lowland	PAN2423	0	1	2017-07-16	2017	rice	0	363.5	0	?	0	5.25	0.211	1	1	1	1	?	?	?	?	218.1	8	7.66	8	8	8	8	8	8	8	8	8	8	8	50.849	0	0	0	0	0
								Medium_Lowland	PAN2423	0	1	2017-07-17	2017	rice	0	421.7	0	?	0	8.66	0.226	1	1	1	1	?	?	?	?	253	8	8.29	8	8	8	8	8	8	8	8	8	8	8	47.004	0	0	0	0	0
								Medium_Lowland	PAN2423	0	1	2017-07-18	2017	rice	0	487.8	0	?	0	8.75	0.241	1	1	1	1	?	?	?	?	292.7	8	7.851	8	8	8	8	8	8	8	8	8	8	8	43.462	0	0	0	0	0
								Medium_Lowland	PAN2423	0	1	2017-07-19	2017	rice	0	531.7	0	?	0	26.22	0.256	1	1	1	1	?	?	?	?	319	8	9.198	8	8	8	8	8	8	8	8	8	8	8	58.548	0	0	0	0	0
								Medium_Lowland	PAN2423	0	1	2017-07-20	2017	rice	0	541.1	0	?	0	69.5	0.272	1	1	1	1	?	?	?	?	324.7	8	8.306	8	8	8	8	8	8	8	8	8	8	8	118.959	0	0	0	0	0
								Medium_Lowland	PAN2423	0	1	2017-07-21	2017	rice	0	560.1	0	?	0	136.76	0.287	1	1	1	1	?	?	?	?	336.1	8	8	8	8	8	8	8	8	8	8	8	8	8	247.149	0	0	0	0	0
								Medium_Lowland	PAN2423	0	1	2017-07-22	2017	rice	0	593.9	0	?	0	45.53	0.302	1	1	1	1	?	?	?	?	356.3	8	7.996	8	8	8	8	8	8	8	8	8	8	8	283.748	0	0	0	0	0
								Medium_Lowland	PAN2423	0	1	2017-07-23	2017	rice	0	39.1	0	?	0	55.68	0.317	1	1	1	1	?	?	?	?	23.5	8	8.004	8	8	8	8	8	8	8	8	8	8	8	299.797	0	0	0	0	0
								Medium_Lowland	PAN2423	0	1	2017-07-24	2017	rice	0	40.7	0	?	0	93.68	0.317	1	1	1	0.982	?	?	?	?	24.4	8	8	8	8	8	8	8	8	8	8	8	8	8	299.579	0	0	0	0	0
								Medium_Lowland	PAN2423	0	1	2017-07-25	2017	rice	0	44.5	0	?	0	20.9	0.317	1	1	1	0.96	?	?	?	?	26.7	8	7.729	8.02	8	8	8	8	8	8	8	8	8	8	299.125	0	0	0	0	0
								Medium_Lowland	PAN2423	0	1	2017-07-26	2017	rice	0	49.6	0	?	0	17.21	0.317	1	1	1	0.965	?	?	?	?	29.8	8	7.728	8.049	8.012	8	8	8	8	8	8	8	8	8	298.78	0	0	0	0	0
								Medium_Lowland	PAN2423	0	1	2017-07-27	2017	rice	0	56.3	0	?	0	7.23	0.317	1	1	1	0.894	?	?	?	?	33.8	8	7.499	8.074	8.03	8	8	8	8	8	8	8	8	8	294.786	0	0	0	0	0
								Medium_Lowland	PAN2423	0	1	2017-07-28	2017	rice	0	63.9	0	?	0	8.24	0.317	1	1	1	0.875	?	?	?	?	38.3	8	7.843	8.122	8.061	8	8	8	8	8	8	8	8	8	290.592	0	0	0	0	0
								Medium_Lowland	PAN2423	0	1	2017-07-29	2017	rice	0	71.3	0	?	0	2.2	0.317	1	1	1	0.892	?	?	?	?	42.8	8	8.268	8.161	8.092	8	8	8	8	8	8	8	8	8	279.922	0	0	0	0	0
								Medium_Lowland	PAN2423	0	1	2017-07-30	2017	rice	0	79.2	0	?	0	5.03	0.317	1	1	1	0.926	?	?	?	?	47.5	8	8.53	8.161	8.101	8.02	8	8	8	8	8	8	8	8	272.676	0	0	0	0	0
								Medium_Lowland	PAN2423	0	1	2017-07-31	2017	rice	0	89.1	0	?	0	7.3	0.317	1	1	1	0.928	?	?	?	?	53.5	8	8.14	8.159	8.106	8.035	8	8	8	8	8	8	8	8	268.122	0	0	0	0	0
								Medium_Lowland	PAN2423	0	1	2017-08-01	2017	rice	0	102.8	0	?	0	3.17	0.332	1	1	1	0.917	?	?	?	?	61.7	8	8.011	8.21	8.147	8.063	8	8	8	8	8	8	8	8	258.935	0	0	0	0	0
								Medium_Lowland	PAN2423	0	1	2017-08-02	2017	rice	0	109.9	0	?	0	9.62	0.348	1	1	1	0.981	?	?	?	?	66	8	9.676	8.313	8.228	8.114	8	8	8	8	8	8	8	8	257.189	0	0	0	0	0
								Medium_Lowland	PAN2423	0	1	2017-08-03	2017	rice	0	127.3	0	?	0	15.58	0.363	1	1	1	0.962	?	?	?	?	76.4	8	7.39	8.131	8.098	8.055	8	8	8	8	8	8	8	8	262.354	0	0	0	0	0
								Medium_Lowland	PAN2423	0	1	2017-08-04	2017	rice	0	153.4	0	?	0	17.6	0.378	1	1	1	0.943	?	?	?	?	92	8	8.044	8.335	8.258	8.155	8	8	8	8	8	8	8	8	268.11	0	0	0	0	0
								Medium_Lowland	PAN2423	0	1	2017-08-05	2017	rice	0	180.7	0	?	0	13.64	0.394	1	1	1	0.969	?	?	?	?	108.4	8	9	8.536	8.421	8.268	8	8	8	8	8	8	8	8	269.713	0	0	0	0	0
								Medium_Lowland	PAN2423	0	1	2017-08-06	2017	rice	0	218.3	0	?	0	5.28	0.409	1	1	1	0.958	?	?	?	?	131	8	8.363	8.507	8.406	8.27	8	8	8	8	8	8	8	8	263.246	0	0	0	0	0
								Medium_Lowland	PAN2423	0	1	2017-08-07	2017	rice	0	257.1	0	?	0	7.78	0.426	1	1	1	0.983	?	?	?	?	154.2	8	9.214	8.724	8.588	8.407	8	8	8	8	8	8	8	8	259.216	0	0	0	0	0
								Medium_Lowland	PAN2423	0	1	2017-08-08	2017	rice	0	325.2	0	?	0	8.8	0.442	1	1	1	0.946	?	?	?	?	195.1	8	8.016	8.684	8.563	8.402	8	8	8	8	8	8	8	8	255.752	0	0	0	0	0
								Medium_Lowland	PAN2423	0	1	2017-08-09	2017	rice	0	411.6	0	?	0	6.4	0.459	1	1	1	0.946	?	?	?	?	247	8	9.564	9.453	9.211	8.888	8.081	8	8	8	8	8	8	8	248.014	0	0	0	0	0
								Medium_Lowland	PAN2423	0	1	2017-08-10	2017	rice	0	499.4	0	?	0	13.55	0.477	1	1	0.505	0.965	?	?	?	?	299.7	8	10.422	9.839	9.549	9.162	8.194	8	8	8	8	8	8	8	247.491	0	0	0	0	0
								Medium_Lowland	PAN2423	0	1	2017-08-11	2017	rice	0	581.6	0	?	0	15.24	0.494	1	1	0	0.988	?	?	?	?	349	8	10.309	9.677	9.426	9.09	8.252	8	8	8	8	8	8	8	249.897	0	0	0	0	0
								Medium_Lowland	PAN2423	0	1	2017-08-12	2017	rice	0	618.6	0	?	0	24.53	0.511	1	1	0	0.99	?	?	?	?	371.2	8	10.278	9.486	9.273	8.99	8.283	8	8	8	8	8	8	8	262.974	0	0	0	0	0
								Medium_Lowland	PAN2423	0	1	2017-08-13	2017	rice	0	690.4	0	?	0	11.34	0.528	1	1	0	0.989	?	?	?	?	413.3	8	8.276	8.65	8.562	8.443	8.148	8	8	8	8	8	8	8	264.038	0	0	0	0	0
								Medium_Lowland	PAN2423	0	1	2017-08-14	2017	rice	0	773.6	0	?	0	16.62	0.544	1	1	0	0.99	?	?	?	?	460.5	8	9.257	9.253	9.09	8.872	8.327	8	8	8	8	8	8	8	269.129	0	0	0	0	0
								Medium_Lowland	PAN2423	0	1	2017-08-15	2017	rice	0	899.4	0	?	0	12.43	0.561	1	1	0	0.966	?	?	?	?	529.3	8	8.898	9.49	9.304	9.055	8.435	8	8	8	8	8	8	8	268.888	0	0	0	0	0
								Medium_Lowland	PAN2423	0	1	2017-08-16	2017	rice	0	1009.1	0	?	0	7.56	0.578	1	1	0	0.988	?	?	?	?	587	8	11.497	10.739	10.41	9.972	8.877	8	8	8	8	8	8	8	262.21	0	0	0	0	0
								Medium_Lowland	PAN2423	0	1	2017-08-17	2017	rice	0	1159.9	0	?	0	9.52	0.595	1	1	0	0.968	?	?	?	?	663.3	8	9.824	10.217	9.962	9.62	8.768	8	8	8	8	8	8	8	258.049	0	0	0	0	0
								Medium_Lowland	PAN2423	0	1	2017-08-18	2017	rice	0	1303.9	0	?	0	4.88	0.612	1	1	0	0.984	?	?	?	?	733.3	8	12.507	11.779	11.359	10.799	9.4	8	8	8	8	8	8	8	247.407	0	0	0	0	0
								Medium_Lowland	PAN2423	0	1	2017-08-19	2017	rice	0	1459.2	0	?	0	9.93	0.628	1	1	0	0.985	?	?	?	?	805.7	8	11.471	11.23	10.884	10.423	9.269	8	8	8	8	8	8	8	242.969	0	0	0	0	0
								Medium_Lowland	PAN2423	0	1	2017-08-20	2017	rice	0	1634.6	0	?	0	12.68	0.645	1	1	0	0.98	?	?	?	?	883.9	8	11.707	11.63	11.255	10.754	9.502	8	8	8	8	8	8	8	240.688	0	0	0	0	0
								Medium_Lowland	PAN2423	0	1	2017-08-21	2017	rice	0	1812.7	0	?	0	5.99	0.662	1	1	0	0.987	?	?	?	?	959.7	8	12.912	12.416	11.974	11.385	9.914	8	8	8	8	8	8	8	230.894	0	0	0	0	0
								Medium_Lowland	PAN2423	0	1	2017-08-22	2017	rice	0	1915.2	0	?	0	5.03	0.682	1	1	0	0.992	?	?	?	?	1001.3	8	13.193	12.148	11.747	11.212	9.873	8	8	8	8	8	8	8	221.425	0	0	0	0	0
								Medium_Lowland	PAN2423	0	1	2017-08-23	2017	rice	0	2049.1	0	?	0	15.09	0.701	1	1	0	0.992	?	?	?	?	1052.5	8	9.845	9.903	9.724	9.487	8.892	8	8	8	8	8	8	8	225.086	0	0	0	0	0
								Medium_Lowland	PAN2423	0	1	2017-08-24	2017	rice	0	2254.3	0	?	0	7.3	0.721	1	1	0	0.986	?	?	?	?	1126	8	10.034	10.551	10.319	10.01	9.237	8	8	8	8	8	8	8	219.407	0	0	0	0	0
								Medium_Lowland	PAN2423	0	1	2017-08-25	2017	rice	0	2453.6	0	?	0	4.43	0.741	1	1	0	0.993	?	?	?	?	1192.7	8	13.488	12.965	12.527	11.942	10.482	8	8	8	8	8	8	8	207.798	0	0	0	0	0
								Medium_Lowland	PAN2423	0	1	2017-08-26	2017	rice	0	2652.3	0	?	0	4.91	0.761	1	1	0	0.993	?	?	?	?	1254.4	8	12.772	12.368	11.994	11.495	10.247	8	8	8	8	8	8	8	197.714	0	0	0	0	0
								Medium_Lowland	PAN2423	0	1	2017-08-27	2017	rice	0	2833.3	0	?	0	12.2	0.781	1	1	0	0.993	?	?	?	?	1306.2	8	12.402	11.957	11.627	11.188	10.088	8	8	8	8	8	8	8	195.756	0	0	0	0	0
								Medium_Lowland	PAN2423	0	1	2017-08-28	2017	rice	0	3011.6	0	?	0	18.94	0.801	1	1	0	0.993	?	?	?	?	1353.1	8	11.413	11.208	10.947	10.601	9.734	8	8	8	8	8	8	8	201.613	0	0	0	0	0
								Medium_Lowland	PAN2423	0	1	2017-08-29	2017	rice	0	3182.4	0	?	0	13.35	0.821	1	1	0	0.993	?	?	?	?	1393.8	8	11.374	11.146	10.891	10.551	9.701	8	8	8	8	8	8	8	202.037	0	0	0	0	0
								Medium_Lowland	PAN2423	0	1	2017-08-30	2017	rice	0	3397	0	?	0	5.19	0.841	1	1	0	0.993	?	?	?	?	1439.8	8	10.785	10.967	10.726	10.405	9.604	8	8	8	8	8	8	8	194.209	0	0	0	0	0
								Medium_Lowland	PAN2423	0	1	2017-08-31	2017	rice	0	3566.8	0	?	0	4.63	0.861	1	1	0	0.993	?	?	?	?	1472.1	8	13.023	12.4	12.043	11.567	10.378	8	8	8	8	8	8	8	184.315	0	0	0	0	0
								Medium_Lowland	PAN2423	0	1	2017-09-01	2017	rice	0	3724.7	0	?	0	18.59	0.881	1	1	0	0.993	?	?	?	?	1498.3	8	11.083	10.861	10.629	10.319	9.546	8	8	8	8	8	8	8	190.499	0	0	0	0	0
								Medium_Lowland	PAN2423	0	1	2017-09-02	2017	rice	0	3943	0	?	0	50.29	0.901	1	1	0	0.993	?	?	?	?	1529.4	8	10.392	10.591	10.381	10.101	9.4	8	8	8	8	8	8	8	228.403	0	0	0	0	0
								Medium_Lowland	PAN2423	0	1	2017-09-03	2017	rice	0	4170	0	?	0	4.99	0.92	1	1	0	0.993	?	?	?	?	1556.5	8	11.963	12.003	11.679	11.246	10.164	8	8	8	8	8	8	8	218.884	0	0	0	0	0
								Medium_Lowland	PAN2423	0	1	2017-09-04	2017	rice	0	4399.6	0	?	0	1.03	0.94	1	1	0	0.991	?	?	?	?	1578.4	8	13.29	13.084	12.672	12.123	10.748	8	8	8	8	8	8	8	203.91	0	0	0	0	0
								Medium_Lowland	PAN2423	0	1	2017-09-05	2017	rice	0	4624.1	0	?	0	1.56	0.96	1	1	0	0.993	?	?	?	?	1594.7	8	13.817	13.373	12.937	12.357	10.904	8	8	8	8	8	8	8	189.238	0	0	0	0	0
								Medium_Lowland	PAN2423	0	1	2017-09-06	2017	rice	0	4848.3	113	?	0	2.87	0.98	1	1	0	0.991	?	?	?	?	1605.4	8	12.814	12.73	12.347	11.835	10.557	8	8	8	8	8	8	8	176.552	0	0	0	0	0
								Medium_Lowland	PAN2423	0	1	2017-09-07	2017	rice	0	5065.4	232.8	?	0	1.53	1	1	1	0	0.993	?	?	?	?	1610.6	8	13.8	13.436	12.995	12.407	10.938	8	8	8	8	8	8	8	161.662	0	0	0	0	0
								Medium_Lowland	PAN2423	0	1	2017-09-08	2017	rice	0	5251.6	377.3	?	0	2.07	1.03	1	1	0	0.993	?	?	?	?	1610.6	8	13.596	13.125	12.709	12.155	10.77	8	8	8	8	8	8	8	147.913	0	0	0	0	0
								Medium_Lowland	PAN2423	0	1	2017-09-09	2017	rice	0	5421.9	523.4	?	0	7.01	1.06	1	1	0	0.993	?	?	?	?	1610.6	8	12.666	12.303	11.954	11.489	10.326	8	8	8	8	8	8	8	140.317	0	0	0	0	0
								Medium_Lowland	PAN2423	0	1	2017-09-10	2017	rice	0	5593.1	680.7	?	0	3.62	1.09	1	1	0	0.993	?	?	?	?	1610.6	8	11.685	11.744	11.44	11.035	10.024	8	8	8	8	8	8	8	129.805	0	0	0	0	0
								Medium_Lowland	PAN2423	0	1	2017-09-11	2017	rice	0	5748.4	836.2	?	0	13.2	1.12	1	1	0	0.993	?	?	?	?	1610.6	8	13.181	12.785	12.397	11.88	10.587	8	8	8	8	8	8	8	127.625	0	0	0	0	0
								Medium_Lowland	PAN2423	0	1	2017-09-12	2017	rice	0	5892.7	991.4	?	0	8.64	1.151	1	1	0	0.993	?	?	?	?	1610.6	8	12.393	12.198	11.857	11.404	10.269	8	8	8	8	8	8	8	121.625	0	0	0	0	0
								Medium_Lowland	PAN2423	0	1	2017-09-13	2017	rice	0	6028.4	1146.8	?	0	8.33	1.181	1	1	0	0.993	?	?	?	?	1610.6	8	12.511	12.3	11.951	11.486	10.324	8	8	8	8	8	8	8	115.151	0	0	0	0	0
								Medium_Lowland	PAN2423	0	1	2017-09-14	2017	rice	0	6153.3	1299.2	?	0	3.12	1.21	1	1	0	0.993	?	?	?	?	1610.6	8	12.493	12.359	12.005	11.534	10.356	8	8	8	8	8	8	8	103.282	0	0	0	0	0
								Medium_Lowland	PAN2423	0	1	2017-09-15	2017	rice	0	6267.3	1443.4	?	0	2.87	1.241	0.954	0.996	0	0.993	?	?	?	?	1610.6	8	12.956	12.732	12.348	11.836	10.558	8	8	8	8	8	8	8	90.626	0	0	0	0	0
								Medium_Lowland	PAN2423	0	1	2017-09-16	2017	rice	0	6372.7	1576	?	0	0.66	1.27	0.954	0.996	0	0.99	?	?	?	?	1610.6	8	12.966	12.823	12.432	11.911	10.607	8	8	8	8	8	8	8	75.511	0	0	0	0	0
								Medium_Lowland	PAN2423	0	1	2017-09-17	2017	rice	0	6391.5	1619.4	?	0	21.01	1.298	0.954	0.996	0	1	?	?	?	?	1610.6	8	14.303	13.25	12.825	12.257	10.838	8	8	8	8	8	8	8	81.265	0	0	0	0	0
								Medium_Lowland	PAN2423	0	1	2017-09-18	2017	rice	0	6487.4	1737.3	?	0	16.1	1.329	0.954	0.996	0	0.993	?	?	?	?	1610.6	8	8.432	8.937	8.861	8.76	8.507	8	8	8	8	8	8	8	86.986	0	0	0	0	0
								Medium_Lowland	PAN2423	0	1	2017-09-19	2017	rice	0	6555.7	1825.4	?	0	15.98	1.359	0.954	0.996	0	0.993	?	?	?	?	1610.6	8	13.104	12.344	11.992	11.522	10.348	8	8	8	8	8	8	8	88.544	0	0	0	0	0
								Medium_Lowland	PAN2423	0	1	2017-09-20	2017	rice	0	6619.3	1907	?	0	23.2	1.389	0.954	0.996	0	0.993	?	?	?	?	1610.6	8	10.45	10.299	10.112	9.864	9.242	8	8	8	8	8	8	8	100.086	0	0	0	0	0
								Medium_Lowland	PAN2423	0	1	2017-09-21	2017	rice	0	6688.9	1992.7	?	0	3.71	1.42	0.954	0.996	0	0.993	?	?	?	?	1610.6	8	9.977	10.175	9.998	9.763	9.175	8	8	8	8	8	8	8	91.984	0	0	0	0	0
								Medium_Lowland	PAN2423	0	1	2017-09-22	2017	rice	0	6753.8	2071.9	?	0	1.65	1.451	0.954	0.996	0	0.993	?	?	?	?	1610.6	8	11.295	11.341	11.07	10.709	9.806	8	8	8	8	8	8	8	80.021	0	0	0	0	0
								Medium_Lowland	PAN2423	0	1	2017-09-23	2017	rice	0	6813.4	2144.6	?	0	0.24	1.481	0.954	0.996	0	0.992	?	?	?	?	1610.6	8	12.227	12.154	11.817	11.368	10.245	8	8	8	8	8	8	8	65.391	0	0	0	0	0
								Medium_Lowland	PAN2423	0	1	2017-09-24	2017	rice	0	6863.2	2206.1	?	0	0.87	1.511	0.954	0.996	0	0.99	?	?	?	?	1610.6	8	12.869	12.675	12.296	11.79	10.527	8	8	8	8	8	8	8	50.617	0	0	0	0	0
								Medium_Lowland	PAN2423	0	1	2017-09-25	2017	rice	0	6906.3	2259.8	?	0	1.28	1.54	0.954	0.996	0	0.993	?	?	?	?	1610.6	8	13.258	12.844	12.451	11.928	10.618	8	8	8	8	8	8	8	36.165	0	0	0	0	0
								Medium_Lowland	PAN2423	0	1	2017-09-26	2017	rice	0	6944.1	2307.1	?	0	0.64	1.57	0.954	0.996	0	0.993	?	?	?	?	1610.6	8	12.464	12.203	11.862	11.407	10.272	8	8	8	8	8	8	8	21.953	0	0	0	0	0
								Medium_Lowland	PAN2423	0	1	2017-09-27	2017	rice	0	6974.6	2346.2	?	0	9.57	1.6	0.954	0.996	0	0.993	?	?	?	?	1610.6	8	12.644	11.961	11.64	11.212	10.141	8	8	8	8	8	8	8	17.435	0	0	0	0	0
								Medium_Lowland	PAN2423	0	1	2017-09-28	2017	rice	0	7004.2	2383.4	?	0	9.92	1.63	0.954	0.996	0	0.993	?	?	?	?	1610.6	8	10.094	10.261	10.078	9.834	9.222	8	8	8	8	8	8	8	15.283	0	0	0	0	0
								Medium_Lowland	PAN2423	0	1	2017-09-29	2017	rice	0	7023.1	2409.2	?	0	16.46	1.66	0.954	0.996	0	0.997	?	?	?	?	1610.6	8	11.703	11.145	10.89	10.55	9.7	8	8	8	8	8	8	8	18.966	0	0	0	0	0
								Medium_Lowland	PAN2423	0	1	2017-09-30	2017	rice	0	7040.1	2432.5	?	0	10.67	1.69	0.954	0.996	0	0.995	?	?	?	?	1610.6	8	9.402	9.33	9.222	9.078	8.719	8	8	8	8	8	8	8	19.289	0	0	0	0	0
								Medium_Lowland	PAN2423	0	1	2017-10-01	2017	rice	0	7042.9	2440.9	?	0	21.05	1.719	0.954	0.996	0	1	?	?	?	?	1610.6	8	9.593	9.511	9.388	9.225	8.817	8	8	8	8	8	8	8	30.047	0	0	0	0	0
								Medium_Lowland	PAN2423	0	1	2017-10-02	2017	rice	0	7062.6	2465.6	?	0	7.15	1.75	0.954	0.996	0	0.993	?	?	?	?	1610.6	8	8.152	8.498	8.458	8.404	8.269	8	8	8	8	8	8	8	27.548	0	0	0	0	0
								Medium_Lowland	PAN2423	0	1	2017-10-03	2017	rice	0	7077.9	2485.5	?	0	2.18	1.779	0.954	0.996	0	0.993	?	?	?	?	1610.6	8	11.111	10.695	10.477	10.185	9.457	8	8	8	8	8	8	8	17.199	0	0	0	0	0
								Medium_Lowland	PAN2423	0	1	2017-10-04	2017	rice	0	7092.1	2503.8	?	0	0.27	1.809	0.954	0.996	0	0.993	?	?	?	?	1610.6	8	9.415	9.848	9.698	9.498	8.999	8	8	8	8	8	8	8	5.594	0	0	0	0	0
								Medium_Lowland	PAN2423	0	1	2017-10-05	2017	rice	0	7102.3	2517.6	?	0	2.31	1.839	0.954	0.996	0	0.998	?	?	?	?	1610.6	6.96	7.248	6.442	6.184	5.841	4.983	4.8	6.96	6.96	6.96	6.96	6.96	6.96	0	0	0	0	0	0
								Medium_Lowland	PAN2423	0	1	2017-10-06	2017	rice	0	7114.3	2533	?	0	1.35	1.869	0.954	0.996	0	0.993	?	?	?	?	1610.6	6.96	0.837	0.832	0.855	1.14	2.5	4.8	6.96	6.96	6.96	6.96	6.96	6.96	0	0	0	0	0	0
								Medium_Lowland	PAN2423	0	1	2017-10-07	2017	rice	0	7161.1	2582.8	?	0	9.83	1.899	0.954	0.996	0	1	?	?	?	?	1610.6	6.96	9.193	8.978	8.625	7.9	5.442	4.564	6.96	6.96	6.96	6.96	6.96	6.96	0	0	0	0	0	0
								Medium_Lowland	PAN2423	0	1	2017-10-08	2017	rice	0	7224	2648.3	?	0	36.4	1.929	0.954	0.996	0	0.999	?	?	?	?	1610.6	6.96	18.284	18.226	18.139	18.023	17.733	12	6.96	6.96	6.96	6.96	6.96	6.96	0	0	0	0	0	0
								Medium_Lowland	PAN2423	0	1	2017-10-09	2017	rice	0	7250.6	2677.4	?	0	84.81	1.958	0.954	0.996	0	1	?	?	?	?	1610.6	8	10.883	10.821	10.728	10.604	10.295	9.676	8	8	8	8	8	8	0	0	0	0	0	0
								Medium_Lowland	PAN2423	0	1	2017-10-10	2017	rice	0	7337.7	2766.6	?	0	14.42	1.987	0.954	0.996	0.4	0.993	?	?	?	?	1610.6	8	8.417	8.402	8.369	8.326	8.217	8	8	8	8	8	8	8	0	0	0	0	0	0
								Medium_Lowland	PAN2423	0	1	2017-10-11	2017	rice	0	7431.9	2862.8	?	0	2.29	2.017	0.954	0.996	0.968	0.993	?	?	?	?	1610.6	6.96	1.458	1.575	1.435	1.249	2.5	4.8	6.96	6.96	6.96	6.96	6.96	6.96	0	0	0	0	0	0
								Medium_Lowland	PAN2423	0	1	2017-10-12	2017	rice	0	7522	2954.6	?	0	0.43	2.047	0.954	0.996	1	0.972	?	?	?	?	1610.6	6.96	-0.364	0.497	0.855	1.14	1.924	3.816	6.96	6.96	6.96	6.96	6.96	6.96	0	0	0	0	0	0
								Medium_Lowland	PAN2423	0	1	2017-10-13	2017	rice	0	7610.1	3044.3	?	0	3.75	2.077	0.954	0.996	1	0.925	?	?	?	?	1610.6	5.792	2.863	1.802	1.116	1.14	1.273	2.385	5.792	5.792	5.792	5.792	5.792	5.792	0	0	0	0	0	0
								Medium_Lowland	PAN2423	0	1	2017-10-14	2017	rice	0	7691	3126.7	?	0	3.81	2.107	0.954	0.996	1	0.889	?	?	?	?	1610.6	4.09	3.012	2.854	2.703	1.756	1.264	1.536	4.09	4.09	4.09	4.09	4.09	4.09	0	0	0	0	0	0
								Medium_Lowland	PAN2423	0	1	2017-10-15	2017	rice	0	7772.9	3209.8	?	0	0.17	2.136	0.954	0.996	1	0.836	?	?	?	?	1610.6	4.05	-0.684	0.47	0.855	1.14	0.987	0.973	2.843	4.05	4.05	4.05	4.05	4.05	0	0	0	0	0	0
								Medium_Lowland	PAN2423	0	1	2017-10-16	2017	rice	0	7853.5	3291.6	?	0	0.05	2.164	0.954	0.996	1	0.778	?	?	?	?	1610.6	4.05	-0.624	-0.805	0.522	1.071	0.776	0.488	1.901	4.05	4.05	4.05	4.05	4.05	0	0	0	0	0	0
								Medium_Lowland	PAN2423	0	1	2017-10-17	2017	rice	0	7933.2	3372.3	?	0	0.44	2.192	0.954	0.996	1	0.712	?	?	?	?	1610.6	4.05	-0.645	-0.388	-0.643	0.438	0.364	0.049	1.16	3.391	4.05	4.05	4.05	4.05	0	0	0	0	0	0
								Medium_Lowland	PAN2423	0	1	2017-10-18	2017	rice	0	8011.6	3451.6	?	0	6.84	2.22	0.954	0.996	1	0.778	?	?	?	?	1610.6	4.05	5.297	3.961	1.938	0.774	0.624	-0.166	0.696	2.583	4.05	4.05	4.05	4.05	0	0	0	0	0	0
								Medium_Lowland	PAN2423	0	1	2017-10-19	2017	rice	0	8078.1	3519	?	0	40.93	2.249	0.954	0.996	1	0.993	?	?	?	?	1610.6	4.05	32.54	32.145	32.013	30.332	24.943	12	5.151	3.353	4.05	4.05	4.05	4.05	0	0	0	0	0	0
								Medium_Lowland	PAN2423	0	1	2017-10-20	2017	rice	0	8093.8	3535.5	?	0	45.99	2.279	0.954	0.996	1	1	?	?	?	?	1610.6	4.05	13.266	13.063	12.977	12.862	12.575	12	6.96	4.05	4.05	4.05	4.05	4.05	0	0	0	0	0	0
								Medium_Lowland	PAN2423	0	1	2017-10-21	2017	rice	0	8128.3	3570.7	?	0	53.2	2.307	0.954	0.996	1	1	?	?	?	?	1610.6	4.05	12.221	12.209	12.192	12.17	12.113	12	7.367	4.602	4.05	4.05	4.05	4.05	0	0	0	0	0	0
								Medium_Lowland	PAN2423	0	1	2017-10-22	2017	rice	0	8202.3	3645.3	?	0	0.37	2.334	0.954	0.996	1	0.976	?	?	?	?	1610.6	4.689	-0.656	0.57	0.855	1.14	2.5	4.8	6.96	6.96	4.689	4.689	4.689	4.689	0	0	0	0	0	0
								Medium_Lowland	PAN2423	0	1	2017-10-23	2017	rice	0	8274.2	3717.7	?	0	0.06	2.362	0.954	0.996	1	0.944	?	?	?	?	1610.6	6.96	-0.832	-0.863	0.63	1.14	2.114	4.284	6.96	6.96	6.96	6.96	6.96	6.96	0	0	0	0	0	0
								Medium_Lowland	PAN2423	0	1	2017-10-24	2017	rice	0	8342.6	3786.6	?	0	1	2.389	0.954	0.996	1	0.856	?	?	?	?	1610.6	6.103	-0.457	-0.276	-0.585	0.55	1.128	2.694	6.103	6.103	6.103	6.103	6.103	6.103	0	0	0	0	0	0
								Medium_Lowland	PAN2423	0	1	2017-10-25	2017	rice	0	8408.1	3852.6	?	0	4.26	2.418	0.954	0.996	1	0.844	?	?	?	?	1610.6	4.273	2.712	1.651	0.746	0.281	0.519	1.527	4.273	4.273	4.273	4.273	4.273	4.273	0	0	0	0	0	0
								Medium_Lowland	PAN2423	0	1	2017-10-26	2017	rice	0	8472.7	3917.6	?	0	0.39	2.446	0.954	0.996	1	0.774	?	?	?	?	1610.6	4.05	-0.591	0.335	0.492	0.322	0.259	0.762	2.868	4.05	4.05	4.05	4.05	4.05	0	0	0	0	0	0
								Medium_Lowland	PAN2423	0	1	2017-10-27	2017	rice	0	8537.9	3983.1	?	0	0.02	2.472	0.954	0.996	1	0.709	?	?	?	?	1610.6	4.05	-0.861	-0.889	0.2	0.199	0.075	0.241	1.817	4.05	4.05	4.05	4.05	4.05	0	0	0	0	0	0
								Medium_Lowland	PAN2423	0	1	2017-10-28	2017	rice	0	8601.2	4046.7	?	0	0	2.499	0.954	0.996	1	0.665	?	?	?	?	1610.6	4.05	-1.083	-0.656	-0.827	-0.43	-0.065	-0.216	1.09	3.353	4.05	4.05	4.05	4.05	0	0	0	0	0	0
								Medium_Lowland	PAN2423	0	1	2017-10-29	2017	rice	0	8660	4105.9	?	0	0.05	2.525	0.954	0.996	1	0.637	?	?	?	?	1610.6	4.05	-0.748	-0.773	-0.649	-0.482	-0.171	-0.201	0.568	2.517	4.05	4.05	4.05	4.05	0	0	0	0	0	0
								Medium_Lowland	PAN2423	0	1	2017-10-30	2017	rice	0	8709.6	4155.7	?	0	1.13	2.551	0.954	0.996	1	0.63	?	?	?	?	1610.6	4.05	-0.024	-0.267	-0.368	-0.312	-0.187	-0.201	0.26	1.84	3.933	4.05	4.05	4.05	0	0	0	0	0	0
								Medium_Lowland	PAN2423	0	1	2017-10-31	2017	fallow	0	0	0	?	0	0.03	0	1	1	1	1	?	?	?	?	0	4.05	-0.982	-0.738	-0.555	-0.442	-0.22	-0.204	0.076	1.311	3.147	4.05	4.05	4.05	0	0	0	0	0	0
								Medium_Lowland	PAN2423	0	1	2017-11-01	2017	fallow	0	0	0	?	0	0	0	1	1	1	1	?	?	?	?	0	4.05	-0.901	-0.762	-0.625	-0.453	-0.253	-0.195	-0.285	0.918	2.478	4.05	4.05	4.05	0	0	0	0	0	0
								Medium_Lowland	PAN2423	0	1	2017-11-02	2017	fallow	0	0	0	?	0	0	0	1	1	1	1	?	?	?	?	0	4.05	-0.855	-0.763	-0.63	-0.461	-0.275	-0.204	0	0.557	1.902	3.843	4.05	4.05	0	0	0	0	0	0
								Medium_Lowland	PAN2423	0	1	2017-11-03	2017	fallow	0	0	0	?	0	0	0	1	1	1	1	?	?	?	?	0	4.05	-0.824	-0.747	-0.624	-0.462	-0.291	-0.197	-0.221	0.39	1.448	3.124	4.05	4.05	0	0	0	0	0	0
								Medium_Lowland	PAN2423	0	1	2017-11-04	2017	fallow	0	0	0	?	0	0	0	1	1	1	1	?	?	?	?	0	4.05	-0.798	-0.729	-0.615	-0.46	-0.3	-0.204	-0.198	0.207	1.076	2.51	4.05	4.05	0	0	0	0	0	0
								Medium_Lowland	PAN2423	0	1	2017-11-05	2017	fallow	0	0	0	?	0	0.03	0	1	1	1	1	?	?	?	?	0	3.845	-0.775	-0.711	-0.603	-0.456	-0.307	-0.209	-0.185	0.085	0.778	1.99	3.845	3.845	0	0	0	0	0	0
								Medium_Lowland	PAN2423	0	1	2017-11-06	2017	fallow	0	0	0	?	0	0.01	0	1	1	1	1	?	?	?	?	0	3.159	-0.73	-0.652	-0.568	-0.445	-0.311	-0.213	-0.176	0.004	0.546	1.557	3.159	3.159	0	0	0	0	0	0
								Medium_Lowland	PAN2423	0	1	2017-11-07	2017	fallow	0	0	0	?	0	0	0	1	1	1	1	?	?	?	?	0	2.573	-0.66	-0.592	-0.527	-0.431	-0.313	-0.216	-0.169	0	0.382	1.205	2.573	2.573	0	0	0	0	0	0
								Medium_Lowland	PAN2423	0	1	2017-11-08	2017	fallow	0	0	0	?	0	0	0	1	1	1	1	?	?	?	?	0	2.078	-0.602	-0.549	-0.473	-0.414	-0.313	-0.218	-0.163	0	0.268	0.924	2.078	2.078	0	0	0	0	0	0
								Medium_Lowland	PAN2423	0	1	2017-11-09	2017	fallow	0	0	0	?	0	0	0	1	1	1	1	?	?	?	?	0	1.665	-0.558	-0.502	-0.446	-0.398	-0.312	-0.219	-0.157	0	0.187	0.703	1.665	1.665	0	0	0	0	0	0
								Medium_Lowland	PAN2423	0	1	2017-11-10	2017	fallow	0	0	0	?	0	0	0	1	1	1	1	?	?	?	?	0	1.35	-0.518	-0.47	-0.425	-0.386	-0.309	-0.22	-0.151	0	0.131	0.531	1.325	1.35	0	0	0	0	0	0
								Medium_Lowland	PAN2423	0	1	2017-11-11	2017	fallow	0	0	0	?	0	0	0	1	1	1	1	?	?	?	?	0	1.35	-0.488	-0.446	-0.409	-0.375	-0.306	-0.22	-0.147	0	0.092	0.399	1.047	1.35	0	0	0	0	0	0
								Medium_Lowland	PAN2423	0	1	2017-11-12	2017	fallow	0	0	0	?	0	0	0	1	1	1	1	?	?	?	?	0	1.35	-0.463	-0.427	-0.396	-0.365	-0.303	-0.22	-0.142	0	0.064	0.299	0.823	1.35	0	0	0	0	0	0
								Medium_Lowland	PAN2423	0	1	2017-11-13	2017	fallow	0	0	0	?	0	0	0	1	1	1	1	?	?	?	?	0	1.286	-0.442	-0.412	-0.384	-0.357	-0.3	-0.219	-0.138	0	0.045	0.223	0.643	1.286	0	0	0	0	0	0
								Medium_Lowland	PAN2423	0	1	2017-11-14	2017	fallow	0	0	0	?	0	1.87	0	1	1	1	1	?	?	?	?	0	1.05	-0.425	-0.399	-0.374	-0.349	-0.297	-0.218	-0.135	0	0.031	0.165	0.5	1.05	0	0	0	0	0	0
								Medium_Lowland	PAN2423	0	1	2017-11-15	2017	fallow	0	0	0	?	0	24.74	0	1	1	1	1	?	?	?	?	0	0.851	22.97	19.872	16.034	11.513	2.896	0.049	-0.124	0	0.022	0.122	0.386	0.851	0	0	0	0	0	0
								Medium_Lowland	PAN2423	0	1	2017-11-16	2017	fallow	0	0	0	?	0	5.85	0	1	1	1	1	?	?	?	?	0	0.685	4.567	5.268	5.268	5.268	5.268	2.136	0.606	0	0.015	0.09	0.298	0.685	0	0	0	0	0	0
								Medium_Lowland	PAN2423	0	1	2017-11-17	2017	fallow	0	0	0	?	0	2.67	0	1	1	1	1	?	?	?	?	0	0.549	1.178	1.387	1.387	1.387	2.5	2.282	1.276	0.117	0.046	0.077	0.231	0.549	0	0	0	0	0	0
								Medium_Lowland	PAN2423	0	1	2017-11-18	2017	fallow	0	0	0	?	0	3.98	0	1	1	1	1	?	?	?	?	0	0.443	1.805	2.488	2.488	2.488	2.5	2.369	1.713	0.596	0.211	0.117	0.197	0.443	0	0	0	0	0	0
								Medium_Lowland	PAN2423	0	1	2017-11-19	2017	fallow	0	0	0	?	0	0.22	0	1	1	1	1	?	?	?	?	0	0.371	-1.087	-1.267	0.855	1.14	2.5	2.421	1.997	1.016	0.453	0.218	0.203	0.371	0	0	0	0	0	0
								Medium_Lowland	PAN2423	0	1	2017-11-20	2017	fallow	0	0	0	?	0	0.01	0	1	1	1	1	?	?	?	?	0	0.336	-0.967	-0.58	-0.983	0.997	1.756	2.155	2.06	1.329	0.716	0.367	0.252	0.336	0	0	0	0	0	0
								Medium_Lowland	PAN2423	0	1	2017-11-21	2017	fallow	0	0	0	?	0	0.01	0	1	1	1	1	?	?	?	?	0	0.337	-0.614	-0.761	-0.432	0.007	0.882	1.646	1.894	1.499	0.951	0.542	0.339	0.337	0	0	0	0	0	0
								Medium_Lowland	PAN2423	0	1	2017-11-22	2017	fallow	0	0	0	?	0	0	0	1	1	1	1	?	?	?	?	0	0.372	-0.609	-0.538	-0.307	-0.609	0.441	1.164	1.602	1.53	1.124	0.717	0.453	0.372	0	0	0	0	0	0
								Medium_Lowland	PAN2423	0	1	2017-11-23	2017	fallow	0	0	0	?	0	0	0	1	1	1	1	?	?	?	?	0	0.433	-0.493	-0.419	-0.5	-0.357	-0.237	0.698	1.241	1.443	1.22	0.868	0.577	0.433	0	0	0	0	0	0
								Medium_Lowland	PAN2423	0	1	2017-11-24	2017	fallow	0	0	0	?	0	0	0	1	1	1	1	?	?	?	?	0	0.513	-0.423	-0.454	-0.412	-0.362	-0.175	0.324	0.874	1.272	1.236	0.978	0.697	0.513	0	0	0	0	0	0
								Medium_Lowland	PAN2423	0	1	2017-11-25	2017	fallow	0	0	0	?	0	0	0	1	1	1	1	?	?	?	?	0	0.599	-0.412	-0.412	-0.391	-0.329	-0.168	0.125	0.574	1.063	1.184	1.04	0.8	0.599	0	0	0	0	0	0
								Medium_Lowland	PAN2423	0	1	2017-11-26	2017	fallow	0	0	0	?	0	0	0	1	1	1	1	?	?	?	?	0	0.682	-0.38	-0.384	-0.361	-0.306	-0.175	0.008	0.348	0.848	1.083	1.053	0.876	0.682	0	0	0	0	0	0
								Medium_Lowland	PAN2423	0	1	2017-11-27	2017	fallow	0	0	0	?	0	0	0	1	1	1	1	?	?	?	?	0	0.753	-0.356	-0.358	-0.336	-0.29	-0.176	-0.127	0.209	0.656	0.955	1.024	0.92	0.753	0	0	0	0	0	0
								Medium_Lowland	PAN2423	0	1	2017-11-28	2017	fallow	0	0	0	?	0	0	0	1	1	1	1	?	?	?	?	0	0.807	-0.335	-0.335	-0.316	-0.276	-0.192	-0.119	0.074	0.482	0.813	0.96	0.932	0.807	0	0	0	0	0	0
								Medium_Lowland	PAN2423	0	1	2017-11-29	2017	fallow	0	0	0	?	0	0	0	1	1	1	1	?	?	?	?	0	0.839	-0.317	-0.317	-0.299	-0.269	-0.198	-0.118	-0.125	0.337	0.67	0.873	0.915	0.839	0	0	0	0	0	0
								Medium_Lowland	PAN2423	0	1	2017-11-30	2017	fallow	0	0	0	?	0	0	0	1	1	1	1	?	?	?	?	0	0.849	-0.302	-0.301	-0.287	-0.262	-0.201	-0.124	0	0.198	0.529	0.77	0.871	0.849	0	0	0	0	0	0
								Medium_Lowland	PAN2423	40	2	2016-06-01	2016	?	0	0	0	?	0	9.92	0	1	1	1	1	?	?	?	?	0	0.001	7.705	8.21	6.5	4.22	2.11	0.844	0.338	0.101	0.03	0.009	0.003	0.001	0	91.8	277.4	300.9	221	115.2
								Medium_Lowland	PAN2423	40	2	2016-06-02	2016	?	0	0	0	?	0	6.46	0	1	1	1	1	?	?	?	?	0	0.005	3.99	3.99	3.99	3.99	2.5	1.506	0.805	0.312	0.115	0.041	0.014	0.005	0	29.9	98.4	165.2	201.2	135.6
								Medium_Lowland	PAN2423	40	2	2016-06-03	2016	?	0	0	0	?	0	5.3	0	1	1	1	1	?	?	?	?	0	0.016	2.83	2.83	2.83	2.83	2.5	1.904	1.245	0.592	0.258	0.106	0.042	0.016	0	16.3	55.1	106.6	137.8	134.8
								Medium_Lowland	PAN2423	40	2	2016-06-04	2016	?	0	0	0	?	0	5.23	0	1	1	1	1	?	?	?	?	0	0.039	2.76	2.76	2.76	2.76	2.5	2.142	1.604	0.896	0.449	0.209	0.092	0.039	0	14.2	43.1	93.8	129.1	133.7
								Medium_Lowland	PAN2423	40	2	2016-06-05	2016	?	0	0	0	?	0	6.79	0	1	1	1	1	?	?	?	?	0	0.078	4.32	4.32	4.32	4.32	3.51	2.689	2.038	1.238	0.686	0.352	0.17	0.078	0	19.1	49.8	123.5	187	184.6
								Medium_Lowland	PAN2423	40	2	2016-06-06	2016	?	0	0	0	?	0	8.33	0	1	1	1	1	?	?	?	?	0	0.139	5.948	5.86	5.86	5.86	5.86	3.958	2.806	1.709	0.993	0.544	0.282	0.139	0	17.8	45.4	131	223.9	298.4
								Medium_Lowland	PAN2423	40	2	2016-06-07	2016	?	0	0	0	?	0	5.57	0	1	1	1	1	?	?	?	?	0	0.227	3.356	3.232	3.232	3.232	3.232	3.667	3.15	2.141	1.337	0.782	0.432	0.227	0	6.9	19.4	62.2	114.3	161.2
								Medium_Lowland	PAN2423	40	2	2016-06-08	2016	?	0	0	0	?	0	4.23	0	1	1	1	1	?	?	?	?	0	0.344	1.866	2.077	2.077	2.077	2.5	3.2	3.17	2.45	1.671	1.049	0.617	0.344	0	1.9	10.4	36.1	69.6	122.9
								Medium_Lowland	PAN2423	40	2	2016-06-09	2016	?	0	0	0	?	0	3.43	0	1	1	1	1	?	?	?	?	0	0.49	0.96	0.96	0.96	1.14	2.5	2.92	3.07	2.636	1.961	1.322	0.829	0.49	0	0.4	4.3	15.9	37.2	121.9
								Medium_Lowland	PAN2423	40	2	2016-06-10	2016	?	0	0	0	?	0	2.7	0	1	1	1	1	?	?	?	?	0	0.659	0.343	0.57	0.855	1.14	2.179	2.624	2.892	2.713	2.186	1.582	1.055	0.659	0	-0.4	2.4	13.7	36.4	105.3
								Medium_Lowland	PAN2423	40	2	2016-06-11	2016	?	0	0	0	?	0	2.24	0	1	1	1	1	?	?	?	?	0	0.846	-0.058	0.285	0.855	1.14	1.659	2.238	2.63	2.688	2.337	1.808	1.281	0.846	0	-0.9	1.2	13.5	35.6	79.4
								Medium_Lowland	PAN2423	40	2	2016-06-12	2016	?	0	0	0	?	0	8.4	0	1	1	1	1	?	?	?	?	0	1.04	5.645	5.075	4.22	3.47	2.5	2.343	2.515	2.636	2.427	1.994	1.495	1.04	0	8.8	15.2	51.3	95.4	115.8
								Medium_Lowland	PAN2423	40	2	2016-06-13	2016	?	0	0	0	?	0	21.37	0	1	1	1	1	?	?	?	?	0	1.24	19.53	18.72	18.72	18.72	16.349	7.863	4.655	3.242	2.671	2.197	1.705	1.24	0	10.1	22.5	109.3	309.6	608.5
								Medium_Lowland	PAN2423	40	2	2016-06-14	2016	?	0	0	0	?	0	10.75	0	1	1	1	1	?	?	?	?	0	1.35	8.535	9.346	9.346	9.346	9.346	9.346	6.531	4.05	3.085	2.463	1.933	1.35	0	1.3	6.3	35	114.1	307.6
								Medium_Lowland	PAN2423	40	2	2016-06-15	2016	?	0	0	0	?	0	7.46	0	1	1	1	1	?	?	?	?	0	1.35	4.99	4.99	4.99	4.99	4.99	4.99	5.915	4.05	3.374	2.737	2.174	1.35	0	0.6	2.2	14.3	50.9	152.9
								Medium_Lowland	PAN2423	40	2	2016-06-16	2016	?	0	0	0	?	0	2.91	0	1	1	1	1	?	?	?	?	0	2.218	0.483	0.57	0.855	1.14	2.5	4.8	5.469	4.05	3.577	2.989	2.418	2.218	0	-0.1	0.2	2.4	11.3	75.3
								Medium_Lowland	PAN2423	40	2	2016-06-17	2016	?	0	0	0	?	0	9.94	0	1	1	1	1	?	?	?	?	0	2.682	7.427	7.34	7.055	6.77	5.41	4.8	5.201	5.029	4.013	3.296	2.682	2.682	0	0.8	1.9	13.2	51.6	146.7
								Medium_Lowland	PAN2423	40	2	2016-06-18	2016	?	0	0	0	?	0	6.62	0	1	1	1	1	?	?	?	?	0	2.934	4.15	4.15	4.15	4.15	4.15	4.8	5.041	5.041	4.05	3.522	2.934	2.934	0	0.3	0.8	6.2	26.9	105.3
								Medium_Lowland	PAN2423	40	2	2016-06-19	2016	?	0	0	0	?	0	4.81	0	1	1	1	1	?	?	?	?	0	3.158	2.34	2.34	2.34	2.34	2.5	4.8	4.944	4.944	4.05	3.68	3.158	3.158	0	0.1	0.4	3	13.8	61
								Medium_Lowland	PAN2423	40	2	2016-06-20	2016	?	0	0	0	?	0	1.92	0	1	1	1	1	?	?	?	?	0	3.348	-0.268	0.295	0.855	1.14	2.5	3.944	4.544	4.544	4.05	3.791	3.348	3.348	0	-0.1	0	1.1	6.5	59.9
								Medium_Lowland	PAN2423	40	2	2016-06-21	2016	?	0	0	0	?	0	0.79	0	1	1	1	1	?	?	?	?	0	3.504	-0.824	-1.359	0.575	1.14	2.31	3.29	4.043	4.05	4.05	3.869	3.504	3.504	0	-0.3	-1.7	0.7	6.3	54.2
								Medium_Lowland	PAN2423	40	2	2016-06-22	2016	?	0	0	0	?	0	0.58	0	1	1	1	1	?	?	?	?	0	3.63	-1.087	-0.652	-1.115	0.715	1.512	2.579	3.457	4.05	4.05	3.923	3.63	3.63	0	-0.5	-1.2	-6.2	4	35.1
								Medium_Lowland	PAN2423	40	2	2016-06-23	2016	?	0	0	0	?	0	2.19	0	1	1	1	1	?	?	?	?	0	3.729	-0.404	-0.689	-0.393	-0.743	0.756	1.85	2.814	4.05	4.05	3.961	3.729	3.729	0	-0.5	-1.3	-2.6	-17.2	17.5
								Medium_Lowland	PAN2423	40	2	2016-06-24	2016	?	0	0	0	?	0	2.03	0	1	1	1	1	?	?	?	?	0	3.807	-0.508	-0.462	-0.583	-0.414	0.007	1.113	2.134	4.05	4.05	3.988	3.807	3.807	0	-0.5	-1.1	-4	-9.6	0.2
								Medium_Lowland	PAN2423	40	2	2016-06-25	2016	?	0	0	0	?	0	0.56	0	1	1	1	1	?	?	?	?	0	3.867	-1.016	-0.842	-0.659	-0.471	-0.32	0.668	1.547	3.389	4.05	4.007	3.867	3.867	0	-0.9	-2.1	-4.9	-11.1	-13.7
								Medium_Lowland	PAN2423	40	2	2016-06-26	2016	?	0	0	0	?	0	6.18	0	1	1	1	1	?	?	?	?	0	3.913	3.09	2.692	0.855	0.519	0	0.273	1.037	2.683	4.05	4.02	3.913	3.913	0	0.8	1.7	1.7	3.6	0
								Medium_Lowland	PAN2423	40	2	2016-06-27	2016	?	0	0	0	?	0	8.83	0	1	1	1	1	?	?	?	?	0	3.904	6.36	6.36	5.808	3.456	1.709	0.847	0.961	2.167	3.564	3.883	3.904	3.904	0	1.1	2.6	8.6	19	37.1
								Medium_Lowland	PAN2423	40	2	2016-06-28	2016	?	0	0	0	?	30	8.51	0	1	1	1	1	?	?	?	?	0	3.857	26.021	26.021	26.021	26.021	22.73	12	5.377	3.13	3.434	3.748	3.857	3.857	4.987	1.2	3.4	15.5	68.2	326.9
								Medium_Lowland	PAN2423	40	2	2016-06-29	2016	?	0	0	0	?	0	4.34	0	1	1	1	1	?	?	?	?	0	3.811	6.857	6.857	6.857	6.857	6.857	6.857	5.969	3.981	3.598	3.703	3.811	3.811	0	0.2	0.5	2.9	13.9	87.4
								Medium_Lowland	PAN2423	40	2	2016-06-30	2016	?	0	0	0	?	0	3.28	0	1	1	1	1	?	?	?	?	0	3.781	0.81	0.81	0.855	1.14	2.5	4.8	5.501	4.05	3.734	3.712	3.781	3.781	0	0	0.1	0.3	2.2	31.2
								Medium_Lowland	PAN2423	40	2	2016-07-01	2016	?	0	0	0	?	0	9.47	0	1	1	1	1	?	?	?	?	0	3.771	7	7	6.955	6.67	5.31	4.8	5.221	4.05	3.829	3.747	3.771	3.771	0	0.1	0.3	2	9.9	58.5
								Medium_Lowland	PAN2423	40	2	2016-07-02	2016	rice	0	3.8	0	?	0	28.72	0.015	1	1	1	1	?	?	?	?	2.3	3.791	13.79	13.79	13.79	13.79	13.79	12	6.96	5.372	4.05	3.838	3.791	3.791	9.923	0.1	0.3	2.1	12.6	119.3
								Medium_Lowland	PAN2423	40	2	2016-07-03	2016	rice	0	6.5	0	?	0	61.07	0.031	1	1	1	1	?	?	?	?	3.9	3.84	13.279	12	12	12	12	12	7.471	7.471	4.227	3.955	3.84	3.84	55.588	0.1	0.1	1	7	83.4
								Medium_Lowland	PAN2423	40	2	2016-07-04	2016	rice	0	9.3	0	?	0	21.97	0.046	1	1	1	1	?	?	?	?	5.6	3.903	8.193	8	8	8	8	8	8	8	8	4.05	3.903	3.903	67.88	0	0	0.4	3.4	47.7
								Medium_Lowland	PAN2423	40	2	2016-07-05	2016	rice	0	16.5	0	?	0	16.66	0.061	1	1	1	1	?	?	?	?	9.9	4.05	6.969	8	8	8	8	8	8	8	8	7.678	4.05	4.05	73.988	0	0	0.3	2.4	40.9
								Medium_Lowland	PAN2423	40	2	2016-07-06	2016	rice	0	26.6	0	?	0	6.15	0.077	1	1	1	1	?	?	?	?	15.9	7.235	7.862	8	8	8	8	8	8	8	8	8	7.235	7.235	68.314	0	0	0.2	1.8	35
								Medium_Lowland	PAN2423	40	2	2016-07-07	2016	rice	0	37.1	0	?	0	5.84	0.092	1	1	1	1	?	?	?	?	22.3	8	8.446	8	8	8	8	8	8	8	8	8	8	8	62.674	0	0	0.1	1.3	29.9
								Medium_Lowland	PAN2423	40	2	2016-07-08	2016	rice	0	57	0	?	0	9.53	0.107	1	1	1	1	?	?	?	?	34.2	8	7.251	8	8	8	8	8	8	8	8	8	8	8	59.937	0	0	0.1	0.9	25.5
								Medium_Lowland	PAN2423	40	2	2016-07-09	2016	rice	0	79.8	0	?	0	17.37	0.122	1	1	1	1	?	?	?	?	47.9	8	8.24	8	8	8	8	8	8	8	8	8	8	8	64.727	0	0	0.1	0.6	21.8
								Medium_Lowland	PAN2423	40	2	2016-07-10	2016	rice	0	113.3	0	?	0	4.58	0.137	1	1	1	1	?	?	?	?	68	8	7.76	8	8	8	8	8	8	8	8	8	8	8	56.451	0	0	0	0.5	18.6
								Medium_Lowland	PAN2423	40	2	2016-07-11	2016	rice	0	150.2	0	?	0	15.79	0.152	1	1	1	1	?	?	?	?	90.1	8	8.378	8	8	8	8	8	8	8	8	8	8	8	59.868	0	0	0	0.3	15.8
								Medium_Lowland	PAN2423	40	2	2016-07-12	2016	rice	0	184.4	0	?	0	7.89	0.167	1	1	1	1	?	?	?	?	110.6	8	8.766	8	8	8	8	8	8	8	8	8	8	8	56.786	0	0	0	0.2	13.4
								Medium_Lowland	PAN2423	40	2	2016-07-13	2016	rice	0	245.8	0	?	0	4.32	0.182	1	1	1	1	?	?	?	?	147.5	8	7.291	8	8	8	8	8	8	8	8	8	8	8	50.22	0	0	0	0.2	11.4
								Medium_Lowland	PAN2423	40	2	2016-07-14	2016	rice	0	284.8	0	?	0	8.36	0.197	1	1	1	1	?	?	?	?	170.9	8	8.577	8	8	8	8	8	8	8	8	8	8	8	47.561	0	0	0	0.1	9.7
								Medium_Lowland	PAN2423	40	2	2016-07-15	2016	rice	0	310.9	0	?	0	13.96	0.213	1	1	1	1	?	?	?	?	186.5	8	8.632	8	8	8	8	8	8	8	8	8	8	8	51.779	0	0	0	0.1	8.3
								Medium_Lowland	PAN2423	40	2	2016-07-16	2016	rice	0	348.5	0	?	0	21.22	0.228	1	1	1	1	?	?	?	?	209.1	8	7.471	8	8	8	8	8	8	8	8	8	8	8	63.361	0	0	0	0.1	7
								Medium_Lowland	PAN2423	40	2	2016-07-17	2016	rice	0	406.1	0	?	0	10.85	0.243	1	1	1	1	?	?	?	?	243.7	8	7.588	8	8	8	8	8	8	8	8	8	8	8	63.602	0	0	0	0	6
								Medium_Lowland	PAN2423	40	2	2016-07-18	2016	rice	0	455.5	0	?	0	5.77	0.258	1	1	1	1	?	?	?	?	273.3	8	8.093	8	8	8	8	8	8	8	8	8	8	8	58.445	0	0	0	0	5.1
								Medium_Lowland	PAN2423	40	2	2016-07-19	2016	rice	0	512.3	0	?	0	10.86	0.273	1	1	1	1	?	?	?	?	307.4	8	7.961	8	8	8	8	8	8	8	8	8	8	8	58.43	0	0	0	0	4.3
								Medium_Lowland	PAN2423	40	2	2016-07-20	2016	rice	0	577.2	0	?	0	3.68	0.288	1	1	1	1	?	?	?	?	346.3	8	7.796	8	8	8	8	8	8	8	8	8	8	8	50.992	0	0	0	0	3.7
								Medium_Lowland	PAN2423	40	2	2016-07-21	2016	rice	0	636.6	0	?	0	4.91	0.303	1	1	1	1	?	?	?	?	381.9	8	8.459	8	8	8	8	8	8	8	8	8	8	8	45.039	0	0	0	0	3.1
								Medium_Lowland	PAN2423	40	2	2016-07-22	2016	rice	0	83.5	0	?	0	13.34	0.319	1	1	1	1	?	?	?	?	50.1	8	8.363	8	8	8	8	8	8	8	8	8	8	8	48.337	0	0	0	0	2.6
								Medium_Lowland	PAN2423	40	2	2016-07-23	2016	rice	0	85.8	0	?	0	28.78	0.319	1	1	1	0.953	?	?	?	?	51.5	8	8.105	8	8	8	8	8	8	8	8	8	8	8	67.544	0	0	0	0	2.2
								Medium_Lowland	PAN2423	40	2	2016-07-24	2016	rice	0	91.3	0	?	0	8.56	0.319	1	1	1	0.934	?	?	?	?	54.8	8	7.414	8.039	8	8	8	8	8	8	8	8	8	8	65.907	0	0	0	0	1.9
								Medium_Lowland	PAN2423	40	2	2016-07-25	2016	rice	0	93.3	0	?	0	46.34	0.319	1	1	1	0.969	?	?	?	?	56	8	8.941	8.084	8.021	8	8	8	8	8	8	8	8	8	102.172	0	0	0	0	1.6
								Medium_Lowland	PAN2423	40	2	2016-07-26	2016	rice	0	98	0	?	0	22.19	0.319	1	1	1	0.969	?	?	?	?	58.8	8	7.507	8.036	8.014	8	8	8	8	8	8	8	8	8	114.648	0	0	0	0	1.4
								Medium_Lowland	PAN2423	40	2	2016-07-27	2016	rice	0	104.9	0	?	0	10.63	0.319	1	1	1	0.902	?	?	?	?	62.9	8	7.365	8.079	8.039	8	8	8	8	8	8	8	8	8	114.119	0	0	0	0	1.2
								Medium_Lowland	PAN2423	40	2	2016-07-28	2016	rice	0	112.8	0	?	0	0.6	0.319	1	1	1	0.881	?	?	?	?	67.7	8	7.822	8.143	8.082	8	8	8	8	8	8	8	8	8	102.004	0	0	0	0	1
								Medium_Lowland	PAN2423	40	2	2016-07-29	2016	rice	0	122.1	0	?	0	8.19	0.319	1	1	1	0.9	?	?	?	?	73.3	8	8.365	8.199	8.124	8.025	8	8	8	8	8	8	8	8	97.155	0	0	0	0	0.8
								Medium_Lowland	PAN2423	40	2	2016-07-30	2016	rice	0	130.3	0	?	0	8.02	0.319	1	1	1	0.966	?	?	?	?	78.2	8	9.004	8.222	8.148	8.049	8	8	8	8	8	8	8	8	93.221	0	0	0	0	0.7
								Medium_Lowland	PAN2423	40	2	2016-07-31	2016	rice	0	142.7	0	?	0	13.05	0.333	1	1	1	0.937	?	?	?	?	85.6	8	7.805	8.165	8.116	8.05	8	8	8	8	8	8	8	8	94.908	0	0	0	0	0.6
								Medium_Lowland	PAN2423	40	2	2016-08-01	2016	rice	0	153	0	?	0	30.95	0.348	1	1	1	0.981	?	?	?	?	91.8	8	9.07	8.273	8.198	8.099	8	8	8	8	8	8	8	8	114.718	0	0	0	0	0.5
								Medium_Lowland	PAN2423	40	2	2016-08-02	2016	rice	0	171.9	0	?	0	24.09	0.364	1	1	1	0.959	?	?	?	?	103.2	8	7.685	8.193	8.144	8.08	8	8	8	8	8	8	8	8	128.01	0	0	0	0	0.4
								Medium_Lowland	PAN2423	40	2	2016-08-03	2016	rice	0	200.4	0	?	0	15.7	0.379	1	1	1	0.937	?	?	?	?	120.3	8	8.018	8.372	8.286	8.172	8	8	8	8	8	8	8	8	131.616	0	0	0	0	0.4
								Medium_Lowland	PAN2423	40	2	2016-08-04	2016	rice	0	235.8	0	?	0	17.78	0.394	1	1	1	0.943	?	?	?	?	141.5	8	8.761	8.626	8.492	8.313	8	8	8	8	8	8	8	8	136.528	0	0	0	0	0.3
								Medium_Lowland	PAN2423	40	2	2016-08-05	2016	rice	0	263	0	?	0	19.24	0.409	1	1	1	0.985	?	?	?	?	157.8	8	9.736	8.75	8.6	8.4	8	8	8	8	8	8	8	8	143.819	0	0	0	0	0.3
								Medium_Lowland	PAN2423	40	2	2016-08-06	2016	rice	0	286	0	?	0	16.8	0.426	1	1	1	0.986	?	?	?	?	171.6	8	8.883	8.474	8.385	8.267	8	8	8	8	8	8	8	8	150.348	0	0	0	0	0.2
								Medium_Lowland	PAN2423	40	2	2016-08-07	2016	rice	0	310.5	0	?	0	22.95	0.443	1	1	1	0.987	?	?	?	?	186.3	8	8.546	8.39	8.322	8.23	8	8	8	8	8	8	8	8	163.597	0	0	0	0	0.2
								Medium_Lowland	PAN2423	40	2	2016-08-08	2016	rice	0	378.5	0	?	0	26.02	0.46	1	1	1	0.978	?	?	?	?	227.1	8	7.612	8.402	8.335	8.246	8.022	8	8	8	8	8	8	8	179.181	0	0	0	0	0.2
								Medium_Lowland	PAN2423	40	2	2016-08-09	2016	rice	0	450.1	0	?	0	26.03	0.477	1	1	0.401	0.988	?	?	?	?	270	8	9.682	9.241	9.045	8.784	8.131	8	8	8	8	8	8	8	193.276	0	0	0	0	0.1
								Medium_Lowland	PAN2423	40	2	2016-08-10	2016	rice	0	467.3	0	?	0	64.9	0.493	1	1	0.279	1	?	?	?	?	280.4	8	9.828	9.185	9.007	8.77	8.178	8	8	8	8	8	8	8	247.48	0	0	0	0	0.1
								Medium_Lowland	PAN2423	40	2	2016-08-11	2016	rice	0	551.1	0	?	0	18.08	0.51	1	1	0	0.978	?	?	?	?	330.7	8	7.461	8.316	8.271	8.211	8.06	8	8	8	8	8	8	8	255.504	0	0	0	0	0.1
								Medium_Lowland	PAN2423	40	2	2016-08-12	2016	rice	0	656.7	0	?	0	11.77	0.527	1	1	0	0.967	?	?	?	?	392.8	8	9.511	9.62	9.399	9.104	8.368	8	8	8	8	8	8	8	254.263	0	0	0	0	0.1
								Medium_Lowland	PAN2423	40	2	2016-08-13	2016	rice	0	776.1	0	?	0	2.7	0.543	1	1	0	0.956	?	?	?	?	460.6	8	10.04	10.222	9.932	9.546	8.58	8	8	8	8	8	8	8	242.458	0	0	0	0	0.1
								Medium_Lowland	PAN2423	40	2	2016-08-14	2016	rice	0	904.3	0	?	0	6.01	0.56	1	1	0	0.958	?	?	?	?	530.8	8	11.328	11.048	10.667	10.159	8.889	8	8	8	8	8	8	8	232.521	0	0	0	0	0.1
								Medium_Lowland	PAN2423	40	2	2016-08-15	2016	rice	0	1038.4	0	?	0	16.46	0.577	1	1	0	0.966	?	?	?	?	601.6	8	11.831	11.369	10.965	10.426	9.078	8	8	8	8	8	8	8	233.016	0	0	0	0	0.1
								Medium_Lowland	PAN2423	40	2	2016-08-16	2016	rice	0	1177.4	0	?	0	7.59	0.594	1	1	0	0.972	?	?	?	?	672	8	11.808	11.39	10.999	10.477	9.173	8	8	8	8	8	8	8	225.156	0	0	0	0	0
								Medium_Lowland	PAN2423	40	2	2016-08-17	2016	rice	0	1270.9	0	?	0	28.62	0.611	1	1	0	0.991	?	?	?	?	717.5	8	12.7	11.501	11.112	10.593	9.297	8	8	8	8	8	8	8	239.396	0	0	0	0	0
								Medium_Lowland	PAN2423	40	2	2016-08-18	2016	rice	0	1414.8	0	?	0	16.36	0.628	1	1	0	0.988	?	?	?	?	784.7	8	9.404	9.817	9.622	9.362	8.714	8	8	8	8	8	8	8	243.658	0	0	0	0	0
								Medium_Lowland	PAN2423	40	2	2016-08-19	2016	rice	0	1563.5	0	?	0	4.1	0.645	1	1	0	0.991	?	?	?	?	851.1	8	11.686	11.351	11.004	10.542	9.386	8	8	8	8	8	8	8	233.535	0	0	0	0	0
								Medium_Lowland	PAN2423	40	2	2016-08-20	2016	rice	0	1741.6	0	?	0	3.55	0.661	1	1	0	0.978	?	?	?	?	927	8	11.151	11.34	11.006	10.561	9.447	8	8	8	8	8	8	8	222.576	0	0	0	0	0
								Medium_Lowland	PAN2423	40	2	2016-08-21	2016	rice	0	1840.1	0	?	0	77.37	0.68	1	1	0	0.993	?	?	?	?	967.1	8	14.143	12.781	12.319	11.702	10.159	8	8	8	8	8	8	8	284.526	0	0	0	0	0
								Medium_Lowland	PAN2423	40	2	2016-08-22	2016	rice	0	1981.6	0	?	0	48.45	0.7	1	1	0	0.992	?	?	?	?	1021.4	8	9.643	9.745	9.581	9.363	8.818	8	8	8	8	8	8	8	299.22	0	0	0	0	0
								Medium_Lowland	PAN2423	40	2	2016-08-23	2016	rice	0	2189.1	0	?	0	3.36	0.719	1	1	0	0.983	?	?	?	?	1096.1	8	9.933	10.536	10.306	9.998	9.23	8	8	8	8	8	8	8	289.496	0	0	0	0	0
								Medium_Lowland	PAN2423	40	2	2016-08-24	2016	rice	0	2399.9	0	?	0	3.21	0.739	1	1	0	0.991	?	?	?	?	1167.1	8	13.747	13.191	12.733	12.123	10.596	8	8	8	8	8	8	8	276.234	0	0	0	0	0
								Medium_Lowland	PAN2423	40	2	2016-08-25	2016	rice	0	2589.7	0	?	0	4.03	0.758	1	1	0	0.993	?	?	?	?	1226.5	8	13.1	12.573	12.181	11.659	10.352	8	8	8	8	8	8	8	264.992	0	0	0	0	0
								Medium_Lowland	PAN2423	40	2	2016-08-26	2016	rice	0	2815.3	0	?	0	5.2	0.778	1	1	0	0.989	?	?	?	?	1292.1	8	11.672	11.791	11.475	11.054	10.001	8	8	8	8	8	8	8	255.715	0	0	0	0	0
								Medium_Lowland	PAN2423	40	2	2016-08-27	2016	rice	0	3041.8	0	?	0	2.49	0.798	1	1	0	0.985	?	?	?	?	1352.4	8	13.306	13.172	12.752	12.193	10.795	8	8	8	8	8	8	8	241.77	0	0	0	0	0
								Medium_Lowland	PAN2423	40	2	2016-08-28	2016	rice	0	3262.9	0	?	0	0.36	0.818	1	1	0	0.993	?	?	?	?	1406.1	8	14.584	13.904	13.426	12.787	11.192	8	8	8	8	8	8	8	225.117	0	0	0	0	0
								Medium_Lowland	PAN2423	40	2	2016-08-29	2016	rice	0	3485.6	0	?	0	4.15	0.837	1	1	0	0.993	?	?	?	?	1454.9	8	12.81	12.593	12.221	11.724	10.483	8	8	8	8	8	8	8	214.001	0	0	0	0	0
								Medium_Lowland	PAN2423	40	2	2016-08-30	2016	rice	0	3721.2	0	?	0	0.37	0.857	1	1	0	0.987	?	?	?	?	1501	8	12.81	12.807	12.417	11.898	10.599	8	8	8	8	8	8	8	198.586	0	0	0	0	0
								Medium_Lowland	PAN2423	40	2	2016-08-31	2016	rice	0	3832.7	0	?	0	7.96	0.877	1	1	0	0.997	?	?	?	?	1520.1	8	15.125	13.951	13.468	12.825	11.217	8	8	8	8	8	8	8	190.244	0	0	0	0	0
								Medium_Lowland	PAN2423	40	2	2016-09-01	2016	rice	0	4043.9	0	?	0	3.67	0.897	1	1	0	0.993	?	?	?	?	1551.3	8	9.643	9.884	9.731	9.527	9.018	8	8	8	8	8	8	8	182.521	0	0	0	0	0
								Medium_Lowland	PAN2423	40	2	2016-09-02	2016	rice	0	4263.8	0	?	0	7.22	0.917	1	1	0	0.993	?	?	?	?	1578.4	8	12.017	11.856	11.544	11.127	10.084	8	8	8	8	8	8	8	175.7	0	0	0	0	0
								Medium_Lowland	PAN2423	40	2	2016-09-03	2016	rice	0	4406.1	0	?	0	18.11	0.937	1	1	0	0.994	?	?	?	?	1592.5	8	12.67	12.06	11.731	11.292	10.195	8	8	8	8	8	8	8	179.931	0	0	0	0	0
								Medium_Lowland	PAN2423	40	2	2016-09-04	2016	rice	0	4628.7	0	?	0	19.21	0.957	1	1	0	0.993	?	?	?	?	1609.3	8	9.999	10.239	10.058	9.816	9.21	8	8	8	8	8	8	8	187.26	0	0	0	0	0
								Medium_Lowland	PAN2423	40	2	2016-09-05	2016	rice	0	4832.9	101.6	?	0	38.61	0.977	1	1	0	0.993	?	?	?	?	1619.7	8	12.207	11.928	11.61	11.185	10.123	8	8	8	8	8	8	8	211.828	0	0	0	0	0
								Medium_Lowland	PAN2423	40	2	2016-09-06	2016	rice	0	4974.3	178.7	?	0	17.35	0.997	1	1	0	0.994	?	?	?	?	1623.6	8	12.131	11.64	11.345	10.951	9.967	8	8	8	8	8	8	8	215.841	0	0	0	0	0
								Medium_Lowland	PAN2423	40	2	2016-09-07	2016	rice	0	5169.8	294.6	?	0	3.6	1.016	1	1	0	0.993	?	?	?	?	1624.3	8	10.112	10.258	10.075	9.831	9.221	8	8	8	8	8	8	8	207.624	0	0	0	0	0
								Medium_Lowland	PAN2423	40	2	2016-09-08	2016	rice	0	5367.9	455.3	?	0	2.62	1.046	1	1	0	0.993	?	?	?	?	1624.3	8	11.453	11.502	11.218	10.84	9.893	8	8	8	8	8	8	8	196.544	0	0	0	0	0
								Medium_Lowland	PAN2423	40	2	2016-09-09	2016	rice	0	5558.6	623.6	?	0	2.04	1.077	1	1	0	0.993	?	?	?	?	1624.3	8	12.742	12.475	12.112	11.628	10.419	8	8	8	8	8	8	8	183.619	0	0	0	0	0
								Medium_Lowland	PAN2423	40	2	2016-09-10	2016	rice	0	5746.5	801.6	?	0	1.95	1.107	1	1	0	0.992	?	?	?	?	1624.3	8	12.382	12.345	11.993	11.523	10.349	8	8	8	8	8	8	8	170.572	0	0	0	0	0
								Medium_Lowland	PAN2423	40	2	2016-09-11	2016	rice	0	5922.1	980.8	?	0	8.4	1.136	1	1	0	0.993	?	?	?	?	1624.3	8	13.718	13.133	12.717	12.162	10.775	8	8	8	8	8	8	8	163.233	0	0	0	0	0
								Medium_Lowland	PAN2423	40	2	2016-09-12	2016	rice	0	6069.9	1145.5	?	0	14.9	1.166	1	1	0	0.993	?	?	?	?	1624.3	8	12.206	11.847	11.535	11.119	10.079	8	8	8	8	8	8	8	164.243	0	0	0	0	0
								Medium_Lowland	PAN2423	40	2	2016-09-13	2016	rice	0	6217.1	1317.7	?	0	7.73	1.195	1	1	0	0.993	?	?	?	?	1624.3	8	11.373	11.205	10.945	10.599	9.732	8	8	8	8	8	8	8	158.924	0	0	0	0	0
								Medium_Lowland	PAN2423	40	2	2016-09-14	2016	rice	0	6373.1	1505.9	?	0	5.05	1.225	1	1	0	0.993	?	?	?	?	1624.3	8	11.014	11.205	10.945	10.599	9.732	8	8	8	8	8	8	8	150.556	0	0	0	0	0
								Medium_Lowland	PAN2423	40	2	2016-09-15	2016	rice	0	6520.1	1683.5	?	0	1.98	1.255	0.954	0.994	0	0.993	?	?	?	?	1624.3	8	12.932	12.641	12.265	11.763	10.509	8	8	8	8	8	8	8	137.239	0	0	0	0	0
								Medium_Lowland	PAN2423	40	2	2016-09-16	2016	rice	0	6662.8	1853.8	?	0	1.87	1.285	0.954	0.994	0	0.993	?	?	?	?	1624.3	8	12.636	12.452	12.091	11.609	10.406	8	8	8	8	8	8	8	124.001	0	0	0	0	0
								Medium_Lowland	PAN2423	40	2	2016-09-17	2016	rice	0	6755.3	1971	?	0	11.93	1.315	0.954	0.994	0	0.994	?	?	?	?	1624.3	8	13.497	12.64	12.264	11.763	10.508	8	8	8	8	8	8	8	121.197	0	0	0	0	0
								Medium_Lowland	PAN2423	40	2	2016-09-18	2016	rice	0	6879.2	2117.3	?	0	1.71	1.345	0.954	0.994	0	0.993	?	?	?	?	1624.3	8	9.814	10.12	9.948	9.719	9.146	8	8	8	8	8	8	8	111.083	0	0	0	0	0
								Medium_Lowland	PAN2423	40	2	2016-09-19	2016	rice	0	7000.9	2259	?	0	2.51	1.375	0.954	0.994	0	0.993	?	?	?	?	1624.3	8	11.811	11.846	11.534	11.119	10.079	8	8	8	8	8	8	8	99.212	0	0	0	0	0
								Medium_Lowland	PAN2423	40	2	2016-09-20	2016	rice	0	7117	2393.2	?	0	1.32	1.405	0.954	0.994	0	0.993	?	?	?	?	1624.3	8	13.02	12.75	12.365	11.851	10.568	8	8	8	8	8	8	8	84.943	0	0	0	0	0
								Medium_Lowland	PAN2423	40	2	2016-09-21	2016	rice	0	7217.1	2509.6	?	0	13.71	1.435	0.954	0.994	0	0.993	?	?	?	?	1624.3	8	13.347	12.661	12.283	11.779	10.519	8	8	8	8	8	8	8	83.607	0	0	0	0	0
								Medium_Lowland	PAN2423	40	2	2016-09-22	2016	rice	0	7319.7	2626.7	?	0	7.32	1.465	0.954	0.994	0	0.993	?	?	?	?	1624.3	8	10.949	10.974	10.733	10.412	9.608	8	8	8	8	8	8	8	77.954	0	0	0	0	0
								Medium_Lowland	PAN2423	40	2	2016-09-23	2016	rice	0	7413.4	2733.6	?	0	10.47	1.495	0.954	0.994	0	0.993	?	?	?	?	1624.3	8	11.936	11.644	11.348	10.954	9.97	8	8	8	8	8	8	8	74.636	0	0	0	0	0
								Medium_Lowland	PAN2423	40	2	2016-09-24	2016	rice	0	7495.6	2827.7	?	0	9.53	1.524	0.954	0.994	0	0.993	?	?	?	?	1624.3	8	11.589	11.256	10.992	10.64	9.76	8	8	8	8	8	8	8	71.05	0	0	0	0	0
								Medium_Lowland	PAN2423	40	2	2016-09-25	2016	rice	0	7566.9	2909.7	?	0	8.01	1.554	0.954	0.994	0	0.993	?	?	?	?	1624.3	8	10.891	10.645	10.431	10.145	9.43	8	8	8	8	8	8	8	66.863	0	0	0	0	0
								Medium_Lowland	PAN2423	40	2	2016-09-26	2016	rice	0	7632.5	2984.8	?	0	8.03	1.584	0.954	0.994	0	0.993	?	?	?	?	1624.3	8	10.361	10.205	10.026	9.788	9.192	8	8	8	8	8	8	8	63.312	0	0	0	0	0
								Medium_Lowland	PAN2423	40	2	2016-09-27	2016	rice	0	7704.6	3065.6	?	0	2.75	1.614	0.954	0.994	0	0.993	?	?	?	?	1624.3	8	9.574	10.012	9.849	9.632	9.088	8	8	8	8	8	8	8	54.18	0	0	0	0	0
								Medium_Lowland	PAN2423	40	2	2016-09-28	2016	rice	0	7755.4	3124.2	?	0	13.81	1.643	0.954	0.994	0	0.994	?	?	?	?	1624.3	8	12.556	11.794	11.486	11.076	10.051	8	8	8	8	8	8	8	54.235	0	0	0	0	0
								Medium_Lowland	PAN2423	40	2	2016-09-29	2016	rice	0	7813	3188.9	?	0	3.98	1.673	0.954	0.994	0	0.993	?	?	?	?	1624.3	8	9.46	9.718	9.579	9.393	8.929	8	8	8	8	8	8	8	46.911	0	0	0	0	0
								Medium_Lowland	PAN2423	40	2	2016-09-30	2016	rice	0	7867	3249.1	?	0	2.07	1.703	0.954	0.994	0	0.993	?	?	?	?	1624.3	8	10.797	10.911	10.675	10.36	9.573	8	8	8	8	8	8	8	35.72	0	0	0	0	0
								Medium_Lowland	PAN2423	40	2	2016-10-01	2016	rice	0	7915.5	3303.2	?	0	4.99	1.733	0.954	0.994	0	0.993	?	?	?	?	1624.3	8	11.966	11.643	11.347	10.953	9.969	8	8	8	8	8	8	8	26.514	0	0	0	0	0
								Medium_Lowland	PAN2423	40	2	2016-10-02	2016	rice	0	7958	3350.9	?	0	2.94	1.764	0.954	0.994	0	0.993	?	?	?	?	1624.3	8	11.335	11.14	10.885	10.546	9.697	8	8	8	8	8	8	8	15.953	0	0	0	0	0
								Medium_Lowland	PAN2423	40	2	2016-10-03	2016	rice	0	7996.6	3394.1	?	0	0.72	1.792	0.954	0.994	0	0.993	?	?	?	?	1624.3	8	10.917	10.95	10.711	10.392	9.595	8	8	8	8	8	8	8	3.21	0	0	0	0	0
								Medium_Lowland	PAN2423	40	2	2016-10-04	2016	rice	0	8030.9	3432.6	?	0	1.11	1.822	0.954	0.994	0	0.993	?	?	?	?	1624.3	6.96	3.597	2.815	2.543	2.18	2.5	4.8	6.96	6.96	6.96	6.96	6.96	6.96	0	0	0	0	0	0
								Medium_Lowland	PAN2423	40	2	2016-10-05	2016	rice	0	8056.5	3461.8	?	0	3.49	1.852	0.954	0.994	0	1	?	?	?	?	1624.3	6.96	2.841	2.62	2.383	2.066	2.5	3.521	6.96	6.96	6.96	6.96	6.96	6.96	0	0	0	0	0	0
								Medium_Lowland	PAN2423	40	2	2016-10-06	2016	rice	0	8130	3538.7	?	0	9.69	1.882	0.954	0.994	0	0.993	?	?	?	?	1624.3	6.424	9.268	9.251	9.135	8.981	6.14	4.259	6.424	6.424	6.424	6.424	6.424	6.424	0	0	0	0	0	0
								Medium_Lowland	PAN2423	40	2	2016-10-07	2016	rice	0	8205.9	3617.7	?	0	6.55	1.912	0.954	0.994	0	0.998	?	?	?	?	1624.3	5.381	5.911	5.712	5.505	5.228	4.538	3.818	5.381	5.381	5.381	5.381	5.381	5.381	0	0	0	0	0	0
								Medium_Lowland	PAN2423	40	2	2016-10-08	2016	rice	0	8286	3700.4	?	0	8.91	1.942	0.954	0.994	0	0.997	?	?	?	?	1624.3	5.149	8.46	8.379	8.256	8.093	7.685	4.8	5.149	5.149	5.149	5.149	5.149	5.149	0	0	0	0	0	0
								Medium_Lowland	PAN2423	40	2	2016-10-09	2016	rice	0	8363.8	3780.7	?	0	4.54	1.971	0.954	0.994	0.824	0.999	?	?	?	?	1624.3	4.741	4.067	3.988	3.87	3.712	3.318	4.13	4.741	4.741	4.741	4.741	4.741	4.741	0	0	0	0	0	0
								Medium_Lowland	PAN2423	40	2	2016-10-10	2016	rice	0	8438.8	3857.9	?	0	12.73	2	0.954	0.994	1	0.999	?	?	?	?	1624.3	4.902	12.316	12.246	12.141	12	11.649	5.142	4.902	4.902	4.902	4.902	4.902	4.902	0	0	0	0	0	0
								Medium_Lowland	PAN2423	40	2	2016-10-11	2016	rice	0	8519.5	3940.6	?	0	6.79	2.03	0.954	0.994	1	0.996	?	?	?	?	1624.3	5.007	6.388	6.326	6.232	6.106	5.793	5.166	5.007	5.007	5.007	5.007	5.007	5.007	0	0	0	0	0	0
								Medium_Lowland	PAN2423	40	2	2016-10-12	2016	rice	0	8611.2	4034	?	0	4.17	2.059	0.954	0.994	1	0.993	?	?	?	?	1624.3	4.924	3.553	3.588	3.478	3.331	2.965	4.8	4.924	4.924	4.924	4.924	4.924	4.924	0	0	0	0	0	0
								Medium_Lowland	PAN2423	40	2	2016-10-13	2016	rice	0	8704.3	4128.7	?	0	0.92	2.087	0.954	0.994	1	0.991	?	?	?	?	1624.3	4.71	0.04	0.57	0.855	1.14	2.5	4.389	4.71	4.71	4.71	4.71	4.71	4.71	0	0	0	0	0	0
								Medium_Lowland	PAN2423	40	2	2016-10-14	2016	rice	0	8794.6	4220.5	?	0	0.04	2.114	0.954	0.994	1	0.94	?	?	?	?	1624.3	4.05	-0.631	0.149	0.634	1.11	1.864	2.946	4.005	4.05	4.05	4.05	4.05	4.05	0	0	0	0	0	0
								Medium_Lowland	PAN2423	40	2	2016-10-15	2016	rice	0	8883.2	4310.3	?	0	0.01	2.14	0.954	0.994	1	0.817	?	?	?	?	1624.3	4.05	-0.597	-0.799	0.239	0.571	0.959	1.738	3.098	4.05	4.05	4.05	4.05	4.05	0	0	0	0	0	0
								Medium_Lowland	PAN2423	40	2	2016-10-16	2016	rice	0	8969.5	4397.9	?	0	0	2.167	0.954	0.994	1	0.722	?	?	?	?	1624.3	4.05	-0.89	-0.539	-0.782	0.185	0.321	0.769	2.166	4.05	4.05	4.05	4.05	4.05	0	0	0	0	0	0
								Medium_Lowland	PAN2423	40	2	2016-10-17	2016	rice	0	9053	4482.4	?	0	0	2.193	0.954	0.994	1	0.656	?	?	?	?	1624.3	4.05	-0.808	-0.806	-0.461	-0.807	-0.197	0.071	1.328	3.584	4.05	4.05	4.05	4.05	0	0	0	0	0	0
								Medium_Lowland	PAN2423	40	2	2016-10-18	2016	rice	0	9136.3	4566.6	?	0	0	2.22	0.954	0.994	1	0.616	?	?	?	?	1624.3	4.05	-0.878	-0.7	-0.761	-0.6	-0.22	-0.242	0.797	2.748	4.05	4.05	4.05	4.05	0	0	0	0	0	0
								Medium_Lowland	PAN2423	40	2	2016-10-19	2016	rice	0	9217.6	4648.7	?	0	0	2.248	0.954	0.994	1	0.573	?	?	?	?	1624.3	4.05	-0.827	-0.765	-0.727	-0.465	-0.22	-0.26	0.381	2.038	4.05	4.05	4.05	4.05	0	0	0	0	0	0
								Medium_Lowland	PAN2423	40	2	2016-10-20	2016	rice	0	9296	4727.9	?	0	0	2.274	0.954	0.994	1	0.532	?	?	?	?	1624.3	4.05	-0.781	-0.712	-0.648	-0.383	-0.206	-0.281	0.125	1.464	3.355	4.05	4.05	4.05	0	0	0	0	0	0
								Medium_Lowland	PAN2423	40	2	2016-10-21	2016	rice	0	9372.5	4805.1	?	0	0	2.3	0.954	0.994	1	0.496	?	?	?	?	1624.3	4.05	-0.739	-0.607	-0.437	-0.323	-0.192	-0.296	-0.304	1.025	2.656	4.05	4.05	4.05	0	0	0	0	0	0
								Medium_Lowland	PAN2423	40	2	2016-10-22	2016	rice	0	9444.3	4877.5	?	0	0	2.327	0.954	0.994	1	0.462	?	?	?	?	1624.3	4.05	-0.647	-0.442	-0.32	-0.232	-0.184	-0.321	-0.251	0.626	2.047	4.038	4.05	4.05	0	0	0	0	0	0
								Medium_Lowland	PAN2423	40	2	2016-10-23	2016	rice	0	9513.1	4946.9	?	0	0	2.353	0.954	0.994	1	0.435	?	?	?	?	1624.3	4.05	-0.417	-0.342	-0.25	-0.173	-0.177	-0.335	-0.22	0.363	1.542	3.289	4.05	4.05	0	0	0	0	0	0
								Medium_Lowland	PAN2423	40	2	2016-10-24	2016	rice	0	9578	5012.3	?	0	0	2.377	0.954	0.994	1	0.412	?	?	?	?	1624.3	4.05	-0.324	-0.276	-0.202	-0.153	-0.151	-0.345	-0.203	0.188	1.136	2.643	4.05	4.05	0	0	0	0	0	0
								Medium_Lowland	PAN2423	40	2	2016-10-25	2016	rice	0	9641.6	5076.3	?	0	0	2.401	0.954	0.994	1	0.394	?	?	?	?	1624.3	4.024	-0.264	-0.231	-0.175	-0.138	-0.134	-0.349	-0.193	0.071	0.816	2.095	4.024	4.024	0	0	0	0	0	0
								Medium_Lowland	PAN2423	40	2	2016-10-26	2016	rice	0	9688.1	5123.2	?	0	5.05	2.426	0.954	0.994	1	0.44	?	?	?	?	1624.3	3.308	2.838	1.447	0.625	0.012	-0.111	-0.351	-0.188	0	0.571	1.638	3.308	3.308	0	0	0	0	0	0
								Medium_Lowland	PAN2423	40	2	2016-10-27	2016	fallow	0	0	0	?	0	22.43	0	1	1	1	1	?	?	?	?	0	2.696	20.157	19.841	16.299	11.591	4.623	-0.22	-0.18	0	0.4	1.267	2.696	2.696	0	0	0	0	0	0
								Medium_Lowland	PAN2423	40	2	2016-10-28	2016	fallow	0	0	0	?	0	1.95	0	1	1	1	1	?	?	?	?	0	2.178	-0.18	0.31	0.855	1.14	1.848	-0.107	-0.17	0	0.28	0.971	2.178	2.178	0	0	0	0	0	0
								Medium_Lowland	PAN2423	40	2	2016-10-29	2016	fallow	0	0	0	?	0	1.73	0	1	1	1	1	?	?	?	?	0	1.746	-0.493	-1.12	0.583	1.14	0.874	0	-0.158	0	0.196	0.738	1.746	1.746	0	0	0	0	0	0
								Medium_Lowland	PAN2423	40	2	2016-10-30	2016	fallow	0	0	0	?	0	1.46	0	1	1	1	1	?	?	?	?	0	1.39	-0.952	-0.571	-0.929	0.719	0.671	0.268	-0.138	0	0.137	0.558	1.39	1.39	0	0	0	0	0	0
								Medium_Lowland	PAN2423	40	2	2016-10-31	2016	fallow	0	0	0	?	0	0.63	0	1	1	1	1	?	?	?	?	0	1.35	-1.015	-0.981	-0.56	-0.607	0.335	0.295	0.06	0	0.096	0.419	1.099	1.35	0	0	0	0	0	0
								Medium_Lowland	PAN2423	40	2	2016-11-01	2016	fallow	0	0	0	?	0	1.26	0	1	1	1	1	?	?	?	?	0	1.35	-0.879	-0.751	-0.689	-0.492	-0.17	0.177	0.107	0	0.067	0.314	0.863	1.35	0	0	0	0	0	0
								Medium_Lowland	PAN2423	40	2	2016-11-02	2016	fallow	0	0	0	?	0	0.02	0	1	1	1	1	?	?	?	?	0	1.331	-0.961	-0.852	-0.698	-0.547	-0.228	0.038	0.08	0	0.047	0.234	0.674	1.331	0	0	0	0	0	0
								Medium_Lowland	PAN2423	40	2	2016-11-03	2016	fallow	0	0	0	?	0	12.56	0	1	1	1	1	?	?	?	?	0	1.089	9.407	8.892	6.366	3.574	1.331	0.464	0.233	0	0.033	0.173	0.524	1.089	0	0	0	0	0	0
								Medium_Lowland	PAN2423	40	2	2016-11-04	2016	fallow	0	0	0	?	0	16.73	0	1	1	1	1	?	?	?	?	0	0.888	14.984	14.26	14.26	14.26	10.591	4.515	1.946	0.469	0.164	0.171	0.418	0.888	0	0	0	0	0	0
								Medium_Lowland	PAN2423	40	2	2016-11-05	2016	fallow	0	0	0	?	0	27.53	0	1	1	1	1	?	?	?	?	0	0.74	17.782	17.228	17.228	17.228	17.228	12	5.968	2.119	0.75	0.344	0.396	0.74	0	0	0	0	0	0
								Medium_Lowland	PAN2423	40	2	2016-11-06	2016	fallow	0	0	0	?	0	0.96	0	1	1	1	1	?	?	?	?	0	0.662	-1.072	0.57	0.855	1.14	2.5	4.8	5.5	3.133	1.465	0.681	0.481	0.662	0	0	0	0	0	0
								Medium_Lowland	PAN2423	40	2	2016-11-07	2016	fallow	0	0	0	?	0	0.34	0	1	1	1	1	?	?	?	?	0	0.666	-0.975	-1.385	0.713	1.14	2.39	4.8	5.22	3.759	2.153	1.123	0.674	0.666	0	0	0	0	0	0
								Medium_Lowland	PAN2423	40	2	2016-11-08	2016	fallow	0	0	0	?	0	0	0	1	1	1	1	?	?	?	?	0	0.751	-1.112	-0.667	-1.09	0.784	1.587	3.551	4.552	3.997	2.707	1.598	0.951	0.751	0	0	0	0	0	0
								Medium_Lowland	PAN2423	40	2	2016-11-09	2016	fallow	0	0	0	?	0	0	0	1	1	1	1	?	?	?	?	0	0.909	-0.964	-1.014	-0.579	-0.819	0.793	2.448	3.711	3.911	3.068	2.039	1.277	0.909	0	0	0	0	0	0
								Medium_Lowland	PAN2423	40	2	2016-11-10	2016	fallow	0	0	0	?	0	0	0	1	1	1	1	?	?	?	?	0	1.12	-0.98	-0.82	-0.82	-0.585	-0.485	1.469	2.814	3.582	3.222	2.394	1.612	1.12	0	0	0	0	0	0
								Medium_Lowland	PAN2423	40	2	2016-11-11	2016	fallow	0	0	0	?	0	0	0	1	1	1	1	?	?	?	?	0	1.35	-0.927	-0.884	-0.756	-0.678	-0.307	0.687	1.963	3.096	3.184	2.631	1.918	1.35	0	0	0	0	0	0
								Medium_Lowland	PAN2423	40	2	2016-11-12	2016	fallow	0	0	0	?	0	0	0	1	1	1	1	?	?	?	?	0	1.35	-0.913	-0.85	-0.776	-0.642	-0.286	0.29	1.294	2.556	2.996	2.74	2.165	1.35	0	0	0	0	0	0
								Medium_Lowland	PAN2423	40	2	2016-11-13	2016	fallow	0	0	0	?	0	0	0	1	1	1	1	?	?	?	?	0	1.83	-0.892	-0.846	-0.759	-0.624	-0.304	0.059	0.8	2.029	2.706	2.73	2.334	1.83	0	0	0	0	0	0
								Medium_Lowland	PAN2423	40	2	2016-11-14	2016	fallow	0	0	0	?	0	0	0	1	1	1	1	?	?	?	?	0	2.42	-0.876	-0.829	-0.741	-0.616	-0.318	-0.166	0.48	1.564	2.363	2.62	2.42	2.42	0	0	0	0	0	0
								Medium_Lowland	PAN2423	40	2	2016-11-15	2016	fallow	0	0	0	?	0	0	0	1	1	1	1	?	?	?	?	0	2.424	-0.276	-0.462	-0.528	-0.468	-0.323	-0.152	0.222	1.161	2.003	2.435	2.424	2.424	0	0	0	0	0	0
								Medium_Lowland	PAN2423	40	2	2016-11-16	2016	fallow	0	0	0	?	0	0	0	1	1	1	1	?	?	?	?	0	2.357	-0.382	-0.441	-0.452	-0.415	-0.315	-0.149	0.072	0.835	1.652	2.2	2.357	2.357	0	0	0	0	0	0
								Medium_Lowland	PAN2423	40	2	2016-11-17	2016	fallow	0	0	0	?	0	0	0	1	1	1	1	?	?	?	?	0	2.232	-0.363	-0.399	-0.406	-0.38	-0.303	-0.15	-0.192	0.584	1.332	1.94	2.232	2.232	0	0	0	0	0	0
								Medium_Lowland	PAN2423	40	2	2016-11-18	2016	fallow	0	0	0	?	0	0	0	1	1	1	1	?	?	?	?	0	2.063	-0.338	-0.365	-0.372	-0.352	-0.291	-0.162	0	0.351	1.038	1.669	2.063	2.063	0	0	0	0	0	0
								Medium_Lowland	PAN2423	40	2	2016-11-19	2016	fallow	0	0	0	?	0	0	0	1	1	1	1	?	?	?	?	0	1.867	-0.318	-0.339	-0.345	-0.33	-0.281	-0.159	-0.201	0.246	0.8	1.408	1.867	1.867	0	0	0	0	0	0
								Medium_Lowland	PAN2423	40	2	2016-11-20	2016	fallow	0	0	0	?	0	0	0	1	1	1	1	?	?	?	?	0	1.656	-0.301	-0.319	-0.323	-0.311	-0.271	-0.169	-0.185	0.112	0.594	1.164	1.656	1.656	0	0	0	0	0	0
								Medium_Lowland	PAN2423	40	2	2016-11-21	2016	fallow	0	0	0	?	0	0	0	1	1	1	1	?	?	?	?	0	1.442	-0.288	-0.302	-0.306	-0.296	-0.262	-0.175	-0.174	0.023	0.422	0.942	1.442	1.442	0	0	0	0	0	0
								Medium_Lowland	PAN2423	40	2	2016-11-22	2016	fallow	0	0	0	?	0	0	0	1	1	1	1	?	?	?	?	0	1.35	-0.276	-0.288	-0.291	-0.283	-0.255	-0.18	-0.166	0	0.296	0.748	1.233	1.35	0	0	0	0	0	0
								Medium_Lowland	PAN2423	40	2	2016-11-23	2016	fallow	0	0	0	?	0	0	0	1	1	1	1	?	?	?	?	0	1.35	-0.265	-0.276	-0.279	-0.272	-0.249	-0.183	-0.159	0	0.207	0.586	1.039	1.35	0	0	0	0	0	0
								Medium_Lowland	PAN2423	40	2	2016-11-24	2016	fallow	0	0	0	?	0	0	0	1	1	1	1	?	?	?	?	0	1.35	-0.256	-0.265	-0.268	-0.262	-0.243	-0.185	-0.152	0	0.145	0.453	0.863	1.35	0	0	0	0	0	0
								Medium_Lowland	PAN2423	40	2	2016-11-25	2016	fallow	0	0	0	?	0	0	0	1	1	1	1	?	?	?	?	0	1.288	-0.248	-0.256	-0.259	-0.254	-0.238	-0.186	-0.146	0	0.101	0.348	0.709	1.288	0	0	0	0	0	0
								Medium_Lowland	PAN2423	40	2	2016-11-26	2016	fallow	0	0	0	?	0	0	0	1	1	1	1	?	?	?	?	0	1.074	-0.24	-0.247	-0.25	-0.247	-0.233	-0.186	-0.141	0	0.071	0.265	0.575	1.074	0	0	0	0	0	0
								Medium_Lowland	PAN2423	40	2	2016-11-27	2016	fallow	0	0	0	?	0	0	0	1	1	1	1	?	?	?	?	0	0.891	-0.233	-0.24	-0.243	-0.24	-0.229	-0.186	-0.136	0	0.05	0.2	0.463	0.891	0	0	0	0	0	0
								Medium_Lowland	PAN2423	40	2	2016-11-28	2016	fallow	0	0	0	?	0	0	0	1	1	1	1	?	?	?	?	0	0.734	-0.227	-0.233	-0.236	-0.234	-0.225	-0.185	-0.131	0	0.035	0.151	0.369	0.734	0	0	0	0	0	0
								Medium_Lowland	PAN2423	40	2	2016-11-29	2016	fallow	0	0	0	?	0	0	0	1	1	1	1	?	?	?	?	0	0.602	-0.221	-0.227	-0.23	-0.229	-0.221	-0.184	-0.127	0	0.024	0.113	0.292	0.602	0	0	0	0	0	0
								Medium_Lowland	PAN2423	40	2	2016-11-30	2016	fallow	0	0	0	?	0	0	0	1	1	1	1	?	?	?	?	0	0.49	-0.216	-0.222	-0.225	-0.224	-0.217	-0.183	-0.124	0	0.017	0.084	0.23	0.49	0	0	0	0	0	0
								Medium_Lowland	PAN2423	40	2	2016-12-01	2016	fallow	0	0	0	?	0	0	0	1	1	1	1	?	?	?	?	0	0.397	-0.211	-0.217	-0.22	-0.219	-0.214	-0.181	-0.12	0	0.012	0.062	0.18	0.397	0	0	0	0	0	0
								Medium_Lowland	PAN2423	40	2	2016-12-02	2016	fallow	0	0	0	?	0	0	0	1	1	1	1	?	?	?	?	0	0.32	-0.207	-0.212	-0.215	-0.215	-0.21	-0.179	-0.117	0	0.008	0.046	0.14	0.32	0	0	0	0	0	0
								Medium_Lowland	PAN2423	40	2	2016-12-03	2016	fallow	0	0	0	?	0	0	0	1	1	1	1	?	?	?	?	0	0.256	-0.203	-0.208	-0.211	-0.211	-0.207	-0.177	-0.114	0	0.006	0.034	0.108	0.256	0	0	0	0	0	0
								Medium_Lowland	PAN2423	40	2	2016-12-04	2016	fallow	0	0	0	?	0	0	0	1	1	1	1	?	?	?	?	0	0.204	-0.199	-0.203	-0.206	-0.207	-0.204	-0.175	-0.111	-0.003	0.004	0.025	0.083	0.204	0	0	0	0	0	0
								Medium_Lowland	PAN2423	40	2	2016-12-05	2016	fallow	0	0	0	?	0	0	0	1	1	1	1	?	?	?	?	0	0.162	-0.195	-0.2	-0.203	-0.203	-0.2	-0.173	-0.108	-0.006	0.002	0.018	0.064	0.162	0	0	0	0	0	0
								Medium_Lowland	PAN2423	40	2	2016-12-06	2016	fallow	0	0	0	?	0	0	0	1	1	1	1	?	?	?	?	0	0.128	-0.191	-0.196	-0.199	-0.199	-0.197	-0.171	-0.106	-0.009	0	0.013	0.048	0.128	0	0	0	0	0	0
								Medium_Lowland	PAN2423	40	2	2016-12-07	2016	fallow	0	0	0	?	0	0	0	1	1	1	1	?	?	?	?	0	0.101	-0.188	-0.192	-0.195	-0.196	-0.194	-0.168	-0.104	-0.012	0	0.009	0.037	0.101	0	0	0	0	0	0
								Medium_Lowland	PAN2423	40	2	2016-12-08	2016	fallow	0	0	0	?	0	0	0	1	1	1	1	?	?	?	?	0	0.079	-0.185	-0.189	-0.192	-0.193	-0.191	-0.166	-0.102	-0.015	0	0.006	0.027	0.079	0	0	0	0	0	0
								Medium_Lowland	PAN2423	40	2	2016-12-09	2016	fallow	0	0	0	?	0	0	0	1	1	1	1	?	?	?	?	0	0.061	-0.182	-0.186	-0.189	-0.189	-0.188	-0.164	-0.1	-0.017	0	0.004	0.021	0.061	0	0	0	0	0	0
								Medium_Lowland	PAN2423	40	2	2016-12-10	2016	fallow	0	0	0	?	0	0	0	1	1	1	1	?	?	?	?	0	0.047	-0.179	-0.183	-0.186	-0.186	-0.185	-0.162	-0.099	-0.019	0	0.003	0.015	0.047	0	0	0	0	0	0
								Medium_Lowland	PAN2423	40	2	2016-12-11	2016	fallow	0	0	0	?	0	0	0	1	1	1	1	?	?	?	?	0	0.037	-0.176	-0.18	-0.183	-0.183	-0.183	-0.16	-0.097	-0.021	0	0.002	0.011	0.037	0	0	0	0	0	0
								Medium_Lowland	PAN2423	40	2	2016-12-12	2016	fallow	0	0	0	?	0	0.05	0	1	1	1	1	?	?	?	?	0	0.028	-0.14	-0.157	-0.168	-0.172	-0.179	-0.157	-0.096	-0.023	0	0.002	0.008	0.028	0	0	0	0	0	0
								Medium_Lowland	PAN2423	40	2	2016-12-13	2016	fallow	0	0	0	?	0	0	0	1	1	1	1	?	?	?	?	0	0.022	-0.164	-0.166	-0.169	-0.172	-0.175	-0.155	-0.095	-0.024	0	0.001	0.006	0.022	0	0	0	0	0	0
								Medium_Lowland	PAN2423	40	2	2016-12-14	2016	fallow	0	0	0	?	0	0	0	1	1	1	1	?	?	?	?	0	0.016	-0.166	-0.167	-0.169	-0.171	-0.173	-0.153	-0.094	-0.026	0	0.001	0.005	0.016	0	0	0	0	0	0
								Medium_Lowland	PAN2423	40	2	2016-12-15	2016	fallow	0	0	0	?	0	0.12	0	1	1	1	1	?	?	?	?	0	0.013	-0.084	-0.118	-0.141	-0.15	-0.167	-0.151	-0.093	-0.027	0	0.001	0.003	0.013	0	0	0	0	0	0
								Medium_Lowland	PAN2423	40	2	2016-12-16	2016	fallow	0	0	0	?	0	0	0	1	1	1	1	?	?	?	?	0	0.009	-0.147	-0.144	-0.147	-0.152	-0.163	-0.148	-0.092	-0.028	0	0	0.002	0.009	0	0	0	0	0	0
								Medium_Lowland	PAN2423	40	2	2016-12-17	2016	fallow	0	0	0	?	0	0	0	1	1	1	1	?	?	?	?	0	0.007	-0.154	-0.151	-0.152	-0.155	-0.16	-0.146	-0.091	-0.029	0	0	0.002	0.007	0	0	0	0	0	0
								Medium_Lowland	PAN2423	40	2	2016-12-18	2016	fallow	0	0	0	?	0	0	0	1	1	1	1	?	?	?	?	0	0.005	-0.155	-0.154	-0.154	-0.156	-0.158	-0.144	-0.09	-0.03	0	0	0.001	0.005	0	0	0	0	0	0
								Medium_Lowland	PAN2423	40	2	2016-12-19	2016	fallow	0	0	0	?	0	0	0	1	1	1	1	?	?	?	?	0	0.004	-0.155	-0.155	-0.155	-0.156	-0.156	-0.142	-0.089	-0.031	0	0	0.001	0.004	0	0	0	0	0	0
								Medium_Lowland	PAN2423	40	2	2016-12-20	2016	fallow	0	0	0	?	0	0	0	1	1	1	1	?	?	?	?	0	0.003	-0.154	-0.154	-0.155	-0.155	-0.155	-0.14	-0.089	-0.032	0	0	0.001	0.003	0	0	0	0	0	0
								Medium_Lowland	PAN2423	40	2	2016-12-21	2016	fallow	0	0	0	?	0	0	0	1	1	1	1	?	?	?	?	0	0.002	-0.152	-0.153	-0.154	-0.154	-0.153	-0.138	-0.088	-0.032	0	0	0	0.002	0	0	0	0	0	0
								Medium_Lowland	PAN2423	40	2	2016-12-22	2016	fallow	0	0	0	?	0	0	0	1	1	1	1	?	?	?	?	0	0.002	-0.151	-0.152	-0.153	-0.153	-0.152	-0.136	-0.087	-0.033	0	0	0	0.002	0	0	0	0	0	0
								Medium_Lowland	PAN2423	40	2	2016-12-23	2016	fallow	0	0	0	?	0	0	0	1	1	1	1	?	?	?	?	0	0.001	-0.15	-0.151	-0.152	-0.152	-0.15	-0.135	-0.086	-0.033	0	0	0	0.001	0	0	0	0	0	0
								Medium_Lowland	PAN2423	40	2	2016-12-24	2016	fallow	0	0	0	?	0	0	0	1	1	1	1	?	?	?	?	0	0.001	-0.148	-0.15	-0.151	-0.15	-0.149	-0.133	-0.086	-0.034	0	0	0	0.001	0	0	0	0	0	0
								Medium_Lowland	PAN2423	40	2	2016-12-25	2016	fallow	0	0	0	?	0	0	0	1	1	1	1	?	?	?	?	0	0.001	-0.147	-0.148	-0.149	-0.149	-0.147	-0.131	-0.085	-0.034	0	0	0	0.001	0	0	0	0	0	0
								Medium_Lowland	PAN2423	40	2	2016-12-26	2016	fallow	0	0	0	?	0	0	0	1	1	1	1	?	?	?	?	0	0.001	-0.145	-0.147	-0.148	-0.147	-0.146	-0.13	-0.084	-0.034	0	0	0	0.001	0	0	0	0	0	0
								Medium_Lowland	PAN2423	40	2	2016-12-27	2016	fallow	0	0	0	?	0	0	0	1	1	1	1	?	?	?	?	0	0	-0.144	-0.145	-0.146	-0.146	-0.144	-0.128	-0.084	-0.035	0	0	0	0	0	0	0	0	0	0
								Medium_Lowland	PAN2423	40	2	2016-12-28	2016	fallow	0	0	0	?	0	0	0	1	1	1	1	?	?	?	?	0	0	-0.142	-0.144	-0.145	-0.145	-0.143	-0.127	-0.083	-0.035	0	0	0	0	0	0	0	0	0	0
								Medium_Lowland	PAN2423	40	2	2016-12-29	2016	fallow	0	0	0	?	0	0	0	1	1	1	1	?	?	?	?	0	0	-0.141	-0.142	-0.143	-0.143	-0.141	-0.126	-0.083	-0.035	0	0	0	0	0	0	0	0	0	0
								Medium_Lowland	PAN2423	40	2	2016-12-30	2016	fallow	0	0	0	?	0	0	0	1	1	1	1	?	?	?	?	0	0	-0.139	-0.141	-0.142	-0.142	-0.14	-0.124	-0.082	-0.035	0	0	0	0	0	0	0	0	0	0
								Medium_Lowland	PAN2423	40	2	2016-12-31	2016	fallow	0	0	0	?	0	0	0	1	1	1	1	?	?	?	?	0	0	-0.138	-0.14	-0.14	-0.14	-0.138	-0.123	-0.082	-0.036	0	0	0	0	0	0	0	0	0	0
								Medium_Lowland	PAN2423	40	2	2017-01-01	2017	fallow	0	0	0	?	0	0	0	1	1	1	1	?	?	?	?	0	0	-0.137	-0.138	-0.139	-0.139	-0.137	-0.122	-0.081	-0.036	0	0	0	0	0	0	0	0	0	0
								Medium_Lowland	PAN2423	40	2	2017-01-02	2017	fallow	0	0	0	?	0	0.86	0	1	1	1	1	?	?	?	?	0	0	0.438	0.207	0.059	0.003	-0.113	-0.119	-0.08	-0.036	0	0	0	0	0	0	0	0	0	0
								Medium_Lowland	PAN2423	40	2	2017-01-03	2017	fallow	0	0	0	?	0	1.15	0	1	1	1	1	?	?	?	?	0	0	0.464	0.302	0.174	0.092	-0.079	-0.116	-0.08	-0.036	0	0	0	0	0	0	0	0	0	0
								Medium_Lowland	PAN2423	40	2	2017-01-04	2017	fallow	0	0	0	?	0	0.12	0	1	1	1	1	?	?	?	?	0	0	0.279	0.237	0.174	0.102	-0.05	-0.111	-0.079	-0.036	0	0	0	0	0	0	0	0	0	0
								Medium_Lowland	PAN2423	40	2	2017-01-05	2017	fallow	0	0	0	?	0	0.04	0	1	1	1	1	?	?	?	?	0	0	0.116	0.139	0.123	0.074	-0.033	-0.105	-0.078	-0.036	0	0	0	0	0	0	0	0	0	0
								Medium_Lowland	PAN2423	40	2	2017-01-06	2017	fallow	0	0	0	?	0	0	0	1	1	1	1	?	?	?	?	0	0	-0.04	0.025	0.046	0.024	-0.029	-0.1	-0.078	-0.036	0	0	0	0	0	0	0	0	0	0
								Medium_Lowland	PAN2423	40	2	2017-01-07	2017	fallow	0	0	0	?	0	0	0	1	1	1	1	?	?	?	?	0	0	-0.077	-0.028	-0.006	-0.012	-0.033	-0.096	-0.077	-0.036	0	0	0	0	0	0	0	0	0	0
								Medium_Lowland	PAN2423	40	2	2017-01-08	2017	fallow	0	0	0	?	0	0	0	1	1	1	1	?	?	?	?	0	0	-0.094	-0.059	-0.039	-0.037	-0.041	-0.092	-0.076	-0.036	0	0	0	0	0	0	0	0	0	0
								Medium_Lowland	PAN2423	40	2	2017-01-09	2017	fallow	0	0	0	?	0	0	0	1	1	1	1	?	?	?	?	0	0	-0.104	-0.078	-0.061	-0.055	-0.049	-0.089	-0.075	-0.036	0	0	0	0	0	0	0	0	0	0
								Medium_Lowland	PAN2423	40	2	2017-01-10	2017	fallow	0	0	0	?	0	0.01	0	1	1	1	1	?	?	?	?	0	0	-0.103	-0.086	-0.073	-0.066	-0.057	-0.086	-0.074	-0.036	0	0	0	0	0	0	0	0	0	0
								Medium_Lowland	PAN2423	40	2	2017-01-11	2017	fallow	0	0	0	?	0	0	0	1	1	1	1	?	?	?	?	0	0	-0.112	-0.096	-0.083	-0.076	-0.064	-0.085	-0.073	-0.036	0	0	0	0	0	0	0	0	0	0
								Medium_Lowland	PAN2423	40	2	2017-01-12	2017	fallow	0	0	0	?	0	0	0	1	1	1	1	?	?	?	?	0	0	-0.114	-0.102	-0.091	-0.083	-0.07	-0.083	-0.072	-0.036	0	0	0	0	0	0	0	0	0	0
								Medium_Lowland	PAN2423	40	2	2017-01-13	2017	fallow	0	0	0	?	0	0	0	1	1	1	1	?	?	?	?	0	0	-0.116	-0.106	-0.096	-0.088	-0.075	-0.082	-0.071	-0.035	0	0	0	0	0	0	0	0	0	0
								Medium_Lowland	PAN2423	40	2	2017-01-14	2017	fallow	0	0	0	?	0	0	0	1	1	1	1	?	?	?	?	0	0	-0.116	-0.108	-0.1	-0.093	-0.079	-0.082	-0.07	-0.035	0	0	0	0	0	0	0	0	0	0
								Medium_Lowland	PAN2423	40	2	2017-01-15	2017	fallow	0	0	0	?	0	0	0	1	1	1	1	?	?	?	?	0	0	-0.117	-0.11	-0.102	-0.096	-0.082	-0.081	-0.069	-0.035	0	0	0	0	0	0	0	0	0	0
								Medium_Lowland	PAN2423	40	2	2017-01-16	2017	fallow	0	0	0	?	0	0	0	1	1	1	1	?	?	?	?	0	0	-0.117	-0.111	-0.104	-0.098	-0.085	-0.081	-0.069	-0.035	0	0	0	0	0	0	0	0	0	0
								Medium_Lowland	PAN2423	40	2	2017-01-17	2017	fallow	0	0	0	?	0	0	0	1	1	1	1	?	?	?	?	0	0	-0.116	-0.112	-0.106	-0.1	-0.088	-0.081	-0.068	-0.035	0	0	0	0	0	0	0	0	0	0
								Medium_Lowland	PAN2423	40	2	2017-01-18	2017	fallow	0	0	0	?	0	0	0	1	1	1	1	?	?	?	?	0	0	-0.116	-0.112	-0.107	-0.101	-0.089	-0.081	-0.067	-0.035	0	0	0	0	0	0	0	0	0	0
								Medium_Lowland	PAN2423	40	2	2017-01-19	2017	fallow	0	0	0	?	0	0	0	1	1	1	1	?	?	?	?	0	0	-0.116	-0.112	-0.107	-0.102	-0.091	-0.081	-0.066	-0.034	0	0	0	0	0	0	0	0	0	0
								Medium_Lowland	PAN2423	40	2	2017-01-20	2017	fallow	0	0	0	?	0	0	0	1	1	1	1	?	?	?	?	0	0	-0.115	-0.112	-0.108	-0.103	-0.092	-0.08	-0.066	-0.034	0	0	0	0	0	0	0	0	0	0
								Medium_Lowland	PAN2423	40	2	2017-01-21	2017	fallow	0	0	0	?	0	0	0	1	1	1	1	?	?	?	?	0	0	-0.115	-0.112	-0.108	-0.103	-0.093	-0.08	-0.065	-0.034	0	0	0	0	0	0	0	0	0	0
								Medium_Lowland	PAN2423	40	2	2017-01-22	2017	fallow	0	0	0	?	0	0	0	1	1	1	1	?	?	?	?	0	0	-0.114	-0.112	-0.108	-0.104	-0.094	-0.081	-0.065	-0.034	0	0	0	0	0	0	0	0	0	0
								Medium_Lowland	PAN2423	40	2	2017-01-23	2017	fallow	0	0	0	?	0	0	0	1	1	1	1	?	?	?	?	0	0	-0.113	-0.111	-0.108	-0.104	-0.094	-0.081	-0.064	-0.033	0	0	0	0	0	0	0	0	0	0
								Medium_Lowland	PAN2423	40	2	2017-01-24	2017	fallow	0	0	0	?	0	0	0	1	1	1	1	?	?	?	?	0	0	-0.113	-0.111	-0.108	-0.104	-0.094	-0.081	-0.064	-0.033	0	0	0	0	0	0	0	0	0	0
								Medium_Lowland	PAN2423	40	2	2017-01-25	2017	fallow	0	0	0	?	0	0	0	1	1	1	1	?	?	?	?	0	0	-0.112	-0.11	-0.108	-0.104	-0.095	-0.081	-0.063	-0.033	0	0	0	0	0	0	0	0	0	0
								Medium_Lowland	PAN2423	40	2	2017-01-26	2017	fallow	0	0	0	?	0	0	0	1	1	1	1	?	?	?	?	0	0	-0.112	-0.11	-0.107	-0.104	-0.095	-0.081	-0.063	-0.033	0	0	0	0	0	0	0	0	0	0
								Medium_Lowland	PAN2423	40	2	2017-01-27	2017	fallow	0	0	0	?	0	0.01	0	1	1	1	1	?	?	?	?	0	0	-0.104	-0.106	-0.105	-0.102	-0.095	-0.08	-0.062	-0.033	0	0	0	0	0	0	0	0	0	0
								Medium_Lowland	PAN2423	40	2	2017-01-28	2017	fallow	0	0	0	?	0	0.01	0	1	1	1	1	?	?	?	?	0	0	-0.102	-0.103	-0.103	-0.1	-0.094	-0.08	-0.062	-0.032	0	0	0	0	0	0	0	0	0	0
								Medium_Lowland	PAN2423	40	2	2017-01-29	2017	fallow	0	0	0	?	0	0	0	1	1	1	1	?	?	?	?	0	0	-0.108	-0.106	-0.103	-0.101	-0.094	-0.08	-0.061	-0.032	0	0	0	0	0	0	0	0	0	0
								Medium_Lowland	PAN2423	40	2	2017-01-30	2017	fallow	0	0	0	?	0	0	0	1	1	1	1	?	?	?	?	0	0	-0.108	-0.106	-0.104	-0.101	-0.094	-0.08	-0.061	-0.032	0	0	0	0	0	0	0	0	0	0
								Medium_Lowland	PAN2423	40	2	2017-01-31	2017	fallow	0	0	0	?	0	0	0	1	1	1	1	?	?	?	?	0	0	-0.108	-0.106	-0.104	-0.101	-0.094	-0.08	-0.06	-0.032	0	0	0	0	0	0	0	0	0	0
								Medium_Lowland	PAN2423	40	2	2017-02-01	2017	fallow	0	0	0	?	0	0	0	1	1	1	1	?	?	?	?	0	0	-0.108	-0.106	-0.104	-0.101	-0.094	-0.08	-0.06	-0.032	-0.001	0	0	0	0	0	0	0	0	0
								Medium_Lowland	PAN2423	40	2	2017-02-02	2017	fallow	0	0	0	?	0	0	0	1	1	1	1	?	?	?	?	0	0	-0.107	-0.106	-0.104	-0.101	-0.093	-0.08	-0.06	-0.031	-0.002	0	0	0	0	0	0	0	0	0
								Medium_Lowland	PAN2423	40	2	2017-02-03	2017	fallow	0	0	0	?	0	0	0	1	1	1	1	?	?	?	?	0	0	-0.107	-0.105	-0.103	-0.101	-0.093	-0.079	-0.059	-0.031	-0.003	0	0	0	0	0	0	0	0	0
								Medium_Lowland	PAN2423	40	2	2017-02-04	2017	fallow	0	0	0	?	0	0	0	1	1	1	1	?	?	?	?	0	0	-0.106	-0.105	-0.103	-0.1	-0.093	-0.079	-0.059	-0.031	-0.004	0	0	0	0	0	0	0	0	0
								Medium_Lowland	PAN2423	40	2	2017-02-05	2017	fallow	0	0	0	?	0	0	0	1	1	1	1	?	?	?	?	0	0	-0.105	-0.105	-0.103	-0.1	-0.093	-0.079	-0.058	-0.031	-0.005	0	0	0	0	0	0	0	0	0
								Medium_Lowland	PAN2423	40	2	2017-02-06	2017	fallow	0	0	0	?	0	0	0	1	1	1	1	?	?	?	?	0	0	-0.105	-0.104	-0.102	-0.1	-0.093	-0.079	-0.058	-0.031	-0.005	0	0	0	0	0	0	0	0	0
								Medium_Lowland	PAN2423	40	2	2017-02-07	2017	fallow	0	0	0	?	0	0	0	1	1	1	1	?	?	?	?	0	0	-0.104	-0.104	-0.102	-0.099	-0.092	-0.079	-0.058	-0.031	-0.006	0	0	0	0	0	0	0	0	0
								Medium_Lowland	PAN2423	40	2	2017-02-08	2017	fallow	0	0	0	?	0	0	0	1	1	1	1	?	?	?	?	0	0	-0.104	-0.103	-0.101	-0.099	-0.092	-0.079	-0.058	-0.031	-0.007	0	0	0	0	0	0	0	0	0
								Medium_Lowland	PAN2423	40	2	2017-02-09	2017	fallow	0	0	0	?	0	0	0	1	1	1	1	?	?	?	?	0	0	-0.103	-0.103	-0.101	-0.098	-0.092	-0.078	-0.057	-0.031	-0.007	0	0	0	0	0	0	0	0	0
								Medium_Lowland	PAN2423	40	2	2017-02-10	2017	fallow	0	0	0	?	0	0	0	1	1	1	1	?	?	?	?	0	0	-0.103	-0.102	-0.1	-0.098	-0.091	-0.078	-0.057	-0.031	-0.008	0	0	0	0	0	0	0	0	0
								Medium_Lowland	PAN2423	40	2	2017-02-11	2017	fallow	0	0	0	?	0	0	0	1	1	1	1	?	?	?	?	0	0	-0.102	-0.102	-0.1	-0.098	-0.091	-0.078	-0.057	-0.031	-0.008	0	0	0	0	0	0	0	0	0
								Medium_Lowland	PAN2423	40	2	2017-02-12	2017	fallow	0	0	0	?	0	0	0	1	1	1	1	?	?	?	?	0	0	-0.102	-0.101	-0.1	-0.097	-0.091	-0.078	-0.056	-0.031	-0.009	0	0	0	0	0	0	0	0	0
								Medium_Lowland	PAN2423	40	2	2017-02-13	2017	fallow	0	0	0	?	0	0	0	1	1	1	1	?	?	?	?	0	0	-0.101	-0.101	-0.099	-0.097	-0.091	-0.077	-0.056	-0.031	-0.009	0	0	0	0	0	0	0	0	0
								Medium_Lowland	PAN2423	40	2	2017-02-14	2017	fallow	0	0	0	?	0	0	0	1	1	1	1	?	?	?	?	0	0	-0.101	-0.1	-0.099	-0.096	-0.09	-0.077	-0.056	-0.031	-0.01	0	0	0	0	0	0	0	0	0
								Medium_Lowland	PAN2423	40	2	2017-02-15	2017	fallow	0	0	0	?	0	0	0	1	1	1	1	?	?	?	?	0	0	-0.1	-0.1	-0.098	-0.096	-0.09	-0.077	-0.056	-0.031	-0.01	0	0	0	0	0	0	0	0	0
								Medium_Lowland	PAN2423	40	2	2017-02-16	2017	fallow	0	0	0	?	0	0	0	1	1	1	1	?	?	?	?	0	0	-0.1	-0.099	-0.098	-0.095	-0.089	-0.077	-0.055	-0.031	-0.01	0	0	0	0	0	0	0	0	0
								Medium_Lowland	PAN2423	40	2	2017-02-17	2017	fallow	0	0	0	?	0	0	0	1	1	1	1	?	?	?	?	0	0	-0.099	-0.099	-0.097	-0.095	-0.089	-0.076	-0.055	-0.031	-0.011	0	0	0	0	0	0	0	0	0
								Medium_Lowland	PAN2423	40	2	2017-02-18	2017	fallow	0	0	0	?	0	0	0	1	1	1	1	?	?	?	?	0	0	-0.099	-0.098	-0.097	-0.095	-0.089	-0.076	-0.055	-0.031	-0.011	0	0	0	0	0	0	0	0	0
								Medium_Lowland	PAN2423	40	2	2017-02-19	2017	fallow	0	0	0	?	0	0	0	1	1	1	1	?	?	?	?	0	0	-0.098	-0.098	-0.096	-0.094	-0.088	-0.076	-0.055	-0.031	-0.011	0	0	0	0	0	0	0	0	0
								Medium_Lowland	PAN2423	40	2	2017-02-20	2017	fallow	0	0	0	?	0	0	0	1	1	1	1	?	?	?	?	0	0	-0.098	-0.097	-0.096	-0.094	-0.088	-0.076	-0.055	-0.031	-0.012	0	0	0	0	0	0	0	0	0
								Medium_Lowland	PAN2423	40	2	2017-02-21	2017	fallow	0	0	0	?	0	0.01	0	1	1	1	1	?	?	?	?	0	0	-0.091	-0.093	-0.093	-0.092	-0.087	-0.075	-0.054	-0.031	-0.012	0	0	0	0	0	0	0	0	0
								Medium_Lowland	PAN2423	40	2	2017-02-22	2017	fallow	0	0	0	?	0	0.01	0	1	1	1	1	?	?	?	?	0	0	-0.089	-0.091	-0.091	-0.09	-0.087	-0.075	-0.054	-0.031	-0.012	0	0	0	0	0	0	0	0	0
								Medium_Lowland	PAN2423	40	2	2017-02-23	2017	fallow	0	0	0	?	0	0.17	0	1	1	1	1	?	?	?	?	0	0	0.019	-0.025	-0.053	-0.063	-0.081	-0.074	-0.054	-0.031	-0.012	0	0	0	0	0	0	0	0	0
								Medium_Lowland	PAN2423	40	2	2017-02-24	2017	fallow	0	0	0	?	0	0.02	0	1	1	1	1	?	?	?	?	0	0	-0.059	-0.057	-0.059	-0.065	-0.078	-0.074	-0.054	-0.031	-0.012	0	0	0	0	0	0	0	0	0
								Medium_Lowland	PAN2423	40	2	2017-02-25	2017	fallow	0	0	0	?	0	0	0	1	1	1	1	?	?	?	?	0	0	-0.083	-0.073	-0.07	-0.072	-0.076	-0.073	-0.053	-0.031	-0.013	0	0	0	0	0	0	0	0	0
								Medium_Lowland	PAN2423	40	2	2017-02-26	2017	fallow	0	0	0	?	0	0	0	1	1	1	1	?	?	?	?	0	0	-0.088	-0.081	-0.077	-0.077	-0.076	-0.072	-0.053	-0.031	-0.013	0	0	0	0	0	0	0	0	0
								Medium_Lowland	PAN2423	40	2	2017-02-27	2017	fallow	0	0	0	?	0	0	0	1	1	1	1	?	?	?	?	0	0	-0.09	-0.085	-0.081	-0.08	-0.076	-0.072	-0.053	-0.031	-0.013	0	0	0	0	0	0	0	0	0
								Medium_Lowland	PAN2423	40	2	2017-02-28	2017	fallow	0	0	0	?	0	0	0	1	1	1	1	?	?	?	?	0	0	-0.091	-0.087	-0.084	-0.082	-0.077	-0.071	-0.053	-0.031	-0.013	0	0	0	0	0	0	0	0	0
								Medium_Lowland	PAN2423	40	2	2017-03-01	2017	fallow	0	0	0	?	0	0	0	1	1	1	1	?	?	?	?	0	0	-0.092	-0.089	-0.086	-0.083	-0.077	-0.071	-0.053	-0.031	-0.013	0	0	0	0	0	0	0	0	0
								Medium_Lowland	PAN2423	40	2	2017-03-02	2017	fallow	0	0	0	?	0	0	0	1	1	1	1	?	?	?	?	0	0	-1.086	-0.686	-0.428	-0.328	-0.118	-0.072	-0.053	-0.031	-0.013	0	0	0	0	0	0	0	0	0
								Medium_Lowland	PAN2423	40	2	2017-03-03	2017	fallow	0	0	0	?	0	0	0	1	1	1	1	?	?	?	?	0	0	-0.375	-0.396	-0.367	-0.289	-0.14	-0.075	-0.052	-0.031	-0.014	0	0	0	0	0	0	0	0	0
								Medium_Lowland	PAN2423	40	2	2017-03-04	2017	fallow	0	0	0	?	0	0	0	1	1	1	1	?	?	?	?	0	0	-0.277	-0.313	-0.303	-0.249	-0.15	-0.078	-0.052	-0.031	-0.014	0	0	0	0	0	0	0	0	0
								Medium_Lowland	PAN2423	40	2	2017-03-05	2017	fallow	0	0	0	?	0	1.24	0	1	1	1	1	?	?	?	?	0	0	-0.248	-0.27	-0.261	-0.225	-0.154	-0.08	-0.052	-0.031	-0.014	0	0	0	0	0	0	0	0	0
								Medium_Lowland	PAN2423	40	2	2017-03-06	2017	fallow	0	0	0	?	0	1.46	0	1	1	1	1	?	?	?	?	0	0	-0.232	-0.244	-0.236	-0.21	-0.155	-0.083	-0.052	-0.031	-0.014	0	0	0	0	0	0	0	0	0
								Medium_Lowland	PAN2423	40	2	2017-03-07	2017	fallow	0	0	0	?	0	0.07	0	1	1	1	1	?	?	?	?	0	0	-0.222	-0.227	-0.22	-0.199	-0.154	-0.085	-0.053	-0.031	-0.014	0	0	0	0	0	0	0	0	0
								Medium_Lowland	PAN2423	40	2	2017-03-08	2017	fallow	0	0	0	?	0	14.6	0	1	1	1	1	?	?	?	?	0	0	12.946	11.514	8.78	5.362	2.315	0.055	-0.05	-0.031	-0.014	0	0	0	0	0	0	0	0	0
								Medium_Lowland	PAN2423	40	2	2017-03-09	2017	fallow	0	0	0	?	0	2.89	0	1	1	1	1	?	?	?	?	0	0	0.746	1.772	1.772	1.772	1.172	0.35	-0.041	-0.031	-0.014	0	0	0	0	0	0	0	0	0
								Medium_Lowland	PAN2423	40	2	2017-03-10	2017	fallow	0	0	0	?	0	10.68	0	1	1	1	1	?	?	?	?	0	0	8.246	8.317	8.317	8.317	4.488	2.156	0.014	-0.03	-0.014	0	0	0	0	0	0	0	0	0.1
								Medium_Lowland	PAN2423	40	2	2017-03-11	2017	fallow	0	0	0	?	0	35.29	0	1	1	1	1	?	?	?	?	0	0	21.408	21.408	21.408	21.408	21.408	12	4.638	0.112	-0.01	0	0	0	0	0	0	0	0	0.2
								Medium_Lowland	PAN2423	40	2	2017-03-12	2017	fallow	0	0	0	?	0	4.3	0	1	1	1	1	?	?	?	?	0	0	1.83	1.83	1.83	1.83	2.5	4.8	4.513	1.286	0.036	0	0	0	0	0	0	0	0	0
								Medium_Lowland	PAN2423	40	2	2017-03-13	2017	fallow	0	0	0	?	0	0.12	0	1	1	1	1	?	?	?	?	0	0	-1.096	-1.297	0.855	1.14	2.5	4.8	4.628	2.054	0.352	0	0	0	0	0	0	0	0	0
								Medium_Lowland	PAN2423	40	2	2017-03-14	2017	fallow	0	0	0	?	0	0	0	1	1	1	1	?	?	?	?	0	0.026	-1.163	-0.698	-1.067	0.997	1.984	3.753	4.278	2.721	0.963	0.287	0.086	0.026	0	0	0	0	0	0
								Medium_Lowland	PAN2423	40	2	2017-03-15	2017	fallow	0	0	0	?	0	0	0	1	1	1	1	?	?	?	?	0	0.097	-1.008	-1.032	-0.589	-0.659	0.992	2.649	3.626	2.993	1.572	0.673	0.262	0.097	0	0	0	0	0	0
								Medium_Lowland	PAN2423	40	2	2017-03-16	2017	fallow	0	0	0	?	0	0	0	1	1	1	1	?	?	?	?	0	0.219	-1.016	-0.845	-0.765	0	0.167	1.656	2.838	2.947	1.984	1.066	0.503	0.219	0	0	0	0	0	0
								Medium_Lowland	PAN2423	40	2	2017-03-17	2017	fallow	0	0	0	?	0	0.08	0	1	1	1	1	?	?	?	?	0	0.385	-0.863	-0.824	-0.471	-0.867	0.083	1.027	2.114	2.697	2.198	1.406	0.774	0.385	0	0	0	0	0	0
								Medium_Lowland	PAN2423	40	2	2017-03-18	2017	fallow	0	0	0	?	0	0.25	0	1	1	1	1	?	?	?	?	0	0.581	-0.777	-0.654	-0.745	-0.532	-0.405	0.616	1.515	2.342	2.241	1.656	1.039	0.581	0	0	0	0	0	0
								Medium_Lowland	PAN2423	40	2	2017-03-19	2017	fallow	0	0	0	?	0	2.26	0	1	1	1	1	?	?	?	?	0	0.787	-0.358	-0.513	-0.521	-0.488	-0.322	0.208	0.992	1.937	2.15	1.804	1.268	0.787	0	0	0	0	0	0
								Medium_Lowland	PAN2423	40	2	2017-03-20	2017	fallow	0	0	0	?	0	11.77	0	1	1	1	1	?	?	?	?	0	0.985	8.834	8.416	5.857	2.961	0.942	0.373	0.744	1.579	1.979	1.857	1.445	0.985	0	0	0	0	0	0
								Medium_Lowland	PAN2423	40	2	2017-03-21	2017	fallow	0	0	0	?	0	0	0	1	1	1	1	?	?	?	?	0	1.158	-1.096	-1.297	0.855	1.14	1.041	0.64	0.703	1.316	1.78	1.834	1.562	1.158	0	0	0	0	0	0
								Medium_Lowland	PAN2423	40	2	2017-03-22	2017	fallow	0	0	0	?	0	0.12	0	1	1	1	1	?	?	?	?	0	1.297	-1.163	-0.698	-1.067	0.997	1.019	0.792	0.738	1.143	1.589	1.76	1.621	1.297	0	0	0	0	0	0
								Medium_Lowland	PAN2423	40	2	2017-03-23	2017	fallow	0	0	0	?	0	0	0	1	1	1	1	?	?	?	?	0	1.35	-1.008	-1.032	-0.589	-0.576	0.51	0.679	0.715	1.014	1.417	1.657	1.632	1.35	0	0	0	0	0	0
								Medium_Lowland	PAN2423	40	2	2017-03-24	2017	fallow	0	0	0	?	0	0	0	1	1	1	1	?	?	?	?	0	1.35	-1.016	-0.845	-0.73	-0.521	-0.179	0.407	0.592	0.888	1.258	1.537	1.604	1.35	0	0	0	0	0	0
								Medium_Lowland	PAN2423	40	2	2017-03-25	2017	fallow	0	0	0	?	0	0	0	1	1	1	1	?	?	?	?	0	1.35	-0.959	-0.867	-0.719	-0.565	-0.22	0.173	0.424	0.749	1.105	1.408	1.545	1.35	0	0	0	0	0	0
								Medium_Lowland	PAN2423	40	2	2017-03-26	2017	fallow	0	0	0	?	0	0.03	0	1	1	1	1	?	?	?	?	0	1.35	-0.92	-0.84	-0.722	-0.579	-0.264	0.016	0.261	0.602	0.954	1.272	1.463	1.35	0	0	0	0	0	0
								Medium_Lowland	PAN2423	40	2	2017-03-27	2017	fallow	0	0	0	?	0	0.01	0	1	1	1	1	?	?	?	?	0	1.35	-0.813	-0.776	-0.692	-0.57	-0.286	-0.135	0.156	0.468	0.808	1.133	1.364	1.35	0	0	0	0	0	0
								Medium_Lowland	PAN2423	40	2	2017-03-28	2017	fallow	0	0	0	?	0	0.01	0	1	1	1	1	?	?	?	?	0	1.35	-0.729	-0.714	-0.652	-0.548	-0.312	-0.137	0.04	0.34	0.668	0.993	1.253	1.35	0	0	0	0	0	0
								Medium_Lowland	PAN2423	40	2	2017-03-29	2017	fallow	0	0	0	?	0	0.03	0	1	1	1	1	?	?	?	?	0	1.35	-0.663	-0.659	-0.611	-0.526	-0.323	-0.141	-0.197	0.238	0.539	0.857	1.134	1.35	0	0	0	0	0	0
								Medium_Lowland	PAN2423	40	2	2017-03-30	2017	fallow	0	0	0	?	0	0.03	0	1	1	1	1	?	?	?	?	0	1.35	-0.611	-0.611	-0.574	-0.476	-0.323	-0.156	-0.177	0.107	0.409	0.723	1.011	1.35	0	0	0	0	0	0
								Medium_Lowland	PAN2423	40	2	2017-03-31	2017	fallow	0	0	0	?	0	0.01	0	1	1	1	1	?	?	?	?	0	1.235	-0.568	-0.571	-0.53	-0.449	-0.32	-0.167	0	0.022	0.293	0.594	0.886	1.235	0	0	0	0	0	0
								Medium_Lowland	PAN2423	40	2	2017-04-01	2017	fallow	0	0	0	?	0	0.02	0	1	1	1	1	?	?	?	?	0	1.093	-0.533	-0.532	-0.496	-0.428	-0.316	-0.166	-0.175	0.016	0.21	0.479	0.763	1.093	0	0	0	0	0	0
								Medium_Lowland	PAN2423	40	2	2017-04-02	2017	fallow	0	0	0	?	0	0.04	0	1	1	1	1	?	?	?	?	0	0.96	-0.501	-0.499	-0.469	-0.411	-0.311	-0.175	-0.167	0	0.147	0.379	0.648	0.96	0	0	0	0	0	0
								Medium_Lowland	PAN2423	40	2	2017-04-03	2017	fallow	0	0	0	?	0	0.15	0	1	1	1	1	?	?	?	?	0	0.835	-0.474	-0.472	-0.446	-0.395	-0.306	-0.182	-0.159	0	0.103	0.296	0.543	0.835	0	0	0	0	0	0
								Medium_Lowland	PAN2423	40	2	2017-04-04	2017	fallow	0	0	0	?	0	0.25	0	1	1	1	1	?	?	?	?	0	0.719	-0.452	-0.449	-0.426	-0.382	-0.302	-0.188	-0.153	0	0.072	0.229	0.449	0.719	0	0	0	0	0	0
								Medium_Lowland	PAN2423	40	2	2017-04-05	2017	fallow	0	0	0	?	0	0.28	0	1	1	1	1	?	?	?	?	0	0.613	-0.432	-0.43	-0.409	-0.37	-0.297	-0.192	-0.147	0	0.05	0.175	0.367	0.613	0	0	0	0	0	0
								Medium_Lowland	PAN2423	40	2	2017-04-06	2017	fallow	0	0	0	?	0	0.37	0	1	1	1	1	?	?	?	?	0	0.518	-0.415	-0.413	-0.394	-0.359	-0.293	-0.194	-0.142	0	0.035	0.133	0.297	0.518	0	0	0	0	0	0
								Medium_Lowland	PAN2423	40	2	2017-04-07	2017	fallow	0	0	0	?	0	0.2	0	1	1	1	1	?	?	?	?	0	0.434	-0.4	-0.398	-0.381	-0.35	-0.289	-0.196	-0.137	0	0.025	0.101	0.238	0.434	0	0	0	0	0	0
								Medium_Lowland	PAN2423	40	2	2017-04-08	2017	fallow	0	0	0	?	0	0.63	0	1	1	1	1	?	?	?	?	0	0.361	-0.386	-0.384	-0.369	-0.341	-0.285	-0.198	-0.133	0	0.017	0.076	0.189	0.361	0	0	0	0	0	0
								Medium_Lowland	PAN2423	40	2	2017-04-09	2017	fallow	0	0	0	?	0	0.94	0	1	1	1	1	?	?	?	?	0	0.297	-0.374	-0.372	-0.359	-0.333	-0.282	-0.198	-0.129	0	0.012	0.057	0.149	0.297	0	0	0	0	0	0
								Medium_Lowland	PAN2423	40	2	2017-04-10	2017	fallow	0	0	0	?	0	0.11	0	1	1	1	1	?	?	?	?	0	0.243	-0.363	-0.361	-0.349	-0.326	-0.278	-0.198	-0.126	0	0.008	0.042	0.117	0.243	0	0	0	0	0	0
								Medium_Lowland	PAN2423	40	2	2017-04-11	2017	fallow	0	0	0	?	0	0.02	0	1	1	1	1	?	?	?	?	0	0.198	-0.353	-0.351	-0.34	-0.319	-0.274	-0.198	-0.122	0	0.006	0.031	0.091	0.198	0	0	0	0	0	0
								Medium_Lowland	PAN2423	40	2	2017-04-12	2017	fallow	0	0	0	?	0	0	0	1	1	1	1	?	?	?	?	0	0.16	-0.343	-0.342	-0.332	-0.313	-0.271	-0.198	-0.119	0	0.004	0.023	0.071	0.16	0	0	0	0	0	0
								Medium_Lowland	PAN2423	40	2	2017-04-13	2017	fallow	0	0	0	?	0	0	0	1	1	1	1	?	?	?	?	0	0.128	-0.335	-0.334	-0.325	-0.307	-0.268	-0.197	-0.117	0	0.003	0.017	0.055	0.128	0	0	0	0	0	0
								Medium_Lowland	PAN2423	40	2	2017-04-14	2017	fallow	0	0	0	?	0	0	0	1	1	1	1	?	?	?	?	0	0.102	-0.327	-0.326	-0.318	-0.301	-0.264	-0.196	-0.114	-0.004	0.002	0.013	0.042	0.102	0	0	0	0	0	0
								Medium_Lowland	PAN2423	40	2	2017-04-15	2017	fallow	0	0	0	?	0	0	0	1	1	1	1	?	?	?	?	0	0.081	-0.319	-0.319	-0.311	-0.296	-0.261	-0.194	-0.112	-0.007	0	0.009	0.032	0.081	0	0	0	0	0	0
								Medium_Lowland	PAN2423	40	2	2017-04-16	2017	fallow	0	0	0	?	0	0.18	0	1	1	1	1	?	?	?	?	0	0.064	-0.312	-0.312	-0.305	-0.291	-0.258	-0.193	-0.11	-0.011	0	0.006	0.024	0.064	0	0	0	0	0	0
								Medium_Lowland	PAN2423	40	2	2017-04-17	2017	fallow	0	0	0	?	0	0.26	0	1	1	1	1	?	?	?	?	0	0.05	-0.306	-0.305	-0.299	-0.286	-0.254	-0.191	-0.108	-0.014	0	0.004	0.018	0.05	0	0	0	0	0	0
								Medium_Lowland	PAN2423	40	2	2017-04-18	2017	fallow	0	0	0	?	0	0.35	0	1	1	1	1	?	?	?	?	0	0.039	-0.3	-0.299	-0.294	-0.281	-0.251	-0.19	-0.107	-0.016	0	0.003	0.014	0.039	0	0	0	0	0	0
								Medium_Lowland	PAN2423	40	2	2017-04-19	2017	fallow	0	0	0	?	0	3.67	0	1	1	1	1	?	?	?	?	0	0.031	0.89	0.417	0.118	-0.11	-0.231	-0.188	-0.106	-0.019	0	0.002	0.01	0.031	0	0	0	0	0	0
								Medium_Lowland	PAN2423	40	2	2017-04-20	2017	fallow	0	0	0	?	0	3.43	0	1	1	1	1	?	?	?	?	0	0.024	0.788	0.52	0.25	0.069	-0.192	-0.184	-0.104	-0.021	0	0.001	0.008	0.024	0	0	0	0	0	0
								Medium_Lowland	PAN2423	40	2	2017-04-21	2017	fallow	0	0	0	?	0	2.95	0	1	1	1	1	?	?	?	?	0	0.018	0.484	0.39	0.253	0.134	-0.149	-0.178	-0.103	-0.023	0	0.001	0.006	0.018	0	0	0	0	0	0
								Medium_Lowland	PAN2423	40	2	2017-04-22	2017	fallow	0	0	0	?	0	6.31	0	1	1	1	1	?	?	?	?	0	0.014	3.836	4.008	1.561	1.072	0.059	-0.163	-0.102	-0.024	0	0.001	0.004	0.014	0	0	0	0	0	0
								Medium_Lowland	PAN2423	40	2	2017-04-23	2017	fallow	0	0	0	?	0	6.16	0	1	1	1	1	?	?	?	?	0	0.011	3.69	3.69	3.69	1.419	0.396	-0.132	-0.1	-0.026	0	0.001	0.003	0.011	0	0	0	0	0	0
								Medium_Lowland	PAN2423	40	2	2017-04-24	2017	fallow	0	0	0	?	0	2.71	0	1	1	1	1	?	?	?	?	0	0.008	0.35	0.57	0.855	1.14	0.803	-0.077	-0.096	-0.027	0	0	0.002	0.008	0	0	0	0	0	0
								Medium_Lowland	PAN2423	40	2	2017-04-25	2017	fallow	0	0	0	?	0	0.72	0	1	1	1	1	?	?	?	?	0	0.006	-0.564	-1.052	0.713	1.049	0.85	-0.015	-0.092	-0.028	0	0	0.002	0.006	0	0	0	0	0	0
								Medium_Lowland	PAN2423	40	2	2017-04-26	2017	fallow	0	0	0	?	0	0.16	0	1	1	1	1	?	?	?	?	0	0.005	-0.842	-0.505	-0.695	0.525	0.332	0.049	-0.086	-0.029	0	0	0.001	0.005	0	0	0	0	0	0
								Medium_Lowland	PAN2423	40	2	2017-04-27	2017	fallow	0	0	0	?	0	0.28	0	1	1	1	1	?	?	?	?	0	0.004	-0.609	-0.643	-0.368	-0.392	0.166	0.095	-0.079	-0.03	0	0	0.001	0.004	0	0	0	0	0	0
								Medium_Lowland	PAN2423	40	2	2017-04-28	2017	fallow	0	0	0	?	0	0.8	0	1	1	1	1	?	?	?	?	0	0.003	-0.618	-0.518	-0.464	-0.331	-0.087	0.055	-0.074	-0.03	0	0	0.001	0.003	0	0	0	0	0	0
								Medium_Lowland	PAN2423	40	2	2017-04-29	2017	fallow	0	0	0	?	0	0.18	0	1	1	1	1	?	?	?	?	0	0.002	-0.546	-0.513	-0.435	-0.336	-0.14	-0.035	-0.071	-0.03	0	0	0	0.002	0	0	0	0	0	0
								Medium_Lowland	PAN2423	40	2	2017-04-30	2017	fallow	0	0	0	?	0	2.06	0	1	1	1	1	?	?	?	?	0	0.002	-0.407	-0.418	-0.383	-0.313	-0.167	-0.047	-0.069	-0.031	0	0	0	0.002	0	0	0	0	0	0
								Medium_Lowland	PAN2423	40	2	2017-05-01	2017	fallow	0	0	0	?	0	12.34	0	1	1	1	1	?	?	?	?	0	0.001	9.527	9.372	7.07	4.342	1.764	0.63	-0.048	-0.03	0	0	0	0.001	0	0	0	0	0	0
								Medium_Lowland	PAN2423	40	2	2017-05-02	2017	fallow	0	0	0	?	0	1.85	0	1	1	1	1	?	?	?	?	0	0.001	-0.327	0.26	0.855	1.14	1.452	0.945	0.26	-0.02	0	0	0	0.001	0	0	0	0	0	0
								Medium_Lowland	PAN2423	40	2	2017-05-03	2017	fallow	0	0	0	?	0	0.81	0	1	1	1	1	?	?	?	?	0	0.001	-0.814	-1.36	0.557	1.14	1.296	1.085	0.59	0.001	0	0	0	0.001	0	0	0	0	0	0
								Medium_Lowland	PAN2423	40	2	2017-05-04	2017	fallow	0	0	0	?	0	0.09	0	1	1	1	1	?	?	?	?	0	0	-1.083	-0.65	-1.121	0.706	1.001	1.052	0.775	0.028	0	0	0	0	0	0	0	0	0	0
								Medium_Lowland	PAN2423	40	2	2017-05-05	2017	fallow	0	0	0	?	0	0.21	0	1	1	1	1	?	?	?	?	0	0	-0.939	-1.011	-0.578	-0.812	0.501	0.831	0.797	0.056	0	0	0	0	0	0	0	0	0	0
								Medium_Lowland	PAN2423	40	2	2017-05-06	2017	fallow	0	0	0	?	0	0.71	0	1	1	1	1	?	?	?	?	0	0	-0.963	-0.809	-0.81	-0.579	-0.279	0.499	0.678	0.08	0	0	0	0	0	0	0	0	0	0
								Medium_Lowland	PAN2423	40	2	2017-05-07	2017	fallow	0	0	0	?	0	0.47	0	1	1	1	1	?	?	?	?	0	0	-0.843	-0.83	-0.722	-0.596	-0.277	0.187	0.482	0.196	0	0	0	0	0	0	0	0	0	0
								Medium_Lowland	PAN2423	40	2	2017-05-08	2017	fallow	0	0	0	?	0	0.83	0	1	1	1	1	?	?	?	?	0	0.001	-0.773	-0.753	-0.685	-0.569	-0.295	0.002	0.29	0.138	0.025	0.007	0.002	0.001	0	0	0	0	0	0
								Medium_Lowland	PAN2423	40	2	2017-05-09	2017	fallow	0	0	0	?	0	1.93	0	1	1	1	1	?	?	?	?	0	0.003	-0.611	-0.641	-0.61	-0.52	-0.295	-0.141	0.174	0.149	0.062	0.024	0.009	0.003	0	0	0	0	0	0
								Medium_Lowland	PAN2423	40	2	2017-05-10	2017	fallow	0	0	0	?	0	4.66	0	1	1	1	1	?	?	?	?	0	0.008	1.59	1.032	0.367	0.178	-0.179	-0.132	0.048	0.119	0.079	0.04	0.018	0.008	0	0	0	0	0	0
								Medium_Lowland	PAN2423	40	2	2017-05-11	2017	fallow	0	0	0	?	0	4.72	0	1	1	1	1	?	?	?	?	0	0.014	2.25	2.25	0.855	0.559	0.01	-0.115	-0.175	0.083	0.08	0.052	0.028	0.014	0	0	0	0	0	0
								Medium_Lowland	PAN2423	40	2	2017-05-12	2017	fallow	0	0	0	?	0	6.26	0	1	1	1	1	?	?	?	?	0	0.021	3.79	3.79	3.17	1.14	0.369	0	0	0.006	0.058	0.054	0.036	0.021	0	0	0	0	0	0
								Medium_Lowland	PAN2423	40	2	2017-05-13	2017	fallow	0	0	0	?	0	3.8	0	1	1	1	1	?	?	?	?	0	0.027	1.33	1.33	1.33	1.14	0.695	0.278	0.111	0.037	0.052	0.053	0.041	0.027	0	0	0	0	0	0
								Medium_Lowland	PAN2423	40	2	2017-05-14	2017	fallow	0	0	0	?	0	5.26	0	1	1	1	1	?	?	?	?	0	0.033	2.79	2.79	2.79	2.47	1.582	0.8	0.387	0.142	0.079	0.061	0.047	0.033	0	0	0	0	0	0
								Medium_Lowland	PAN2423	40	2	2017-05-15	2017	fallow	0	0	0	?	0	3.49	0	1	1	1	1	?	?	?	?	0	0.041	1.02	1.02	1.02	1.14	1.361	1.024	0.642	0.292	0.143	0.085	0.059	0.041	0	0	0	0	0	0
								Medium_Lowland	PAN2423	40	2	2017-05-16	2017	fallow	0	0	0	?	0	3.99	0	1	1	1	1	?	?	?	?	0	0.053	1.52	1.52	1.52	1.4	1.381	1.167	0.852	0.46	0.238	0.131	0.08	0.053	0	0	0	0	0	0
								Medium_Lowland	PAN2423	40	2	2017-05-17	2017	fallow	0	0	0	?	0	6.98	0	1	1	1	1	?	?	?	?	0	0.072	4.51	4.51	4.51	4.51	2.5	1.7	1.191	0.679	0.37	0.203	0.117	0.072	0	0	0	0	0	0
								Medium_Lowland	PAN2423	40	2	2017-05-18	2017	fallow	0	0	0	?	0	6.53	0	1	1	1	1	?	?	?	?	0	0.102	4.06	4.06	4.06	4.06	2.5	2.02	1.523	0.932	0.539	0.304	0.173	0.102	0	0	0	0	0	0
								Medium_Lowland	PAN2423	40	2	2017-05-19	2017	fallow	0	0	0	?	0	6.69	0	1	1	1	1	?	?	?	?	0	0.148	4.22	4.22	4.22	4.22	4.171	2.88	2.066	1.272	0.759	0.44	0.253	0.148	0	0	0	0	0	0.1
								Medium_Lowland	PAN2423	40	2	2017-05-20	2017	fallow	0	0	0	?	0	3.91	0	1	1	1	1	?	?	?	?	0	0.211	1.44	1.44	1.44	1.44	2.5	2.728	2.331	1.59	1.008	0.611	0.361	0.211	0	0	0	0	0	0
								Medium_Lowland	PAN2423	40	2	2017-05-21	2017	fallow	0	0	0	?	0	1.62	0	1	1	1	1	?	?	?	?	0	0.296	-0.518	0.145	0.855	1.14	2.5	2.637	2.453	1.849	1.26	0.806	0.494	0.296	0	0	0	0	0	0
								Medium_Lowland	PAN2423	40	2	2017-05-22	2017	fallow	0	0	0	?	0	0.39	0	1	1	1	1	?	?	?	?	0	0.402	-0.875	-1.42	0.5	1.14	1.86	2.326	2.402	2.015	1.487	1.01	0.649	0.402	0	0	0	0	0	0
								Medium_Lowland	PAN2423	40	2	2017-05-23	2017	fallow	0	0	0	?	0	2.48	0	1	1	1	1	?	?	?	?	0	0.526	-0.423	-0.254	-0.949	0.677	1.269	1.903	2.203	2.071	1.662	1.206	0.816	0.526	0	0	0	0	0	0
								Medium_Lowland	PAN2423	40	2	2017-05-24	2017	fallow	0	0	0	?	0	0.43	0	1	1	1	1	?	?	?	?	0	0.663	-1	-0.98	-0.56	-0.735	0.634	1.396	1.88	2.014	1.768	1.374	0.983	0.663	0	0	0	0	0	0
								Medium_Lowland	PAN2423	40	2	2017-05-25	2017	fallow	0	0	0	?	0	0.15	0	1	1	1	1	?	?	?	?	0	0.806	-0.994	-0.82	-0.784	-0.56	-0.311	0.837	1.463	1.849	1.792	1.499	1.138	0.806	0	0	0	0	0	0
								Medium_Lowland	PAN2423	40	2	2017-05-26	2017	fallow	0	0	0	?	0	7.11	0	1	1	1	1	?	?	?	?	0	0.944	3.989	3.507	1.116	0.398	0.024	0.388	1.033	1.604	1.735	1.57	1.268	0.944	0	0	0	0	0	0
								Medium_Lowland	PAN2423	40	2	2017-05-27	2017	fallow	0	0	0	?	0	10.11	0	1	1	1	1	?	?	?	?	0	1.071	7.64	7.64	7.64	5.758	2.5	1.233	1.113	1.457	1.652	1.595	1.366	1.071	0	0	0	0	0	0
								Medium_Lowland	PAN2423	40	2	2017-05-28	2017	fallow	0	0	0	?	0	1.77	0	1	1	1	1	?	?	?	?	0	1.18	-0.393	0.22	0.855	1.14	2.211	1.624	1.317	1.415	1.581	1.591	1.433	1.18	0	0	0	0	0	0
								Medium_Lowland	PAN2423	40	2	2017-05-29	2017	fallow	0	0	0	?	0	4.33	0	1	1	1	1	?	?	?	?	0	1.268	1.553	0.94	0.855	1.14	1.675	1.645	1.448	1.425	1.534	1.574	1.475	1.268	0	0	0	0	0	0
								Medium_Lowland	PAN2423	40	2	2017-05-30	2017	fallow	0	0	0	?	0	3.48	0	1	1	1	1	?	?	?	?	0	1.337	1.01	1.01	0.855	1.14	1.408	1.55	1.489	1.444	1.507	1.554	1.499	1.337	0	0	0	0	0	0
								Medium_Lowland	PAN2423	40	2	2017-05-31	2017	fallow	0	0	0	?	0	5.58	0	1	1	1	1	?	?	?	?	0	1.35	3.11	3.11	2.715	1.86	1.634	1.583	1.527	1.469	1.495	1.536	1.51	1.35	0	0	0	0	0	0
								Medium_Lowland	PAN2423	40	2	2017-06-01	2017	fallow	0	0	0	?	0	10.91	0	1	1	1	1	?	?	?	?	0	1.35	8.44	8.44	8.44	8.44	5.074	2.98	2.108	1.661	1.545	1.539	1.519	1.35	0	0	0	0	0	0
								Medium_Lowland	PAN2423	40	2	2017-06-02	2017	fallow	0	0	0	?	0	8.11	0	1	1	1	1	?	?	?	?	0	1.35	5.64	5.64	5.64	5.64	5.64	4.044	2.882	2.027	1.69	1.584	1.538	1.35	0	0	0	0	0	0
								Medium_Lowland	PAN2423	40	2	2017-06-03	2017	fallow	0	0	0	?	0	5.12	0	1	1	1	1	?	?	?	?	0	1.35	2.65	2.65	2.65	2.65	2.65	3.486	3.124	2.356	1.89	1.676	1.579	1.35	0	0	0	0	0	0
								Medium_Lowland	PAN2423	40	2	2017-06-04	2017	fallow	0	0	0	?	0	1.99	0	1	1	1	1	?	?	?	?	0	1.35	-0.21	0.33	0.855	1.14	2.5	3.092	3.111	2.583	2.097	1.802	1.646	1.35	0	0	0	0	0	0
								Medium_Lowland	PAN2423	40	2	2017-06-05	2017	fallow	0	0	0	?	0	1.54	0	1	1	1	1	?	?	?	?	0	1.399	-0.62	-1.23	0.593	1.14	2.39	2.811	2.991	2.705	2.28	1.945	1.736	1.399	0	0	0	0	0	0
								Medium_Lowland	PAN2423	40	2	2017-06-06	2017	fallow	0	0	0	?	0	3.37	0	1	1	1	1	?	?	?	?	0	1.841	0.38	0.228	-0.409	0.724	1.557	2.309	2.718	2.709	2.409	2.084	1.841	1.841	0	0	0	0	0	0
								Medium_Lowland	PAN2423	40	2	2017-06-07	2017	fallow	0	0	0	?	0	1.05	0	1	1	1	1	?	?	?	?	0	1.948	-0.98	0.001	0.001	0.158	0.857	1.729	2.322	2.593	2.464	2.198	1.948	1.948	0	0	0	0	0	0
								Medium_Lowland	PAN2423	40	2	2017-06-08	2017	fallow	0	0	0	?	0	1.26	0	1	1	1	1	?	?	?	?	0	2.045	-0.653	-1.144	0	0.079	0.468	1.224	1.883	2.38	2.439	2.27	2.045	2.045	0	0	0	0	0	0
								Medium_Lowland	PAN2423	40	2	2017-06-09	2017	fallow	0	0	0	?	0	3.1	0	1	1	1	1	?	?	?	?	0	2.118	0.633	0.38	-0.442	0.039	0.254	0.836	1.464	2.105	2.339	2.291	2.118	2.118	0	0	0	0	0	0
								Medium_Lowland	PAN2423	40	2	2017-06-10	2017	fallow	0	0	0	?	0	2.49	0	1	1	1	1	?	?	?	?	0	2.16	0.196	0.564	0.323	-0.053	0.127	0.552	1.1	1.804	2.178	2.257	2.16	2.16	0	0	0	0	0	0
								Medium_Lowland	PAN2423	40	2	2017-06-11	2017	fallow	0	0	0	?	0	5.53	0	1	1	1	1	?	?	?	?	0	2.164	2.868	2.484	0.855	0.414	0.244	0.429	0.831	1.512	1.978	2.173	2.164	2.164	0	0	0	0	0	0
								Medium_Lowland	PAN2423	40	2	2017-06-12	2017	fallow	0	0	0	?	0	10.83	0	1	1	1	1	?	?	?	?	0	2.133	8.36	8.36	8.199	6.333	2.5	1.257	1.002	1.359	1.793	2.059	2.133	2.133	0	0	0	0	0	0
								Medium_Lowland	PAN2423	40	2	2017-06-13	2017	fallow	0	0	0	?	0	1.25	0	1	1	1	1	?	?	?	?	0	2.074	-0.813	-1.127	0.855	1.14	2.5	1.754	1.303	1.342	1.657	1.939	2.074	2.074	0	0	0	0	0	0
								Medium_Lowland	PAN2423	40	2	2017-06-14	2017	fallow	0	0	0	?	0	0.64	0	1	1	1	1	?	?	?	?	0	2.001	-1.201	-0.721	-0.983	0.997	1.857	1.796	1.5	1.389	1.577	1.83	2.001	2.001	0	0	0	0	0	0
								Medium_Lowland	PAN2423	40	2	2017-06-15	2017	fallow	0	0	0	?	0	3.05	0	1	1	1	1	?	?	?	?	0	1.923	0.331	0.555	0.272	0.144	1	1.478	1.491	1.42	1.53	1.74	1.923	1.923	0	0	0	0	0	0
								Medium_Lowland	PAN2423	40	2	2017-06-16	2017	fallow	0	0	0	?	0	8.46	0	1	1	1	1	?	?	?	?	0	1.847	5.795	5.405	3.967	1.831	1.416	1.453	1.476	1.437	1.502	1.669	1.847	1.847	0	0	0	0	0	0
								Medium_Lowland	PAN2423	40	2	2017-06-17	2017	fallow	0	0	0	?	0	2.74	0	1	1	1	1	?	?	?	?	0	1.776	0.37	0.57	0.855	1.14	1.278	1.383	1.439	1.437	1.482	1.613	1.776	1.776	0	0	0	0	0	0
								Medium_Lowland	PAN2423	40	2	2017-06-18	2017	fallow	0	0	0	?	0	2.45	0	1	1	1	1	?	?	?	?	0	1.714	0.123	0.41	0.855	1.14	1.209	1.313	1.388	1.423	1.465	1.568	1.714	1.714	0	0	0	0	0	0
								Medium_Lowland	PAN2423	40	2	2017-06-19	2017	fallow	0	0	0	?	0	44.96	0	1	1	1	1	?	?	?	?	0	1.694	27.608	27.121	26.391	25.821	22.03	12	5.633	2.686	1.831	1.647	1.694	1.694	0	0	0	0	0	0.1
								Medium_Lowland	PAN2423	40	2	2017-06-20	2017	fallow	0	0	0	?	0	34.33	0	1	1	1	1	?	?	?	?	0	1.754	12	12	12	12	12	12	6.96	3.968	2.472	1.895	1.754	1.754	0	0	0	0	0	0
								Medium_Lowland	PAN2423	40	2	2017-06-21	2017	fallow	0	0	0	?	0	8.34	0	1	1	1	1	?	?	?	?	0	1.891	5.87	5.87	5.87	5.87	5.87	5.87	6.96	4.05	2.945	2.21	1.891	1.891	0	0	0	0	0	0
								Medium_Lowland	PAN2423	40	2	2017-06-22	2017	fallow	0	0	0	?	0	3.82	0	1	1	1	1	?	?	?	?	0	2.123	1.35	1.35	1.35	1.35	2.5	4.8	6.88	5.549	3.726	2.665	2.123	2.123	0	0	0	0	0	0
								Medium_Lowland	PAN2423	40	2	2017-06-23	2017	fallow	0	0	0	?	0	19.09	0	1	1	1	1	?	?	?	?	0	2.41	15.45	15.45	15.45	15.45	14.3	12	6.96	6.96	4.05	3.08	2.41	2.41	0	0	0	0	0	0
								Medium_Lowland	PAN2423	40	2	2017-06-24	2017	fallow	0	0	0	?	0	15.62	0	1	1	1	1	?	?	?	?	0	2.883	10.04	10.04	10.04	10.04	10.04	10.04	8	8	6.105	3.988	2.883	2.883	0	0	0	0	0	0
								Medium_Lowland	PAN2423	40	2	2017-06-25	2017	fallow	0	0	0	?	0	4.03	0	1	1	1	1	?	?	?	?	0	3.233	1.56	1.56	1.56	1.56	2.5	4.8	6.96	6.96	6.96	4.05	3.233	3.233	0	0	0	0	0	0
								Medium_Lowland	PAN2423	40	2	2017-06-26	2017	fallow	0	0	0	?	0	8.25	0	1	1	1	1	?	?	?	?	0	3.966	5.78	5.78	5.78	5.78	4.84	4.8	6.96	6.96	6.96	5.675	3.966	3.966	0	0	0	0	0	0
								Medium_Lowland	PAN2423	40	2	2017-06-27	2017	fallow	0	0	0	?	0	10.79	0	1	1	1	1	?	?	?	?	0	4.05	8.32	8.32	8.32	8.32	8.32	6.06	6.96	6.96	6.96	6.96	4.05	4.05	0	0	0	0	0	0
								Medium_Lowland	PAN2423	40	2	2017-06-28	2017	fallow	0	0	0	?	0	4.89	0	1	1	1	1	?	?	?	?	0	5.455	2.42	2.42	2.42	2.42	2.5	4.8	6.792	6.792	6.792	6.792	5.455	5.455	0	0	0	0	0	0
								Medium_Lowland	PAN2423	40	2	2017-06-29	2017	fallow	0	0	0	?	0	3.49	0	1	1	1	1	?	?	?	?	0	5.995	1.02	1.02	1.02	1.14	2.5	4.8	5.995	5.995	5.995	5.995	5.995	5.995	0	0	0	0	0	0
								Medium_Lowland	PAN2423	40	2	2017-06-30	2017	fallow	0	0	0	?	0	7.65	0	1	1	1	1	?	?	?	?	0	5.36	5.18	5.18	5.18	5.06	3.62	4.408	5.36	5.36	5.36	5.36	5.36	5.36	0	0	0	0	0	0
								Medium_Lowland	PAN2423	40	2	2017-07-01	2017	fallow	0	0	0	?	0	41.21	0	1	1	1	1	?	?	?	?	0	6.96	17.388	17.388	17.388	17.388	17.388	12	6.96	6.96	6.96	6.96	6.96	6.96	17.497	0	0	0	0	0
								Medium_Lowland	PAN2423	40	2	2017-07-02	2017	fallow	0	0	0	?	0	12.03	0	1	1	1	1	?	?	?	?	0	7.68	12.299	12	12	12	12	12	7.68	7.68	7.68	7.68	7.68	7.68	13.035	0	0	0	0	0
								Medium_Lowland	PAN2423	40	2	2017-07-03	2017	rice	0	4.3	0	?	0	25.88	0.015	1	1	1	1	?	?	?	?	2.6	8	7.701	8	8	8	8	8	8	8	8	8	8	8	25.713	0	0	0	0	0
								Medium_Lowland	PAN2423	40	2	2017-07-04	2017	rice	0	9.9	0	?	0	11.52	0.031	1	1	1	1	?	?	?	?	5.9	8	8	8	8	8	8	8	8	8	8	8	8	8	23.832	0	0	0	0	0
								Medium_Lowland	PAN2423	40	2	2017-07-05	2017	rice	0	13.9	0	?	0	8.3	0.045	1	1	1	1	?	?	?	?	8.3	8	8.997	8	8	8	8	8	8	8	8	8	8	8	20.444	0	0	0	0	0
								Medium_Lowland	PAN2423	40	2	2017-07-06	2017	rice	0	17.2	0	?	0	12.33	0.06	1	1	1	1	?	?	?	?	10.3	8	8.52	8	8	8	8	8	8	8	8	8	8	8	22.859	0	0	0	0	0
								Medium_Lowland	PAN2423	40	2	2017-07-07	2017	rice	0	28.3	0	?	0	14.44	0.075	1	1	1	1	?	?	?	?	17	8	6.483	8	8	8	8	8	8	8	8	8	8	8	25.937	0	0	0	0	0
								Medium_Lowland	PAN2423	40	2	2017-07-08	2017	rice	0	43.9	0	?	0	13.97	0.09	1	1	1	1	?	?	?	?	26.3	8	8	8	8	8	8	8	8	8	8	8	8	8	26.361	0	0	0	0	0
								Medium_Lowland	PAN2423	40	2	2017-07-09	2017	rice	0	64.9	0	?	0	6.38	0.105	1	1	1	1	?	?	?	?	38.9	8	8	8	8	8	8	8	8	8	8	8	8	8	18.812	0	0	0	0	0
								Medium_Lowland	PAN2423	40	2	2017-07-10	2017	rice	0	87.2	0	?	0	14.34	0.12	1	1	1	1	?	?	?	?	52.3	8	8.184	8	8	8	8	8	8	8	8	8	8	8	20.488	0	0	0	0	0
								Medium_Lowland	PAN2423	40	2	2017-07-11	2017	rice	0	112	0	?	0	33.64	0.136	1	1	1	1	?	?	?	?	67.2	8	8.446	8	8	8	8	8	8	8	8	8	8	8	42.35	0	0	0	0	0
								Medium_Lowland	PAN2423	40	2	2017-07-12	2017	rice	0	136.5	0	?	0	37.98	0.151	1	1	1	1	?	?	?	?	81.9	8	8.604	8	8	8	8	8	8	8	8	8	8	8	69.765	0	0	0	0	0
								Medium_Lowland	PAN2423	40	2	2017-07-13	2017	rice	0	183.2	0	?	0	12.62	0.166	1	1	1	1	?	?	?	?	109.9	8	7.234	8	8	8	8	8	8	8	8	8	8	8	71.637	0	0	0	0	0
								Medium_Lowland	PAN2423	40	2	2017-07-14	2017	rice	0	242.7	0	?	0	6.84	0.181	1	1	1	1	?	?	?	?	145.6	8	8.022	8	8	8	8	8	8	8	8	8	8	8	66.974	0	0	0	0	0
								Medium_Lowland	PAN2423	40	2	2017-07-15	2017	rice	0	294.3	0	?	0	2.87	0.196	1	1	1	1	?	?	?	?	176.6	8	7.85	8	8	8	8	8	8	8	8	8	8	8	58.149	0	0	0	0	0
								Medium_Lowland	PAN2423	40	2	2017-07-16	2017	rice	0	363.5	0	?	0	5.25	0.211	1	1	1	1	?	?	?	?	218.1	8	7.66	8	8	8	8	8	8	8	8	8	8	8	50.849	0	0	0	0	0
								Medium_Lowland	PAN2423	40	2	2017-07-17	2017	rice	0	421.7	0	?	0	8.66	0.226	1	1	1	1	?	?	?	?	253	8	8.29	8	8	8	8	8	8	8	8	8	8	8	47.004	0	0	0	0	0
								Medium_Lowland	PAN2423	40	2	2017-07-18	2017	rice	0	487.8	0	?	0	8.75	0.241	1	1	1	1	?	?	?	?	292.7	8	7.851	8	8	8	8	8	8	8	8	8	8	8	43.462	0	0	0	0	0
								Medium_Lowland	PAN2423	40	2	2017-07-19	2017	rice	0	531.7	0	?	0	26.22	0.256	1	1	1	1	?	?	?	?	319	8	9.198	8	8	8	8	8	8	8	8	8	8	8	58.548	0	0	0	0	0
								Medium_Lowland	PAN2423	40	2	2017-07-20	2017	rice	0	541.1	0	?	0	69.5	0.272	1	1	1	1	?	?	?	?	324.7	8	8.306	8	8	8	8	8	8	8	8	8	8	8	118.959	0	0	0	0	0
								Medium_Lowland	PAN2423	40	2	2017-07-21	2017	rice	0	560.1	0	?	0	136.76	0.287	1	1	1	1	?	?	?	?	336.1	8	8	8	8	8	8	8	8	8	8	8	8	8	247.149	0	0	0	0	0
								Medium_Lowland	PAN2423	40	2	2017-07-22	2017	rice	0	593.9	0	?	0	45.53	0.302	1	1	1	1	?	?	?	?	356.3	8	7.996	8	8	8	8	8	8	8	8	8	8	8	283.748	0	0	0	0	0
								Medium_Lowland	PAN2423	40	2	2017-07-23	2017	rice	0	39.1	0	?	0	55.68	0.317	1	1	1	1	?	?	?	?	23.5	8	8.004	8	8	8	8	8	8	8	8	8	8	8	299.797	0	0	0	0	0
								Medium_Lowland	PAN2423	40	2	2017-07-24	2017	rice	0	40.7	0	?	0	93.68	0.317	1	1	1	0.982	?	?	?	?	24.4	8	8	8	8	8	8	8	8	8	8	8	8	8	299.579	0	0	0	0	0
								Medium_Lowland	PAN2423	40	2	2017-07-25	2017	rice	0	44.5	0	?	0	20.9	0.317	1	1	1	0.96	?	?	?	?	26.7	8	7.729	8.02	8	8	8	8	8	8	8	8	8	8	299.125	0	0	0	0	0
								Medium_Lowland	PAN2423	40	2	2017-07-26	2017	rice	0	49.6	0	?	0	17.21	0.317	1	1	1	0.965	?	?	?	?	29.8	8	7.728	8.049	8.012	8	8	8	8	8	8	8	8	8	298.78	0	0	0	0	0
								Medium_Lowland	PAN2423	40	2	2017-07-27	2017	rice	0	56.3	0	?	0	7.23	0.317	1	1	1	0.894	?	?	?	?	33.8	8	7.499	8.074	8.03	8	8	8	8	8	8	8	8	8	294.786	0	0	0	0	0
								Medium_Lowland	PAN2423	40	2	2017-07-28	2017	rice	0	63.9	0	?	0	8.24	0.317	1	1	1	0.875	?	?	?	?	38.3	8	7.843	8.122	8.061	8	8	8	8	8	8	8	8	8	290.592	0	0	0	0	0
								Medium_Lowland	PAN2423	40	2	2017-07-29	2017	rice	0	71.3	0	?	0	2.2	0.317	1	1	1	0.892	?	?	?	?	42.8	8	8.268	8.161	8.092	8	8	8	8	8	8	8	8	8	279.922	0	0	0	0	0
								Medium_Lowland	PAN2423	40	2	2017-07-30	2017	rice	0	79.2	0	?	0	5.03	0.317	1	1	1	0.926	?	?	?	?	47.5	8	8.53	8.161	8.101	8.02	8	8	8	8	8	8	8	8	272.676	0	0	0	0	0
								Medium_Lowland	PAN2423	40	2	2017-07-31	2017	rice	0	89.1	0	?	0	7.3	0.317	1	1	1	0.928	?	?	?	?	53.5	8	8.14	8.159	8.106	8.035	8	8	8	8	8	8	8	8	268.122	0	0	0	0	0
								Medium_Lowland	PAN2423	40	2	2017-08-01	2017	rice	0	102.8	0	?	0	3.17	0.332	1	1	1	0.917	?	?	?	?	61.7	8	8.011	8.21	8.147	8.063	8	8	8	8	8	8	8	8	258.935	0	0	0	0	0
								Medium_Lowland	PAN2423	40	2	2017-08-02	2017	rice	0	109.9	0	?	0	9.62	0.348	1	1	1	0.981	?	?	?	?	66	8	9.676	8.313	8.228	8.114	8	8	8	8	8	8	8	8	257.189	0	0	0	0	0
								Medium_Lowland	PAN2423	40	2	2017-08-03	2017	rice	0	127.3	0	?	0	15.58	0.363	1	1	1	0.962	?	?	?	?	76.4	8	7.39	8.131	8.098	8.055	8	8	8	8	8	8	8	8	262.354	0	0	0	0	0
								Medium_Lowland	PAN2423	40	2	2017-08-04	2017	rice	0	153.4	0	?	0	17.6	0.378	1	1	1	0.943	?	?	?	?	92	8	8.044	8.335	8.258	8.155	8	8	8	8	8	8	8	8	268.11	0	0	0	0	0
								Medium_Lowland	PAN2423	40	2	2017-08-05	2017	rice	0	180.7	0	?	0	13.64	0.394	1	1	1	0.969	?	?	?	?	108.4	8	9	8.536	8.421	8.268	8	8	8	8	8	8	8	8	269.713	0	0	0	0	0
								Medium_Lowland	PAN2423	40	2	2017-08-06	2017	rice	0	218.3	0	?	0	5.28	0.409	1	1	1	0.958	?	?	?	?	131	8	8.363	8.507	8.406	8.27	8	8	8	8	8	8	8	8	263.246	0	0	0	0	0
								Medium_Lowland	PAN2423	40	2	2017-08-07	2017	rice	0	257.1	0	?	0	7.78	0.426	1	1	1	0.983	?	?	?	?	154.2	8	9.214	8.724	8.588	8.407	8	8	8	8	8	8	8	8	259.216	0	0	0	0	0
								Medium_Lowland	PAN2423	40	2	2017-08-08	2017	rice	0	325.2	0	?	0	8.8	0.442	1	1	1	0.946	?	?	?	?	195.1	8	8.016	8.684	8.563	8.402	8	8	8	8	8	8	8	8	255.752	0	0	0	0	0
								Medium_Lowland	PAN2423	40	2	2017-08-09	2017	rice	0	411.6	0	?	0	6.4	0.459	1	1	1	0.946	?	?	?	?	247	8	9.564	9.453	9.211	8.888	8.081	8	8	8	8	8	8	8	248.014	0	0	0	0	0
								Medium_Lowland	PAN2423	40	2	2017-08-10	2017	rice	0	500.2	0	?	0	13.55	0.477	1	1	0.799	0.965	?	?	?	?	300.1	8	10.422	9.839	9.549	9.162	8.194	8	8	8	8	8	8	8	247.491	0	0	0	0	0
								Medium_Lowland	PAN2423	40	2	2017-08-11	2017	rice	0	582.9	0	?	0	15.24	0.494	1	1	0	0.988	?	?	?	?	349.8	8	10.309	9.677	9.426	9.09	8.252	8	8	8	8	8	8	8	249.897	0	0	0	0	0
								Medium_Lowland	PAN2423	40	2	2017-08-12	2017	rice	0	620.2	0	?	0	24.53	0.511	1	1	0	0.99	?	?	?	?	372.1	8	10.278	9.486	9.273	8.99	8.283	8	8	8	8	8	8	8	262.974	0	0	0	0	0
								Medium_Lowland	PAN2423	40	2	2017-08-13	2017	rice	0	692.5	0	?	0	11.34	0.528	1	1	0	0.989	?	?	?	?	414.5	8	8.278	8.652	8.563	8.444	8.148	8	8	8	8	8	8	8	264.037	0	0	0	0	0
								Medium_Lowland	PAN2423	40	2	2017-08-14	2017	rice	0	776.4	0	?	0	16.62	0.544	1	1	0	0.99	?	?	?	?	462.1	8	9.259	9.256	9.092	8.873	8.328	8	8	8	8	8	8	8	269.125	0	0	0	0	0
								Medium_Lowland	PAN2423	40	2	2017-08-15	2017	rice	0	903.7	0	?	0	12.43	0.561	1	1	0	0.966	?	?	?	?	531.7	8	8.902	9.494	9.307	9.058	8.436	8	8	8	8	8	8	8	268.881	0	0	0	0	0
								Medium_Lowland	PAN2423	40	2	2017-08-16	2017	rice	0	1014.5	0	?	0	7.56	0.578	1	1	0	0.988	?	?	?	?	590.1	8	11.509	10.747	10.417	9.978	8.879	8	8	8	8	8	8	8	262.198	0	0	0	0	0
								Medium_Lowland	PAN2423	40	2	2017-08-17	2017	rice	0	1167.3	0	?	0	9.52	0.595	1	1	0	0.968	?	?	?	?	667.4	8	9.834	10.225	9.969	9.626	8.77	8	8	8	8	8	8	8	258.038	0	0	0	0	0
								Medium_Lowland	PAN2423	40	2	2017-08-18	2017	rice	0	1313.7	0	?	0	4.88	0.612	1	1	0	0.985	?	?	?	?	738.6	8	12.524	11.794	11.372	10.81	9.405	8	8	8	8	8	8	8	247.391	0	0	0	0	0
								Medium_Lowland	PAN2423	40	2	2017-08-19	2017	rice	0	1473.2	0	?	0	9.93	0.628	1	1	0	0.986	?	?	?	?	812.9	8	11.488	11.245	10.897	10.434	9.275	8	8	8	8	8	8	8	242.949	0	0	0	0	0
								Medium_Lowland	PAN2423	40	2	2017-08-20	2017	rice	0	1655.3	0	?	0	12.68	0.645	1	1	0	0.98	?	?	?	?	894.1	8	11.716	11.637	11.26	10.759	9.505	8	8	8	8	8	8	8	240.676	0	0	0	0	0
								Medium_Lowland	PAN2423	40	2	2017-08-21	2017	rice	0	1841.2	0	?	0	5.99	0.662	1	1	0	0.988	?	?	?	?	973.2	8	12.923	12.425	11.983	11.393	9.918	8	8	8	8	8	8	8	230.891	0	0	0	0	0
								Medium_Lowland	PAN2423	40	2	2017-08-22	2017	rice	0	1947.7	0	?	0	5.03	0.682	1	1	0	0.992	?	?	?	?	1016.5	8	13.199	12.159	11.757	11.22	9.878	8	8	8	8	8	8	8	221.426	0	0	0	0	0
								Medium_Lowland	PAN2423	40	2	2017-08-23	2017	rice	0	2088.6	0	?	0	15.09	0.701	1	1	0	0.992	?	?	?	?	1070.2	8	9.853	9.909	9.73	9.491	8.895	8	8	8	8	8	8	8	225.093	0	0	0	0	0
								Medium_Lowland	PAN2423	40	2	2017-08-24	2017	rice	0	2311.1	0	?	0	7.3	0.721	1	1	0	0.986	?	?	?	?	1150	8	10.05	10.559	10.327	10.016	9.241	8	8	8	8	8	8	8	219.427	0	0	0	0	0
								Medium_Lowland	PAN2423	40	2	2017-08-25	2017	rice	0	2527.2	0	?	0	4.43	0.741	1	1	0	0.993	?	?	?	?	1222.3	8	13.507	12.982	12.542	11.956	10.491	8	8	8	8	8	8	8	207.829	0	0	0	0	0
								Medium_Lowland	PAN2423	40	2	2017-08-26	2017	rice	0	2742.8	0	?	0	4.91	0.761	1	1	0	0.993	?	?	?	?	1289.3	8	12.792	12.387	12.011	11.51	10.256	8	8	8	8	8	8	8	197.755	0	0	0	0	0
								Medium_Lowland	PAN2423	40	2	2017-08-27	2017	rice	0	2937.9	0	?	0	12.2	0.781	1	1	0	0.993	?	?	?	?	1345.1	8	12.42	11.976	11.645	11.203	10.098	8	8	8	8	8	8	8	195.804	0	0	0	0	0
								Medium_Lowland	PAN2423	40	2	2017-08-28	2017	rice	0	3130.5	0	?	0	18.94	0.801	1	1	0	0.993	?	?	?	?	1395.7	8	11.431	11.224	10.963	10.614	9.743	8	8	8	8	8	8	8	201.67	0	0	0	0	0
								Medium_Lowland	PAN2423	40	2	2017-08-29	2017	rice	0	3314.7	0	?	0	13.35	0.821	1	1	0	0.993	?	?	?	?	1439.6	8	11.391	11.164	10.907	10.565	9.71	8	8	8	8	8	8	8	202.101	0	0	0	0	0
								Medium_Lowland	PAN2423	40	2	2017-08-30	2017	rice	0	3551	0	?	0	5.19	0.841	1	1	0	0.993	?	?	?	?	1490.3	8	10.809	10.984	10.742	10.419	9.613	8	8	8	8	8	8	8	194.287	0	0	0	0	0
								Medium_Lowland	PAN2423	40	2	2017-08-31	2017	rice	0	3734.3	0	?	0	4.63	0.861	1	1	0	0.993	?	?	?	?	1525.2	8	13.044	12.425	12.066	11.588	10.392	8	8	8	8	8	8	8	184.399	0	0	0	0	0
								Medium_Lowland	PAN2423	40	2	2017-09-01	2017	rice	0	3904	0	?	0	18.59	0.881	1	1	0	0.993	?	?	?	?	1553.4	8	11.101	10.878	10.645	10.334	9.556	8	8	8	8	8	8	8	190.589	0	0	0	0	0
								Medium_Lowland	PAN2423	40	2	2017-09-02	2017	rice	0	4144.5	0	?	0	50.29	0.901	1	1	0	0.993	?	?	?	?	1587.6	8	10.416	10.607	10.396	10.114	9.409	8	8	8	8	8	8	8	228.506	0	0	0	0	0
								Medium_Lowland	PAN2423	40	2	2017-09-03	2017	rice	0	4397.1	0	?	0	4.99	0.92	1	1	0	0.993	?	?	?	?	1617.7	8	11.996	12.029	11.702	11.267	10.178	8	8	8	8	8	8	8	219.004	0	0	0	0	0
								Medium_Lowland	PAN2423	40	2	2017-09-04	2017	rice	0	4653.4	0	?	0	1.03	0.94	1	1	0	0.992	?	?	?	?	1642.2	8	13.327	13.118	12.703	12.15	10.766	8	8	8	8	8	8	8	204.046	0	0	0	0	0
								Medium_Lowland	PAN2423	40	2	2017-09-05	2017	rice	0	4902.8	0	?	0	1.56	0.96	1	1	0	0.993	?	?	?	?	1660.2	8	13.852	13.41	12.971	12.386	10.924	8	8	8	8	8	8	8	189.385	0	0	0	0	0
								Medium_Lowland	PAN2423	40	2	2017-09-06	2017	rice	0	5155.4	127.3	?	0	2.87	0.98	1	1	0	0.992	?	?	?	?	1672.4	8	12.853	12.764	12.377	11.862	10.575	8	8	8	8	8	8	8	176.715	0	0	0	0	0
								Medium_Lowland	PAN2423	40	2	2017-09-07	2017	rice	0	5401.9	263.4	?	0	1.53	1	1	1	0	0.993	?	?	?	?	1678.3	8	13.84	13.475	13.031	12.439	10.959	8	8	8	8	8	8	8	161.836	0	0	0	0	0
								Medium_Lowland	PAN2423	40	2	2017-09-08	2017	rice	0	5614.2	425.7	?	0	2.07	1.03	1	1	0	0.993	?	?	?	?	1678.3	8	13.632	13.163	12.745	12.186	10.791	8	8	8	8	8	8	8	148.094	0	0	0	0	0
								Medium_Lowland	PAN2423	40	2	2017-09-09	2017	rice	0	5811.3	592	?	0	7.01	1.06	1	1	0	0.993	?	?	?	?	1678.3	8	12.698	12.336	11.984	11.515	10.344	8	8	8	8	8	8	8	140.503	0	0	0	0	0
								Medium_Lowland	PAN2423	40	2	2017-09-10	2017	rice	0	6018.1	777.5	?	0	3.62	1.09	1	1	0	0.993	?	?	?	?	1678.3	8	11.722	11.773	11.467	11.059	10.039	8	8	8	8	8	8	8	130.004	0	0	0	0	0
								Medium_Lowland	PAN2423	40	2	2017-09-11	2017	rice	0	6210.3	964.3	?	0	13.2	1.12	1	1	0	0.993	?	?	?	?	1678.3	8	13.219	12.824	12.432	11.911	10.607	8	8	8	8	8	8	8	127.829	0	0	0	0	0
								Medium_Lowland	PAN2423	40	2	2017-09-12	2017	rice	0	6395	1156.1	?	0	8.64	1.151	1	1	0	0.993	?	?	?	?	1678.3	8	12.43	12.232	11.889	11.432	10.288	8	8	8	8	8	8	8	121.837	0	0	0	0	0
								Medium_Lowland	PAN2423	40	2	2017-09-13	2017	rice	0	6575.3	1354.5	?	0	8.33	1.181	1	1	0	0.993	?	?	?	?	1678.3	8	12.549	12.336	11.984	11.516	10.344	8	8	8	8	8	8	8	115.37	0	0	0	0	0
								Medium_Lowland	PAN2423	40	2	2017-09-14	2017	rice	0	6750.6	1557.9	?	0	3.12	1.21	1	1	0	0.993	?	?	?	?	1678.3	8	12.535	12.396	12.04	11.564	10.376	8	8	8	8	8	8	8	103.508	0	0	0	0	0
								Medium_Lowland	PAN2423	40	2	2017-09-15	2017	rice	0	6915.9	1755.9	?	0	2.87	1.241	0.954	0.996	0	0.993	?	?	?	?	1678.3	8	13	12.773	12.386	11.87	10.58	8	8	8	8	8	8	8	90.859	0	0	0	0	0
								Medium_Lowland	PAN2423	40	2	2017-09-16	2017	rice	0	7073.2	1942.8	?	0	0.66	1.27	0.954	0.996	0	0.991	?	?	?	?	1678.3	8	13.014	12.866	12.472	11.946	10.63	8	8	8	8	8	8	8	75.752	0	0	0	0	0
								Medium_Lowland	PAN2423	40	2	2017-09-17	2017	rice	0	7098.9	1995.1	?	0	21.01	1.298	0.954	0.996	0	1	?	?	?	?	1678.3	8	14.325	13.298	12.869	12.296	10.864	8	8	8	8	8	8	8	81.488	0	0	0	0	0
								Medium_Lowland	PAN2423	40	2	2017-09-18	2017	rice	0	7249.8	2169.9	?	0	16.1	1.329	0.954	0.996	0	0.993	?	?	?	?	1678.3	8	8.466	8.946	8.869	8.767	8.511	8	8	8	8	8	8	8	87.229	0	0	0	0	0
								Medium_Lowland	PAN2423	40	2	2017-09-19	2017	rice	0	7353.4	2295	?	0	15.98	1.359	0.954	0.996	0	0.993	?	?	?	?	1678.3	8	13.136	12.385	12.03	11.556	10.37	8	8	8	8	8	8	8	88.779	0	0	0	0	0
								Medium_Lowland	PAN2423	40	2	2017-09-20	2017	rice	0	7451.2	2412.2	?	0	23.2	1.389	0.954	0.996	0	0.993	?	?	?	?	1678.3	8	10.464	10.321	10.133	9.882	9.254	8	8	8	8	8	8	8	100.322	0	0	0	0	0
								Medium_Lowland	PAN2423	40	2	2017-09-21	2017	rice	0	7568.8	2547.2	?	0	3.71	1.42	0.954	0.996	0	0.993	?	?	?	?	1678.3	8	10.016	10.196	10.018	9.781	9.187	8	8	8	8	8	8	8	92.229	0	0	0	0	0
								Medium_Lowland	PAN2423	40	2	2017-09-22	2017	rice	0	7685.3	2679.4	?	0	1.65	1.451	0.954	0.996	0	0.993	?	?	?	?	1678.3	8	11.335	11.374	11.1	10.736	9.824	8	8	8	8	8	8	8	80.272	0	0	0	0	0
								Medium_Lowland	PAN2423	40	2	2017-09-23	2017	rice	0	7797.3	2805.6	?	0	0.24	1.481	0.954	0.996	0	0.993	?	?	?	?	1678.3	8	12.275	12.196	11.856	11.402	10.268	8	8	8	8	8	8	8	65.647	0	0	0	0	0
								Medium_Lowland	PAN2423	40	2	2017-09-24	2017	rice	0	7898.5	2919.5	?	0	0.87	1.511	0.954	0.996	0	0.991	?	?	?	?	1678.3	8	12.921	12.723	12.34	11.83	10.553	8	8	8	8	8	8	8	50.877	0	0	0	0	0
								Medium_Lowland	PAN2423	40	2	2017-09-25	2017	rice	0	7992.2	3024.6	?	0	1.28	1.54	0.954	0.996	0	0.993	?	?	?	?	1678.3	8	13.309	12.895	12.498	11.969	10.646	8	8	8	8	8	8	8	36.423	0	0	0	0	0
								Medium_Lowland	PAN2423	40	2	2017-09-26	2017	rice	0	8079.5	3122.2	?	0	0.64	1.57	0.954	0.996	0	0.993	?	?	?	?	1678.3	8	12.554	12.288	11.941	11.477	10.318	8	8	8	8	8	8	8	22.168	0	0	0	0	0
								Medium_Lowland	PAN2423	40	2	2017-09-27	2017	rice	0	8152	3204	?	0	9.57	1.6	0.954	0.996	0	0.993	?	?	?	?	1678.3	8	12.774	12.095	11.763	11.32	10.213	8	8	8	8	8	8	8	17.544	0	0	0	0	0
								Medium_Lowland	PAN2423	40	2	2017-09-28	2017	rice	0	8226.5	3286.8	?	0	9.92	1.63	0.954	0.996	0	0.993	?	?	?	?	1678.3	8	10.181	10.338	10.149	9.896	9.264	8	8	8	8	8	8	8	15.344	0	0	0	0	0
								Medium_Lowland	PAN2423	40	2	2017-09-29	2017	rice	0	8273.7	3341.5	?	0	16.46	1.66	0.954	0.996	0	0.998	?	?	?	?	1678.3	8	11.797	11.253	10.989	10.638	9.758	8	8	8	8	8	8	8	18.94	0	0	0	0	0
								Medium_Lowland	PAN2423	40	2	2017-09-30	2017	rice	0	8320.1	3394.7	?	0	10.67	1.69	0.954	0.996	0	0.996	?	?	?	?	1678.3	8	9.451	9.376	9.265	9.116	8.744	8	8	8	8	8	8	8	19.232	0	0	0	0	0
								Medium_Lowland	PAN2423	40	2	2017-10-01	2017	rice	0	8334	3414.7	?	0	21.05	1.719	0.954	0.996	0	1	?	?	?	?	1678.3	8	9.649	9.564	9.438	9.268	8.846	8	8	8	8	8	8	8	29.946	0	0	0	0	0
								Medium_Lowland	PAN2423	40	2	2017-10-02	2017	rice	0	8385.8	3471.9	?	0	7.15	1.75	0.954	0.996	0	0.993	?	?	?	?	1678.3	8	8.191	8.516	8.474	8.418	8.279	8	8	8	8	8	8	8	27.452	0	0	0	0	0
								Medium_Lowland	PAN2423	40	2	2017-10-03	2017	rice	0	8427.8	3518.8	?	0	2.18	1.779	0.954	0.996	0	0.993	?	?	?	?	1678.3	8	11.21	10.794	10.568	10.266	9.51	8	8	8	8	8	8	8	17.031	0	0	0	0	0
								Medium_Lowland	PAN2423	40	2	2017-10-04	2017	rice	0	8469	3564.5	?	0	0.27	1.809	0.954	0.996	0	0.993	?	?	?	?	1678.3	8	9.499	9.917	9.762	9.555	9.036	8	8	8	8	8	8	8	5.391	0	0	0	0	0
								Medium_Lowland	PAN2423	40	2	2017-10-05	2017	rice	0	8500.1	3599.6	?	0	2.31	1.839	0.954	0.996	0	1	?	?	?	?	1678.3	6.96	7.041	6.254	5.986	5.63	4.738	4.8	6.96	6.96	6.96	6.96	6.96	6.96	0	0	0	0	0	0
								Medium_Lowland	PAN2423	40	2	2017-10-06	2017	rice	0	8532.3	3635.4	?	0	1.35	1.869	0.954	0.996	0	0.993	?	?	?	?	1678.3	6.96	0.966	0.878	0.855	1.14	2.5	4.709	6.96	6.96	6.96	6.96	6.96	6.96	0	0	0	0	0	0
								Medium_Lowland	PAN2423	40	2	2017-10-07	2017	rice	0	8583.9	3690.2	?	0	9.83	1.899	0.954	0.996	0	1	?	?	?	?	1678.3	6.96	9.194	9.054	8.734	7.991	5.488	4.46	6.96	6.96	6.96	6.96	6.96	6.96	0	0	0	0	0	0
								Medium_Lowland	PAN2423	40	2	2017-10-08	2017	rice	0	8649.5	3758.7	?	0	36.4	1.929	0.954	0.996	0	1	?	?	?	?	1678.3	6.96	18.489	18.429	18.338	18.217	17.915	12	6.96	6.96	6.96	6.96	6.96	6.96	0	0	0	0	0	0
								Medium_Lowland	PAN2423	40	2	2017-10-09	2017	rice	0	8676.3	3788.1	?	0	84.81	1.958	0.954	0.996	0	1	?	?	?	?	1678.3	8	11.132	11.067	10.97	10.841	10.518	9.871	8	8	8	8	8	8	0	0	0	0	0	0
								Medium_Lowland	PAN2423	40	2	2017-10-10	2017	rice	0	8768.8	3883	?	0	14.42	1.987	0.954	0.996	0.743	0.995	?	?	?	?	1678.3	8	8.443	8.42	8.386	8.341	8.227	8	8	8	8	8	8	8	0	0	0	0	0	0
								Medium_Lowland	PAN2423	40	2	2017-10-11	2017	rice	0	8868.9	3985.2	?	0	2.29	2.017	0.954	0.996	1	0.993	?	?	?	?	1678.3	6.96	1.604	1.634	1.487	1.292	2.5	4.8	6.96	6.96	6.96	6.96	6.96	6.96	0	0	0	0	0	0
								Medium_Lowland	PAN2423	40	2	2017-10-12	2017	rice	0	8964.7	4082.9	?	0	0.43	2.047	0.954	0.996	1	0.974	?	?	?	?	1678.3	6.96	-0.315	0.538	0.855	1.14	1.918	3.77	6.96	6.96	6.96	6.96	6.96	6.96	0	0	0	0	0	0
								Medium_Lowland	PAN2423	40	2	2017-10-13	2017	rice	0	9058.6	4178.6	?	0	3.75	2.077	0.954	0.996	1	0.922	?	?	?	?	1678.3	5.751	2.969	1.914	1.25	1.14	1.256	2.327	5.751	5.751	5.751	5.751	5.751	5.751	0	0	0	0	0	0
								Medium_Lowland	PAN2423	40	2	2017-10-14	2017	rice	0	9144.9	4266.4	?	0	3.81	2.107	0.954	0.996	1	0.889	?	?	?	?	1678.3	4.05	3.077	2.924	2.765	1.915	1.32	1.499	4.05	4.05	4.05	4.05	4.05	4.05	0	0	0	0	0	0
								Medium_Lowland	PAN2423	40	2	2017-10-15	2017	rice	0	9232.4	4355.2	?	0	0.17	2.136	0.954	0.996	1	0.836	?	?	?	?	1678.3	4.05	-0.643	0.501	0.855	1.14	1.002	0.935	2.804	4.05	4.05	4.05	4.05	4.05	0	0	0	0	0	0
								Medium_Lowland	PAN2423	40	2	2017-10-16	2017	rice	0	9318.7	4442.8	?	0	0.05	2.164	0.954	0.996	1	0.779	?	?	?	?	1678.3	4.05	-0.572	-0.736	0.528	1.063	0.762	0.434	1.856	4.05	4.05	4.05	4.05	4.05	0	0	0	0	0	0
								Medium_Lowland	PAN2423	40	2	2017-10-17	2017	rice	0	9404.2	4529.4	?	0	0.44	2.192	0.954	0.996	1	0.711	?	?	?	?	1678.3	4.05	-0.575	-0.345	-0.576	0.428	0.386	0	1.114	3.352	4.05	4.05	4.05	4.05	0	0	0	0	0	0
								Medium_Lowland	PAN2423	40	2	2017-10-18	2017	rice	0	9488.4	4614.6	?	0	6.84	2.22	0.954	0.996	1	0.778	?	?	?	?	1678.3	4.05	5.421	4.082	2.092	0.872	0.635	-0.172	0.668	2.547	4.05	4.05	4.05	4.05	0	0	0	0	0	0
								Medium_Lowland	PAN2423	40	2	2017-10-19	2017	rice	0	9559.8	4686.9	?	0	40.93	2.249	0.954	0.996	1	0.993	?	?	?	?	1678.3	4.05	32.679	32.302	32.161	30.566	25.123	12	5.132	3.322	4.05	4.05	4.05	4.05	0	0	0	0	0	0
								Medium_Lowland	PAN2423	40	2	2017-10-20	2017	rice	0	9576	4704	?	0	45.99	2.279	0.954	0.996	1	1	?	?	?	?	1678.3	4.05	13.301	13.139	13.047	12.924	12.616	12	6.96	4.05	4.05	4.05	4.05	4.05	0	0	0	0	0	0
								Medium_Lowland	PAN2423	40	2	2017-10-21	2017	rice	0	9612.6	4741.3	?	0	53.2	2.307	0.954	0.996	1	1	?	?	?	?	1678.3	4.05	12.237	12.224	12.206	12.182	12.121	12	7.338	4.5	4.05	4.05	4.05	4.05	0	0	0	0	0	0
								Medium_Lowland	PAN2423	40	2	2017-10-22	2017	rice	0	9692.5	4821.9	?	0	0.37	2.334	0.954	0.996	1	0.978	?	?	?	?	1678.3	4.482	-0.598	0.57	0.855	1.14	2.5	4.8	6.96	6.96	4.482	4.482	4.482	4.482	0	0	0	0	0	0
								Medium_Lowland	PAN2423	40	2	2017-10-23	2017	rice	0	9770.1	4900.1	?	0	0.06	2.362	0.954	0.996	1	0.946	?	?	?	?	1678.3	6.96	-0.789	-0.805	0.624	1.14	2.093	4.243	6.96	6.96	6.96	6.96	6.96	6.96	0	0	0	0	0	0
								Medium_Lowland	PAN2423	40	2	2017-10-24	2017	rice	0	9844	4974.5	?	0	1	2.389	0.954	0.996	1	0.855	?	?	?	?	1678.3	6.062	-0.397	-0.238	-0.531	0.533	1.093	2.631	6.062	6.062	6.062	6.062	6.062	6.062	0	0	0	0	0	0
								Medium_Lowland	PAN2423	40	2	2017-10-25	2017	rice	0	9914.8	5045.8	?	0	4.26	2.418	0.954	0.996	1	0.842	?	?	?	?	1678.3	4.221	2.8	1.736	0.798	0.32	0.506	1.461	4.221	4.221	4.221	4.221	4.221	4.221	0	0	0	0	0	0
								Medium_Lowland	PAN2423	40	2	2017-10-26	2017	fallow	0	0	0	?	0	0.39	0	1	1	1	1	?	?	?	?	0	4.05	-1.206	0.358	0.526	0.353	0.256	0.702	2.814	4.05	4.05	4.05	4.05	4.05	0	0	0	0	0	0
								Medium_Lowland	PAN2423	40	2	2017-10-27	2017	fallow	0	0	0	?	0	0.02	0	1	1	1	1	?	?	?	?	0	4.05	-0.923	-1.268	0.263	0.308	0.282	0.534	1.902	4.05	4.05	4.05	4.05	4.05	0	0	0	0	0	0
								Medium_Lowland	PAN2423	40	2	2017-10-28	2017	fallow	0	0	0	?	0	0	0	1	1	1	1	?	?	?	?	0	4.05	-1.038	-0.623	-0.984	0.154	0.218	0.408	1.304	3.426	4.05	4.05	4.05	4.05	0	0	0	0	0	0
								Medium_Lowland	PAN2423	40	2	2017-10-29	2017	fallow	0	0	0	?	0	0.05	0	1	1	1	1	?	?	?	?	0	4.05	-0.899	-0.933	-0.533	-0.965	0.109	0.288	0.898	2.667	4.05	4.05	4.05	4.05	0	0	0	0	0	0
								Medium_Lowland	PAN2423	40	2	2017-10-30	2017	fallow	0	0	0	?	0	1.13	0	1	1	1	1	?	?	?	?	0	4.05	-0.868	-0.734	-0.833	-0.595	-0.324	0.173	0.608	2.05	4.05	4.05	4.05	4.05	0	0	0	0	0	0
								Medium_Lowland	PAN2423	40	2	2017-10-31	2017	fallow	0	0	0	?	0	0.03	0	1	1	1	1	?	?	?	?	0	4.05	-0.866	-0.853	-0.742	-0.623	-0.332	-0.146	0.365	1.544	3.311	4.05	4.05	4.05	0	0	0	0	0	0
								Medium_Lowland	PAN2423	40	2	2017-11-01	2017	fallow	0	0	0	?	0	0	0	1	1	1	1	?	?	?	?	0	4.05	-0.862	-0.814	-0.732	-0.618	-0.354	-0.141	0.161	1.129	2.656	4.05	4.05	4.05	0	0	0	0	0	0
								Medium_Lowland	PAN2423	40	2	2017-11-02	2017	fallow	0	0	0	?	0	0	0	1	1	1	1	?	?	?	?	0	4.05	-0.794	-0.769	-0.704	-0.559	-0.357	-0.145	0.04	0.802	2.1	4.04	4.05	4.05	0	0	0	0	0	0
								Medium_Lowland	PAN2423	40	2	2017-11-03	2017	fallow	0	0	0	?	0	0	0	1	1	1	1	?	?	?	?	0	4.05	-0.71	-0.707	-0.644	-0.524	-0.353	-0.149	-0.234	0.562	1.639	3.32	4.05	4.05	0	0	0	0	0	0
								Medium_Lowland	PAN2423	40	2	2017-11-04	2017	fallow	0	0	0	?	0	0	0	1	1	1	1	?	?	?	?	0	4.05	-0.649	-0.647	-0.594	-0.495	-0.347	-0.167	0	0.323	1.244	2.697	4.05	4.05	0	0	0	0	0	0
								Medium_Lowland	PAN2423	40	2	2017-11-05	2017	fallow	0	0	0	?	0	0.03	0	1	1	1	1	?	?	?	?	0	4.05	-0.597	-0.596	-0.553	-0.471	-0.341	-0.167	-0.199	0.226	0.939	2.17	4.05	4.05	0	0	0	0	0	0
								Medium_Lowland	PAN2423	40	2	2017-11-06	2017	fallow	0	0	0	?	0	0.01	0	1	1	1	1	?	?	?	?	0	3.375	-0.555	-0.554	-0.518	-0.449	-0.334	-0.179	-0.184	0.098	0.687	1.725	3.375	3.375	0	0	0	0	0	0
								Medium_Lowland	PAN2423	40	2	2017-11-07	2017	fallow	0	0	0	?	0	0	0	1	1	1	1	?	?	?	?	0	2.769	-0.52	-0.52	-0.489	-0.43	-0.327	-0.187	-0.174	0.014	0.485	1.353	2.769	2.769	0	0	0	0	0	0
								Medium_Lowland	PAN2423	40	2	2017-11-08	2017	fallow	0	0	0	?	0	0	0	1	1	1	1	?	?	?	?	0	2.253	-0.491	-0.491	-0.465	-0.413	-0.322	-0.194	-0.167	0	0.339	1.049	2.253	2.253	0	0	0	0	0	0
								Medium_Lowland	PAN2423	40	2	2017-11-09	2017	fallow	0	0	0	?	0	0	0	1	1	1	1	?	?	?	?	0	1.818	-0.467	-0.466	-0.443	-0.399	-0.316	-0.199	-0.16	0	0.237	0.805	1.818	1.818	0	0	0	0	0	0
								Medium_Lowland	PAN2423	40	2	2017-11-10	2017	fallow	0	0	0	?	0	0	0	1	1	1	1	?	?	?	?	0	1.457	-0.445	-0.445	-0.425	-0.386	-0.311	-0.203	-0.154	0	0.166	0.614	1.457	1.457	0	0	0	0	0	0
								Medium_Lowland	PAN2423	40	2	2017-11-11	2017	fallow	0	0	0	?	0	0	0	1	1	1	1	?	?	?	?	0	1.35	-0.427	-0.426	-0.409	-0.374	-0.307	-0.205	-0.148	0	0.116	0.464	1.159	1.35	0	0	0	0	0	0
								Medium_Lowland	PAN2423	40	2	2017-11-12	2017	fallow	0	0	0	?	0	0	0	1	1	1	1	?	?	?	?	0	1.35	-0.41	-0.41	-0.395	-0.364	-0.302	-0.207	-0.143	0	0.081	0.35	0.916	1.35	0	0	0	0	0	0
								Medium_Lowland	PAN2423	40	2	2017-11-13	2017	fallow	0	0	0	?	0	0	0	1	1	1	1	?	?	?	?	0	1.35	-0.396	-0.395	-0.382	-0.354	-0.298	-0.208	-0.139	0	0.057	0.262	0.72	1.35	0	0	0	0	0	0
								Medium_Lowland	PAN2423	40	2	2017-11-14	2017	fallow	0	0	0	?	0	1.87	0	1	1	1	1	?	?	?	?	0	1.142	-0.383	-0.382	-0.37	-0.346	-0.294	-0.208	-0.135	0	0.04	0.195	0.563	1.142	0	0	0	0	0	0
								Medium_Lowland	PAN2423	40	2	2017-11-15	2017	fallow	0	0	0	?	0	24.74	0	1	1	1	1	?	?	?	?	0	0.931	23.321	20.897	17.634	13.657	5.618	1.346	0.33	0	0.028	0.145	0.437	0.931	0	0	0	0	0	0
								Medium_Lowland	PAN2423	40	2	2017-11-16	2017	fallow	0	0	0	?	0	5.85	0	1	1	1	1	?	?	?	?	0	0.754	4.574	5.272	5.272	5.272	5.272	2.916	1.364	0.152	0.065	0.121	0.342	0.754	0	0	0	0	0	0
								Medium_Lowland	PAN2423	40	2	2017-11-17	2017	fallow	0	0	0	?	0	2.67	0	1	1	1	1	?	?	?	?	0	0.614	1.185	1.394	1.394	1.394	2.5	2.75	1.918	0.682	0.25	0.16	0.288	0.614	0	0	0	0	0	0
								Medium_Lowland	PAN2423	40	2	2017-11-18	2017	fallow	0	0	0	?	0	3.98	0	1	1	1	1	?	?	?	?	0	0.514	1.809	2.495	2.495	2.495	2.5	2.65	2.211	1.141	0.517	0.267	0.281	0.514	0	0	0	0	0	0
								Medium_Lowland	PAN2423	40	2	2017-11-19	2017	fallow	0	0	0	?	0	0.22	0	1	1	1	1	?	?	?	?	0	0.458	-1.091	-1.267	0.855	1.14	2.5	2.59	2.362	1.507	0.814	0.431	0.326	0.458	0	0	0	0	0	0
								Medium_Lowland	PAN2423	40	2	2017-11-20	2017	fallow	0	0	0	?	0	0.01	0	1	1	1	1	?	?	?	?	0	0.446	-0.967	-0.58	-0.982	0.997	1.763	2.259	2.321	1.751	1.095	0.63	0.418	0.446	0	0	0	0	0	0
								Medium_Lowland	PAN2423	40	2	2017-11-21	2017	fallow	0	0	0	?	0	0.01	0	1	1	1	1	?	?	?	?	0	0.475	-0.614	-0.761	-0.432	0.008	0.885	1.71	2.077	1.849	1.321	0.838	0.544	0.475	0	0	0	0	0	0
								Medium_Lowland	PAN2423	40	2	2017-11-22	2017	fallow	0	0	0	?	0	0	0	1	1	1	1	?	?	?	?	0	0.539	-0.609	-0.538	-0.307	-0.609	0.443	1.203	1.727	1.812	1.469	1.027	0.689	0.539	0	0	0	0	0	0
								Medium_Lowland	PAN2423	40	2	2017-11-23	2017	fallow	0	0	0	?	0	0	0	1	1	1	1	?	?	?	?	0	0.628	-0.493	-0.419	-0.5	-0.357	-0.242	0.722	1.325	1.666	1.528	1.177	0.835	0.628	0	0	0	0	0	0
								Medium_Lowland	PAN2423	40	2	2017-11-24	2017	fallow	0	0	0	?	0	0	0	1	1	1	1	?	?	?	?	0	0.73	-0.423	-0.454	-0.412	-0.364	-0.177	0.336	0.929	1.445	1.503	1.275	0.967	0.73	0	0	0	0	0	0
								Medium_Lowland	PAN2423	40	2	2017-11-25	2017	fallow	0	0	0	?	0	0	0	1	1	1	1	?	?	?	?	0	0.832	-0.412	-0.412	-0.392	-0.33	-0.168	0.131	0.61	1.195	1.411	1.316	1.072	0.832	0	0	0	0	0	0
								Medium_Lowland	PAN2423	40	2	2017-11-26	2017	fallow	0	0	0	?	0	0	0	1	1	1	1	?	?	?	?	0	0.925	-0.38	-0.385	-0.361	-0.306	-0.175	0.011	0.371	0.947	1.272	1.302	1.141	0.925	0	0	0	0	0	0
								Medium_Lowland	PAN2423	40	2	2017-11-27	2017	fallow	0	0	0	?	0	0	0	1	1	1	1	?	?	?	?	0	0.999	-0.356	-0.358	-0.336	-0.29	-0.176	-0.128	0.222	0.73	1.109	1.244	1.172	0.999	0	0	0	0	0	0
								Medium_Lowland	PAN2423	40	2	2017-11-28	2017	fallow	0	0	0	?	0	0	0	1	1	1	1	?	?	?	?	0	1.049	-0.335	-0.336	-0.316	-0.276	-0.192	-0.12	0.082	0.536	0.937	1.152	1.166	1.049	0	0	0	0	0	0
								Medium_Lowland	PAN2423	40	2	2017-11-29	2017	fallow	0	0	0	?	0	0	0	1	1	1	1	?	?	?	?	0	1.073	-0.317	-0.317	-0.299	-0.269	-0.198	-0.118	0.002	0.375	0.769	1.037	1.127	1.073	0	0	0	0	0	0
								Medium_Lowland	PAN2423	40	2	2017-11-30	2017	fallow	0	0	0	?	0	0	0	1	1	1	1	?	?	?	?	0	1.07	-0.302	-0.301	-0.287	-0.262	-0.201	-0.117	-0.201	0.263	0.617	0.911	1.063	1.07	0	0	0	0	0	0
								Medium_Lowland	PAN2423	80	3	2016-06-01	2016	?	0	0	0	?	0	9.92	0	1	1	1	1	?	?	?	?	0	0.001	7.705	8.21	6.5	4.22	2.11	0.844	0.338	0.101	0.03	0.009	0.003	0.001	0	91.8	277.4	300.9	221	115.2
								Medium_Lowland	PAN2423	80	3	2016-06-02	2016	?	0	0	0	?	0	6.46	0	1	1	1	1	?	?	?	?	0	0.005	3.99	3.99	3.99	3.99	2.5	1.506	0.805	0.312	0.115	0.041	0.014	0.005	0	29.9	98.4	165.2	201.2	135.6
								Medium_Lowland	PAN2423	80	3	2016-06-03	2016	?	0	0	0	?	0	5.3	0	1	1	1	1	?	?	?	?	0	0.016	2.83	2.83	2.83	2.83	2.5	1.904	1.245	0.592	0.258	0.106	0.042	0.016	0	16.3	55.1	106.6	137.8	134.8
								Medium_Lowland	PAN2423	80	3	2016-06-04	2016	?	0	0	0	?	0	5.23	0	1	1	1	1	?	?	?	?	0	0.039	2.76	2.76	2.76	2.76	2.5	2.142	1.604	0.896	0.449	0.209	0.092	0.039	0	14.2	43.1	93.8	129.1	133.7
								Medium_Lowland	PAN2423	80	3	2016-06-05	2016	?	0	0	0	?	0	6.79	0	1	1	1	1	?	?	?	?	0	0.078	4.32	4.32	4.32	4.32	3.51	2.689	2.038	1.238	0.686	0.352	0.17	0.078	0	19.1	49.8	123.5	187	184.6
								Medium_Lowland	PAN2423	80	3	2016-06-06	2016	?	0	0	0	?	0	8.33	0	1	1	1	1	?	?	?	?	0	0.139	5.948	5.86	5.86	5.86	5.86	3.958	2.806	1.709	0.993	0.544	0.282	0.139	0	17.8	45.4	131	223.9	298.4
								Medium_Lowland	PAN2423	80	3	2016-06-07	2016	?	0	0	0	?	0	5.57	0	1	1	1	1	?	?	?	?	0	0.227	3.356	3.232	3.232	3.232	3.232	3.667	3.15	2.141	1.337	0.782	0.432	0.227	0	6.9	19.4	62.2	114.3	161.2
								Medium_Lowland	PAN2423	80	3	2016-06-08	2016	?	0	0	0	?	0	4.23	0	1	1	1	1	?	?	?	?	0	0.344	1.866	2.077	2.077	2.077	2.5	3.2	3.17	2.45	1.671	1.049	0.617	0.344	0	1.9	10.4	36.1	69.6	122.9
								Medium_Lowland	PAN2423	80	3	2016-06-09	2016	?	0	0	0	?	0	3.43	0	1	1	1	1	?	?	?	?	0	0.49	0.96	0.96	0.96	1.14	2.5	2.92	3.07	2.636	1.961	1.322	0.829	0.49	0	0.4	4.3	15.9	37.2	121.9
								Medium_Lowland	PAN2423	80	3	2016-06-10	2016	?	0	0	0	?	0	2.7	0	1	1	1	1	?	?	?	?	0	0.659	0.343	0.57	0.855	1.14	2.179	2.624	2.892	2.713	2.186	1.582	1.055	0.659	0	-0.4	2.4	13.7	36.4	105.3
								Medium_Lowland	PAN2423	80	3	2016-06-11	2016	?	0	0	0	?	0	2.24	0	1	1	1	1	?	?	?	?	0	0.846	-0.058	0.285	0.855	1.14	1.659	2.238	2.63	2.688	2.337	1.808	1.281	0.846	0	-0.9	1.2	13.5	35.6	79.4
								Medium_Lowland	PAN2423	80	3	2016-06-12	2016	?	0	0	0	?	0	8.4	0	1	1	1	1	?	?	?	?	0	1.04	5.645	5.075	4.22	3.47	2.5	2.343	2.515	2.636	2.427	1.994	1.495	1.04	0	8.8	15.2	51.3	95.4	115.8
								Medium_Lowland	PAN2423	80	3	2016-06-13	2016	?	0	0	0	?	0	21.37	0	1	1	1	1	?	?	?	?	0	1.24	19.53	18.72	18.72	18.72	16.349	7.863	4.655	3.242	2.671	2.197	1.705	1.24	0	10.1	22.5	109.3	309.6	608.5
								Medium_Lowland	PAN2423	80	3	2016-06-14	2016	?	0	0	0	?	0	10.75	0	1	1	1	1	?	?	?	?	0	1.35	8.535	9.346	9.346	9.346	9.346	9.346	6.531	4.05	3.085	2.463	1.933	1.35	0	1.3	6.3	35	114.1	307.6
								Medium_Lowland	PAN2423	80	3	2016-06-15	2016	?	0	0	0	?	0	7.46	0	1	1	1	1	?	?	?	?	0	1.35	4.99	4.99	4.99	4.99	4.99	4.99	5.915	4.05	3.374	2.737	2.174	1.35	0	0.6	2.2	14.3	50.9	152.9
								Medium_Lowland	PAN2423	80	3	2016-06-16	2016	?	0	0	0	?	0	2.91	0	1	1	1	1	?	?	?	?	0	2.218	0.483	0.57	0.855	1.14	2.5	4.8	5.469	4.05	3.577	2.989	2.418	2.218	0	-0.1	0.2	2.4	11.3	75.3
								Medium_Lowland	PAN2423	80	3	2016-06-17	2016	?	0	0	0	?	0	9.94	0	1	1	1	1	?	?	?	?	0	2.682	7.427	7.34	7.055	6.77	5.41	4.8	5.201	5.029	4.013	3.296	2.682	2.682	0	0.8	1.9	13.2	51.6	146.7
								Medium_Lowland	PAN2423	80	3	2016-06-18	2016	?	0	0	0	?	0	6.62	0	1	1	1	1	?	?	?	?	0	2.934	4.15	4.15	4.15	4.15	4.15	4.8	5.041	5.041	4.05	3.522	2.934	2.934	0	0.3	0.8	6.2	26.9	105.3
								Medium_Lowland	PAN2423	80	3	2016-06-19	2016	?	0	0	0	?	0	4.81	0	1	1	1	1	?	?	?	?	0	3.158	2.34	2.34	2.34	2.34	2.5	4.8	4.944	4.944	4.05	3.68	3.158	3.158	0	0.1	0.4	3	13.8	61
								Medium_Lowland	PAN2423	80	3	2016-06-20	2016	?	0	0	0	?	0	1.92	0	1	1	1	1	?	?	?	?	0	3.348	-0.268	0.295	0.855	1.14	2.5	3.944	4.544	4.544	4.05	3.791	3.348	3.348	0	-0.1	0	1.1	6.5	59.9
								Medium_Lowland	PAN2423	80	3	2016-06-21	2016	?	0	0	0	?	0	0.79	0	1	1	1	1	?	?	?	?	0	3.504	-0.824	-1.359	0.575	1.14	2.31	3.29	4.043	4.05	4.05	3.869	3.504	3.504	0	-0.3	-1.7	0.7	6.3	54.2
								Medium_Lowland	PAN2423	80	3	2016-06-22	2016	?	0	0	0	?	0	0.58	0	1	1	1	1	?	?	?	?	0	3.63	-1.087	-0.652	-1.115	0.715	1.512	2.579	3.457	4.05	4.05	3.923	3.63	3.63	0	-0.5	-1.2	-6.2	4	35.1
								Medium_Lowland	PAN2423	80	3	2016-06-23	2016	?	0	0	0	?	0	2.19	0	1	1	1	1	?	?	?	?	0	3.729	-0.404	-0.689	-0.393	-0.743	0.756	1.85	2.814	4.05	4.05	3.961	3.729	3.729	0	-0.5	-1.3	-2.6	-17.2	17.5
								Medium_Lowland	PAN2423	80	3	2016-06-24	2016	?	0	0	0	?	0	2.03	0	1	1	1	1	?	?	?	?	0	3.807	-0.508	-0.462	-0.583	-0.414	0.007	1.113	2.134	4.05	4.05	3.988	3.807	3.807	0	-0.5	-1.1	-4	-9.6	0.2
								Medium_Lowland	PAN2423	80	3	2016-06-25	2016	?	0	0	0	?	0	0.56	0	1	1	1	1	?	?	?	?	0	3.867	-1.016	-0.842	-0.659	-0.471	-0.32	0.668	1.547	3.389	4.05	4.007	3.867	3.867	0	-0.9	-2.1	-4.9	-11.1	-13.7
								Medium_Lowland	PAN2423	80	3	2016-06-26	2016	?	0	0	0	?	0	6.18	0	1	1	1	1	?	?	?	?	0	3.913	3.09	2.692	0.855	0.519	0	0.273	1.037	2.683	4.05	4.02	3.913	3.913	0	0.8	1.7	1.7	3.6	0
								Medium_Lowland	PAN2423	80	3	2016-06-27	2016	?	0	0	0	?	0	8.83	0	1	1	1	1	?	?	?	?	0	3.904	6.36	6.36	5.808	3.456	1.709	0.847	0.961	2.167	3.564	3.883	3.904	3.904	0	1.1	2.6	8.6	19	37.1
								Medium_Lowland	PAN2423	80	3	2016-06-28	2016	?	0	0	0	?	30	8.51	0	1	1	1	1	?	?	?	?	0	3.857	26.021	26.021	26.021	26.021	22.73	12	5.377	3.13	3.434	3.748	3.857	3.857	4.987	1.2	3.4	15.5	68.2	326.9
								Medium_Lowland	PAN2423	80	3	2016-06-29	2016	?	0	0	0	?	0	4.34	0	1	1	1	1	?	?	?	?	0	3.811	6.857	6.857	6.857	6.857	6.857	6.857	5.969	3.981	3.598	3.703	3.811	3.811	0	0.2	0.5	2.9	13.9	87.4
								Medium_Lowland	PAN2423	80	3	2016-06-30	2016	?	0	0	0	?	0	3.28	0	1	1	1	1	?	?	?	?	0	3.781	0.81	0.81	0.855	1.14	2.5	4.8	5.501	4.05	3.734	3.712	3.781	3.781	0	0	0.1	0.3	2.2	31.2
								Medium_Lowland	PAN2423	80	3	2016-07-01	2016	?	0	0	0	?	0	9.47	0	1	1	1	1	?	?	?	?	0	3.771	7	7	6.955	6.67	5.31	4.8	5.221	4.05	3.829	3.747	3.771	3.771	0	0.1	0.3	2	9.9	58.5
								Medium_Lowland	PAN2423	80	3	2016-07-02	2016	rice	0	3.8	0	?	0	28.72	0.015	1	1	1	1	?	?	?	?	2.3	3.791	13.79	13.79	13.79	13.79	13.79	12	6.96	5.372	4.05	3.838	3.791	3.791	9.923	0.1	0.3	2.1	12.6	119.3
								Medium_Lowland	PAN2423	80	3	2016-07-03	2016	rice	0	6.5	0	?	0	61.07	0.031	1	1	1	1	?	?	?	?	3.9	3.84	13.279	12	12	12	12	12	7.471	7.471	4.227	3.955	3.84	3.84	55.588	0.1	0.1	1	7	83.4
								Medium_Lowland	PAN2423	80	3	2016-07-04	2016	rice	0	9.3	0	?	0	21.97	0.046	1	1	1	1	?	?	?	?	5.6	3.903	8.193	8	8	8	8	8	8	8	8	4.05	3.903	3.903	67.88	0	0	0.4	3.4	47.7
								Medium_Lowland	PAN2423	80	3	2016-07-05	2016	rice	0	16.5	0	?	0	16.66	0.061	1	1	1	1	?	?	?	?	9.9	4.05	6.969	8	8	8	8	8	8	8	8	7.678	4.05	4.05	73.988	0	0	0.3	2.4	40.9
								Medium_Lowland	PAN2423	80	3	2016-07-06	2016	rice	0	26.6	0	?	0	6.15	0.077	1	1	1	1	?	?	?	?	15.9	7.235	7.862	8	8	8	8	8	8	8	8	8	7.235	7.235	68.314	0	0	0.2	1.8	35
								Medium_Lowland	PAN2423	80	3	2016-07-07	2016	rice	0	37.1	0	?	0	5.84	0.092	1	1	1	1	?	?	?	?	22.3	8	8.446	8	8	8	8	8	8	8	8	8	8	8	62.674	0	0	0.1	1.3	29.9
								Medium_Lowland	PAN2423	80	3	2016-07-08	2016	rice	0	57	0	?	0	9.53	0.107	1	1	1	1	?	?	?	?	34.2	8	7.251	8	8	8	8	8	8	8	8	8	8	8	59.937	0	0	0.1	0.9	25.5
								Medium_Lowland	PAN2423	80	3	2016-07-09	2016	rice	0	79.8	0	?	0	17.37	0.122	1	1	1	1	?	?	?	?	47.9	8	8.24	8	8	8	8	8	8	8	8	8	8	8	64.727	0	0	0.1	0.6	21.8
								Medium_Lowland	PAN2423	80	3	2016-07-10	2016	rice	0	113.3	0	?	0	4.58	0.137	1	1	1	1	?	?	?	?	68	8	7.76	8	8	8	8	8	8	8	8	8	8	8	56.451	0	0	0	0.5	18.6
								Medium_Lowland	PAN2423	80	3	2016-07-11	2016	rice	0	150.2	0	?	0	15.79	0.152	1	1	1	1	?	?	?	?	90.1	8	8.378	8	8	8	8	8	8	8	8	8	8	8	59.868	0	0	0	0.3	15.8
								Medium_Lowland	PAN2423	80	3	2016-07-12	2016	rice	0	184.4	0	?	0	7.89	0.167	1	1	1	1	?	?	?	?	110.6	8	8.766	8	8	8	8	8	8	8	8	8	8	8	56.786	0	0	0	0.2	13.4
								Medium_Lowland	PAN2423	80	3	2016-07-13	2016	rice	0	245.8	0	?	0	4.32	0.182	1	1	1	1	?	?	?	?	147.5	8	7.291	8	8	8	8	8	8	8	8	8	8	8	50.22	0	0	0	0.2	11.4
								Medium_Lowland	PAN2423	80	3	2016-07-14	2016	rice	0	284.8	0	?	0	8.36	0.197	1	1	1	1	?	?	?	?	170.9	8	8.577	8	8	8	8	8	8	8	8	8	8	8	47.561	0	0	0	0.1	9.7
								Medium_Lowland	PAN2423	80	3	2016-07-15	2016	rice	0	310.9	0	?	0	13.96	0.213	1	1	1	1	?	?	?	?	186.5	8	8.632	8	8	8	8	8	8	8	8	8	8	8	51.779	0	0	0	0.1	8.3
								Medium_Lowland	PAN2423	80	3	2016-07-16	2016	rice	0	348.5	0	?	0	21.22	0.228	1	1	1	1	?	?	?	?	209.1	8	7.471	8	8	8	8	8	8	8	8	8	8	8	63.361	0	0	0	0.1	7
								Medium_Lowland	PAN2423	80	3	2016-07-17	2016	rice	0	406.1	0	?	0	10.85	0.243	1	1	1	1	?	?	?	?	243.7	8	7.588	8	8	8	8	8	8	8	8	8	8	8	63.602	0	0	0	0	6
								Medium_Lowland	PAN2423	80	3	2016-07-18	2016	rice	0	455.5	0	?	0	5.77	0.258	1	1	1	1	?	?	?	?	273.3	8	8.093	8	8	8	8	8	8	8	8	8	8	8	58.445	0	0	0	0	5.1
								Medium_Lowland	PAN2423	80	3	2016-07-19	2016	rice	0	512.3	0	?	0	10.86	0.273	1	1	1	1	?	?	?	?	307.4	8	7.961	8	8	8	8	8	8	8	8	8	8	8	58.43	0	0	0	0	4.3
								Medium_Lowland	PAN2423	80	3	2016-07-20	2016	rice	0	577.2	0	?	0	3.68	0.288	1	1	1	1	?	?	?	?	346.3	8	7.796	8	8	8	8	8	8	8	8	8	8	8	50.992	0	0	0	0	3.7
								Medium_Lowland	PAN2423	80	3	2016-07-21	2016	rice	0	636.6	0	?	0	4.91	0.303	1	1	1	1	?	?	?	?	381.9	8	8.459	8	8	8	8	8	8	8	8	8	8	8	45.039	0	0	0	0	3.1
								Medium_Lowland	PAN2423	80	3	2016-07-22	2016	rice	0	83.5	0	?	0	13.34	0.319	1	1	1	1	?	?	?	?	50.1	8	8.363	8	8	8	8	8	8	8	8	8	8	8	48.337	0	0	0	0	2.6
								Medium_Lowland	PAN2423	80	3	2016-07-23	2016	rice	0	85.8	0	?	0	28.78	0.319	1	1	1	0.953	?	?	?	?	51.5	8	8.105	8	8	8	8	8	8	8	8	8	8	8	67.544	0	0	0	0	2.2
								Medium_Lowland	PAN2423	80	3	2016-07-24	2016	rice	0	91.3	0	?	0	8.56	0.319	1	1	1	0.934	?	?	?	?	54.8	8	7.414	8.039	8	8	8	8	8	8	8	8	8	8	65.907	0	0	0	0	1.9
								Medium_Lowland	PAN2423	80	3	2016-07-25	2016	rice	0	93.3	0	?	0	46.34	0.319	1	1	1	0.969	?	?	?	?	56	8	8.941	8.084	8.021	8	8	8	8	8	8	8	8	8	102.172	0	0	0	0	1.6
								Medium_Lowland	PAN2423	80	3	2016-07-26	2016	rice	0	98	0	?	0	22.19	0.319	1	1	1	0.969	?	?	?	?	58.8	8	7.507	8.036	8.014	8	8	8	8	8	8	8	8	8	114.648	0	0	0	0	1.4
								Medium_Lowland	PAN2423	80	3	2016-07-27	2016	rice	0	104.9	0	?	0	10.63	0.319	1	1	1	0.902	?	?	?	?	62.9	8	7.365	8.079	8.039	8	8	8	8	8	8	8	8	8	114.119	0	0	0	0	1.2
								Medium_Lowland	PAN2423	80	3	2016-07-28	2016	rice	0	112.8	0	?	0	0.6	0.319	1	1	1	0.881	?	?	?	?	67.7	8	7.822	8.143	8.082	8	8	8	8	8	8	8	8	8	102.004	0	0	0	0	1
								Medium_Lowland	PAN2423	80	3	2016-07-29	2016	rice	0	122.1	0	?	0	8.19	0.319	1	1	1	0.9	?	?	?	?	73.3	8	8.365	8.199	8.124	8.025	8	8	8	8	8	8	8	8	97.155	0	0	0	0	0.8
								Medium_Lowland	PAN2423	80	3	2016-07-30	2016	rice	0	130.3	0	?	0	8.02	0.319	1	1	1	0.966	?	?	?	?	78.2	8	9.004	8.222	8.148	8.049	8	8	8	8	8	8	8	8	93.221	0	0	0	0	0.7
								Medium_Lowland	PAN2423	80	3	2016-07-31	2016	rice	0	142.7	0	?	0	13.05	0.333	1	1	1	0.937	?	?	?	?	85.6	8	7.805	8.165	8.116	8.05	8	8	8	8	8	8	8	8	94.908	0	0	0	0	0.6
								Medium_Lowland	PAN2423	80	3	2016-08-01	2016	rice	0	153	0	?	0	30.95	0.348	1	1	1	0.981	?	?	?	?	91.8	8	9.07	8.273	8.198	8.099	8	8	8	8	8	8	8	8	114.718	0	0	0	0	0.5
								Medium_Lowland	PAN2423	80	3	2016-08-02	2016	rice	0	171.9	0	?	0	24.09	0.364	1	1	1	0.959	?	?	?	?	103.2	8	7.685	8.193	8.144	8.08	8	8	8	8	8	8	8	8	128.01	0	0	0	0	0.4
								Medium_Lowland	PAN2423	80	3	2016-08-03	2016	rice	0	200.4	0	?	0	15.7	0.379	1	1	1	0.937	?	?	?	?	120.3	8	8.018	8.372	8.286	8.172	8	8	8	8	8	8	8	8	131.616	0	0	0	0	0.4
								Medium_Lowland	PAN2423	80	3	2016-08-04	2016	rice	0	235.8	0	?	0	17.78	0.394	1	1	1	0.943	?	?	?	?	141.5	8	8.761	8.626	8.492	8.313	8	8	8	8	8	8	8	8	136.528	0	0	0	0	0.3
								Medium_Lowland	PAN2423	80	3	2016-08-05	2016	rice	0	263	0	?	0	19.24	0.409	1	1	1	0.985	?	?	?	?	157.8	8	9.736	8.75	8.6	8.4	8	8	8	8	8	8	8	8	143.819	0	0	0	0	0.3
								Medium_Lowland	PAN2423	80	3	2016-08-06	2016	rice	0	286	0	?	0	16.8	0.426	1	1	1	0.986	?	?	?	?	171.6	8	8.883	8.474	8.385	8.267	8	8	8	8	8	8	8	8	150.348	0	0	0	0	0.2
								Medium_Lowland	PAN2423	80	3	2016-08-07	2016	rice	0	310.5	0	?	0	22.95	0.443	1	1	1	0.987	?	?	?	?	186.3	8	8.546	8.39	8.322	8.23	8	8	8	8	8	8	8	8	163.597	0	0	0	0	0.2
								Medium_Lowland	PAN2423	80	3	2016-08-08	2016	rice	0	378.5	0	?	0	26.02	0.46	1	1	1	0.978	?	?	?	?	227.1	8	7.612	8.402	8.335	8.246	8.022	8	8	8	8	8	8	8	179.181	0	0	0	0	0.2
								Medium_Lowland	PAN2423	80	3	2016-08-09	2016	rice	0	450.1	0	?	0	26.03	0.477	1	1	0.401	0.988	?	?	?	?	270	8	9.682	9.241	9.045	8.784	8.131	8	8	8	8	8	8	8	193.276	0	0	0	0	0.1
								Medium_Lowland	PAN2423	80	3	2016-08-10	2016	rice	0	467.3	0	?	0	64.9	0.493	1	1	0.279	1	?	?	?	?	280.4	8	9.828	9.185	9.007	8.77	8.178	8	8	8	8	8	8	8	247.48	0	0	0	0	0.1
								Medium_Lowland	PAN2423	80	3	2016-08-11	2016	rice	0	551.1	0	?	0	18.08	0.51	1	1	0	0.978	?	?	?	?	330.7	8	7.461	8.316	8.271	8.211	8.06	8	8	8	8	8	8	8	255.504	0	0	0	0	0.1
								Medium_Lowland	PAN2423	80	3	2016-08-12	2016	rice	0	656.7	0	?	0	11.77	0.527	1	1	0	0.967	?	?	?	?	392.8	8	9.511	9.62	9.399	9.104	8.368	8	8	8	8	8	8	8	254.263	0	0	0	0	0.1
								Medium_Lowland	PAN2423	80	3	2016-08-13	2016	rice	0	776.1	0	?	0	2.7	0.543	1	1	0	0.956	?	?	?	?	460.6	8	10.04	10.222	9.932	9.546	8.58	8	8	8	8	8	8	8	242.458	0	0	0	0	0.1
								Medium_Lowland	PAN2423	80	3	2016-08-14	2016	rice	0	904.3	0	?	0	6.01	0.56	1	1	0	0.958	?	?	?	?	530.8	8	11.328	11.048	10.667	10.159	8.889	8	8	8	8	8	8	8	232.521	0	0	0	0	0.1
								Medium_Lowland	PAN2423	80	3	2016-08-15	2016	rice	0	1038.4	0	?	0	16.46	0.577	1	1	0	0.966	?	?	?	?	601.6	8	11.831	11.369	10.965	10.426	9.078	8	8	8	8	8	8	8	233.016	0	0	0	0	0.1
								Medium_Lowland	PAN2423	80	3	2016-08-16	2016	rice	0	1177.4	0	?	0	7.59	0.594	1	1	0	0.972	?	?	?	?	672	8	11.808	11.39	10.999	10.477	9.173	8	8	8	8	8	8	8	225.156	0	0	0	0	0
								Medium_Lowland	PAN2423	80	3	2016-08-17	2016	rice	0	1271.1	0	?	0	28.62	0.611	1	1	0	0.991	?	?	?	?	717.6	8	12.7	11.501	11.112	10.593	9.297	8	8	8	8	8	8	8	239.396	0	0	0	0	0
								Medium_Lowland	PAN2423	80	3	2016-08-18	2016	rice	0	1416.3	0	?	0	16.36	0.628	1	1	0	0.988	?	?	?	?	785.4	8	9.404	9.817	9.622	9.362	8.714	8	8	8	8	8	8	8	243.658	0	0	0	0	0
								Medium_Lowland	PAN2423	80	3	2016-08-19	2016	rice	0	1567	0	?	0	4.1	0.645	1	1	0	0.991	?	?	?	?	852.6	8	11.687	11.351	11.004	10.542	9.387	8	8	8	8	8	8	8	233.535	0	0	0	0	0
								Medium_Lowland	PAN2423	80	3	2016-08-20	2016	rice	0	1748.2	0	?	0	3.55	0.661	1	1	0	0.978	?	?	?	?	929.9	8	11.153	11.341	11.007	10.561	9.448	8	8	8	8	8	8	8	222.579	0	0	0	0	0
								Medium_Lowland	PAN2423	80	3	2016-08-21	2016	rice	0	1848.2	0	?	0	77.37	0.68	1	1	0	0.993	?	?	?	?	970.6	8	14.143	12.783	12.32	11.703	10.16	8	8	8	8	8	8	8	284.529	0	0	0	0	0
								Medium_Lowland	PAN2423	80	3	2016-08-22	2016	rice	0	1992.7	0	?	0	48.45	0.7	1	1	0	0.992	?	?	?	?	1026.1	8	9.647	9.746	9.582	9.364	8.818	8	8	8	8	8	8	8	299.222	0	0	0	0	0
								Medium_Lowland	PAN2423	80	3	2016-08-23	2016	rice	0	2207.3	0	?	0	3.36	0.719	1	1	0	0.983	?	?	?	?	1103.3	8	9.938	10.538	10.307	10	9.231	8	8	8	8	8	8	8	289.502	0	0	0	0	0
								Medium_Lowland	PAN2423	80	3	2016-08-24	2016	rice	0	2425.7	0	?	0	3.21	0.739	1	1	0	0.991	?	?	?	?	1176.9	8	13.753	13.196	12.738	12.127	10.598	8	8	8	8	8	8	8	276.244	0	0	0	0	0
								Medium_Lowland	PAN2423	80	3	2016-08-25	2016	rice	0	2621.7	0	?	0	4.03	0.758	1	1	0	0.993	?	?	?	?	1238.3	8	13.107	12.58	12.187	11.664	10.355	8	8	8	8	8	8	8	265.005	0	0	0	0	0
								Medium_Lowland	PAN2423	80	3	2016-08-26	2016	rice	0	2856.3	0	?	0	5.2	0.778	1	1	0	0.99	?	?	?	?	1306.4	8	11.681	11.797	11.48	11.059	10.004	8	8	8	8	8	8	8	255.734	0	0	0	0	0
								Medium_Lowland	PAN2423	80	3	2016-08-27	2016	rice	0	3092.4	0	?	0	2.49	0.798	1	1	0	0.986	?	?	?	?	1369.4	8	13.318	13.181	12.761	12.201	10.801	8	8	8	8	8	8	8	241.796	0	0	0	0	0
								Medium_Lowland	PAN2423	80	3	2016-08-28	2016	rice	0	3322.4	0	?	0	0.36	0.818	1	1	0	0.993	?	?	?	?	1425.2	8	14.595	13.917	13.437	12.797	11.198	8	8	8	8	8	8	8	225.148	0	0	0	0	0
								Medium_Lowland	PAN2423	80	3	2016-08-29	2016	rice	0	3554.2	0	?	0	4.15	0.837	1	1	0	0.993	?	?	?	?	1476	8	12.822	12.604	12.23	11.733	10.488	8	8	8	8	8	8	8	214.037	0	0	0	0	0
								Medium_Lowland	PAN2423	80	3	2016-08-30	2016	rice	0	3800.4	0	?	0	0.37	0.857	1	1	0	0.988	?	?	?	?	1524.1	8	12.825	12.819	12.428	11.907	10.605	8	8	8	8	8	8	8	198.629	0	0	0	0	0
								Medium_Lowland	PAN2423	80	3	2016-08-31	2016	rice	0	3914.3	0	?	0	7.96	0.877	1	1	0	0.997	?	?	?	?	1543.7	8	15.13	13.966	13.482	12.837	11.225	8	8	8	8	8	8	8	190.287	0	0	0	0	0
								Medium_Lowland	PAN2423	80	3	2016-09-01	2016	rice	0	4133.5	0	?	0	3.67	0.897	1	1	0	0.993	?	?	?	?	1576	8	9.656	9.889	9.736	9.531	9.021	8	8	8	8	8	8	8	182.569	0	0	0	0	0
								Medium_Lowland	PAN2423	80	3	2016-09-02	2016	rice	0	4361.8	0	?	0	7.22	0.917	1	1	0	0.993	?	?	?	?	1604.2	8	12.028	11.867	11.553	11.135	10.09	8	8	8	8	8	8	8	175.753	0	0	0	0	0
								Medium_Lowland	PAN2423	80	3	2016-09-03	2016	rice	0	4507.7	0	?	0	18.11	0.937	1	1	0	0.994	?	?	?	?	1618.7	8	12.673	12.071	11.741	11.301	10.201	8	8	8	8	8	8	8	179.984	0	0	0	0	0
								Medium_Lowland	PAN2423	80	3	2016-09-04	2016	rice	0	4738.8	0	?	0	19.21	0.957	1	1	0	0.993	?	?	?	?	1636	8	10.014	10.246	10.064	9.821	9.214	8	8	8	8	8	8	8	187.319	0	0	0	0	0
								Medium_Lowland	PAN2423	80	3	2016-09-05	2016	rice	0	4950.8	105.5	?	0	38.61	0.977	1	1	0	0.993	?	?	?	?	1646.9	8	12.219	11.94	11.62	11.194	10.13	8	8	8	8	8	8	8	211.89	0	0	0	0	0
								Medium_Lowland	PAN2423	80	3	2016-09-06	2016	rice	0	5096.3	184.8	?	0	17.35	0.997	1	1	0	0.994	?	?	?	?	1650.9	8	12.135	11.65	11.354	10.96	9.973	8	8	8	8	8	8	8	215.903	0	0	0	0	0
								Medium_Lowland	PAN2423	80	3	2016-09-07	2016	rice	0	5300.2	305.7	?	0	3.6	1.016	1	1	0	0.993	?	?	?	?	1651.6	8	10.127	10.265	10.081	9.836	9.224	8	8	8	8	8	8	8	207.69	0	0	0	0	0
								Medium_Lowland	PAN2423	80	3	2016-09-08	2016	rice	0	5509.7	474.6	?	0	2.62	1.046	1	1	0	0.993	?	?	?	?	1651.6	8	11.467	11.513	11.228	10.848	9.899	8	8	8	8	8	8	8	196.615	0	0	0	0	0
								Medium_Lowland	PAN2423	80	3	2016-09-09	2016	rice	0	5711.9	651.8	?	0	2.04	1.077	1	1	0	0.993	?	?	?	?	1651.6	8	12.757	12.489	12.125	11.64	10.426	8	8	8	8	8	8	8	183.693	0	0	0	0	0
								Medium_Lowland	PAN2423	80	3	2016-09-10	2016	rice	0	5913.1	841	?	0	1.95	1.107	1	1	0	0.993	?	?	?	?	1651.6	8	12.399	12.359	12.006	11.535	10.356	8	8	8	8	8	8	8	170.65	0	0	0	0	0
								Medium_Lowland	PAN2423	80	3	2016-09-11	2016	rice	0	6098.9	1029.5	?	0	8.4	1.136	1	1	0	0.993	?	?	?	?	1651.6	8	13.733	13.15	12.733	12.176	10.784	8	8	8	8	8	8	8	163.311	0	0	0	0	0
								Medium_Lowland	PAN2423	80	3	2016-09-12	2016	rice	0	6256.8	1204.1	?	0	14.9	1.166	1	1	0	0.993	?	?	?	?	1651.6	8	12.219	11.86	11.547	11.129	10.086	8	8	8	8	8	8	8	164.322	0	0	0	0	0
								Medium_Lowland	PAN2423	80	3	2016-09-13	2016	rice	0	6416.3	1388.8	?	0	7.73	1.195	1	1	0	0.993	?	?	?	?	1651.6	8	11.385	11.216	10.955	10.608	9.738	8	8	8	8	8	8	8	159.005	0	0	0	0	0
								Medium_Lowland	PAN2423	80	3	2016-09-14	2016	rice	0	6590.7	1596.2	?	0	5.05	1.225	1	1	0	0.993	?	?	?	?	1651.6	8	11.029	11.216	10.955	10.608	9.739	8	8	8	8	8	8	8	150.641	0	0	0	0	0
								Medium_Lowland	PAN2423	80	3	2016-09-15	2016	rice	0	6757.7	1794.8	?	0	1.98	1.255	0.954	0.994	0	0.993	?	?	?	?	1651.6	8	12.949	12.658	12.281	11.777	10.518	8	8	8	8	8	8	8	137.325	0	0	0	0	0
								Medium_Lowland	PAN2423	80	3	2016-09-16	2016	rice	0	6924.9	1990.3	?	0	1.87	1.285	0.954	0.994	0	0.993	?	?	?	?	1651.6	8	12.654	12.469	12.106	11.623	10.415	8	8	8	8	8	8	8	124.088	0	0	0	0	0
								Medium_Lowland	PAN2423	80	3	2016-09-17	2016	rice	0	7029.4	2120.4	?	0	11.93	1.315	0.954	0.994	0	0.994	?	?	?	?	1651.6	8	13.507	12.659	12.281	11.777	10.518	8	8	8	8	8	8	8	121.279	0	0	0	0	0
								Medium_Lowland	PAN2423	80	3	2016-09-18	2016	rice	0	7176.5	2290.5	?	0	1.71	1.345	0.954	0.994	0	0.993	?	?	?	?	1651.6	8	9.832	10.129	9.956	9.726	9.151	8	8	8	8	8	8	8	111.17	0	0	0	0	0
								Medium_Lowland	PAN2423	80	3	2016-09-19	2016	rice	0	7323.1	2457.8	?	0	2.51	1.375	0.954	0.994	0	0.993	?	?	?	?	1651.6	8	11.831	11.863	11.55	11.132	10.088	8	8	8	8	8	8	8	99.299	0	0	0	0	0
								Medium_Lowland	PAN2423	80	3	2016-09-20	2016	rice	0	7463.7	2617	?	0	1.32	1.405	0.954	0.994	0	0.993	?	?	?	?	1651.6	8	13.042	12.772	12.385	11.869	10.579	8	8	8	8	8	8	8	85.028	0	0	0	0	0
								Medium_Lowland	PAN2423	80	3	2016-09-21	2016	rice	0	7583.8	2753.9	?	0	13.71	1.435	0.954	0.994	0	0.993	?	?	?	?	1651.6	8	13.367	12.683	12.304	11.797	10.531	8	8	8	8	8	8	8	83.686	0	0	0	0	0
								Medium_Lowland	PAN2423	80	3	2016-09-22	2016	rice	0	7708.7	2893.9	?	0	7.32	1.465	0.954	0.994	0	0.993	?	?	?	?	1651.6	8	10.967	10.99	10.747	10.424	9.616	8	8	8	8	8	8	8	78.032	0	0	0	0	0
								Medium_Lowland	PAN2423	80	3	2016-09-23	2016	rice	0	7823	3021.8	?	0	10.47	1.495	0.954	0.994	0	0.993	?	?	?	?	1651.6	8	11.956	11.663	11.366	10.97	9.98	8	8	8	8	8	8	8	74.709	0	0	0	0	0
								Medium_Lowland	PAN2423	80	3	2016-09-24	2016	rice	0	7923	3134	?	0	9.53	1.524	0.954	0.994	0	0.993	?	?	?	?	1651.6	8	11.607	11.274	11.008	10.655	9.77	8	8	8	8	8	8	8	71.117	0	0	0	0	0
								Medium_Lowland	PAN2423	80	3	2016-09-25	2016	rice	0	8008.2	3230.2	?	0	8.01	1.554	0.954	0.994	0	0.993	?	?	?	?	1651.6	8	10.908	10.662	10.446	10.159	9.439	8	8	8	8	8	8	8	66.924	0	0	0	0	0
								Medium_Lowland	PAN2423	80	3	2016-09-26	2016	rice	0	8088	3319.8	?	0	8.03	1.584	0.954	0.994	0	0.993	?	?	?	?	1651.6	8	10.406	10.247	10.065	9.822	9.215	8	8	8	8	8	8	8	63.338	0	0	0	0	0
								Medium_Lowland	PAN2423	80	3	2016-09-27	2016	rice	0	8180.3	3421	?	0	2.75	1.614	0.954	0.994	0	0.993	?	?	?	?	1651.6	8	9.622	10.053	9.886	9.664	9.11	8	8	8	8	8	8	8	54.177	0	0	0	0	0
								Medium_Lowland	PAN2423	80	3	2016-09-28	2016	rice	0	8244.8	3493.6	?	0	13.81	1.643	0.954	0.994	0	0.994	?	?	?	?	1651.6	8	12.63	11.874	11.56	11.141	10.094	8	8	8	8	8	8	8	54.161	0	0	0	0	0
								Medium_Lowland	PAN2423	80	3	2016-09-29	2016	rice	0	8322.7	3578.7	?	0	3.98	1.673	0.954	0.994	0	0.993	?	?	?	?	1651.6	8	9.508	9.756	9.614	9.424	8.949	8	8	8	8	8	8	8	46.808	0	0	0	0	0
								Medium_Lowland	PAN2423	80	3	2016-09-30	2016	rice	0	8396.5	3659	?	0	2.07	1.703	0.954	0.994	0	0.993	?	?	?	?	1651.6	8	10.87	10.978	10.737	10.415	9.61	8	8	8	8	8	8	8	35.564	0	0	0	0	0
								Medium_Lowland	PAN2423	80	3	2016-10-01	2016	rice	0	8463.1	3731.5	?	0	4.99	1.733	0.954	0.994	0	0.993	?	?	?	?	1651.6	8	12.059	11.731	11.429	11.025	10.017	8	8	8	8	8	8	8	26.282	0	0	0	0	0
								Medium_Lowland	PAN2423	80	3	2016-10-02	2016	rice	0	8522.2	3795.9	?	0	2.94	1.764	0.954	0.994	0	0.993	?	?	?	?	1651.6	8	11.42	11.22	10.959	10.611	9.741	8	8	8	8	8	8	8	15.653	0	0	0	0	0
								Medium_Lowland	PAN2423	80	3	2016-10-03	2016	rice	0	8576.3	3854.6	?	0	0.72	1.792	0.954	0.994	0	0.993	?	?	?	?	1651.6	8	11.003	11.029	10.784	10.456	9.637	8	8	8	8	8	8	8	2.845	0	0	0	0	0
								Medium_Lowland	PAN2423	80	3	2016-10-04	2016	rice	0	8624.5	3907.1	?	0	1.11	1.822	0.954	0.994	0	0.993	?	?	?	?	1651.6	6.96	3.256	2.453	2.174	1.8	2.5	4.8	6.96	6.96	6.96	6.96	6.96	6.96	0	0	0	0	0	0
								Medium_Lowland	PAN2423	80	3	2016-10-05	2016	rice	0	8660	3946.5	?	0	3.49	1.852	0.954	0.994	0	1	?	?	?	?	1651.6	6.96	2.838	2.64	2.395	2.069	2.31	3.405	6.96	6.96	6.96	6.96	6.96	6.96	0	0	0	0	0	0
								Medium_Lowland	PAN2423	80	3	2016-10-06	2016	rice	0	8739.9	4029.8	?	0	9.69	1.882	0.954	0.994	0	0.993	?	?	?	?	1651.6	6.307	9.306	9.261	9.142	8.982	5.894	4.082	6.307	6.307	6.307	6.307	6.307	6.307	0	0	0	0	0	0
								Medium_Lowland	PAN2423	80	3	2016-10-07	2016	rice	0	8818.7	4111.7	?	0	6.55	1.912	0.954	0.994	0	0.998	?	?	?	?	1651.6	5.259	5.909	5.731	5.517	5.232	4.519	3.686	5.259	5.259	5.259	5.259	5.259	5.259	0	0	0	0	0	0
								Medium_Lowland	PAN2423	80	3	2016-10-08	2016	rice	0	8901.3	4197.1	?	0	8.91	1.942	0.954	0.994	0	0.997	?	?	?	?	1651.6	5.075	8.476	8.392	8.265	8.096	7.674	4.8	5.075	5.075	5.075	5.075	5.075	5.075	0	0	0	0	0	0
								Medium_Lowland	PAN2423	80	3	2016-10-09	2016	rice	0	8981.6	4279.9	?	0	4.54	1.971	0.954	0.994	0.775	0.999	?	?	?	?	1651.6	4.653	4.084	4.002	3.879	3.716	3.307	4.02	4.653	4.653	4.653	4.653	4.653	4.653	0	0	0	0	0	0
								Medium_Lowland	PAN2423	80	3	2016-10-10	2016	rice	0	9059	4359.6	?	0	12.73	2	0.954	0.994	1	0.999	?	?	?	?	1651.6	4.767	12.33	12.257	12.148	12.002	11.638	4.938	4.767	4.767	4.767	4.767	4.767	4.767	0	0	0	0	0	0
								Medium_Lowland	PAN2423	80	3	2016-10-11	2016	rice	0	9142.4	4445.1	?	0	6.79	2.03	0.954	0.994	1	0.996	?	?	?	?	1651.6	4.912	6.402	6.337	6.239	6.109	5.782	5.129	4.912	4.912	4.912	4.912	4.912	4.912	0	0	0	0	0	0
								Medium_Lowland	PAN2423	80	3	2016-10-12	2016	rice	0	9237.5	4541.9	?	0	4.17	2.059	0.954	0.994	1	0.993	?	?	?	?	1651.6	4.867	3.599	3.602	3.488	3.335	2.953	4.8	4.867	4.867	4.867	4.867	4.867	4.867	0	0	0	0	0	0
								Medium_Lowland	PAN2423	80	3	2016-10-13	2016	rice	0	9334	4640.1	?	0	0.92	2.087	0.954	0.994	1	0.992	?	?	?	?	1651.6	4.662	0.069	0.57	0.855	1.14	2.5	4.354	4.662	4.662	4.662	4.662	4.662	4.662	0	0	0	0	0	0
								Medium_Lowland	PAN2423	80	3	2016-10-14	2016	rice	0	9427.9	4735.5	?	0	0.04	2.114	0.954	0.994	1	0.938	?	?	?	?	1651.6	4.05	-0.621	0.172	0.638	1.102	1.836	2.892	3.954	4.05	4.05	4.05	4.05	4.05	0	0	0	0	0	0
								Medium_Lowland	PAN2423	80	3	2016-10-15	2016	rice	0	9520.1	4829	?	0	0.01	2.14	0.954	0.994	1	0.814	?	?	?	?	1651.6	4.05	-0.578	-0.77	0.238	0.561	0.927	1.672	3.041	4.05	4.05	4.05	4.05	4.05	0	0	0	0	0	0
								Medium_Lowland	PAN2423	80	3	2016-10-16	2016	rice	0	9610.1	4920.2	?	0	0	2.167	0.954	0.994	1	0.719	?	?	?	?	1651.6	4.05	-0.863	-0.522	-0.756	0.175	0.287	0.695	2.103	4.05	4.05	4.05	4.05	4.05	0	0	0	0	0	0
								Medium_Lowland	PAN2423	80	3	2016-10-17	2016	rice	0	9697.2	5008.4	?	0	0	2.193	0.954	0.994	1	0.654	?	?	?	?	1651.6	4.05	-0.785	-0.782	-0.447	-0.776	-0.189	0.005	1.264	3.514	4.05	4.05	4.05	4.05	0	0	0	0	0	0
								Medium_Lowland	PAN2423	80	3	2016-10-18	2016	rice	0	9784	5096.2	?	0	0	2.22	0.954	0.994	1	0.613	?	?	?	?	1651.6	4.05	-0.887	-0.726	-0.748	-0.588	-0.212	-0.246	0.758	2.687	4.05	4.05	4.05	4.05	0	0	0	0	0	0
								Medium_Lowland	PAN2423	80	3	2016-10-19	2016	rice	0	9868.8	5181.8	?	0	0	2.248	0.954	0.994	1	0.568	?	?	?	?	1651.6	4.05	-0.826	-0.757	-0.72	-0.447	-0.21	-0.266	0.356	1.988	4.05	4.05	4.05	4.05	0	0	0	0	0	0
								Medium_Lowland	PAN2423	80	3	2016-10-20	2016	rice	0	9950.6	5264.5	?	0	0	2.274	0.954	0.994	1	0.525	?	?	?	?	1651.6	4.05	-0.777	-0.703	-0.638	-0.369	-0.196	-0.288	0.107	1.424	3.289	4.05	4.05	4.05	0	0	0	0	0	0
								Medium_Lowland	PAN2423	80	3	2016-10-21	2016	rice	0	10030.3	5344.8	?	0	0	2.3	0.954	0.994	1	0.487	?	?	?	?	1651.6	4.05	-0.732	-0.579	-0.393	-0.305	-0.181	-0.303	-0.301	0.997	2.601	4.05	4.05	4.05	0	0	0	0	0	0
								Medium_Lowland	PAN2423	80	3	2016-10-22	2016	rice	0	10105.1	5420.3	?	0	0	2.327	0.954	0.994	1	0.453	?	?	?	?	1651.6	4.05	-0.606	-0.411	-0.298	-0.214	-0.174	-0.327	-0.25	0.607	2.003	3.988	4.05	4.05	0	0	0	0	0	0
								Medium_Lowland	PAN2423	80	3	2016-10-23	2016	rice	0	10176.5	5492.3	?	0	0	2.353	0.954	0.994	1	0.425	?	?	?	?	1651.6	4.05	-0.386	-0.319	-0.232	-0.155	-0.168	-0.34	-0.22	0.35	1.507	3.244	4.05	4.05	0	0	0	0	0	0
								Medium_Lowland	PAN2423	80	3	2016-10-24	2016	rice	0	10243.8	5560.1	?	0	0	2.377	0.954	0.994	1	0.4	?	?	?	?	1651.6	4.05	-0.301	-0.257	-0.186	-0.137	-0.141	-0.35	-0.203	0.179	1.109	2.603	4.05	4.05	0	0	0	0	0	0
								Medium_Lowland	PAN2423	80	3	2016-10-25	2016	rice	0	10309.8	5626.5	?	0	0	2.401	0.954	0.994	1	0.381	?	?	?	?	1651.6	3.974	-0.245	-0.215	-0.16	-0.124	-0.123	-0.353	-0.194	0.064	0.795	2.061	3.974	3.974	0	0	0	0	0	0
								Medium_Lowland	PAN2423	80	3	2016-10-26	2016	rice	0	10358.3	5675.5	?	0	5.05	2.426	0.954	0.994	1	0.426	?	?	?	?	1651.6	3.264	2.825	1.449	0.63	0.016	-0.1	-0.354	-0.189	0	0.557	1.61	3.264	3.264	0	0	0	0	0	0
								Medium_Lowland	PAN2423	80	3	2016-10-27	2016	rice	0	10417.6	5735.1	?	0	22.43	2.455	0.954	0.994	1	0.758	?	?	?	?	1651.6	2.658	21.557	19.801	16.207	11.425	4.355	-0.248	-0.182	0	0.39	1.244	2.658	2.658	0	0	0	0	0	0
								Medium_Lowland	PAN2423	80	3	2016-10-28	2016	fallow	0	0	0	?	0	1.95	0	1	1	1	1	?	?	?	?	0	2.146	-0.176	1.076	1.009	1.14	1.715	-0.18	-0.173	0	0.273	0.952	2.146	2.146	0	0	0	0	0	0
								Medium_Lowland	PAN2423	80	3	2016-10-29	2016	fallow	0	0	0	?	0	1.73	0	1	1	1	1	?	?	?	?	0	1.72	-0.399	0.283	0.855	1.14	1.161	-0.103	-0.164	0	0.191	0.724	1.72	1.72	0	0	0	0	0	0
								Medium_Lowland	PAN2423	80	3	2016-10-30	2016	fallow	0	0	0	?	0	1.46	0	1	1	1	1	?	?	?	?	0	1.368	-0.673	-1.271	0.569	1.14	0.897	0	-0.152	0	0.134	0.547	1.368	1.368	0	0	0	0	0	0
								Medium_Lowland	PAN2423	80	3	2016-10-31	2016	fallow	0	0	0	?	0	0.63	0	1	1	1	1	?	?	?	?	0	1.35	-1.105	-0.663	-1.026	0.602	0.478	0.191	-0.136	0	0.094	0.411	1.081	1.35	0	0	0	0	0	0
								Medium_Lowland	PAN2423	80	3	2016-11-01	2016	fallow	0	0	0	?	0	1.26	0	1	1	1	1	?	?	?	?	0	1.35	-0.803	-0.892	-0.51	-0.695	0.239	0.21	-0.12	0	0.066	0.307	0.849	1.35	0	0	0	0	0	0
								Medium_Lowland	PAN2423	80	3	2016-11-02	2016	fallow	0	0	0	?	0	0.02	0	1	1	1	1	?	?	?	?	0	1.318	-0.988	-0.797	-0.753	-0.538	-0.214	0.126	0.05	0	0.046	0.229	0.663	1.318	0	0	0	0	0	0
								Medium_Lowland	PAN2423	80	3	2016-11-03	2016	fallow	0	0	0	?	0	12.56	0	1	1	1	1	?	?	?	?	0	1.077	9.433	8.916	6.441	3.707	1.463	0.575	0.26	0	0.032	0.17	0.515	1.077	0	0	0	0	0	0
								Medium_Lowland	PAN2423	80	3	2016-11-04	2016	fallow	0	0	0	?	0	16.73	0	1	1	1	1	?	?	?	?	0	0.876	15.011	14.26	14.26	14.26	10.723	4.635	2.01	0.348	0.127	0.157	0.407	0.876	0	0	0	0	0	0
								Medium_Lowland	PAN2423	80	3	2016-11-05	2016	fallow	0	0	0	?	0	27.53	0	1	1	1	1	?	?	?	?	0	0.728	17.591	17.048	17.048	17.048	17.048	12	6.006	2.046	0.703	0.321	0.381	0.728	0	0	0	0	0	0
								Medium_Lowland	PAN2423	80	3	2016-11-06	2016	fallow	0	0	0	?	0	0.96	0	1	1	1	1	?	?	?	?	0	0.648	-1.078	0.57	0.855	1.14	2.5	4.8	5.524	3.089	1.418	0.65	0.462	0.648	0	0	0	0	0	0
								Medium_Lowland	PAN2423	80	3	2016-11-07	2016	fallow	0	0	0	?	0	0.34	0	1	1	1	1	?	?	?	?	0	0.649	-0.978	-1.381	0.713	1.14	2.39	4.8	5.234	3.733	2.113	1.089	0.65	0.649	0	0	0	0	0	0
								Medium_Lowland	PAN2423	80	3	2016-11-08	2016	fallow	0	0	0	?	0	0	0	1	1	1	1	?	?	?	?	0	0.731	-1.113	-0.668	-1.088	0.784	1.587	3.551	4.561	3.981	2.673	1.564	0.924	0.731	0	0	0	0	0	0
								Medium_Lowland	PAN2423	80	3	2016-11-09	2016	fallow	0	0	0	?	0	0	0	1	1	1	1	?	?	?	?	0	0.887	-0.964	-1.014	-0.579	-0.817	0.793	2.448	3.716	3.901	3.042	2.007	1.249	0.887	0	0	0	0	0	0
								Medium_Lowland	PAN2423	80	3	2016-11-10	2016	fallow	0	0	0	?	0	0	0	1	1	1	1	?	?	?	?	0	1.096	-0.981	-0.82	-0.819	-0.585	-0.484	1.469	2.817	3.576	3.202	2.366	1.584	1.096	0	0	0	0	0	0
								Medium_Lowland	PAN2423	80	3	2016-11-11	2016	fallow	0	0	0	?	0	0	0	1	1	1	1	?	?	?	?	0	1.334	-0.927	-0.884	-0.756	-0.678	-0.307	0.688	1.965	3.093	3.169	2.607	1.891	1.334	0	0	0	0	0	0
								Medium_Lowland	PAN2423	80	3	2016-11-12	2016	fallow	0	0	0	?	0	0	0	1	1	1	1	?	?	?	?	0	1.35	-0.913	-0.85	-0.776	-0.642	-0.286	0.29	1.295	2.553	2.984	2.72	2.14	1.35	0	0	0	0	0	0
								Medium_Lowland	PAN2423	80	3	2016-11-13	2016	fallow	0	0	0	?	0	0	0	1	1	1	1	?	?	?	?	0	1.715	-0.892	-0.846	-0.758	-0.623	-0.304	0.06	0.801	2.028	2.697	2.713	2.312	1.715	0	0	0	0	0	0
								Medium_Lowland	PAN2423	80	3	2016-11-14	2016	fallow	0	0	0	?	0	0	0	1	1	1	1	?	?	?	?	0	2.4	-0.876	-0.829	-0.741	-0.616	-0.318	-0.166	0.48	1.563	2.357	2.606	2.4	2.4	0	0	0	0	0	0
								Medium_Lowland	PAN2423	80	3	2016-11-15	2016	fallow	0	0	0	?	0	0	0	1	1	1	1	?	?	?	?	0	2.407	-0.276	-0.462	-0.528	-0.468	-0.322	-0.152	0.222	1.161	1.998	2.424	2.407	2.407	0	0	0	0	0	0
								Medium_Lowland	PAN2423	80	3	2016-11-16	2016	fallow	0	0	0	?	0	0	0	1	1	1	1	?	?	?	?	0	2.343	-0.382	-0.441	-0.452	-0.415	-0.315	-0.149	0.072	0.834	1.649	2.192	2.343	2.343	0	0	0	0	0	0
								Medium_Lowland	PAN2423	80	3	2016-11-17	2016	fallow	0	0	0	?	0	0	0	1	1	1	1	?	?	?	?	0	2.22	-0.363	-0.399	-0.406	-0.38	-0.303	-0.15	-0.191	0.584	1.33	1.933	2.22	2.22	0	0	0	0	0	0
								Medium_Lowland	PAN2423	80	3	2016-11-18	2016	fallow	0	0	0	?	0	0	0	1	1	1	1	?	?	?	?	0	2.053	-0.338	-0.365	-0.372	-0.352	-0.291	-0.162	0	0.351	1.036	1.664	2.053	2.053	0	0	0	0	0	0
								Medium_Lowland	PAN2423	80	3	2016-11-19	2016	fallow	0	0	0	?	0	0	0	1	1	1	1	?	?	?	?	0	1.858	-0.318	-0.34	-0.345	-0.33	-0.281	-0.159	-0.201	0.246	0.799	1.404	1.858	1.858	0	0	0	0	0	0
								Medium_Lowland	PAN2423	80	3	2016-11-20	2016	fallow	0	0	0	?	0	0	0	1	1	1	1	?	?	?	?	0	1.649	-0.302	-0.319	-0.323	-0.311	-0.271	-0.169	-0.185	0.112	0.593	1.161	1.649	1.649	0	0	0	0	0	0
								Medium_Lowland	PAN2423	80	3	2016-11-21	2016	fallow	0	0	0	?	0	0	0	1	1	1	1	?	?	?	?	0	1.436	-0.288	-0.302	-0.306	-0.296	-0.262	-0.175	-0.174	0.023	0.422	0.939	1.436	1.436	0	0	0	0	0	0
								Medium_Lowland	PAN2423	80	3	2016-11-22	2016	fallow	0	0	0	?	0	0	0	1	1	1	1	?	?	?	?	0	1.35	-0.276	-0.288	-0.291	-0.283	-0.255	-0.18	-0.166	0	0.295	0.746	1.229	1.35	0	0	0	0	0	0
								Medium_Lowland	PAN2423	80	3	2016-11-23	2016	fallow	0	0	0	?	0	0	0	1	1	1	1	?	?	?	?	0	1.35	-0.265	-0.276	-0.279	-0.272	-0.249	-0.183	-0.159	0	0.207	0.584	1.036	1.35	0	0	0	0	0	0
								Medium_Lowland	PAN2423	80	3	2016-11-24	2016	fallow	0	0	0	?	0	0	0	1	1	1	1	?	?	?	?	0	1.35	-0.256	-0.265	-0.268	-0.262	-0.243	-0.185	-0.152	0	0.145	0.452	0.861	1.35	0	0	0	0	0	0
								Medium_Lowland	PAN2423	80	3	2016-11-25	2016	fallow	0	0	0	?	0	0	0	1	1	1	1	?	?	?	?	0	1.285	-0.248	-0.256	-0.259	-0.254	-0.238	-0.186	-0.146	0	0.101	0.347	0.707	1.285	0	0	0	0	0	0
								Medium_Lowland	PAN2423	80	3	2016-11-26	2016	fallow	0	0	0	?	0	0	0	1	1	1	1	?	?	?	?	0	1.071	-0.24	-0.248	-0.25	-0.247	-0.233	-0.186	-0.141	0	0.071	0.264	0.574	1.071	0	0	0	0	0	0
								Medium_Lowland	PAN2423	80	3	2016-11-27	2016	fallow	0	0	0	?	0	0	0	1	1	1	1	?	?	?	?	0	0.889	-0.233	-0.24	-0.243	-0.24	-0.229	-0.186	-0.136	0	0.05	0.2	0.462	0.889	0	0	0	0	0	0
								Medium_Lowland	PAN2423	80	3	2016-11-28	2016	fallow	0	0	0	?	0	0	0	1	1	1	1	?	?	?	?	0	0.732	-0.227	-0.234	-0.236	-0.234	-0.225	-0.185	-0.131	0	0.035	0.15	0.368	0.732	0	0	0	0	0	0
								Medium_Lowland	PAN2423	80	3	2016-11-29	2016	fallow	0	0	0	?	0	0	0	1	1	1	1	?	?	?	?	0	0.6	-0.222	-0.227	-0.23	-0.229	-0.221	-0.184	-0.127	0	0.024	0.113	0.292	0.6	0	0	0	0	0	0
								Medium_Lowland	PAN2423	80	3	2016-11-30	2016	fallow	0	0	0	?	0	0	0	1	1	1	1	?	?	?	?	0	0.489	-0.216	-0.222	-0.225	-0.224	-0.217	-0.183	-0.124	0	0.017	0.084	0.229	0.489	0	0	0	0	0	0
								Medium_Lowland	PAN2423	80	3	2016-12-01	2016	fallow	0	0	0	?	0	0	0	1	1	1	1	?	?	?	?	0	0.396	-0.211	-0.217	-0.22	-0.219	-0.214	-0.181	-0.12	0	0.012	0.062	0.179	0.396	0	0	0	0	0	0
								Medium_Lowland	PAN2423	80	3	2016-12-02	2016	fallow	0	0	0	?	0	0	0	1	1	1	1	?	?	?	?	0	0.319	-0.207	-0.212	-0.215	-0.215	-0.21	-0.179	-0.117	0	0.008	0.046	0.139	0.319	0	0	0	0	0	0
								Medium_Lowland	PAN2423	80	3	2016-12-03	2016	fallow	0	0	0	?	0	0	0	1	1	1	1	?	?	?	?	0	0.256	-0.203	-0.208	-0.211	-0.211	-0.207	-0.177	-0.114	0	0.006	0.034	0.108	0.256	0	0	0	0	0	0
								Medium_Lowland	PAN2423	80	3	2016-12-04	2016	fallow	0	0	0	?	0	0	0	1	1	1	1	?	?	?	?	0	0.204	-0.199	-0.203	-0.206	-0.207	-0.204	-0.175	-0.111	-0.003	0.004	0.025	0.083	0.204	0	0	0	0	0	0
								Medium_Lowland	PAN2423	80	3	2016-12-05	2016	fallow	0	0	0	?	0	0	0	1	1	1	1	?	?	?	?	0	0.162	-0.195	-0.2	-0.203	-0.203	-0.2	-0.173	-0.108	-0.006	0.002	0.018	0.063	0.162	0	0	0	0	0	0
								Medium_Lowland	PAN2423	80	3	2016-12-06	2016	fallow	0	0	0	?	0	0	0	1	1	1	1	?	?	?	?	0	0.128	-0.191	-0.196	-0.199	-0.199	-0.197	-0.171	-0.106	-0.009	0	0.013	0.048	0.128	0	0	0	0	0	0
								Medium_Lowland	PAN2423	80	3	2016-12-07	2016	fallow	0	0	0	?	0	0	0	1	1	1	1	?	?	?	?	0	0.1	-0.188	-0.192	-0.195	-0.196	-0.194	-0.168	-0.104	-0.012	0	0.009	0.036	0.1	0	0	0	0	0	0
								Medium_Lowland	PAN2423	80	3	2016-12-08	2016	fallow	0	0	0	?	0	0	0	1	1	1	1	?	?	?	?	0	0.078	-0.185	-0.189	-0.192	-0.193	-0.191	-0.166	-0.102	-0.015	0	0.006	0.027	0.078	0	0	0	0	0	0
								Medium_Lowland	PAN2423	80	3	2016-12-09	2016	fallow	0	0	0	?	0	0	0	1	1	1	1	?	?	?	?	0	0.061	-0.182	-0.186	-0.189	-0.189	-0.188	-0.164	-0.1	-0.017	0	0.004	0.02	0.061	0	0	0	0	0	0
								Medium_Lowland	PAN2423	80	3	2016-12-10	2016	fallow	0	0	0	?	0	0	0	1	1	1	1	?	?	?	?	0	0.047	-0.179	-0.183	-0.186	-0.186	-0.185	-0.162	-0.099	-0.019	0	0.003	0.015	0.047	0	0	0	0	0	0
								Medium_Lowland	PAN2423	80	3	2016-12-11	2016	fallow	0	0	0	?	0	0	0	1	1	1	1	?	?	?	?	0	0.036	-0.176	-0.18	-0.183	-0.183	-0.183	-0.16	-0.097	-0.021	0	0.002	0.011	0.036	0	0	0	0	0	0
								Medium_Lowland	PAN2423	80	3	2016-12-12	2016	fallow	0	0	0	?	0	0.05	0	1	1	1	1	?	?	?	?	0	0.028	-0.14	-0.157	-0.168	-0.172	-0.179	-0.157	-0.096	-0.023	0	0.001	0.008	0.028	0	0	0	0	0	0
								Medium_Lowland	PAN2423	80	3	2016-12-13	2016	fallow	0	0	0	?	0	0	0	1	1	1	1	?	?	?	?	0	0.021	-0.164	-0.166	-0.169	-0.172	-0.175	-0.155	-0.095	-0.024	0	0.001	0.006	0.021	0	0	0	0	0	0
								Medium_Lowland	PAN2423	80	3	2016-12-14	2016	fallow	0	0	0	?	0	0	0	1	1	1	1	?	?	?	?	0	0.016	-0.166	-0.167	-0.169	-0.171	-0.173	-0.153	-0.094	-0.026	0	0.001	0.005	0.016	0	0	0	0	0	0
								Medium_Lowland	PAN2423	80	3	2016-12-15	2016	fallow	0	0	0	?	0	0.12	0	1	1	1	1	?	?	?	?	0	0.012	-0.084	-0.118	-0.141	-0.15	-0.167	-0.151	-0.093	-0.027	0	0.001	0.003	0.012	0	0	0	0	0	0
								Medium_Lowland	PAN2423	80	3	2016-12-16	2016	fallow	0	0	0	?	0	0	0	1	1	1	1	?	?	?	?	0	0.009	-0.147	-0.144	-0.147	-0.152	-0.163	-0.148	-0.092	-0.028	0	0	0.002	0.009	0	0	0	0	0	0
								Medium_Lowland	PAN2423	80	3	2016-12-17	2016	fallow	0	0	0	?	0	0	0	1	1	1	1	?	?	?	?	0	0.007	-0.154	-0.151	-0.152	-0.155	-0.16	-0.146	-0.091	-0.029	0	0	0.002	0.007	0	0	0	0	0	0
								Medium_Lowland	PAN2423	80	3	2016-12-18	2016	fallow	0	0	0	?	0	0	0	1	1	1	1	?	?	?	?	0	0.005	-0.155	-0.154	-0.154	-0.156	-0.158	-0.144	-0.09	-0.03	0	0	0.001	0.005	0	0	0	0	0	0
								Medium_Lowland	PAN2423	80	3	2016-12-19	2016	fallow	0	0	0	?	0	0	0	1	1	1	1	?	?	?	?	0	0.004	-0.155	-0.155	-0.155	-0.156	-0.156	-0.142	-0.089	-0.031	0	0	0.001	0.004	0	0	0	0	0	0
								Medium_Lowland	PAN2423	80	3	2016-12-20	2016	fallow	0	0	0	?	0	0	0	1	1	1	1	?	?	?	?	0	0.003	-0.154	-0.154	-0.155	-0.155	-0.155	-0.14	-0.089	-0.032	0	0	0.001	0.003	0	0	0	0	0	0
								Medium_Lowland	PAN2423	80	3	2016-12-21	2016	fallow	0	0	0	?	0	0	0	1	1	1	1	?	?	?	?	0	0.002	-0.152	-0.154	-0.154	-0.154	-0.153	-0.138	-0.088	-0.032	0	0	0	0.002	0	0	0	0	0	0
								Medium_Lowland	PAN2423	80	3	2016-12-22	2016	fallow	0	0	0	?	0	0	0	1	1	1	1	?	?	?	?	0	0.002	-0.151	-0.152	-0.153	-0.153	-0.152	-0.136	-0.087	-0.033	0	0	0	0.002	0	0	0	0	0	0
								Medium_Lowland	PAN2423	80	3	2016-12-23	2016	fallow	0	0	0	?	0	0	0	1	1	1	1	?	?	?	?	0	0.001	-0.15	-0.151	-0.152	-0.152	-0.15	-0.135	-0.086	-0.033	0	0	0	0.001	0	0	0	0	0	0
								Medium_Lowland	PAN2423	80	3	2016-12-24	2016	fallow	0	0	0	?	0	0	0	1	1	1	1	?	?	?	?	0	0.001	-0.148	-0.15	-0.151	-0.15	-0.149	-0.133	-0.086	-0.034	0	0	0	0.001	0	0	0	0	0	0
								Medium_Lowland	PAN2423	80	3	2016-12-25	2016	fallow	0	0	0	?	0	0	0	1	1	1	1	?	?	?	?	0	0.001	-0.147	-0.148	-0.149	-0.149	-0.147	-0.131	-0.085	-0.034	0	0	0	0.001	0	0	0	0	0	0
								Medium_Lowland	PAN2423	80	3	2016-12-26	2016	fallow	0	0	0	?	0	0	0	1	1	1	1	?	?	?	?	0	0.001	-0.145	-0.147	-0.148	-0.148	-0.146	-0.13	-0.084	-0.034	0	0	0	0.001	0	0	0	0	0	0
								Medium_Lowland	PAN2423	80	3	2016-12-27	2016	fallow	0	0	0	?	0	0	0	1	1	1	1	?	?	?	?	0	0	-0.144	-0.145	-0.146	-0.146	-0.144	-0.128	-0.084	-0.035	0	0	0	0	0	0	0	0	0	0
								Medium_Lowland	PAN2423	80	3	2016-12-28	2016	fallow	0	0	0	?	0	0	0	1	1	1	1	?	?	?	?	0	0	-0.142	-0.144	-0.145	-0.145	-0.143	-0.127	-0.083	-0.035	0	0	0	0	0	0	0	0	0	0
								Medium_Lowland	PAN2423	80	3	2016-12-29	2016	fallow	0	0	0	?	0	0	0	1	1	1	1	?	?	?	?	0	0	-0.141	-0.142	-0.143	-0.143	-0.141	-0.126	-0.083	-0.035	0	0	0	0	0	0	0	0	0	0
								Medium_Lowland	PAN2423	80	3	2016-12-30	2016	fallow	0	0	0	?	0	0	0	1	1	1	1	?	?	?	?	0	0	-0.139	-0.141	-0.142	-0.142	-0.14	-0.124	-0.082	-0.035	0	0	0	0	0	0	0	0	0	0
								Medium_Lowland	PAN2423	80	3	2016-12-31	2016	fallow	0	0	0	?	0	0	0	1	1	1	1	?	?	?	?	0	0	-0.138	-0.14	-0.14	-0.14	-0.138	-0.123	-0.082	-0.036	0	0	0	0	0	0	0	0	0	0
								Medium_Lowland	PAN2423	80	3	2017-01-01	2017	fallow	0	0	0	?	0	0	0	1	1	1	1	?	?	?	?	0	0	-0.137	-0.138	-0.139	-0.139	-0.137	-0.122	-0.081	-0.036	0	0	0	0	0	0	0	0	0	0
								Medium_Lowland	PAN2423	80	3	2017-01-02	2017	fallow	0	0	0	?	0	0.86	0	1	1	1	1	?	?	?	?	0	0	0.438	0.207	0.059	0.003	-0.113	-0.119	-0.08	-0.036	0	0	0	0	0	0	0	0	0	0
								Medium_Lowland	PAN2423	80	3	2017-01-03	2017	fallow	0	0	0	?	0	1.15	0	1	1	1	1	?	?	?	?	0	0	0.464	0.302	0.174	0.092	-0.079	-0.116	-0.08	-0.036	0	0	0	0	0	0	0	0	0	0
								Medium_Lowland	PAN2423	80	3	2017-01-04	2017	fallow	0	0	0	?	0	0.12	0	1	1	1	1	?	?	?	?	0	0	0.278	0.237	0.174	0.102	-0.05	-0.111	-0.079	-0.036	0	0	0	0	0	0	0	0	0	0
								Medium_Lowland	PAN2423	80	3	2017-01-05	2017	fallow	0	0	0	?	0	0.04	0	1	1	1	1	?	?	?	?	0	0	0.116	0.139	0.123	0.074	-0.033	-0.105	-0.078	-0.036	0	0	0	0	0	0	0	0	0	0
								Medium_Lowland	PAN2423	80	3	2017-01-06	2017	fallow	0	0	0	?	0	0	0	1	1	1	1	?	?	?	?	0	0	-0.04	0.025	0.046	0.024	-0.029	-0.1	-0.078	-0.036	0	0	0	0	0	0	0	0	0	0
								Medium_Lowland	PAN2423	80	3	2017-01-07	2017	fallow	0	0	0	?	0	0	0	1	1	1	1	?	?	?	?	0	0	-0.077	-0.028	-0.006	-0.013	-0.033	-0.096	-0.077	-0.036	0	0	0	0	0	0	0	0	0	0
								Medium_Lowland	PAN2423	80	3	2017-01-08	2017	fallow	0	0	0	?	0	0	0	1	1	1	1	?	?	?	?	0	0	-0.094	-0.059	-0.039	-0.037	-0.041	-0.092	-0.076	-0.036	0	0	0	0	0	0	0	0	0	0
								Medium_Lowland	PAN2423	80	3	2017-01-09	2017	fallow	0	0	0	?	0	0	0	1	1	1	1	?	?	?	?	0	0	-0.104	-0.078	-0.061	-0.055	-0.049	-0.089	-0.075	-0.036	0	0	0	0	0	0	0	0	0	0
								Medium_Lowland	PAN2423	80	3	2017-01-10	2017	fallow	0	0	0	?	0	0.01	0	1	1	1	1	?	?	?	?	0	0	-0.103	-0.086	-0.073	-0.066	-0.057	-0.086	-0.074	-0.036	0	0	0	0	0	0	0	0	0	0
								Medium_Lowland	PAN2423	80	3	2017-01-11	2017	fallow	0	0	0	?	0	0	0	1	1	1	1	?	?	?	?	0	0	-0.112	-0.096	-0.083	-0.076	-0.064	-0.085	-0.073	-0.036	0	0	0	0	0	0	0	0	0	0
								Medium_Lowland	PAN2423	80	3	2017-01-12	2017	fallow	0	0	0	?	0	0	0	1	1	1	1	?	?	?	?	0	0	-0.114	-0.102	-0.091	-0.083	-0.07	-0.083	-0.072	-0.036	0	0	0	0	0	0	0	0	0	0
								Medium_Lowland	PAN2423	80	3	2017-01-13	2017	fallow	0	0	0	?	0	0	0	1	1	1	1	?	?	?	?	0	0	-0.116	-0.106	-0.096	-0.088	-0.075	-0.082	-0.071	-0.035	0	0	0	0	0	0	0	0	0	0
								Medium_Lowland	PAN2423	80	3	2017-01-14	2017	fallow	0	0	0	?	0	0	0	1	1	1	1	?	?	?	?	0	0	-0.116	-0.108	-0.1	-0.093	-0.079	-0.082	-0.07	-0.035	0	0	0	0	0	0	0	0	0	0
								Medium_Lowland	PAN2423	80	3	2017-01-15	2017	fallow	0	0	0	?	0	0	0	1	1	1	1	?	?	?	?	0	0	-0.117	-0.11	-0.102	-0.096	-0.082	-0.081	-0.069	-0.035	0	0	0	0	0	0	0	0	0	0
								Medium_Lowland	PAN2423	80	3	2017-01-16	2017	fallow	0	0	0	?	0	0	0	1	1	1	1	?	?	?	?	0	0	-0.117	-0.111	-0.104	-0.098	-0.085	-0.081	-0.069	-0.035	0	0	0	0	0	0	0	0	0	0
								Medium_Lowland	PAN2423	80	3	2017-01-17	2017	fallow	0	0	0	?	0	0	0	1	1	1	1	?	?	?	?	0	0	-0.116	-0.112	-0.106	-0.1	-0.088	-0.081	-0.068	-0.035	0	0	0	0	0	0	0	0	0	0
								Medium_Lowland	PAN2423	80	3	2017-01-18	2017	fallow	0	0	0	?	0	0	0	1	1	1	1	?	?	?	?	0	0	-0.116	-0.112	-0.107	-0.101	-0.089	-0.081	-0.067	-0.035	0	0	0	0	0	0	0	0	0	0
								Medium_Lowland	PAN2423	80	3	2017-01-19	2017	fallow	0	0	0	?	0	0	0	1	1	1	1	?	?	?	?	0	0	-0.116	-0.112	-0.107	-0.102	-0.091	-0.08	-0.066	-0.034	0	0	0	0	0	0	0	0	0	0
								Medium_Lowland	PAN2423	80	3	2017-01-20	2017	fallow	0	0	0	?	0	0	0	1	1	1	1	?	?	?	?	0	0	-0.115	-0.112	-0.108	-0.103	-0.092	-0.08	-0.066	-0.034	0	0	0	0	0	0	0	0	0	0
								Medium_Lowland	PAN2423	80	3	2017-01-21	2017	fallow	0	0	0	?	0	0	0	1	1	1	1	?	?	?	?	0	0	-0.115	-0.112	-0.108	-0.103	-0.093	-0.08	-0.065	-0.034	0	0	0	0	0	0	0	0	0	0
								Medium_Lowland	PAN2423	80	3	2017-01-22	2017	fallow	0	0	0	?	0	0	0	1	1	1	1	?	?	?	?	0	0	-0.114	-0.112	-0.108	-0.104	-0.094	-0.081	-0.065	-0.034	0	0	0	0	0	0	0	0	0	0
								Medium_Lowland	PAN2423	80	3	2017-01-23	2017	fallow	0	0	0	?	0	0	0	1	1	1	1	?	?	?	?	0	0	-0.113	-0.111	-0.108	-0.104	-0.094	-0.081	-0.064	-0.033	0	0	0	0	0	0	0	0	0	0
								Medium_Lowland	PAN2423	80	3	2017-01-24	2017	fallow	0	0	0	?	0	0	0	1	1	1	1	?	?	?	?	0	0	-0.113	-0.111	-0.108	-0.104	-0.094	-0.081	-0.064	-0.033	0	0	0	0	0	0	0	0	0	0
								Medium_Lowland	PAN2423	80	3	2017-01-25	2017	fallow	0	0	0	?	0	0	0	1	1	1	1	?	?	?	?	0	0	-0.112	-0.11	-0.108	-0.104	-0.095	-0.081	-0.063	-0.033	0	0	0	0	0	0	0	0	0	0
								Medium_Lowland	PAN2423	80	3	2017-01-26	2017	fallow	0	0	0	?	0	0	0	1	1	1	1	?	?	?	?	0	0	-0.112	-0.11	-0.107	-0.104	-0.095	-0.081	-0.063	-0.033	0	0	0	0	0	0	0	0	0	0
								Medium_Lowland	PAN2423	80	3	2017-01-27	2017	fallow	0	0	0	?	0	0.01	0	1	1	1	1	?	?	?	?	0	0	-0.104	-0.106	-0.105	-0.102	-0.095	-0.08	-0.062	-0.033	0	0	0	0	0	0	0	0	0	0
								Medium_Lowland	PAN2423	80	3	2017-01-28	2017	fallow	0	0	0	?	0	0.01	0	1	1	1	1	?	?	?	?	0	0	-0.102	-0.103	-0.103	-0.1	-0.094	-0.08	-0.062	-0.032	0	0	0	0	0	0	0	0	0	0
								Medium_Lowland	PAN2423	80	3	2017-01-29	2017	fallow	0	0	0	?	0	0	0	1	1	1	1	?	?	?	?	0	0	-0.108	-0.106	-0.103	-0.101	-0.094	-0.08	-0.061	-0.032	0	0	0	0	0	0	0	0	0	0
								Medium_Lowland	PAN2423	80	3	2017-01-30	2017	fallow	0	0	0	?	0	0	0	1	1	1	1	?	?	?	?	0	0	-0.108	-0.106	-0.104	-0.101	-0.094	-0.08	-0.061	-0.032	0	0	0	0	0	0	0	0	0	0
								Medium_Lowland	PAN2423	80	3	2017-01-31	2017	fallow	0	0	0	?	0	0	0	1	1	1	1	?	?	?	?	0	0	-0.108	-0.106	-0.104	-0.101	-0.094	-0.08	-0.06	-0.032	0	0	0	0	0	0	0	0	0	0
								Medium_Lowland	PAN2423	80	3	2017-02-01	2017	fallow	0	0	0	?	0	0	0	1	1	1	1	?	?	?	?	0	0	-0.108	-0.106	-0.104	-0.101	-0.094	-0.08	-0.06	-0.032	-0.001	0	0	0	0	0	0	0	0	0
								Medium_Lowland	PAN2423	80	3	2017-02-02	2017	fallow	0	0	0	?	0	0	0	1	1	1	1	?	?	?	?	0	0	-0.107	-0.106	-0.104	-0.101	-0.093	-0.08	-0.06	-0.031	-0.002	0	0	0	0	0	0	0	0	0
								Medium_Lowland	PAN2423	80	3	2017-02-03	2017	fallow	0	0	0	?	0	0	0	1	1	1	1	?	?	?	?	0	0	-0.107	-0.105	-0.103	-0.101	-0.093	-0.079	-0.059	-0.031	-0.003	0	0	0	0	0	0	0	0	0
								Medium_Lowland	PAN2423	80	3	2017-02-04	2017	fallow	0	0	0	?	0	0	0	1	1	1	1	?	?	?	?	0	0	-0.106	-0.105	-0.103	-0.1	-0.093	-0.079	-0.059	-0.031	-0.004	0	0	0	0	0	0	0	0	0
								Medium_Lowland	PAN2423	80	3	2017-02-05	2017	fallow	0	0	0	?	0	0	0	1	1	1	1	?	?	?	?	0	0	-0.105	-0.105	-0.103	-0.1	-0.093	-0.079	-0.058	-0.031	-0.005	0	0	0	0	0	0	0	0	0
								Medium_Lowland	PAN2423	80	3	2017-02-06	2017	fallow	0	0	0	?	0	0	0	1	1	1	1	?	?	?	?	0	0	-0.105	-0.104	-0.102	-0.1	-0.093	-0.079	-0.058	-0.031	-0.005	0	0	0	0	0	0	0	0	0
								Medium_Lowland	PAN2423	80	3	2017-02-07	2017	fallow	0	0	0	?	0	0	0	1	1	1	1	?	?	?	?	0	0	-0.104	-0.104	-0.102	-0.099	-0.092	-0.079	-0.058	-0.031	-0.006	0	0	0	0	0	0	0	0	0
								Medium_Lowland	PAN2423	80	3	2017-02-08	2017	fallow	0	0	0	?	0	0	0	1	1	1	1	?	?	?	?	0	0	-0.104	-0.103	-0.101	-0.099	-0.092	-0.079	-0.058	-0.031	-0.007	0	0	0	0	0	0	0	0	0
								Medium_Lowland	PAN2423	80	3	2017-02-09	2017	fallow	0	0	0	?	0	0	0	1	1	1	1	?	?	?	?	0	0	-0.103	-0.103	-0.101	-0.098	-0.092	-0.078	-0.057	-0.031	-0.007	0	0	0	0	0	0	0	0	0
								Medium_Lowland	PAN2423	80	3	2017-02-10	2017	fallow	0	0	0	?	0	0	0	1	1	1	1	?	?	?	?	0	0	-0.103	-0.102	-0.1	-0.098	-0.091	-0.078	-0.057	-0.031	-0.008	0	0	0	0	0	0	0	0	0
								Medium_Lowland	PAN2423	80	3	2017-02-11	2017	fallow	0	0	0	?	0	0	0	1	1	1	1	?	?	?	?	0	0	-0.102	-0.102	-0.1	-0.098	-0.091	-0.078	-0.057	-0.031	-0.008	0	0	0	0	0	0	0	0	0
								Medium_Lowland	PAN2423	80	3	2017-02-12	2017	fallow	0	0	0	?	0	0	0	1	1	1	1	?	?	?	?	0	0	-0.102	-0.101	-0.1	-0.097	-0.091	-0.078	-0.056	-0.031	-0.009	0	0	0	0	0	0	0	0	0
								Medium_Lowland	PAN2423	80	3	2017-02-13	2017	fallow	0	0	0	?	0	0	0	1	1	1	1	?	?	?	?	0	0	-0.101	-0.101	-0.099	-0.097	-0.091	-0.077	-0.056	-0.031	-0.009	0	0	0	0	0	0	0	0	0
								Medium_Lowland	PAN2423	80	3	2017-02-14	2017	fallow	0	0	0	?	0	0	0	1	1	1	1	?	?	?	?	0	0	-0.101	-0.1	-0.099	-0.096	-0.09	-0.077	-0.056	-0.031	-0.01	0	0	0	0	0	0	0	0	0
								Medium_Lowland	PAN2423	80	3	2017-02-15	2017	fallow	0	0	0	?	0	0	0	1	1	1	1	?	?	?	?	0	0	-0.1	-0.1	-0.098	-0.096	-0.09	-0.077	-0.056	-0.031	-0.01	0	0	0	0	0	0	0	0	0
								Medium_Lowland	PAN2423	80	3	2017-02-16	2017	fallow	0	0	0	?	0	0	0	1	1	1	1	?	?	?	?	0	0	-0.1	-0.099	-0.098	-0.095	-0.089	-0.077	-0.055	-0.031	-0.01	0	0	0	0	0	0	0	0	0
								Medium_Lowland	PAN2423	80	3	2017-02-17	2017	fallow	0	0	0	?	0	0	0	1	1	1	1	?	?	?	?	0	0	-0.099	-0.099	-0.097	-0.095	-0.089	-0.076	-0.055	-0.031	-0.011	0	0	0	0	0	0	0	0	0
								Medium_Lowland	PAN2423	80	3	2017-02-18	2017	fallow	0	0	0	?	0	0	0	1	1	1	1	?	?	?	?	0	0	-0.099	-0.098	-0.097	-0.095	-0.089	-0.076	-0.055	-0.031	-0.011	0	0	0	0	0	0	0	0	0
								Medium_Lowland	PAN2423	80	3	2017-02-19	2017	fallow	0	0	0	?	0	0	0	1	1	1	1	?	?	?	?	0	0	-0.098	-0.098	-0.096	-0.094	-0.088	-0.076	-0.055	-0.031	-0.011	0	0	0	0	0	0	0	0	0
								Medium_Lowland	PAN2423	80	3	2017-02-20	2017	fallow	0	0	0	?	0	0	0	1	1	1	1	?	?	?	?	0	0	-0.098	-0.097	-0.096	-0.094	-0.088	-0.076	-0.055	-0.031	-0.012	0	0	0	0	0	0	0	0	0
								Medium_Lowland	PAN2423	80	3	2017-02-21	2017	fallow	0	0	0	?	0	0.01	0	1	1	1	1	?	?	?	?	0	0	-0.091	-0.093	-0.093	-0.092	-0.087	-0.075	-0.054	-0.031	-0.012	0	0	0	0	0	0	0	0	0
								Medium_Lowland	PAN2423	80	3	2017-02-22	2017	fallow	0	0	0	?	0	0.01	0	1	1	1	1	?	?	?	?	0	0	-0.089	-0.091	-0.091	-0.09	-0.087	-0.075	-0.054	-0.031	-0.012	0	0	0	0	0	0	0	0	0
								Medium_Lowland	PAN2423	80	3	2017-02-23	2017	fallow	0	0	0	?	0	0.17	0	1	1	1	1	?	?	?	?	0	0	0.019	-0.025	-0.053	-0.063	-0.081	-0.074	-0.054	-0.031	-0.012	0	0	0	0	0	0	0	0	0
								Medium_Lowland	PAN2423	80	3	2017-02-24	2017	fallow	0	0	0	?	0	0.02	0	1	1	1	1	?	?	?	?	0	0	-0.059	-0.057	-0.059	-0.065	-0.078	-0.074	-0.054	-0.031	-0.012	0	0	0	0	0	0	0	0	0
								Medium_Lowland	PAN2423	80	3	2017-02-25	2017	fallow	0	0	0	?	0	0	0	1	1	1	1	?	?	?	?	0	0	-0.083	-0.073	-0.07	-0.072	-0.076	-0.073	-0.053	-0.031	-0.013	0	0	0	0	0	0	0	0	0
								Medium_Lowland	PAN2423	80	3	2017-02-26	2017	fallow	0	0	0	?	0	0	0	1	1	1	1	?	?	?	?	0	0	-0.088	-0.081	-0.077	-0.077	-0.076	-0.072	-0.053	-0.031	-0.013	0	0	0	0	0	0	0	0	0
								Medium_Lowland	PAN2423	80	3	2017-02-27	2017	fallow	0	0	0	?	0	0	0	1	1	1	1	?	?	?	?	0	0	-0.09	-0.085	-0.081	-0.08	-0.076	-0.072	-0.053	-0.031	-0.013	0	0	0	0	0	0	0	0	0
								Medium_Lowland	PAN2423	80	3	2017-02-28	2017	fallow	0	0	0	?	0	0	0	1	1	1	1	?	?	?	?	0	0	-0.091	-0.087	-0.084	-0.082	-0.077	-0.071	-0.053	-0.031	-0.013	0	0	0	0	0	0	0	0	0
								Medium_Lowland	PAN2423	80	3	2017-03-01	2017	fallow	0	0	0	?	0	0	0	1	1	1	1	?	?	?	?	0	0	-0.092	-0.089	-0.086	-0.083	-0.077	-0.071	-0.053	-0.031	-0.013	0	0	0	0	0	0	0	0	0
								Medium_Lowland	PAN2423	80	3	2017-03-02	2017	fallow	0	0	0	?	0	0	0	1	1	1	1	?	?	?	?	0	0	-1.086	-0.686	-0.428	-0.328	-0.118	-0.072	-0.053	-0.031	-0.013	0	0	0	0	0	0	0	0	0
								Medium_Lowland	PAN2423	80	3	2017-03-03	2017	fallow	0	0	0	?	0	0	0	1	1	1	1	?	?	?	?	0	0	-0.375	-0.396	-0.367	-0.289	-0.14	-0.075	-0.052	-0.031	-0.014	0	0	0	0	0	0	0	0	0
								Medium_Lowland	PAN2423	80	3	2017-03-04	2017	fallow	0	0	0	?	0	0	0	1	1	1	1	?	?	?	?	0	0	-0.277	-0.313	-0.303	-0.249	-0.15	-0.078	-0.052	-0.031	-0.014	0	0	0	0	0	0	0	0	0
								Medium_Lowland	PAN2423	80	3	2017-03-05	2017	fallow	0	0	0	?	0	1.24	0	1	1	1	1	?	?	?	?	0	0	-0.248	-0.27	-0.261	-0.225	-0.154	-0.08	-0.052	-0.031	-0.014	0	0	0	0	0	0	0	0	0
								Medium_Lowland	PAN2423	80	3	2017-03-06	2017	fallow	0	0	0	?	0	1.46	0	1	1	1	1	?	?	?	?	0	0	-0.232	-0.244	-0.236	-0.21	-0.155	-0.083	-0.052	-0.031	-0.014	0	0	0	0	0	0	0	0	0
								Medium_Lowland	PAN2423	80	3	2017-03-07	2017	fallow	0	0	0	?	0	0.07	0	1	1	1	1	?	?	?	?	0	0	-0.222	-0.227	-0.22	-0.199	-0.154	-0.085	-0.053	-0.031	-0.014	0	0	0	0	0	0	0	0	0
								Medium_Lowland	PAN2423	80	3	2017-03-08	2017	fallow	0	0	0	?	0	14.6	0	1	1	1	1	?	?	?	?	0	0	12.959	11.514	8.78	5.362	2.316	0.055	-0.05	-0.031	-0.014	0	0	0	0	0	0	0	0	0
								Medium_Lowland	PAN2423	80	3	2017-03-09	2017	fallow	0	0	0	?	0	2.89	0	1	1	1	1	?	?	?	?	0	0	0.764	1.786	1.786	1.786	1.178	0.353	-0.041	-0.031	-0.014	0	0	0	0	0	0	0	0	0
								Medium_Lowland	PAN2423	80	3	2017-03-10	2017	fallow	0	0	0	?	0	10.68	0	1	1	1	1	?	?	?	?	0	0	8.254	8.343	8.343	8.343	4.522	2.173	0.014	-0.03	-0.014	0	0	0	0	0	0	0	0	0.1
								Medium_Lowland	PAN2423	80	3	2017-03-11	2017	fallow	0	0	0	?	0	35.29	0	1	1	1	1	?	?	?	?	0	0	21.387	21.387	21.387	21.387	21.387	12	4.646	0.112	-0.01	0	0	0	0	0	0	0	0	0.2
								Medium_Lowland	PAN2423	80	3	2017-03-12	2017	fallow	0	0	0	?	0	4.3	0	1	1	1	1	?	?	?	?	0	0	1.83	1.83	1.83	1.83	2.5	4.8	4.518	1.29	0.036	0	0	0	0	0	0	0	0	0
								Medium_Lowland	PAN2423	80	3	2017-03-13	2017	fallow	0	0	0	?	0	0.12	0	1	1	1	1	?	?	?	?	0	0	-1.096	-1.297	0.855	1.14	2.5	4.8	4.631	2.058	0.355	0	0	0	0	0	0	0	0	0
								Medium_Lowland	PAN2423	80	3	2017-03-14	2017	fallow	0	0	0	?	0	0	0	1	1	1	1	?	?	?	?	0	0.026	-1.163	-0.698	-1.067	0.997	1.984	3.753	4.28	2.724	0.966	0.289	0.087	0.026	0	0	0	0	0	0
								Medium_Lowland	PAN2423	80	3	2017-03-15	2017	fallow	0	0	0	?	0	0	0	1	1	1	1	?	?	?	?	0	0.097	-1.008	-1.032	-0.589	-0.659	0.992	2.649	3.627	2.995	1.575	0.674	0.263	0.097	0	0	0	0	0	0
								Medium_Lowland	PAN2423	80	3	2017-03-16	2017	fallow	0	0	0	?	0	0	0	1	1	1	1	?	?	?	?	0	0.219	-1.016	-0.845	-0.765	0	0.167	1.656	2.839	2.948	1.987	1.068	0.505	0.219	0	0	0	0	0	0
								Medium_Lowland	PAN2423	80	3	2017-03-17	2017	fallow	0	0	0	?	0	0.08	0	1	1	1	1	?	?	?	?	0	0.386	-0.867	-0.826	-0.472	-0.868	0.083	1.027	2.114	2.698	2.2	1.408	0.775	0.386	0	0	0	0	0	0
								Medium_Lowland	PAN2423	80	3	2017-03-18	2017	fallow	0	0	0	?	0	0.25	0	1	1	1	1	?	?	?	?	0	0.582	-0.78	-0.657	-0.747	-0.534	-0.405	0.616	1.515	2.343	2.243	1.658	1.04	0.582	0	0	0	0	0	0
								Medium_Lowland	PAN2423	80	3	2017-03-19	2017	fallow	0	0	0	?	0	2.26	0	1	1	1	1	?	?	?	?	0	0.789	-0.359	-0.514	-0.523	-0.489	-0.323	0.208	0.992	1.938	2.151	1.806	1.27	0.789	0	0	0	0	0	0
								Medium_Lowland	PAN2423	80	3	2017-03-20	2017	fallow	0	0	0	?	0	11.77	0	1	1	1	1	?	?	?	?	0	0.986	8.832	8.412	5.851	2.954	0.937	0.37	0.743	1.579	1.98	1.858	1.447	0.986	0	0	0	0	0	0
								Medium_Lowland	PAN2423	80	3	2017-03-21	2017	fallow	0	0	0	?	0	0	0	1	1	1	1	?	?	?	?	0	1.159	-1.096	-1.297	0.855	1.14	1.039	0.638	0.701	1.316	1.781	1.835	1.563	1.159	0	0	0	0	0	0
								Medium_Lowland	PAN2423	80	3	2017-03-22	2017	fallow	0	0	0	?	0	0.12	0	1	1	1	1	?	?	?	?	0	1.298	-1.163	-0.698	-1.067	0.997	1.018	0.79	0.737	1.142	1.589	1.761	1.623	1.298	0	0	0	0	0	0
								Medium_Lowland	PAN2423	80	3	2017-03-23	2017	fallow	0	0	0	?	0	0	0	1	1	1	1	?	?	?	?	0	1.35	-1.008	-1.032	-0.589	-0.576	0.509	0.678	0.713	1.013	1.416	1.658	1.633	1.35	0	0	0	0	0	0
								Medium_Lowland	PAN2423	80	3	2017-03-24	2017	fallow	0	0	0	?	0	0	0	1	1	1	1	?	?	?	?	0	1.35	-1.016	-0.845	-0.73	-0.521	-0.179	0.407	0.59	0.887	1.257	1.538	1.605	1.35	0	0	0	0	0	0
								Medium_Lowland	PAN2423	80	3	2017-03-25	2017	fallow	0	0	0	?	0	0	0	1	1	1	1	?	?	?	?	0	1.35	-0.959	-0.867	-0.719	-0.565	-0.22	0.172	0.423	0.748	1.104	1.408	1.545	1.35	0	0	0	0	0	0
								Medium_Lowland	PAN2423	80	3	2017-03-26	2017	fallow	0	0	0	?	0	0.03	0	1	1	1	1	?	?	?	?	0	1.35	-0.92	-0.84	-0.722	-0.578	-0.264	0.015	0.26	0.601	0.954	1.271	1.463	1.35	0	0	0	0	0	0
								Medium_Lowland	PAN2423	80	3	2017-03-27	2017	fallow	0	0	0	?	0	0.01	0	1	1	1	1	?	?	?	?	0	1.35	-0.813	-0.776	-0.692	-0.569	-0.286	-0.135	0.156	0.468	0.808	1.132	1.364	1.35	0	0	0	0	0	0
								Medium_Lowland	PAN2423	80	3	2017-03-28	2017	fallow	0	0	0	?	0	0.01	0	1	1	1	1	?	?	?	?	0	1.35	-0.729	-0.714	-0.652	-0.548	-0.312	-0.137	0.039	0.339	0.667	0.993	1.253	1.35	0	0	0	0	0	0
								Medium_Lowland	PAN2423	80	3	2017-03-29	2017	fallow	0	0	0	?	0	0.03	0	1	1	1	1	?	?	?	?	0	1.35	-0.663	-0.659	-0.611	-0.526	-0.323	-0.141	-0.197	0.237	0.538	0.856	1.134	1.35	0	0	0	0	0	0
								Medium_Lowland	PAN2423	80	3	2017-03-30	2017	fallow	0	0	0	?	0	0.03	0	1	1	1	1	?	?	?	?	0	1.35	-0.611	-0.611	-0.574	-0.476	-0.323	-0.156	-0.177	0.107	0.409	0.722	1.01	1.35	0	0	0	0	0	0
								Medium_Lowland	PAN2423	80	3	2017-03-31	2017	fallow	0	0	0	?	0	0.01	0	1	1	1	1	?	?	?	?	0	1.236	-0.568	-0.571	-0.53	-0.449	-0.32	-0.167	0	0.022	0.293	0.593	0.885	1.236	0	0	0	0	0	0
								Medium_Lowland	PAN2423	80	3	2017-04-01	2017	fallow	0	0	0	?	0	0.02	0	1	1	1	1	?	?	?	?	0	1.094	-0.533	-0.532	-0.496	-0.428	-0.316	-0.166	-0.175	0.015	0.21	0.478	0.763	1.094	0	0	0	0	0	0
								Medium_Lowland	PAN2423	80	3	2017-04-02	2017	fallow	0	0	0	?	0	0.04	0	1	1	1	1	?	?	?	?	0	0.96	-0.501	-0.499	-0.469	-0.411	-0.311	-0.175	-0.167	0	0.147	0.379	0.648	0.96	0	0	0	0	0	0
								Medium_Lowland	PAN2423	80	3	2017-04-03	2017	fallow	0	0	0	?	0	0.15	0	1	1	1	1	?	?	?	?	0	0.835	-0.474	-0.472	-0.446	-0.395	-0.306	-0.182	-0.159	0	0.103	0.296	0.542	0.835	0	0	0	0	0	0
								Medium_Lowland	PAN2423	80	3	2017-04-04	2017	fallow	0	0	0	?	0	0.25	0	1	1	1	1	?	?	?	?	0	0.719	-0.452	-0.449	-0.426	-0.382	-0.302	-0.188	-0.153	0	0.072	0.229	0.448	0.719	0	0	0	0	0	0
								Medium_Lowland	PAN2423	80	3	2017-04-05	2017	fallow	0	0	0	?	0	0.28	0	1	1	1	1	?	?	?	?	0	0.613	-0.432	-0.43	-0.409	-0.37	-0.297	-0.192	-0.147	0	0.05	0.175	0.366	0.613	0	0	0	0	0	0
								Medium_Lowland	PAN2423	80	3	2017-04-06	2017	fallow	0	0	0	?	0	0.37	0	1	1	1	1	?	?	?	?	0	0.518	-0.415	-0.413	-0.394	-0.359	-0.293	-0.194	-0.142	0	0.035	0.133	0.296	0.518	0	0	0	0	0	0
								Medium_Lowland	PAN2423	80	3	2017-04-07	2017	fallow	0	0	0	?	0	0.2	0	1	1	1	1	?	?	?	?	0	0.434	-0.4	-0.398	-0.381	-0.35	-0.289	-0.196	-0.137	0	0.025	0.101	0.238	0.434	0	0	0	0	0	0
								Medium_Lowland	PAN2423	80	3	2017-04-08	2017	fallow	0	0	0	?	0	0.63	0	1	1	1	1	?	?	?	?	0	0.36	-0.386	-0.384	-0.369	-0.341	-0.285	-0.198	-0.133	0	0.017	0.076	0.189	0.36	0	0	0	0	0	0
								Medium_Lowland	PAN2423	80	3	2017-04-09	2017	fallow	0	0	0	?	0	0.94	0	1	1	1	1	?	?	?	?	0	0.297	-0.374	-0.372	-0.359	-0.333	-0.282	-0.198	-0.129	0	0.012	0.057	0.149	0.297	0	0	0	0	0	0
								Medium_Lowland	PAN2423	80	3	2017-04-10	2017	fallow	0	0	0	?	0	0.11	0	1	1	1	1	?	?	?	?	0	0.243	-0.363	-0.361	-0.349	-0.326	-0.278	-0.198	-0.126	0	0.008	0.042	0.117	0.243	0	0	0	0	0	0
								Medium_Lowland	PAN2423	80	3	2017-04-11	2017	fallow	0	0	0	?	0	0.02	0	1	1	1	1	?	?	?	?	0	0.198	-0.353	-0.351	-0.34	-0.319	-0.274	-0.198	-0.122	0	0.006	0.031	0.091	0.198	0	0	0	0	0	0
								Medium_Lowland	PAN2423	80	3	2017-04-12	2017	fallow	0	0	0	?	0	0	0	1	1	1	1	?	?	?	?	0	0.16	-0.343	-0.342	-0.332	-0.313	-0.271	-0.198	-0.119	0	0.004	0.023	0.071	0.16	0	0	0	0	0	0
								Medium_Lowland	PAN2423	80	3	2017-04-13	2017	fallow	0	0	0	?	0	0	0	1	1	1	1	?	?	?	?	0	0.128	-0.335	-0.334	-0.325	-0.307	-0.268	-0.197	-0.117	0	0.003	0.017	0.055	0.128	0	0	0	0	0	0
								Medium_Lowland	PAN2423	80	3	2017-04-14	2017	fallow	0	0	0	?	0	0	0	1	1	1	1	?	?	?	?	0	0.102	-0.327	-0.326	-0.318	-0.301	-0.264	-0.196	-0.114	-0.004	0.002	0.013	0.042	0.102	0	0	0	0	0	0
								Medium_Lowland	PAN2423	80	3	2017-04-15	2017	fallow	0	0	0	?	0	0	0	1	1	1	1	?	?	?	?	0	0.081	-0.319	-0.319	-0.311	-0.296	-0.261	-0.194	-0.112	-0.007	0	0.009	0.032	0.081	0	0	0	0	0	0
								Medium_Lowland	PAN2423	80	3	2017-04-16	2017	fallow	0	0	0	?	0	0.18	0	1	1	1	1	?	?	?	?	0	0.064	-0.312	-0.312	-0.305	-0.291	-0.258	-0.193	-0.11	-0.011	0	0.006	0.024	0.064	0	0	0	0	0	0
								Medium_Lowland	PAN2423	80	3	2017-04-17	2017	fallow	0	0	0	?	0	0.26	0	1	1	1	1	?	?	?	?	0	0.05	-0.306	-0.305	-0.299	-0.286	-0.254	-0.191	-0.108	-0.014	0	0.004	0.018	0.05	0	0	0	0	0	0
								Medium_Lowland	PAN2423	80	3	2017-04-18	2017	fallow	0	0	0	?	0	0.35	0	1	1	1	1	?	?	?	?	0	0.039	-0.3	-0.299	-0.294	-0.281	-0.251	-0.19	-0.107	-0.016	0	0.003	0.014	0.039	0	0	0	0	0	0
								Medium_Lowland	PAN2423	80	3	2017-04-19	2017	fallow	0	0	0	?	0	3.67	0	1	1	1	1	?	?	?	?	0	0.031	0.89	0.417	0.118	-0.11	-0.231	-0.187	-0.106	-0.019	0	0.002	0.01	0.031	0	0	0	0	0	0
								Medium_Lowland	PAN2423	80	3	2017-04-20	2017	fallow	0	0	0	?	0	3.43	0	1	1	1	1	?	?	?	?	0	0.024	0.788	0.52	0.25	0.069	-0.192	-0.184	-0.104	-0.021	0	0.001	0.008	0.024	0	0	0	0	0	0
								Medium_Lowland	PAN2423	80	3	2017-04-21	2017	fallow	0	0	0	?	0	2.95	0	1	1	1	1	?	?	?	?	0	0.018	0.484	0.39	0.253	0.134	-0.149	-0.178	-0.103	-0.023	0	0.001	0.006	0.018	0	0	0	0	0	0
								Medium_Lowland	PAN2423	80	3	2017-04-22	2017	fallow	0	0	0	?	0	6.31	0	1	1	1	1	?	?	?	?	0	0.014	3.836	4.008	1.56	1.072	0.059	-0.163	-0.102	-0.024	0	0.001	0.004	0.014	0	0	0	0	0	0
								Medium_Lowland	PAN2423	80	3	2017-04-23	2017	fallow	0	0	0	?	0	6.16	0	1	1	1	1	?	?	?	?	0	0.011	3.69	3.69	3.69	1.419	0.396	-0.132	-0.1	-0.026	0	0.001	0.003	0.011	0	0	0	0	0	0
								Medium_Lowland	PAN2423	80	3	2017-04-24	2017	fallow	0	0	0	?	0	2.71	0	1	1	1	1	?	?	?	?	0	0.008	0.35	0.57	0.855	1.14	0.803	-0.077	-0.096	-0.027	0	0	0.002	0.008	0	0	0	0	0	0
								Medium_Lowland	PAN2423	80	3	2017-04-25	2017	fallow	0	0	0	?	0	0.72	0	1	1	1	1	?	?	?	?	0	0.006	-0.564	-1.052	0.713	1.049	0.85	-0.015	-0.092	-0.028	0	0	0.002	0.006	0	0	0	0	0	0
								Medium_Lowland	PAN2423	80	3	2017-04-26	2017	fallow	0	0	0	?	0	0.16	0	1	1	1	1	?	?	?	?	0	0.005	-0.842	-0.505	-0.695	0.524	0.332	0.049	-0.086	-0.029	0	0	0.001	0.005	0	0	0	0	0	0
								Medium_Lowland	PAN2423	80	3	2017-04-27	2017	fallow	0	0	0	?	0	0.28	0	1	1	1	1	?	?	?	?	0	0.004	-0.609	-0.643	-0.368	-0.392	0.166	0.094	-0.079	-0.03	0	0	0.001	0.004	0	0	0	0	0	0
								Medium_Lowland	PAN2423	80	3	2017-04-28	2017	fallow	0	0	0	?	0	0.8	0	1	1	1	1	?	?	?	?	0	0.003	-0.618	-0.518	-0.464	-0.331	-0.087	0.055	-0.074	-0.03	0	0	0.001	0.003	0	0	0	0	0	0
								Medium_Lowland	PAN2423	80	3	2017-04-29	2017	fallow	0	0	0	?	0	0.18	0	1	1	1	1	?	?	?	?	0	0.002	-0.546	-0.513	-0.435	-0.336	-0.14	-0.035	-0.071	-0.03	0	0	0	0.002	0	0	0	0	0	0
								Medium_Lowland	PAN2423	80	3	2017-04-30	2017	fallow	0	0	0	?	0	2.06	0	1	1	1	1	?	?	?	?	0	0.002	-0.407	-0.418	-0.383	-0.314	-0.167	-0.047	-0.069	-0.031	0	0	0	0.002	0	0	0	0	0	0
								Medium_Lowland	PAN2423	80	3	2017-05-01	2017	fallow	0	0	0	?	0	12.34	0	1	1	1	1	?	?	?	?	0	0.001	9.527	9.372	7.07	4.342	1.764	0.63	-0.048	-0.03	0	0	0	0.001	0	0	0	0	0	0
								Medium_Lowland	PAN2423	80	3	2017-05-02	2017	fallow	0	0	0	?	0	1.85	0	1	1	1	1	?	?	?	?	0	0.001	-0.327	0.26	0.855	1.14	1.452	0.945	0.26	-0.02	0	0	0	0.001	0	0	0	0	0	0
								Medium_Lowland	PAN2423	80	3	2017-05-03	2017	fallow	0	0	0	?	0	0.81	0	1	1	1	1	?	?	?	?	0	0.001	-0.814	-1.36	0.557	1.14	1.296	1.085	0.59	0	0	0	0	0.001	0	0	0	0	0	0
								Medium_Lowland	PAN2423	80	3	2017-05-04	2017	fallow	0	0	0	?	0	0.09	0	1	1	1	1	?	?	?	?	0	0	-1.083	-0.65	-1.121	0.706	1.001	1.052	0.775	0.028	0	0	0	0	0	0	0	0	0	0
								Medium_Lowland	PAN2423	80	3	2017-05-05	2017	fallow	0	0	0	?	0	0.21	0	1	1	1	1	?	?	?	?	0	0	-0.939	-1.011	-0.578	-0.812	0.501	0.831	0.797	0.056	0	0	0	0	0	0	0	0	0	0
								Medium_Lowland	PAN2423	80	3	2017-05-06	2017	fallow	0	0	0	?	0	0.71	0	1	1	1	1	?	?	?	?	0	0	-0.963	-0.809	-0.81	-0.579	-0.279	0.499	0.678	0.08	0	0	0	0	0	0	0	0	0	0
								Medium_Lowland	PAN2423	80	3	2017-05-07	2017	fallow	0	0	0	?	0	0.47	0	1	1	1	1	?	?	?	?	0	0	-0.843	-0.83	-0.722	-0.596	-0.277	0.187	0.482	0.196	0	0	0	0	0	0	0	0	0	0
								Medium_Lowland	PAN2423	80	3	2017-05-08	2017	fallow	0	0	0	?	0	0.83	0	1	1	1	1	?	?	?	?	0	0.001	-0.773	-0.753	-0.685	-0.569	-0.295	0.002	0.29	0.138	0.025	0.007	0.002	0.001	0	0	0	0	0	0
								Medium_Lowland	PAN2423	80	3	2017-05-09	2017	fallow	0	0	0	?	0	1.93	0	1	1	1	1	?	?	?	?	0	0.003	-0.611	-0.641	-0.61	-0.52	-0.295	-0.141	0.174	0.149	0.062	0.024	0.009	0.003	0	0	0	0	0	0
								Medium_Lowland	PAN2423	80	3	2017-05-10	2017	fallow	0	0	0	?	0	4.66	0	1	1	1	1	?	?	?	?	0	0.008	1.59	1.032	0.367	0.178	-0.179	-0.132	0.048	0.118	0.079	0.04	0.018	0.008	0	0	0	0	0	0
								Medium_Lowland	PAN2423	80	3	2017-05-11	2017	fallow	0	0	0	?	0	4.72	0	1	1	1	1	?	?	?	?	0	0.014	2.25	2.25	0.855	0.559	0.01	-0.115	-0.175	0.083	0.08	0.052	0.028	0.014	0	0	0	0	0	0
								Medium_Lowland	PAN2423	80	3	2017-05-12	2017	fallow	0	0	0	?	0	6.26	0	1	1	1	1	?	?	?	?	0	0.021	3.79	3.79	3.17	1.14	0.369	0	0	0.006	0.058	0.054	0.036	0.021	0	0	0	0	0	0
								Medium_Lowland	PAN2423	80	3	2017-05-13	2017	fallow	0	0	0	?	0	3.8	0	1	1	1	1	?	?	?	?	0	0.027	1.33	1.33	1.33	1.14	0.695	0.278	0.111	0.037	0.052	0.053	0.041	0.027	0	0	0	0	0	0
								Medium_Lowland	PAN2423	80	3	2017-05-14	2017	fallow	0	0	0	?	0	5.26	0	1	1	1	1	?	?	?	?	0	0.033	2.79	2.79	2.79	2.47	1.582	0.8	0.387	0.142	0.079	0.061	0.047	0.033	0	0	0	0	0	0
								Medium_Lowland	PAN2423	80	3	2017-05-15	2017	fallow	0	0	0	?	0	3.49	0	1	1	1	1	?	?	?	?	0	0.041	1.02	1.02	1.02	1.14	1.361	1.024	0.642	0.292	0.143	0.085	0.059	0.041	0	0	0	0	0	0
								Medium_Lowland	PAN2423	80	3	2017-05-16	2017	fallow	0	0	0	?	0	3.99	0	1	1	1	1	?	?	?	?	0	0.052	1.52	1.52	1.52	1.4	1.381	1.167	0.852	0.46	0.238	0.131	0.08	0.052	0	0	0	0	0	0
								Medium_Lowland	PAN2423	80	3	2017-05-17	2017	fallow	0	0	0	?	0	6.98	0	1	1	1	1	?	?	?	?	0	0.072	4.51	4.51	4.51	4.51	2.5	1.7	1.191	0.679	0.37	0.203	0.117	0.072	0	0	0	0	0	0
								Medium_Lowland	PAN2423	80	3	2017-05-18	2017	fallow	0	0	0	?	0	6.53	0	1	1	1	1	?	?	?	?	0	0.102	4.06	4.06	4.06	4.06	2.5	2.02	1.523	0.932	0.539	0.304	0.173	0.102	0	0	0	0	0	0
								Medium_Lowland	PAN2423	80	3	2017-05-19	2017	fallow	0	0	0	?	0	6.69	0	1	1	1	1	?	?	?	?	0	0.148	4.22	4.22	4.22	4.22	4.171	2.88	2.066	1.272	0.759	0.44	0.253	0.148	0	0	0	0	0	0.1
								Medium_Lowland	PAN2423	80	3	2017-05-20	2017	fallow	0	0	0	?	0	3.91	0	1	1	1	1	?	?	?	?	0	0.211	1.44	1.44	1.44	1.44	2.5	2.728	2.331	1.59	1.008	0.611	0.36	0.211	0	0	0	0	0	0
								Medium_Lowland	PAN2423	80	3	2017-05-21	2017	fallow	0	0	0	?	0	1.62	0	1	1	1	1	?	?	?	?	0	0.296	-0.518	0.145	0.855	1.14	2.5	2.637	2.453	1.849	1.26	0.806	0.494	0.296	0	0	0	0	0	0
								Medium_Lowland	PAN2423	80	3	2017-05-22	2017	fallow	0	0	0	?	0	0.39	0	1	1	1	1	?	?	?	?	0	0.402	-0.875	-1.42	0.5	1.14	1.86	2.326	2.402	2.015	1.487	1.01	0.649	0.402	0	0	0	0	0	0
								Medium_Lowland	PAN2423	80	3	2017-05-23	2017	fallow	0	0	0	?	0	2.48	0	1	1	1	1	?	?	?	?	0	0.526	-0.423	-0.254	-0.949	0.677	1.269	1.903	2.203	2.071	1.662	1.206	0.816	0.526	0	0	0	0	0	0
								Medium_Lowland	PAN2423	80	3	2017-05-24	2017	fallow	0	0	0	?	0	0.43	0	1	1	1	1	?	?	?	?	0	0.663	-1	-0.98	-0.56	-0.735	0.634	1.396	1.88	2.014	1.768	1.374	0.983	0.663	0	0	0	0	0	0
								Medium_Lowland	PAN2423	80	3	2017-05-25	2017	fallow	0	0	0	?	0	0.15	0	1	1	1	1	?	?	?	?	0	0.806	-0.994	-0.82	-0.784	-0.56	-0.311	0.837	1.463	1.849	1.792	1.499	1.138	0.806	0	0	0	0	0	0
								Medium_Lowland	PAN2423	80	3	2017-05-26	2017	fallow	0	0	0	?	0	7.11	0	1	1	1	1	?	?	?	?	0	0.944	3.989	3.507	1.116	0.398	0.024	0.388	1.033	1.604	1.735	1.57	1.268	0.944	0	0	0	0	0	0
								Medium_Lowland	PAN2423	80	3	2017-05-27	2017	fallow	0	0	0	?	0	10.11	0	1	1	1	1	?	?	?	?	0	1.071	7.64	7.64	7.64	5.758	2.5	1.233	1.113	1.457	1.652	1.595	1.366	1.071	0	0	0	0	0	0
								Medium_Lowland	PAN2423	80	3	2017-05-28	2017	fallow	0	0	0	?	0	1.77	0	1	1	1	1	?	?	?	?	0	1.18	-0.393	0.22	0.855	1.14	2.211	1.624	1.317	1.415	1.581	1.591	1.433	1.18	0	0	0	0	0	0
								Medium_Lowland	PAN2423	80	3	2017-05-29	2017	fallow	0	0	0	?	0	4.33	0	1	1	1	1	?	?	?	?	0	1.268	1.553	0.94	0.855	1.14	1.675	1.645	1.448	1.425	1.534	1.574	1.475	1.268	0	0	0	0	0	0
								Medium_Lowland	PAN2423	80	3	2017-05-30	2017	fallow	0	0	0	?	0	3.48	0	1	1	1	1	?	?	?	?	0	1.337	1.01	1.01	0.855	1.14	1.408	1.55	1.489	1.444	1.507	1.554	1.499	1.337	0	0	0	0	0	0
								Medium_Lowland	PAN2423	80	3	2017-05-31	2017	fallow	0	0	0	?	0	5.58	0	1	1	1	1	?	?	?	?	0	1.35	3.11	3.11	2.715	1.86	1.634	1.583	1.527	1.469	1.495	1.536	1.51	1.35	0	0	0	0	0	0
								Medium_Lowland	PAN2423	80	3	2017-06-01	2017	fallow	0	0	0	?	0	10.91	0	1	1	1	1	?	?	?	?	0	1.35	8.44	8.44	8.44	8.44	5.074	2.98	2.108	1.661	1.545	1.539	1.519	1.35	0	0	0	0	0	0
								Medium_Lowland	PAN2423	80	3	2017-06-02	2017	fallow	0	0	0	?	0	8.11	0	1	1	1	1	?	?	?	?	0	1.35	5.64	5.64	5.64	5.64	5.64	4.044	2.882	2.027	1.69	1.584	1.538	1.35	0	0	0	0	0	0
								Medium_Lowland	PAN2423	80	3	2017-06-03	2017	fallow	0	0	0	?	0	5.12	0	1	1	1	1	?	?	?	?	0	1.35	2.65	2.65	2.65	2.65	2.65	3.486	3.124	2.356	1.89	1.676	1.579	1.35	0	0	0	0	0	0
								Medium_Lowland	PAN2423	80	3	2017-06-04	2017	fallow	0	0	0	?	0	1.99	0	1	1	1	1	?	?	?	?	0	1.35	-0.21	0.33	0.855	1.14	2.5	3.092	3.111	2.583	2.097	1.802	1.646	1.35	0	0	0	0	0	0
								Medium_Lowland	PAN2423	80	3	2017-06-05	2017	fallow	0	0	0	?	0	1.54	0	1	1	1	1	?	?	?	?	0	1.399	-0.62	-1.23	0.593	1.14	2.39	2.811	2.991	2.705	2.28	1.945	1.736	1.399	0	0	0	0	0	0
								Medium_Lowland	PAN2423	80	3	2017-06-06	2017	fallow	0	0	0	?	0	3.37	0	1	1	1	1	?	?	?	?	0	1.841	0.38	0.228	-0.409	0.724	1.557	2.309	2.718	2.709	2.409	2.084	1.841	1.841	0	0	0	0	0	0
								Medium_Lowland	PAN2423	80	3	2017-06-07	2017	fallow	0	0	0	?	0	1.05	0	1	1	1	1	?	?	?	?	0	1.948	-0.98	0.001	0.001	0.158	0.857	1.729	2.322	2.593	2.464	2.198	1.948	1.948	0	0	0	0	0	0
								Medium_Lowland	PAN2423	80	3	2017-06-08	2017	fallow	0	0	0	?	0	1.26	0	1	1	1	1	?	?	?	?	0	2.045	-0.653	-1.144	0	0.079	0.468	1.224	1.883	2.38	2.439	2.27	2.045	2.045	0	0	0	0	0	0
								Medium_Lowland	PAN2423	80	3	2017-06-09	2017	fallow	0	0	0	?	0	3.1	0	1	1	1	1	?	?	?	?	0	2.118	0.634	0.38	-0.441	0.039	0.254	0.836	1.464	2.105	2.339	2.291	2.118	2.118	0	0	0	0	0	0
								Medium_Lowland	PAN2423	80	3	2017-06-10	2017	fallow	0	0	0	?	0	2.49	0	1	1	1	1	?	?	?	?	0	2.16	0.196	0.565	0.323	-0.053	0.127	0.552	1.1	1.804	2.178	2.257	2.16	2.16	0	0	0	0	0	0
								Medium_Lowland	PAN2423	80	3	2017-06-11	2017	fallow	0	0	0	?	0	5.53	0	1	1	1	1	?	?	?	?	0	2.164	2.868	2.485	0.855	0.414	0.244	0.429	0.831	1.512	1.978	2.173	2.164	2.164	0	0	0	0	0	0
								Medium_Lowland	PAN2423	80	3	2017-06-12	2017	fallow	0	0	0	?	0	10.83	0	1	1	1	1	?	?	?	?	0	2.133	8.36	8.36	8.199	6.334	2.5	1.257	1.002	1.359	1.793	2.059	2.133	2.133	0	0	0	0	0	0
								Medium_Lowland	PAN2423	80	3	2017-06-13	2017	fallow	0	0	0	?	0	1.25	0	1	1	1	1	?	?	?	?	0	2.074	-0.813	-1.127	0.855	1.14	2.5	1.754	1.303	1.342	1.657	1.939	2.074	2.074	0	0	0	0	0	0
								Medium_Lowland	PAN2423	80	3	2017-06-14	2017	fallow	0	0	0	?	0	0.64	0	1	1	1	1	?	?	?	?	0	2.001	-1.201	-0.721	-0.983	0.997	1.858	1.796	1.5	1.389	1.577	1.83	2.001	2.001	0	0	0	0	0	0
								Medium_Lowland	PAN2423	80	3	2017-06-15	2017	fallow	0	0	0	?	0	3.05	0	1	1	1	1	?	?	?	?	0	1.923	0.331	0.555	0.272	0.144	1.001	1.478	1.491	1.42	1.53	1.74	1.923	1.923	0	0	0	0	0	0
								Medium_Lowland	PAN2423	80	3	2017-06-16	2017	fallow	0	0	0	?	0	8.46	0	1	1	1	1	?	?	?	?	0	1.847	5.795	5.405	3.967	1.831	1.416	1.453	1.476	1.437	1.502	1.669	1.847	1.847	0	0	0	0	0	0
								Medium_Lowland	PAN2423	80	3	2017-06-17	2017	fallow	0	0	0	?	0	2.74	0	1	1	1	1	?	?	?	?	0	1.776	0.37	0.57	0.855	1.14	1.278	1.383	1.439	1.437	1.483	1.613	1.776	1.776	0	0	0	0	0	0
								Medium_Lowland	PAN2423	80	3	2017-06-18	2017	fallow	0	0	0	?	0	2.45	0	1	1	1	1	?	?	?	?	0	1.714	0.123	0.41	0.855	1.14	1.209	1.313	1.389	1.423	1.465	1.568	1.714	1.714	0	0	0	0	0	0
								Medium_Lowland	PAN2423	80	3	2017-06-19	2017	fallow	0	0	0	?	0	44.96	0	1	1	1	1	?	?	?	?	0	1.694	27.608	27.121	26.391	25.821	22.03	12	5.633	2.686	1.831	1.647	1.694	1.694	0	0	0	0	0	0.1
								Medium_Lowland	PAN2423	80	3	2017-06-20	2017	fallow	0	0	0	?	0	34.33	0	1	1	1	1	?	?	?	?	0	1.754	12	12	12	12	12	12	6.96	3.968	2.472	1.895	1.754	1.754	0	0	0	0	0	0
								Medium_Lowland	PAN2423	80	3	2017-06-21	2017	fallow	0	0	0	?	0	8.34	0	1	1	1	1	?	?	?	?	0	1.891	5.87	5.87	5.87	5.87	5.87	5.87	6.96	4.05	2.945	2.21	1.891	1.891	0	0	0	0	0	0
								Medium_Lowland	PAN2423	80	3	2017-06-22	2017	fallow	0	0	0	?	0	3.82	0	1	1	1	1	?	?	?	?	0	2.123	1.35	1.35	1.35	1.35	2.5	4.8	6.88	5.549	3.726	2.665	2.123	2.123	0	0	0	0	0	0
								Medium_Lowland	PAN2423	80	3	2017-06-23	2017	fallow	0	0	0	?	0	19.09	0	1	1	1	1	?	?	?	?	0	2.41	15.45	15.45	15.45	15.45	14.3	12	6.96	6.96	4.05	3.08	2.41	2.41	0	0	0	0	0	0
								Medium_Lowland	PAN2423	80	3	2017-06-24	2017	fallow	0	0	0	?	0	15.62	0	1	1	1	1	?	?	?	?	0	2.884	10.04	10.04	10.04	10.04	10.04	10.04	8	8	6.105	3.988	2.884	2.884	0	0	0	0	0	0
								Medium_Lowland	PAN2423	80	3	2017-06-25	2017	fallow	0	0	0	?	0	4.03	0	1	1	1	1	?	?	?	?	0	3.233	1.56	1.56	1.56	1.56	2.5	4.8	6.96	6.96	6.96	4.05	3.233	3.233	0	0	0	0	0	0
								Medium_Lowland	PAN2423	80	3	2017-06-26	2017	fallow	0	0	0	?	0	8.25	0	1	1	1	1	?	?	?	?	0	3.966	5.78	5.78	5.78	5.78	4.84	4.8	6.96	6.96	6.96	5.675	3.966	3.966	0	0	0	0	0	0
								Medium_Lowland	PAN2423	80	3	2017-06-27	2017	fallow	0	0	0	?	0	10.79	0	1	1	1	1	?	?	?	?	0	4.05	8.32	8.32	8.32	8.32	8.32	6.06	6.96	6.96	6.96	6.96	4.05	4.05	0	0	0	0	0	0
								Medium_Lowland	PAN2423	80	3	2017-06-28	2017	fallow	0	0	0	?	0	4.89	0	1	1	1	1	?	?	?	?	0	5.456	2.42	2.42	2.42	2.42	2.5	4.8	6.792	6.792	6.792	6.792	5.456	5.456	0	0	0	0	0	0
								Medium_Lowland	PAN2423	80	3	2017-06-29	2017	fallow	0	0	0	?	0	3.49	0	1	1	1	1	?	?	?	?	0	5.995	1.02	1.02	1.02	1.14	2.5	4.8	5.995	5.995	5.995	5.995	5.995	5.995	0	0	0	0	0	0
								Medium_Lowland	PAN2423	80	3	2017-06-30	2017	fallow	0	0	0	?	0	7.65	0	1	1	1	1	?	?	?	?	0	5.36	5.18	5.18	5.18	5.06	3.62	4.408	5.36	5.36	5.36	5.36	5.36	5.36	0	0	0	0	0	0
								Medium_Lowland	PAN2423	80	3	2017-07-01	2017	fallow	0	0	0	?	0	41.21	0	1	1	1	1	?	?	?	?	0	6.96	17.388	17.388	17.388	17.388	17.388	12	6.96	6.96	6.96	6.96	6.96	6.96	17.497	0	0	0	0	0
								Medium_Lowland	PAN2423	80	3	2017-07-02	2017	fallow	0	0	0	?	0	12.03	0	1	1	1	1	?	?	?	?	0	7.68	12.299	12	12	12	12	12	7.68	7.68	7.68	7.68	7.68	7.68	13.035	0	0	0	0	0
								Medium_Lowland	PAN2423	80	3	2017-07-03	2017	rice	0	4.3	0	?	0	25.88	0.015	1	1	1	1	?	?	?	?	2.6	8	7.701	8	8	8	8	8	8	8	8	8	8	8	25.713	0	0	0	0	0
								Medium_Lowland	PAN2423	80	3	2017-07-04	2017	rice	0	9.9	0	?	0	11.52	0.031	1	1	1	1	?	?	?	?	5.9	8	8	8	8	8	8	8	8	8	8	8	8	8	23.832	0	0	0	0	0
								Medium_Lowland	PAN2423	80	3	2017-07-05	2017	rice	0	13.9	0	?	0	8.3	0.045	1	1	1	1	?	?	?	?	8.3	8	8.997	8	8	8	8	8	8	8	8	8	8	8	20.444	0	0	0	0	0
								Medium_Lowland	PAN2423	80	3	2017-07-06	2017	rice	0	17.2	0	?	0	12.33	0.06	1	1	1	1	?	?	?	?	10.3	8	8.52	8	8	8	8	8	8	8	8	8	8	8	22.859	0	0	0	0	0
								Medium_Lowland	PAN2423	80	3	2017-07-07	2017	rice	0	28.3	0	?	0	14.44	0.075	1	1	1	1	?	?	?	?	17	8	6.483	8	8	8	8	8	8	8	8	8	8	8	25.937	0	0	0	0	0
								Medium_Lowland	PAN2423	80	3	2017-07-08	2017	rice	0	43.9	0	?	0	13.97	0.09	1	1	1	1	?	?	?	?	26.3	8	8	8	8	8	8	8	8	8	8	8	8	8	26.361	0	0	0	0	0
								Medium_Lowland	PAN2423	80	3	2017-07-09	2017	rice	0	64.9	0	?	0	6.38	0.105	1	1	1	1	?	?	?	?	38.9	8	8	8	8	8	8	8	8	8	8	8	8	8	18.812	0	0	0	0	0
								Medium_Lowland	PAN2423	80	3	2017-07-10	2017	rice	0	87.2	0	?	0	14.34	0.12	1	1	1	1	?	?	?	?	52.3	8	8.184	8	8	8	8	8	8	8	8	8	8	8	20.488	0	0	0	0	0
								Medium_Lowland	PAN2423	80	3	2017-07-11	2017	rice	0	112	0	?	0	33.64	0.136	1	1	1	1	?	?	?	?	67.2	8	8.446	8	8	8	8	8	8	8	8	8	8	8	42.35	0	0	0	0	0
								Medium_Lowland	PAN2423	80	3	2017-07-12	2017	rice	0	136.5	0	?	0	37.98	0.151	1	1	1	1	?	?	?	?	81.9	8	8.604	8	8	8	8	8	8	8	8	8	8	8	69.765	0	0	0	0	0
								Medium_Lowland	PAN2423	80	3	2017-07-13	2017	rice	0	183.2	0	?	0	12.62	0.166	1	1	1	1	?	?	?	?	109.9	8	7.234	8	8	8	8	8	8	8	8	8	8	8	71.637	0	0	0	0	0
								Medium_Lowland	PAN2423	80	3	2017-07-14	2017	rice	0	242.7	0	?	0	6.84	0.181	1	1	1	1	?	?	?	?	145.6	8	8.022	8	8	8	8	8	8	8	8	8	8	8	66.974	0	0	0	0	0
								Medium_Lowland	PAN2423	80	3	2017-07-15	2017	rice	0	294.3	0	?	0	2.87	0.196	1	1	1	1	?	?	?	?	176.6	8	7.85	8	8	8	8	8	8	8	8	8	8	8	58.149	0	0	0	0	0
								Medium_Lowland	PAN2423	80	3	2017-07-16	2017	rice	0	363.5	0	?	0	5.25	0.211	1	1	1	1	?	?	?	?	218.1	8	7.66	8	8	8	8	8	8	8	8	8	8	8	50.849	0	0	0	0	0
								Medium_Lowland	PAN2423	80	3	2017-07-17	2017	rice	0	421.7	0	?	0	8.66	0.226	1	1	1	1	?	?	?	?	253	8	8.29	8	8	8	8	8	8	8	8	8	8	8	47.004	0	0	0	0	0
								Medium_Lowland	PAN2423	80	3	2017-07-18	2017	rice	0	487.8	0	?	0	8.75	0.241	1	1	1	1	?	?	?	?	292.7	8	7.851	8	8	8	8	8	8	8	8	8	8	8	43.462	0	0	0	0	0
								Medium_Lowland	PAN2423	80	3	2017-07-19	2017	rice	0	531.7	0	?	0	26.22	0.256	1	1	1	1	?	?	?	?	319	8	9.198	8	8	8	8	8	8	8	8	8	8	8	58.548	0	0	0	0	0
								Medium_Lowland	PAN2423	80	3	2017-07-20	2017	rice	0	541.1	0	?	0	69.5	0.272	1	1	1	1	?	?	?	?	324.7	8	8.306	8	8	8	8	8	8	8	8	8	8	8	118.959	0	0	0	0	0
								Medium_Lowland	PAN2423	80	3	2017-07-21	2017	rice	0	560.1	0	?	0	136.76	0.287	1	1	1	1	?	?	?	?	336.1	8	8	8	8	8	8	8	8	8	8	8	8	8	247.149	0	0	0	0	0
								Medium_Lowland	PAN2423	80	3	2017-07-22	2017	rice	0	593.9	0	?	0	45.53	0.302	1	1	1	1	?	?	?	?	356.3	8	7.996	8	8	8	8	8	8	8	8	8	8	8	283.748	0	0	0	0	0
								Medium_Lowland	PAN2423	80	3	2017-07-23	2017	rice	0	39.1	0	?	0	55.68	0.317	1	1	1	1	?	?	?	?	23.5	8	8.004	8	8	8	8	8	8	8	8	8	8	8	299.797	0	0	0	0	0
								Medium_Lowland	PAN2423	80	3	2017-07-24	2017	rice	0	40.7	0	?	0	93.68	0.317	1	1	1	0.982	?	?	?	?	24.4	8	8	8	8	8	8	8	8	8	8	8	8	8	299.579	0	0	0	0	0
								Medium_Lowland	PAN2423	80	3	2017-07-25	2017	rice	0	44.5	0	?	0	20.9	0.317	1	1	1	0.96	?	?	?	?	26.7	8	7.729	8.02	8	8	8	8	8	8	8	8	8	8	299.125	0	0	0	0	0
								Medium_Lowland	PAN2423	80	3	2017-07-26	2017	rice	0	49.6	0	?	0	17.21	0.317	1	1	1	0.965	?	?	?	?	29.8	8	7.728	8.049	8.012	8	8	8	8	8	8	8	8	8	298.78	0	0	0	0	0
								Medium_Lowland	PAN2423	80	3	2017-07-27	2017	rice	0	56.3	0	?	0	7.23	0.317	1	1	1	0.894	?	?	?	?	33.8	8	7.499	8.074	8.03	8	8	8	8	8	8	8	8	8	294.786	0	0	0	0	0
								Medium_Lowland	PAN2423	80	3	2017-07-28	2017	rice	0	63.9	0	?	0	8.24	0.317	1	1	1	0.875	?	?	?	?	38.3	8	7.843	8.122	8.061	8	8	8	8	8	8	8	8	8	290.592	0	0	0	0	0
								Medium_Lowland	PAN2423	80	3	2017-07-29	2017	rice	0	71.3	0	?	0	2.2	0.317	1	1	1	0.892	?	?	?	?	42.8	8	8.268	8.161	8.092	8	8	8	8	8	8	8	8	8	279.922	0	0	0	0	0
								Medium_Lowland	PAN2423	80	3	2017-07-30	2017	rice	0	79.2	0	?	0	5.03	0.317	1	1	1	0.926	?	?	?	?	47.5	8	8.53	8.161	8.101	8.02	8	8	8	8	8	8	8	8	272.676	0	0	0	0	0
								Medium_Lowland	PAN2423	80	3	2017-07-31	2017	rice	0	89.1	0	?	0	7.3	0.317	1	1	1	0.928	?	?	?	?	53.5	8	8.14	8.159	8.106	8.035	8	8	8	8	8	8	8	8	268.122	0	0	0	0	0
								Medium_Lowland	PAN2423	80	3	2017-08-01	2017	rice	0	102.8	0	?	0	3.17	0.332	1	1	1	0.917	?	?	?	?	61.7	8	8.011	8.21	8.147	8.063	8	8	8	8	8	8	8	8	258.935	0	0	0	0	0
								Medium_Lowland	PAN2423	80	3	2017-08-02	2017	rice	0	109.9	0	?	0	9.62	0.348	1	1	1	0.981	?	?	?	?	66	8	9.676	8.313	8.228	8.114	8	8	8	8	8	8	8	8	257.189	0	0	0	0	0
								Medium_Lowland	PAN2423	80	3	2017-08-03	2017	rice	0	127.3	0	?	0	15.58	0.363	1	1	1	0.962	?	?	?	?	76.4	8	7.39	8.131	8.098	8.055	8	8	8	8	8	8	8	8	262.354	0	0	0	0	0
								Medium_Lowland	PAN2423	80	3	2017-08-04	2017	rice	0	153.4	0	?	0	17.6	0.378	1	1	1	0.943	?	?	?	?	92	8	8.044	8.335	8.258	8.155	8	8	8	8	8	8	8	8	268.11	0	0	0	0	0
								Medium_Lowland	PAN2423	80	3	2017-08-05	2017	rice	0	180.7	0	?	0	13.64	0.394	1	1	1	0.969	?	?	?	?	108.4	8	9	8.536	8.421	8.268	8	8	8	8	8	8	8	8	269.713	0	0	0	0	0
								Medium_Lowland	PAN2423	80	3	2017-08-06	2017	rice	0	218.3	0	?	0	5.28	0.409	1	1	1	0.958	?	?	?	?	131	8	8.363	8.507	8.406	8.27	8	8	8	8	8	8	8	8	263.246	0	0	0	0	0
								Medium_Lowland	PAN2423	80	3	2017-08-07	2017	rice	0	257.1	0	?	0	7.78	0.426	1	1	1	0.983	?	?	?	?	154.2	8	9.214	8.724	8.588	8.407	8	8	8	8	8	8	8	8	259.216	0	0	0	0	0
								Medium_Lowland	PAN2423	80	3	2017-08-08	2017	rice	0	325.2	0	?	0	8.8	0.442	1	1	1	0.946	?	?	?	?	195.1	8	8.016	8.684	8.563	8.402	8	8	8	8	8	8	8	8	255.752	0	0	0	0	0
								Medium_Lowland	PAN2423	80	3	2017-08-09	2017	rice	0	411.6	0	?	0	6.4	0.459	1	1	1	0.946	?	?	?	?	247	8	9.564	9.453	9.211	8.888	8.081	8	8	8	8	8	8	8	248.014	0	0	0	0	0
								Medium_Lowland	PAN2423	80	3	2017-08-10	2017	rice	0	500.4	0	?	0	13.55	0.477	1	1	0.904	0.965	?	?	?	?	300.3	8	10.422	9.839	9.549	9.162	8.194	8	8	8	8	8	8	8	247.491	0	0	0	0	0
								Medium_Lowland	PAN2423	80	3	2017-08-11	2017	rice	0	583.4	0	?	0	15.24	0.494	1	1	0	0.988	?	?	?	?	350	8	10.309	9.677	9.426	9.09	8.252	8	8	8	8	8	8	8	249.897	0	0	0	0	0
								Medium_Lowland	PAN2423	80	3	2017-08-12	2017	rice	0	620.7	0	?	0	24.53	0.511	1	1	0	0.99	?	?	?	?	372.4	8	10.278	9.486	9.273	8.99	8.283	8	8	8	8	8	8	8	262.974	0	0	0	0	0
								Medium_Lowland	PAN2423	80	3	2017-08-13	2017	rice	0	693.2	0	?	0	11.34	0.528	1	1	0	0.989	?	?	?	?	415	8	8.278	8.652	8.563	8.445	8.148	8	8	8	8	8	8	8	264.036	0	0	0	0	0
								Medium_Lowland	PAN2423	80	3	2017-08-14	2017	rice	0	777.3	0	?	0	16.62	0.544	1	1	0	0.99	?	?	?	?	462.7	8	9.26	9.256	9.093	8.874	8.328	8	8	8	8	8	8	8	269.124	0	0	0	0	0
								Medium_Lowland	PAN2423	80	3	2017-08-15	2017	rice	0	905.2	0	?	0	12.43	0.561	1	1	0	0.966	?	?	?	?	532.6	8	8.904	9.495	9.308	9.059	8.436	8	8	8	8	8	8	8	268.878	0	0	0	0	0
								Medium_Lowland	PAN2423	80	3	2017-08-16	2017	rice	0	1016.4	0	?	0	7.56	0.578	1	1	0	0.988	?	?	?	?	591.1	8	11.513	10.749	10.419	9.98	8.88	8	8	8	8	8	8	8	262.194	0	0	0	0	0
								Medium_Lowland	PAN2423	80	3	2017-08-17	2017	rice	0	1169.9	0	?	0	9.52	0.595	1	1	0	0.968	?	?	?	?	668.8	8	9.837	10.228	9.971	9.628	8.771	8	8	8	8	8	8	8	258.034	0	0	0	0	0
								Medium_Lowland	PAN2423	80	3	2017-08-18	2017	rice	0	1317.3	0	?	0	4.88	0.612	1	1	0	0.985	?	?	?	?	740.5	8	12.53	11.799	11.377	10.814	9.407	8	8	8	8	8	8	8	247.386	0	0	0	0	0
								Medium_Lowland	PAN2423	80	3	2017-08-19	2017	rice	0	1478.5	0	?	0	9.93	0.628	1	1	0	0.986	?	?	?	?	815.6	8	11.494	11.25	10.902	10.438	9.277	8	8	8	8	8	8	8	242.942	0	0	0	0	0
								Medium_Lowland	PAN2423	80	3	2017-08-20	2017	rice	0	1663.5	0	?	0	12.68	0.645	1	1	0	0.98	?	?	?	?	898.1	8	11.72	11.639	11.262	10.761	9.506	8	8	8	8	8	8	8	240.672	0	0	0	0	0
								Medium_Lowland	PAN2423	80	3	2017-08-21	2017	rice	0	1852.7	0	?	0	5.99	0.662	1	1	0	0.988	?	?	?	?	978.6	8	12.927	12.428	11.986	11.395	9.919	8	8	8	8	8	8	8	230.89	0	0	0	0	0
								Medium_Lowland	PAN2423	80	3	2017-08-22	2017	rice	0	1960.3	0	?	0	5.03	0.682	1	1	0	0.992	?	?	?	?	1022.3	8	13.202	12.163	11.76	11.223	9.88	8	8	8	8	8	8	8	221.427	0	0	0	0	0
								Medium_Lowland	PAN2423	80	3	2017-08-23	2017	rice	0	2103	0	?	0	15.09	0.701	1	1	0	0.992	?	?	?	?	1076.8	8	9.856	9.911	9.732	9.493	8.896	8	8	8	8	8	8	8	225.096	0	0	0	0	0
								Medium_Lowland	PAN2423	80	3	2017-08-24	2017	rice	0	2331.3	0	?	0	7.3	0.721	1	1	0	0.987	?	?	?	?	1158.6	8	10.056	10.562	10.329	10.019	9.242	8	8	8	8	8	8	8	219.434	0	0	0	0	0
								Medium_Lowland	PAN2423	80	3	2017-08-25	2017	rice	0	2554	0	?	0	4.43	0.741	1	1	0	0.993	?	?	?	?	1233.1	8	13.514	12.988	12.548	11.961	10.494	8	8	8	8	8	8	8	207.84	0	0	0	0	0
								Medium_Lowland	PAN2423	80	3	2017-08-26	2017	rice	0	2776.1	0	?	0	4.91	0.761	1	1	0	0.993	?	?	?	?	1302.1	8	12.799	12.394	12.017	11.515	10.26	8	8	8	8	8	8	8	197.77	0	0	0	0	0
								Medium_Lowland	PAN2423	80	3	2017-08-27	2017	rice	0	2976.6	0	?	0	12.2	0.781	1	1	0	0.993	?	?	?	?	1359.5	8	12.426	11.983	11.651	11.208	10.102	8	8	8	8	8	8	8	195.822	0	0	0	0	0
								Medium_Lowland	PAN2423	80	3	2017-08-28	2017	rice	0	3174.5	0	?	0	18.94	0.801	1	1	0	0.993	?	?	?	?	1411.5	8	11.437	11.23	10.968	10.619	9.746	8	8	8	8	8	8	8	201.691	0	0	0	0	0
								Medium_Lowland	PAN2423	80	3	2017-08-29	2017	rice	0	3363.7	0	?	0	13.35	0.821	1	1	0	0.993	?	?	?	?	1456.6	8	11.398	11.17	10.913	10.57	9.713	8	8	8	8	8	8	8	202.125	0	0	0	0	0
								Medium_Lowland	PAN2423	80	3	2017-08-30	2017	rice	0	3608.5	0	?	0	5.19	0.841	1	1	0	0.993	?	?	?	?	1509.1	8	10.818	10.99	10.747	10.424	9.616	8	8	8	8	8	8	8	194.316	0	0	0	0	0
								Medium_Lowland	PAN2423	80	3	2017-08-31	2017	rice	0	3796.7	0	?	0	4.63	0.861	1	1	0	0.993	?	?	?	?	1544.9	8	13.051	12.434	12.075	11.595	10.397	8	8	8	8	8	8	8	184.429	0	0	0	0	0
								Medium_Lowland	PAN2423	80	3	2017-09-01	2017	rice	0	3970.6	0	?	0	18.59	0.881	1	1	0	0.993	?	?	?	?	1573.8	8	11.107	10.884	10.651	10.339	9.559	8	8	8	8	8	8	8	190.621	0	0	0	0	0
								Medium_Lowland	PAN2423	80	3	2017-09-02	2017	rice	0	4219.5	0	?	0	50.29	0.901	1	1	0	0.993	?	?	?	?	1609.2	8	10.424	10.613	10.401	10.119	9.412	8	8	8	8	8	8	8	228.543	0	0	0	0	0
								Medium_Lowland	PAN2423	80	3	2017-09-03	2017	rice	0	4482.1	0	?	0	4.99	0.92	1	1	0	0.993	?	?	?	?	1640.5	8	12.008	12.038	11.711	11.274	10.183	8	8	8	8	8	8	8	219.046	0	0	0	0	0
								Medium_Lowland	PAN2423	80	3	2017-09-04	2017	rice	0	4748.8	0	?	0	1.03	0.94	1	1	0	0.992	?	?	?	?	1666	8	13.341	13.13	12.714	12.159	10.773	8	8	8	8	8	8	8	204.094	0	0	0	0	0
								Medium_Lowland	PAN2423	80	3	2017-09-05	2017	rice	0	5007.7	0	?	0	1.56	0.96	1	1	0	0.993	?	?	?	?	1684.7	8	13.865	13.423	12.983	12.397	10.931	8	8	8	8	8	8	8	189.437	0	0	0	0	0
								Medium_Lowland	PAN2423	80	3	2017-09-06	2017	rice	0	5271.3	132.9	?	0	2.87	0.98	1	1	0	0.992	?	?	?	?	1697.4	8	12.867	12.775	12.388	11.872	10.581	8	8	8	8	8	8	8	176.772	0	0	0	0	0
								Medium_Lowland	PAN2423	80	3	2017-09-07	2017	rice	0	5529.2	275.2	?	0	1.53	1	1	1	0	0.993	?	?	?	?	1703.6	8	13.855	13.489	13.044	12.451	10.967	8	8	8	8	8	8	8	161.897	0	0	0	0	0
								Medium_Lowland	PAN2423	80	3	2017-09-08	2017	rice	0	5751.3	444.3	?	0	2.07	1.03	1	1	0	0.993	?	?	?	?	1703.6	8	13.645	13.177	12.757	12.197	10.798	8	8	8	8	8	8	8	148.157	0	0	0	0	0
								Medium_Lowland	PAN2423	80	3	2017-09-09	2017	rice	0	5958.6	618.1	?	0	7.01	1.06	1	1	0	0.993	?	?	?	?	1703.6	8	12.709	12.347	11.995	11.525	10.35	8	8	8	8	8	8	8	140.569	0	0	0	0	0
								Medium_Lowland	PAN2423	80	3	2017-09-10	2017	rice	0	6179.1	814.4	?	0	3.62	1.09	1	1	0	0.993	?	?	?	?	1703.6	8	11.735	11.784	11.477	11.068	10.045	8	8	8	8	8	8	8	130.074	0	0	0	0	0
								Medium_Lowland	PAN2423	80	3	2017-09-11	2017	rice	0	6384.5	1012.6	?	0	13.2	1.12	1	1	0	0.993	?	?	?	?	1703.6	8	13.233	12.837	12.445	11.922	10.615	8	8	8	8	8	8	8	127.901	0	0	0	0	0
								Medium_Lowland	PAN2423	80	3	2017-09-12	2017	rice	0	6583.4	1217.3	?	0	8.64	1.151	1	1	0	0.993	?	?	?	?	1703.6	8	12.443	12.245	11.901	11.442	10.294	8	8	8	8	8	8	8	121.911	0	0	0	0	0
								Medium_Lowland	PAN2423	80	3	2017-09-13	2017	rice	0	6778.6	1430.2	?	0	8.33	1.181	1	1	0	0.993	?	?	?	?	1703.6	8	12.563	12.349	11.997	11.526	10.351	8	8	8	8	8	8	8	115.446	0	0	0	0	0
								Medium_Lowland	PAN2423	80	3	2017-09-14	2017	rice	0	6967.7	1647.8	?	0	3.12	1.21	1	1	0	0.993	?	?	?	?	1703.6	8	12.55	12.41	12.052	11.576	10.384	8	8	8	8	8	8	8	103.586	0	0	0	0	0
								Medium_Lowland	PAN2423	80	3	2017-09-15	2017	rice	0	7148.8	1862.6	?	0	2.87	1.241	0.954	0.996	0	0.993	?	?	?	?	1703.6	8	13.017	12.789	12.401	11.883	10.589	8	8	8	8	8	8	8	90.938	0	0	0	0	0
								Medium_Lowland	PAN2423	80	3	2017-09-16	2017	rice	0	7324.9	2069.1	?	0	0.66	1.27	0.954	0.996	0	0.991	?	?	?	?	1703.6	8	13.033	12.884	12.488	11.96	10.64	8	8	8	8	8	8	8	75.832	0	0	0	0	0
								Medium_Lowland	PAN2423	80	3	2017-09-17	2017	rice	0	7352	2123.5	?	0	21.01	1.298	0.954	0.996	0	1	?	?	?	?	1703.6	8	14.336	13.318	12.887	12.312	10.875	8	8	8	8	8	8	8	81.559	0	0	0	0	0
								Medium_Lowland	PAN2423	80	3	2017-09-18	2017	rice	0	7523.7	2319.9	?	0	16.1	1.329	0.954	0.996	0	0.993	?	?	?	?	1703.6	8	8.478	8.95	8.873	8.77	8.513	8	8	8	8	8	8	8	87.305	0	0	0	0	0
								Medium_Lowland	PAN2423	80	3	2017-09-19	2017	rice	0	7639.7	2458	?	0	15.98	1.359	0.954	0.996	0	0.993	?	?	?	?	1703.6	8	13.152	12.404	12.047	11.571	10.381	8	8	8	8	8	8	8	88.848	0	0	0	0	0
								Medium_Lowland	PAN2423	80	3	2017-09-20	2017	rice	0	7750.4	2588.7	?	0	23.2	1.389	0.954	0.996	0	0.993	?	?	?	?	1703.6	8	10.47	10.332	10.143	9.89	9.26	8	8	8	8	8	8	8	100.389	0	0	0	0	0
								Medium_Lowland	PAN2423	80	3	2017-09-21	2017	rice	0	7891.2	2747.4	?	0	3.71	1.42	0.954	0.996	0	0.993	?	?	?	?	1703.6	8	10.035	10.207	10.028	9.789	9.193	8	8	8	8	8	8	8	92.295	0	0	0	0	0
								Medium_Lowland	PAN2423	80	3	2017-09-22	2017	rice	0	8033.3	2905.7	?	0	1.65	1.451	0.954	0.996	0	0.993	?	?	?	?	1703.6	8	11.356	11.392	11.117	10.75	9.834	8	8	8	8	8	8	8	80.335	0	0	0	0	0
								Medium_Lowland	PAN2423	80	3	2017-09-23	2017	rice	0	8171	3057.9	?	0	0.24	1.481	0.954	0.996	0	0.993	?	?	?	?	1703.6	8	12.301	12.22	11.878	11.422	10.281	8	8	8	8	8	8	8	65.702	0	0	0	0	0
								Medium_Lowland	PAN2423	80	3	2017-09-24	2017	rice	0	8296.7	3196.7	?	0	0.87	1.511	0.954	0.996	0	0.991	?	?	?	?	1703.6	8	12.952	12.752	12.367	11.853	10.569	8	8	8	8	8	8	8	50.921	0	0	0	0	0
								Medium_Lowland	PAN2423	80	3	2017-09-25	2017	rice	0	8413.7	3325.5	?	0	1.28	1.54	0.954	0.996	0	0.993	?	?	?	?	1703.6	8	13.341	12.927	12.527	11.995	10.663	8	8	8	8	8	8	8	36.453	0	0	0	0	0
								Medium_Lowland	PAN2423	80	3	2017-09-26	2017	rice	0	8523.5	3445.9	?	0	0.64	1.57	0.954	0.996	0	0.993	?	?	?	?	1703.6	8	12.585	12.318	11.968	11.501	10.334	8	8	8	8	8	8	8	22.184	0	0	0	0	0
								Medium_Lowland	PAN2423	80	3	2017-09-27	2017	rice	0	8612.2	3544	?	0	9.57	1.6	0.954	0.996	0	0.993	?	?	?	?	1703.6	8	12.828	12.149	11.813	11.364	10.243	8	8	8	8	8	8	8	17.517	0	0	0	0	0
								Medium_Lowland	PAN2423	80	3	2017-09-28	2017	rice	0	8707.3	3647.7	?	0	9.92	1.63	0.954	0.996	0	0.993	?	?	?	?	1703.6	8	10.242	10.394	10.2	9.941	9.294	8	8	8	8	8	8	8	15.27	0	0	0	0	0
								Medium_Lowland	PAN2423	80	3	2017-09-29	2017	rice	0	8766	3714.2	?	0	16.46	1.66	0.954	0.996	0	0.998	?	?	?	?	1703.6	8	11.874	11.334	11.064	10.703	9.802	8	8	8	8	8	8	8	18.79	0	0	0	0	0
								Medium_Lowland	PAN2423	80	3	2017-09-30	2017	rice	0	8827.3	3782.4	?	0	10.67	1.69	0.954	0.996	0	0.996	?	?	?	?	1703.6	8	9.488	9.412	9.298	9.145	8.763	8	8	8	8	8	8	8	19.051	0	0	0	0	0
								Medium_Lowland	PAN2423	80	3	2017-10-01	2017	rice	0	8844.6	3806	?	0	21.05	1.719	0.954	0.996	0	1	?	?	?	?	1703.6	8	9.694	9.607	9.477	9.303	8.869	8	8	8	8	8	8	8	29.724	0	0	0	0	0
								Medium_Lowland	PAN2423	80	3	2017-10-02	2017	rice	0	8917	3884	?	0	7.15	1.75	0.954	0.996	0	0.993	?	?	?	?	1703.6	8	8.215	8.531	8.488	8.43	8.287	8	8	8	8	8	8	8	27.223	0	0	0	0	0
								Medium_Lowland	PAN2423	80	3	2017-10-03	2017	rice	0	8975.6	3947.7	?	0	2.18	1.779	0.954	0.996	0	0.993	?	?	?	?	1703.6	8	11.295	10.877	10.644	10.333	9.555	8	8	8	8	8	8	8	16.726	0	0	0	0	0
								Medium_Lowland	PAN2423	80	3	2017-10-04	2017	rice	0	9034.9	4011.5	?	0	0.27	1.809	0.954	0.996	0	0.993	?	?	?	?	1703.6	8	9.567	9.977	9.817	9.603	9.069	8	8	8	8	8	8	8	5.037	0	0	0	0	0
								Medium_Lowland	PAN2423	80	3	2017-10-05	2017	rice	0	9079.4	4060.2	?	0	2.31	1.839	0.954	0.996	0	1	?	?	?	?	1703.6	6.96	6.685	5.902	5.626	5.257	4.337	4.8	6.96	6.96	6.96	6.96	6.96	6.96	0	0	0	0	0	0
								Medium_Lowland	PAN2423	80	3	2017-10-06	2017	rice	0	9126.4	4110.8	?	0	1.35	1.869	0.954	0.996	0	0.994	?	?	?	?	1703.6	6.96	0.973	0.882	0.855	1.14	2.5	4.513	6.96	6.96	6.96	6.96	6.96	6.96	0	0	0	0	0	0
								Medium_Lowland	PAN2423	80	3	2017-10-07	2017	rice	0	9182.1	4169.9	?	0	9.83	1.899	0.954	0.996	0	1	?	?	?	?	1703.6	6.837	9.206	9.061	8.733	7.975	5.432	4.299	6.837	6.837	6.837	6.837	6.837	6.837	0	0	0	0	0	0
								Medium_Lowland	PAN2423	80	3	2017-10-08	2017	rice	0	9250.4	4241.2	?	0	36.4	1.929	0.954	0.996	0	1	?	?	?	?	1703.6	6.96	18.773	18.711	18.617	18.491	18.178	12	6.96	6.96	6.96	6.96	6.96	6.96	0	0	0	0	0	0
								Medium_Lowland	PAN2423	80	3	2017-10-09	2017	rice	0	9277.6	4271.1	?	0	84.81	1.958	0.954	0.996	0	1	?	?	?	?	1703.6	8	11.413	11.346	11.246	11.111	10.776	10.104	8	8	8	8	8	8	0	0	0	0	0	0
								Medium_Lowland	PAN2423	80	3	2017-10-10	2017	rice	0	9374	4369.9	?	0	14.42	1.987	0.954	0.996	0.726	0.995	?	?	?	?	1703.6	8	8.462	8.438	8.402	8.355	8.237	8	8	8	8	8	8	8	0	0	0	0	0	0
								Medium_Lowland	PAN2423	80	3	2017-10-11	2017	rice	0	9478.2	4476.3	?	0	2.29	2.017	0.954	0.996	1	0.993	?	?	?	?	1703.6	6.96	1.633	1.64	1.487	1.283	2.5	4.8	6.96	6.96	6.96	6.96	6.96	6.96	0	0	0	0	0	0
								Medium_Lowland	PAN2423	80	3	2017-10-12	2017	rice	0	9578.2	4578.3	?	0	0.43	2.047	0.954	0.996	1	0.974	?	?	?	?	1703.6	6.96	-0.3	0.543	0.855	1.14	1.887	3.715	6.96	6.96	6.96	6.96	6.96	6.96	0	0	0	0	0	0
								Medium_Lowland	PAN2423	80	3	2017-10-13	2017	rice	0	9676.5	4678.3	?	0	3.75	2.077	0.954	0.996	1	0.918	?	?	?	?	1703.6	5.702	2.984	1.927	1.25	1.14	1.226	2.259	5.702	5.702	5.702	5.702	5.702	5.702	0	0	0	0	0	0
								Medium_Lowland	PAN2423	80	3	2017-10-14	2017	rice	0	9766.9	4770.3	?	0	3.81	2.107	0.954	0.996	1	0.884	?	?	?	?	1703.6	4.05	3.09	2.934	2.765	1.881	1.273	1.416	3.987	4.05	4.05	4.05	4.05	4.05	0	0	0	0	0	0
								Medium_Lowland	PAN2423	80	3	2017-10-15	2017	rice	0	9858.6	4863.4	?	0	0.17	2.136	0.954	0.996	1	0.832	?	?	?	?	1703.6	4.05	-0.634	0.505	0.855	1.14	0.965	0.849	2.732	4.05	4.05	4.05	4.05	4.05	0	0	0	0	0	0
								Medium_Lowland	PAN2423	80	3	2017-10-16	2017	rice	0	9949.3	4955.4	?	0	0.05	2.164	0.954	0.996	1	0.774	?	?	?	?	1703.6	4.05	-0.56	-0.721	0.522	1.047	0.72	0.34	1.775	4.05	4.05	4.05	4.05	4.05	0	0	0	0	0	0
								Medium_Lowland	PAN2423	80	3	2017-10-17	2017	rice	0	10039.2	5046.5	?	0	0.44	2.192	0.954	0.996	1	0.703	?	?	?	?	1703.6	4.05	-0.558	-0.335	-0.565	0.413	0.531	-0.062	1.065	3.273	4.05	4.05	4.05	4.05	0	0	0	0	0	0
								Medium_Lowland	PAN2423	80	3	2017-10-18	2017	rice	0	10128	5136.3	?	0	6.84	2.22	0.954	0.996	1	0.772	?	?	?	?	1703.6	4.05	5.444	4.087	2.084	0.861	0.472	-0.183	0.614	2.475	4.05	4.05	4.05	4.05	0	0	0	0	0	0
								Medium_Lowland	PAN2423	80	3	2017-10-19	2017	rice	0	10203.4	5212.6	?	0	40.93	2.249	0.954	0.996	1	0.993	?	?	?	?	1703.6	4.05	33.145	32.768	32.617	30.997	25.406	12	5.095	3.261	4.05	4.05	4.05	4.05	0	0	0	0	0	0
								Medium_Lowland	PAN2423	80	3	2017-10-20	2017	rice	0	10220.2	5230.3	?	0	45.99	2.279	0.954	0.996	1	1	?	?	?	?	1703.6	4.05	13.373	13.219	13.12	12.988	12.659	12	6.96	4.05	4.05	4.05	4.05	4.05	0	0	0	0	0	0
								Medium_Lowland	PAN2423	80	3	2017-10-21	2017	rice	0	10258.9	5269.8	?	0	53.2	2.307	0.954	0.996	1	1	?	?	?	?	1703.6	4.05	12.253	12.24	12.221	12.195	12.13	12	7.283	4.303	4.05	4.05	4.05	4.05	0	0	0	0	0	0
								Medium_Lowland	PAN2423	80	3	2017-10-22	2017	rice	0	10343.2	5354.7	?	0	0.37	2.334	0.954	0.996	1	0.978	?	?	?	?	1703.6	4.073	-0.582	0.57	0.855	1.14	2.5	4.8	6.96	6.96	4.073	4.073	4.073	4.073	0	0	0	0	0	0
								Medium_Lowland	PAN2423	80	3	2017-10-23	2017	rice	0	10425.2	5437.3	?	0	0.06	2.362	0.954	0.996	1	0.945	?	?	?	?	1703.6	6.96	-0.777	-0.791	0.617	1.14	2.072	4.2	6.96	6.96	6.96	6.96	6.96	6.96	0	0	0	0	0	0
								Medium_Lowland	PAN2423	80	3	2017-10-24	2017	rice	0	10503.2	5515.9	?	0	1	2.389	0.954	0.996	1	0.851	?	?	?	?	1703.6	6.018	-0.381	-0.229	-0.519	0.515	1.057	2.566	6.018	6.018	6.018	6.018	6.018	6.018	0	0	0	0	0	0
								Medium_Lowland	PAN2423	80	3	2017-10-25	2017	rice	0	10577.9	5591.1	?	0	4.26	2.418	0.954	0.996	1	0.837	?	?	?	?	1703.6	4.164	2.818	1.739	0.793	0.308	0.468	1.384	4.164	4.164	4.164	4.164	4.164	4.164	0	0	0	0	0	0
								Medium_Lowland	PAN2423	80	3	2017-10-26	2017	rice	0	10651.7	5665.3	?	0	0.39	2.446	0.954	0.996	1	0.769	?	?	?	?	1703.6	4.05	-0.562	0.362	0.521	0.34	0.218	0.62	2.747	4.05	4.05	4.05	4.05	4.05	0	0	0	0	0	0
								Medium_Lowland	PAN2423	80	3	2017-10-27	2017	rice	0	10726.3	5740.4	?	0	0.02	2.472	0.954	0.996	1	0.704	?	?	?	?	1703.6	4.05	-0.816	-0.835	0.207	0.203	0.032	0.1	1.688	4.05	4.05	4.05	4.05	4.05	0	0	0	0	0	0
								Medium_Lowland	PAN2423	80	3	2017-10-28	2017	fallow	0	0	0	?	0	0	0	1	1	1	1	?	?	?	?	0	4.05	-1.094	-0.661	-0.801	-0.396	-0.037	-0.227	1.013	3.254	4.05	4.05	4.05	4.05	0	0	0	0	0	0
								Medium_Lowland	PAN2423	80	3	2017-10-29	2017	fallow	0	0	0	?	0	0.05	0	1	1	1	1	?	?	?	?	0	4.05	-0.95	-0.89	-0.689	-0.503	-0.175	-0.174	0.517	2.433	4.05	4.05	4.05	4.05	0	0	0	0	0	0
								Medium_Lowland	PAN2423	80	3	2017-10-30	2017	fallow	0	0	0	?	0	1.13	0	1	1	1	1	?	?	?	?	0	4.05	-0.87	-0.798	-0.671	-0.529	-0.248	-0.152	0.241	1.775	3.859	4.05	4.05	4.05	0	0	0	0	0	0
								Medium_Lowland	PAN2423	80	3	2017-10-31	2017	fallow	0	0	0	?	0	0.03	0	1	1	1	1	?	?	?	?	0	4.05	-0.906	-0.812	-0.691	-0.564	-0.292	-0.147	0.083	1.268	3.081	4.05	4.05	4.05	0	0	0	0	0	0
								Medium_Lowland	PAN2423	80	3	2017-11-01	2017	fallow	0	0	0	?	0	0	0	1	1	1	1	?	?	?	?	0	4.05	-0.874	-0.801	-0.7	-0.564	-0.318	-0.15	-0.172	0.887	2.423	4.05	4.05	4.05	0	0	0	0	0	0
								Medium_Lowland	PAN2423	80	3	2017-11-02	2017	fallow	0	0	0	?	0	0	0	1	1	1	1	?	?	?	?	0	4.05	-0.85	-0.79	-0.693	-0.532	-0.328	-0.162	0	0.57	1.867	3.774	4.05	4.05	0	0	0	0	0	0
								Medium_Lowland	PAN2423	80	3	2017-11-03	2017	fallow	0	0	0	?	0	0	0	1	1	1	1	?	?	?	?	0	4.05	-0.83	-0.775	-0.671	-0.518	-0.334	-0.163	-0.22	0.399	1.427	3.07	4.05	4.05	0	0	0	0	0	0
								Medium_Lowland	PAN2423	80	3	2017-11-04	2017	fallow	0	0	0	?	0	0	0	1	1	1	1	?	?	?	?	0	4.05	-0.812	-0.755	-0.654	-0.507	-0.335	-0.176	-0.196	0.213	1.063	2.468	4.05	4.05	0	0	0	0	0	0
								Medium_Lowland	PAN2423	80	3	2017-11-05	2017	fallow	0	0	0	?	0	0.03	0	1	1	1	1	?	?	?	?	0	3.786	-0.699	-0.681	-0.606	-0.487	-0.335	-0.187	-0.182	0.09	0.771	1.959	3.786	3.786	0	0	0	0	0	0
								Medium_Lowland	PAN2423	80	3	2017-11-06	2017	fallow	0	0	0	?	0	0.01	0	1	1	1	1	?	?	?	?	0	3.11	-0.635	-0.624	-0.565	-0.468	-0.334	-0.195	-0.173	0.009	0.542	1.534	3.11	3.11	0	0	0	0	0	0
								Medium_Lowland	PAN2423	80	3	2017-11-07	2017	fallow	0	0	0	?	0	0	0	1	1	1	1	?	?	?	?	0	2.534	-0.586	-0.578	-0.53	-0.45	-0.331	-0.201	-0.166	0	0.38	1.188	2.534	2.534	0	0	0	0	0	0
								Medium_Lowland	PAN2423	80	3	2017-11-08	2017	fallow	0	0	0	?	0	0	0	1	1	1	1	?	?	?	?	0	2.047	-0.546	-0.54	-0.501	-0.433	-0.328	-0.205	-0.159	0	0.266	0.911	2.047	2.047	0	0	0	0	0	0
								Medium_Lowland	PAN2423	80	3	2017-11-09	2017	fallow	0	0	0	?	0	0	0	1	1	1	1	?	?	?	?	0	1.641	-0.513	-0.508	-0.476	-0.418	-0.324	-0.209	-0.153	0	0.186	0.693	1.641	1.641	0	0	0	0	0	0
								Medium_Lowland	PAN2423	80	3	2017-11-10	2017	fallow	0	0	0	?	0	0	0	1	1	1	1	?	?	?	?	0	1.35	-0.486	-0.482	-0.455	-0.405	-0.32	-0.211	-0.148	0	0.13	0.524	1.306	1.35	0	0	0	0	0	0
								Medium_Lowland	PAN2423	80	3	2017-11-11	2017	fallow	0	0	0	?	0	0	0	1	1	1	1	?	?	?	?	0	1.35	-0.462	-0.459	-0.436	-0.393	-0.316	-0.213	-0.143	0	0.091	0.394	1.032	1.35	0	0	0	0	0	0
								Medium_Lowland	PAN2423	80	3	2017-11-12	2017	fallow	0	0	0	?	0	0	0	1	1	1	1	?	?	?	?	0	1.35	-0.442	-0.439	-0.419	-0.382	-0.312	-0.214	-0.139	0	0.064	0.295	0.811	1.35	0	0	0	0	0	0
								Medium_Lowland	PAN2423	80	3	2017-11-13	2017	fallow	0	0	0	?	0	0	0	1	1	1	1	?	?	?	?	0	1.27	-0.424	-0.422	-0.405	-0.372	-0.308	-0.214	-0.135	0	0.045	0.22	0.634	1.27	0	0	0	0	0	0
								Medium_Lowland	PAN2423	80	3	2017-11-14	2017	fallow	0	0	0	?	0	1.87	0	1	1	1	1	?	?	?	?	0	1.037	-0.408	-0.407	-0.392	-0.363	-0.304	-0.214	-0.131	0	0.031	0.163	0.493	1.037	0	0	0	0	0	0
								Medium_Lowland	PAN2423	80	3	2017-11-15	2017	fallow	0	0	0	?	0	24.74	0	1	1	1	1	?	?	?	?	0	0.84	23.221	20.609	17.092	12.793	4.441	0.788	0.068	0	0.022	0.121	0.381	0.84	0	0	0	0	0	0
								Medium_Lowland	PAN2423	80	3	2017-11-16	2017	fallow	0	0	0	?	0	5.85	0	1	1	1	1	?	?	?	?	0	0.676	4.582	5.275	5.275	5.275	5.275	2.583	1.074	0	0.015	0.089	0.294	0.676	0	0	0	0	0	0
								Medium_Lowland	PAN2423	80	3	2017-11-17	2017	fallow	0	0	0	?	0	2.67	0	1	1	1	1	?	?	?	?	0	0.545	1.193	1.402	1.402	1.402	2.5	2.55	1.664	0.444	0.144	0.106	0.237	0.545	0	0	0	0	0	0
								Medium_Lowland	PAN2423	80	3	2017-11-18	2017	fallow	0	0	0	?	0	3.98	0	1	1	1	1	?	?	?	?	0	0.448	1.815	2.503	2.503	2.503	2.5	2.53	2.011	0.914	0.375	0.186	0.222	0.448	0	0	0	0	0	0
								Medium_Lowland	PAN2423	80	3	2017-11-19	2017	fallow	0	0	0	?	0	0.22	0	1	1	1	1	?	?	?	?	0	0.389	-1.095	-1.266	0.855	1.14	2.5	2.518	2.213	1.304	0.654	0.327	0.253	0.389	0	0	0	0	0	0
								Medium_Lowland	PAN2423	80	3	2017-11-20	2017	fallow	0	0	0	?	0	0.01	0	1	1	1	1	?	?	?	?	0	0.372	-0.967	-0.58	-0.982	0.997	1.771	2.219	2.216	1.577	0.931	0.508	0.33	0.372	0	0	0	0	0	0
								Medium_Lowland	PAN2423	80	3	2017-11-21	2017	fallow	0	0	0	?	0	0.01	0	1	1	1	1	?	?	?	?	0	0.393	-0.614	-0.761	-0.432	0.008	0.89	1.687	2.004	1.706	1.163	0.704	0.442	0.393	0	0	0	0	0	0
								Medium_Lowland	PAN2423	80	3	2017-11-22	2017	fallow	0	0	0	?	0	0	0	1	1	1	1	?	?	?	?	0	0.448	-0.609	-0.538	-0.307	-0.609	0.445	1.19	1.679	1.698	1.324	0.89	0.577	0.448	0	0	0	0	0	0
								Medium_Lowland	PAN2423	80	3	2017-11-23	2017	fallow	0	0	0	?	0	0	0	1	1	1	1	?	?	?	?	0	0.528	-0.493	-0.419	-0.5	-0.357	-0.24	0.714	1.293	1.576	1.399	1.043	0.716	0.528	0	0	0	0	0	0
								Medium_Lowland	PAN2423	80	3	2017-11-24	2017	fallow	0	0	0	?	0	0	0	1	1	1	1	?	?	?	?	0	0.624	-0.423	-0.454	-0.413	-0.363	-0.176	0.333	0.909	1.376	1.392	1.148	0.846	0.624	0	0	0	0	0	0
								Medium_Lowland	PAN2423	80	3	2017-11-25	2017	fallow	0	0	0	?	0	0	0	1	1	1	1	?	?	?	?	0	0.722	-0.412	-0.412	-0.391	-0.33	-0.167	0.129	0.597	1.142	1.317	1.199	0.952	0.722	0	0	0	0	0	0
								Medium_Lowland	PAN2423	80	3	2017-11-26	2017	fallow	0	0	0	?	0	0	0	1	1	1	1	?	?	?	?	0	0.813	-0.38	-0.385	-0.361	-0.306	-0.175	0.01	0.362	0.908	1.195	1.197	1.025	0.813	0	0	0	0	0	0
								Medium_Lowland	PAN2423	80	3	2017-11-27	2017	fallow	0	0	0	?	0	0	0	1	1	1	1	?	?	?	?	0	0.888	-0.356	-0.358	-0.336	-0.29	-0.176	-0.127	0.217	0.701	1.047	1.152	1.063	0.888	0	0	0	0	0	0
								Medium_Lowland	PAN2423	80	3	2017-11-28	2017	fallow	0	0	0	?	0	0	0	1	1	1	1	?	?	?	?	0	0.942	-0.335	-0.336	-0.316	-0.276	-0.192	-0.119	0.079	0.515	0.887	1.073	1.066	0.942	0	0	0	0	0	0
								Medium_Lowland	PAN2423	80	3	2017-11-29	2017	fallow	0	0	0	?	0	0	0	1	1	1	1	?	?	?	?	0	0.97	-0.317	-0.317	-0.299	-0.269	-0.198	-0.118	-0.118	0.36	0.729	0.969	1.037	0.97	0	0	0	0	0	0
								Medium_Lowland	PAN2423	80	3	2017-11-30	2017	fallow	0	0	0	?	0	0	0	1	1	1	1	?	?	?	?	0	0.974	-0.302	-0.301	-0.287	-0.262	-0.201	-0.124	0	0.217	0.575	0.851	0.981	0.974	0	0	0	0	0	0
								Medium_Lowland	PAN2423	120	4	2016-06-01	2016	?	0	0	0	?	0	9.92	0	1	1	1	1	?	?	?	?	0	0.001	7.705	8.21	6.5	4.22	2.11	0.844	0.338	0.101	0.03	0.009	0.003	0.001	0	91.8	277.4	300.9	221	115.2
								Medium_Lowland	PAN2423	120	4	2016-06-02	2016	?	0	0	0	?	0	6.46	0	1	1	1	1	?	?	?	?	0	0.005	3.99	3.99	3.99	3.99	2.5	1.506	0.805	0.312	0.115	0.041	0.014	0.005	0	29.9	98.4	165.2	201.2	135.6
								Medium_Lowland	PAN2423	120	4	2016-06-03	2016	?	0	0	0	?	0	5.3	0	1	1	1	1	?	?	?	?	0	0.016	2.83	2.83	2.83	2.83	2.5	1.904	1.245	0.592	0.258	0.106	0.042	0.016	0	16.3	55.1	106.6	137.8	134.8
								Medium_Lowland	PAN2423	120	4	2016-06-04	2016	?	0	0	0	?	0	5.23	0	1	1	1	1	?	?	?	?	0	0.039	2.76	2.76	2.76	2.76	2.5	2.142	1.604	0.896	0.449	0.209	0.092	0.039	0	14.2	43.1	93.8	129.1	133.7
								Medium_Lowland	PAN2423	120	4	2016-06-05	2016	?	0	0	0	?	0	6.79	0	1	1	1	1	?	?	?	?	0	0.078	4.32	4.32	4.32	4.32	3.51	2.689	2.038	1.238	0.686	0.352	0.17	0.078	0	19.1	49.8	123.5	187	184.6
								Medium_Lowland	PAN2423	120	4	2016-06-06	2016	?	0	0	0	?	0	8.33	0	1	1	1	1	?	?	?	?	0	0.139	5.948	5.86	5.86	5.86	5.86	3.958	2.806	1.709	0.993	0.544	0.282	0.139	0	17.8	45.4	131	223.9	298.4
								Medium_Lowland	PAN2423	120	4	2016-06-07	2016	?	0	0	0	?	0	5.57	0	1	1	1	1	?	?	?	?	0	0.227	3.356	3.232	3.232	3.232	3.232	3.667	3.15	2.141	1.337	0.782	0.432	0.227	0	6.9	19.4	62.2	114.3	161.2
								Medium_Lowland	PAN2423	120	4	2016-06-08	2016	?	0	0	0	?	0	4.23	0	1	1	1	1	?	?	?	?	0	0.344	1.866	2.077	2.077	2.077	2.5	3.2	3.17	2.45	1.671	1.049	0.617	0.344	0	1.9	10.4	36.1	69.6	122.9
								Medium_Lowland	PAN2423	120	4	2016-06-09	2016	?	0	0	0	?	0	3.43	0	1	1	1	1	?	?	?	?	0	0.49	0.96	0.96	0.96	1.14	2.5	2.92	3.07	2.636	1.961	1.322	0.829	0.49	0	0.4	4.3	15.9	37.2	121.9
								Medium_Lowland	PAN2423	120	4	2016-06-10	2016	?	0	0	0	?	0	2.7	0	1	1	1	1	?	?	?	?	0	0.659	0.343	0.57	0.855	1.14	2.179	2.624	2.892	2.713	2.186	1.582	1.055	0.659	0	-0.4	2.4	13.7	36.4	105.3
								Medium_Lowland	PAN2423	120	4	2016-06-11	2016	?	0	0	0	?	0	2.24	0	1	1	1	1	?	?	?	?	0	0.846	-0.058	0.285	0.855	1.14	1.659	2.238	2.63	2.688	2.337	1.808	1.281	0.846	0	-0.9	1.2	13.5	35.6	79.4
								Medium_Lowland	PAN2423	120	4	2016-06-12	2016	?	0	0	0	?	0	8.4	0	1	1	1	1	?	?	?	?	0	1.04	5.645	5.075	4.22	3.47	2.5	2.343	2.515	2.636	2.427	1.994	1.495	1.04	0	8.8	15.2	51.3	95.4	115.8
								Medium_Lowland	PAN2423	120	4	2016-06-13	2016	?	0	0	0	?	0	21.37	0	1	1	1	1	?	?	?	?	0	1.24	19.53	18.72	18.72	18.72	16.349	7.863	4.655	3.242	2.671	2.197	1.705	1.24	0	10.1	22.5	109.3	309.6	608.5
								Medium_Lowland	PAN2423	120	4	2016-06-14	2016	?	0	0	0	?	0	10.75	0	1	1	1	1	?	?	?	?	0	1.35	8.535	9.346	9.346	9.346	9.346	9.346	6.531	4.05	3.085	2.463	1.933	1.35	0	1.3	6.3	35	114.1	307.6
								Medium_Lowland	PAN2423	120	4	2016-06-15	2016	?	0	0	0	?	0	7.46	0	1	1	1	1	?	?	?	?	0	1.35	4.99	4.99	4.99	4.99	4.99	4.99	5.915	4.05	3.374	2.737	2.174	1.35	0	0.6	2.2	14.3	50.9	152.9
								Medium_Lowland	PAN2423	120	4	2016-06-16	2016	?	0	0	0	?	0	2.91	0	1	1	1	1	?	?	?	?	0	2.218	0.483	0.57	0.855	1.14	2.5	4.8	5.469	4.05	3.577	2.989	2.418	2.218	0	-0.1	0.2	2.4	11.3	75.3
								Medium_Lowland	PAN2423	120	4	2016-06-17	2016	?	0	0	0	?	0	9.94	0	1	1	1	1	?	?	?	?	0	2.682	7.427	7.34	7.055	6.77	5.41	4.8	5.201	5.029	4.013	3.296	2.682	2.682	0	0.8	1.9	13.2	51.6	146.7
								Medium_Lowland	PAN2423	120	4	2016-06-18	2016	?	0	0	0	?	0	6.62	0	1	1	1	1	?	?	?	?	0	2.934	4.15	4.15	4.15	4.15	4.15	4.8	5.041	5.041	4.05	3.522	2.934	2.934	0	0.3	0.8	6.2	26.9	105.3
								Medium_Lowland	PAN2423	120	4	2016-06-19	2016	?	0	0	0	?	0	4.81	0	1	1	1	1	?	?	?	?	0	3.158	2.34	2.34	2.34	2.34	2.5	4.8	4.944	4.944	4.05	3.68	3.158	3.158	0	0.1	0.4	3	13.8	61
								Medium_Lowland	PAN2423	120	4	2016-06-20	2016	?	0	0	0	?	0	1.92	0	1	1	1	1	?	?	?	?	0	3.348	-0.268	0.295	0.855	1.14	2.5	3.944	4.544	4.544	4.05	3.791	3.348	3.348	0	-0.1	0	1.1	6.5	59.9
								Medium_Lowland	PAN2423	120	4	2016-06-21	2016	?	0	0	0	?	0	0.79	0	1	1	1	1	?	?	?	?	0	3.504	-0.824	-1.359	0.575	1.14	2.31	3.29	4.043	4.05	4.05	3.869	3.504	3.504	0	-0.3	-1.7	0.7	6.3	54.2
								Medium_Lowland	PAN2423	120	4	2016-06-22	2016	?	0	0	0	?	0	0.58	0	1	1	1	1	?	?	?	?	0	3.63	-1.087	-0.652	-1.115	0.715	1.512	2.579	3.457	4.05	4.05	3.923	3.63	3.63	0	-0.5	-1.2	-6.2	4	35.1
								Medium_Lowland	PAN2423	120	4	2016-06-23	2016	?	0	0	0	?	0	2.19	0	1	1	1	1	?	?	?	?	0	3.729	-0.404	-0.689	-0.393	-0.743	0.756	1.85	2.814	4.05	4.05	3.961	3.729	3.729	0	-0.5	-1.3	-2.6	-17.2	17.5
								Medium_Lowland	PAN2423	120	4	2016-06-24	2016	?	0	0	0	?	0	2.03	0	1	1	1	1	?	?	?	?	0	3.807	-0.508	-0.462	-0.583	-0.414	0.007	1.113	2.134	4.05	4.05	3.988	3.807	3.807	0	-0.5	-1.1	-4	-9.6	0.2
								Medium_Lowland	PAN2423	120	4	2016-06-25	2016	?	0	0	0	?	0	0.56	0	1	1	1	1	?	?	?	?	0	3.867	-1.016	-0.842	-0.659	-0.471	-0.32	0.668	1.547	3.389	4.05	4.007	3.867	3.867	0	-0.9	-2.1	-4.9	-11.1	-13.7
								Medium_Lowland	PAN2423	120	4	2016-06-26	2016	?	0	0	0	?	0	6.18	0	1	1	1	1	?	?	?	?	0	3.913	3.09	2.692	0.855	0.519	0	0.273	1.037	2.683	4.05	4.02	3.913	3.913	0	0.8	1.7	1.7	3.6	0
								Medium_Lowland	PAN2423	120	4	2016-06-27	2016	?	0	0	0	?	0	8.83	0	1	1	1	1	?	?	?	?	0	3.904	6.36	6.36	5.808	3.456	1.709	0.847	0.961	2.167	3.564	3.883	3.904	3.904	0	1.1	2.6	8.6	19	37.1
								Medium_Lowland	PAN2423	120	4	2016-06-28	2016	?	0	0	0	?	25	8.51	0	1	1	1	1	?	?	?	?	0	3.857	26.021	26.021	26.021	26.021	22.73	12	5.377	3.13	3.434	3.748	3.857	3.857	0	1.2	3.4	15.5	68.2	326.9
								Medium_Lowland	PAN2423	120	4	2016-06-29	2016	?	0	0	0	?	0	4.34	0	1	1	1	1	?	?	?	?	0	3.804	1.87	1.87	1.87	1.87	2.5	4.8	5.146	3.735	3.524	3.681	3.804	3.804	0	0	0.2	1	4.5	34.8
								Medium_Lowland	PAN2423	120	4	2016-06-30	2016	?	0	0	0	?	0	3.28	0	1	1	1	1	?	?	?	?	0	3.767	0.81	0.81	0.855	1.14	2.5	4.8	5.008	4.05	3.682	3.681	3.767	3.767	0	0	0.1	0.4	2.7	34
								Medium_Lowland	PAN2423	120	4	2016-07-01	2016	?	0	0	0	?	0	9.47	0	1	1	1	1	?	?	?	?	0	3.752	7	7	6.955	6.67	4.68	4.8	4.925	4.05	3.792	3.715	3.752	3.752	0	0.2	0.4	2.5	11.9	56.3
								Medium_Lowland	PAN2423	120	4	2016-07-02	2016	rice	0	3.8	0	?	0	28.72	0.015	1	1	1	1	?	?	?	?	2.3	3.754	16.72	16.72	16.72	16.72	16.72	12	6.96	4.05	3.87	3.761	3.754	3.754	6.993	0.2	0.4	2.9	17	151.2
								Medium_Lowland	PAN2423	120	4	2016-07-03	2016	rice	0	6.5	0	?	0	61.07	0.031	1	1	1	1	?	?	?	?	3.9	3.782	13.279	12	12	12	12	12	7.027	6.983	4.05	3.848	3.782	3.782	52.658	0.1	0.1	1.2	7.9	87.3
								Medium_Lowland	PAN2423	120	4	2016-07-04	2016	rice	0	9.3	0	?	0	21.97	0.046	1	1	1	1	?	?	?	?	5.6	3.863	8.193	8	8	8	8	8	8	8	6.462	4.05	3.863	3.863	64.95	0	0.1	0.5	3.8	50
								Medium_Lowland	PAN2423	120	4	2016-07-05	2016	rice	0	16.5	0	?	0	16.66	0.061	1	1	1	1	?	?	?	?	9.9	4.05	6.969	8	8	8	8	8	8	8	8	5.89	4.05	4.05	71.058	0	0	0.3	2.8	42.9
								Medium_Lowland	PAN2423	120	4	2016-07-06	2016	rice	0	26.6	0	?	0	6.15	0.077	1	1	1	1	?	?	?	?	15.9	5.353	7.862	8	8	8	8	8	8	8	8	8	5.353	5.353	65.384	0	0	0.2	2	36.7
								Medium_Lowland	PAN2423	120	4	2016-07-07	2016	rice	0	37.1	0	?	0	5.84	0.092	1	1	1	1	?	?	?	?	22.3	8	8.446	8	8	8	8	8	8	8	8	8	8	8	59.744	0	0	0.1	1.4	31.4
								Medium_Lowland	PAN2423	120	4	2016-07-08	2016	rice	0	57	0	?	0	9.53	0.107	1	1	1	1	?	?	?	?	34.2	8	7.251	8	8	8	8	8	8	8	8	8	8	8	57.007	0	0	0.1	1	26.8
								Medium_Lowland	PAN2423	120	4	2016-07-09	2016	rice	0	79.8	0	?	0	17.37	0.122	1	1	1	1	?	?	?	?	47.9	8	8.24	8	8	8	8	8	8	8	8	8	8	8	61.797	0	0	0.1	0.7	22.9
								Medium_Lowland	PAN2423	120	4	2016-07-10	2016	rice	0	113.3	0	?	0	4.58	0.137	1	1	1	1	?	?	?	?	68	8	7.76	8	8	8	8	8	8	8	8	8	8	8	53.521	0	0	0	0.5	19.5
								Medium_Lowland	PAN2423	120	4	2016-07-11	2016	rice	0	150.2	0	?	0	15.79	0.152	1	1	1	1	?	?	?	?	90.1	8	8.378	8	8	8	8	8	8	8	8	8	8	8	56.938	0	0	0	0.4	16.6
								Medium_Lowland	PAN2423	120	4	2016-07-12	2016	rice	0	184.4	0	?	0	7.89	0.167	1	1	1	1	?	?	?	?	110.6	8	8.766	8	8	8	8	8	8	8	8	8	8	8	53.856	0	0	0	0.3	14.1
								Medium_Lowland	PAN2423	120	4	2016-07-13	2016	rice	0	245.8	0	?	0	4.32	0.182	1	1	1	1	?	?	?	?	147.5	8	7.291	8	8	8	8	8	8	8	8	8	8	8	47.29	0	0	0	0.2	12
								Medium_Lowland	PAN2423	120	4	2016-07-14	2016	rice	0	284.8	0	?	0	8.36	0.197	1	1	1	1	?	?	?	?	170.9	8	8.577	8	8	8	8	8	8	8	8	8	8	8	44.631	0	0	0	0.1	10.2
								Medium_Lowland	PAN2423	120	4	2016-07-15	2016	rice	0	310.9	0	?	0	13.96	0.213	1	1	1	1	?	?	?	?	186.5	8	8.632	8	8	8	8	8	8	8	8	8	8	8	48.849	0	0	0	0.1	8.7
								Medium_Lowland	PAN2423	120	4	2016-07-16	2016	rice	0	348.5	0	?	0	21.22	0.228	1	1	1	1	?	?	?	?	209.1	8	7.471	8	8	8	8	8	8	8	8	8	8	8	60.431	0	0	0	0.1	7.4
								Medium_Lowland	PAN2423	120	4	2016-07-17	2016	rice	0	406.1	0	?	0	10.85	0.243	1	1	1	1	?	?	?	?	243.7	8	7.588	8	8	8	8	8	8	8	8	8	8	8	60.672	0	0	0	0	6.3
								Medium_Lowland	PAN2423	120	4	2016-07-18	2016	rice	0	455.5	0	?	0	5.77	0.258	1	1	1	1	?	?	?	?	273.3	8	8.093	8	8	8	8	8	8	8	8	8	8	8	55.515	0	0	0	0	5.3
								Medium_Lowland	PAN2423	120	4	2016-07-19	2016	rice	0	512.3	0	?	0	10.86	0.273	1	1	1	1	?	?	?	?	307.4	8	7.961	8	8	8	8	8	8	8	8	8	8	8	55.5	0	0	0	0	4.5
								Medium_Lowland	PAN2423	120	4	2016-07-20	2016	rice	0	577.2	0	?	0	3.68	0.288	1	1	1	1	?	?	?	?	346.3	8	7.796	8	8	8	8	8	8	8	8	8	8	8	48.062	0	0	0	0	3.9
								Medium_Lowland	PAN2423	120	4	2016-07-21	2016	rice	0	636.6	0	?	0	4.91	0.303	1	1	1	1	?	?	?	?	381.9	8	8.459	8	8	8	8	8	8	8	8	8	8	8	42.109	0	0	0	0	3.3
								Medium_Lowland	PAN2423	120	4	2016-07-22	2016	rice	0	83.5	0	?	0	13.34	0.319	1	1	1	1	?	?	?	?	50.1	8	8.363	8	8	8	8	8	8	8	8	8	8	8	45.407	0	0	0	0	2.8
								Medium_Lowland	PAN2423	120	4	2016-07-23	2016	rice	0	85.8	0	?	0	28.78	0.319	1	1	1	0.953	?	?	?	?	51.5	8	8.105	8	8	8	8	8	8	8	8	8	8	8	64.614	0	0	0	0	2.4
								Medium_Lowland	PAN2423	120	4	2016-07-24	2016	rice	0	91.2	0	?	0	8.56	0.319	1	1	0.826	0.934	?	?	?	?	54.7	8	7.414	8.039	8	8	8	8	8	8	8	8	8	8	62.977	0	0	0	0	2
								Medium_Lowland	PAN2423	120	4	2016-07-25	2016	rice	0	93.3	0	?	0	46.34	0.319	1	1	0.9	0.969	?	?	?	?	56	8	8.941	8.084	8.021	8	8	8	8	8	8	8	8	8	99.242	0	0	0	0	1.7
								Medium_Lowland	PAN2423	120	4	2016-07-26	2016	rice	0	98	0	?	0	22.19	0.319	1	1	1	0.969	?	?	?	?	58.8	8	7.507	8.036	8.014	8	8	8	8	8	8	8	8	8	111.718	0	0	0	0	1.4
								Medium_Lowland	PAN2423	120	4	2016-07-27	2016	rice	0	104.9	0	?	0	10.63	0.319	1	1	1	0.902	?	?	?	?	62.9	8	7.365	8.079	8.039	8	8	8	8	8	8	8	8	8	111.189	0	0	0	0	1.2
								Medium_Lowland	PAN2423	120	4	2016-07-28	2016	rice	0	112.8	0	?	0	0.6	0.319	1	1	1	0.881	?	?	?	?	67.7	8	7.822	8.143	8.082	8	8	8	8	8	8	8	8	8	99.074	0	0	0	0	1
								Medium_Lowland	PAN2423	120	4	2016-07-29	2016	rice	0	122	0	?	0	8.19	0.319	1	1	1	0.9	?	?	?	?	73.2	8	8.365	8.199	8.124	8.025	8	8	8	8	8	8	8	8	94.225	0	0	0	0	0.9
								Medium_Lowland	PAN2423	120	4	2016-07-30	2016	rice	0	130.2	0	?	0	8.02	0.319	1	1	1	0.966	?	?	?	?	78.1	8	9.004	8.222	8.148	8.049	8	8	8	8	8	8	8	8	90.291	0	0	0	0	0.8
								Medium_Lowland	PAN2423	120	4	2016-07-31	2016	rice	0	142.7	0	?	0	13.05	0.333	1	1	1	0.937	?	?	?	?	85.6	8	7.805	8.165	8.116	8.05	8	8	8	8	8	8	8	8	91.978	0	0	0	0	0.6
								Medium_Lowland	PAN2423	120	4	2016-08-01	2016	rice	0	152.9	0	?	0	30.95	0.348	1	1	1	0.981	?	?	?	?	91.8	8	9.07	8.273	8.198	8.099	8	8	8	8	8	8	8	8	111.788	0	0	0	0	0.5
								Medium_Lowland	PAN2423	120	4	2016-08-02	2016	rice	0	171.9	0	?	0	24.09	0.364	1	1	1	0.959	?	?	?	?	103.1	8	7.685	8.193	8.144	8.08	8	8	8	8	8	8	8	8	125.08	0	0	0	0	0.5
								Medium_Lowland	PAN2423	120	4	2016-08-03	2016	rice	0	200.4	0	?	0	15.7	0.379	1	1	1	0.937	?	?	?	?	120.2	8	8.018	8.372	8.286	8.172	8	8	8	8	8	8	8	8	128.686	0	0	0	0	0.4
								Medium_Lowland	PAN2423	120	4	2016-08-04	2016	rice	0	235.7	0	?	0	17.78	0.394	1	1	1	0.943	?	?	?	?	141.4	8	8.761	8.626	8.492	8.313	8	8	8	8	8	8	8	8	133.598	0	0	0	0	0.3
								Medium_Lowland	PAN2423	120	4	2016-08-05	2016	rice	0	262.9	0	?	0	19.24	0.409	1	1	1	0.985	?	?	?	?	157.7	8	9.736	8.75	8.6	8.4	8	8	8	8	8	8	8	8	140.889	0	0	0	0	0.3
								Medium_Lowland	PAN2423	120	4	2016-08-06	2016	rice	0	286	0	?	0	16.8	0.426	1	1	1	0.986	?	?	?	?	171.6	8	8.883	8.474	8.385	8.267	8	8	8	8	8	8	8	8	147.418	0	0	0	0	0.2
								Medium_Lowland	PAN2423	120	4	2016-08-07	2016	rice	0	310.4	0	?	0	22.95	0.443	1	1	1	0.987	?	?	?	?	186.3	8	8.546	8.39	8.322	8.23	8	8	8	8	8	8	8	8	160.667	0	0	0	0	0.2
								Medium_Lowland	PAN2423	120	4	2016-08-08	2016	rice	0	378.5	0	?	0	26.02	0.46	1	1	1	0.978	?	?	?	?	227.1	8	7.612	8.402	8.335	8.246	8.022	8	8	8	8	8	8	8	176.251	0	0	0	0	0.2
								Medium_Lowland	PAN2423	120	4	2016-08-09	2016	rice	0	451.2	0	?	0	26.03	0.477	1	1	1	0.988	?	?	?	?	270.7	8	9.682	9.241	9.045	8.784	8.131	8	8	8	8	8	8	8	190.346	0	0	0	0	0.1
								Medium_Lowland	PAN2423	120	4	2016-08-10	2016	rice	0	468.5	0	?	0	64.9	0.493	1	1	1	1	?	?	?	?	281.1	8	9.828	9.185	9.007	8.77	8.178	8	8	8	8	8	8	8	244.55	0	0	0	0	0.1
								Medium_Lowland	PAN2423	120	4	2016-08-11	2016	rice	0	554.3	0	?	0	18.08	0.51	1	1	0	0.978	?	?	?	?	332.6	8	7.461	8.316	8.271	8.211	8.06	8	8	8	8	8	8	8	252.574	0	0	0	0	0.1
								Medium_Lowland	PAN2423	120	4	2016-08-12	2016	rice	0	666.3	0	?	0	11.77	0.527	1	1	0	0.968	?	?	?	?	398.5	8	9.516	9.623	9.401	9.106	8.369	8	8	8	8	8	8	8	251.333	0	0	0	0	0.1
								Medium_Lowland	PAN2423	120	4	2016-08-13	2016	rice	0	790.3	0	?	0	2.7	0.543	1	1	0	0.956	?	?	?	?	468.8	8	10.151	10.325	10.022	9.618	8.607	8	8	8	8	8	8	8	239.415	0	0	0	0	0.1
								Medium_Lowland	PAN2423	120	4	2016-08-14	2016	rice	0	923.5	0	?	0	6.01	0.56	1	1	0	0.958	?	?	?	?	541.9	8	11.366	11.083	10.698	10.184	8.899	8	8	8	8	8	8	8	229.441	0	0	0	0	0.1
								Medium_Lowland	PAN2423	120	4	2016-08-15	2016	rice	0	1063	0	?	0	16.46	0.577	1	1	0	0.966	?	?	?	?	615.4	8	11.898	11.417	11.007	10.46	9.093	8	8	8	8	8	8	8	229.909	0	0	0	0	0.1
								Medium_Lowland	PAN2423	120	4	2016-08-16	2016	rice	0	1207.3	0	?	0	7.59	0.594	1	1	0	0.973	?	?	?	?	688.6	8	11.87	11.445	11.047	10.517	9.192	8	8	8	8	8	8	8	222.038	0	0	0	0	0
								Medium_Lowland	PAN2423	120	4	2016-08-17	2016	rice	0	1304.2	0	?	0	28.62	0.611	1	1	0	0.991	?	?	?	?	735.8	8	12.758	11.562	11.167	10.639	9.319	8	8	8	8	8	8	8	236.247	0	0	0	0	0
								Medium_Lowland	PAN2423	120	4	2016-08-18	2016	rice	0	1456.6	0	?	0	16.36	0.628	1	1	0	0.989	?	?	?	?	806.9	8	9.449	9.85	9.652	9.388	8.727	8	8	8	8	8	8	8	240.505	0	0	0	0	0
								Medium_Lowland	PAN2423	120	4	2016-08-19	2016	rice	0	1615.5	0	?	0	4.1	0.645	1	1	0	0.991	?	?	?	?	877.8	8	11.727	11.389	11.038	10.571	9.402	8	8	8	8	8	8	8	230.382	0	0	0	0	0
								Medium_Lowland	PAN2423	120	4	2016-08-20	2016	rice	0	1809.2	0	?	0	3.55	0.661	1	1	0	0.979	?	?	?	?	960.4	8	11.185	11.363	11.026	10.578	9.457	8	8	8	8	8	8	8	219.454	0	0	0	0	0
								Medium_Lowland	PAN2423	120	4	2016-08-21	2016	rice	0	1913.3	0	?	0	77.37	0.68	1	1	0	0.993	?	?	?	?	1002.8	8	14.147	12.815	12.349	11.728	10.175	8	8	8	8	8	8	8	281.411	0	0	0	0	0
								Medium_Lowland	PAN2423	120	4	2016-08-22	2016	rice	0	2065.4	0	?	0	48.45	0.7	1	1	0	0.992	?	?	?	?	1061.1	8	9.676	9.758	9.594	9.374	8.824	8	8	8	8	8	8	8	299.237	0	0	0	0	0
								Medium_Lowland	PAN2423	120	4	2016-08-23	2016	rice	0	2296.9	0	?	0	3.36	0.719	1	1	0	0.984	?	?	?	?	1144.5	8	9.973	10.556	10.324	10.014	9.239	8	8	8	8	8	8	8	289.546	0	0	0	0	0
								Medium_Lowland	PAN2423	120	4	2016-08-24	2016	rice	0	2533.9	0	?	0	3.21	0.739	1	1	0	0.992	?	?	?	?	1224.3	8	13.789	13.234	12.772	12.156	10.617	8	8	8	8	8	8	8	276.308	0	0	0	0	0
								Medium_Lowland	PAN2423	120	4	2016-08-25	2016	rice	0	2745	0	?	0	4.03	0.758	1	1	0	0.993	?	?	?	?	1290.4	8	13.138	12.614	12.219	11.691	10.373	8	8	8	8	8	8	8	265.084	0	0	0	0	0
								Medium_Lowland	PAN2423	120	4	2016-08-26	2016	rice	0	3001.5	0	?	0	5.2	0.778	1	1	0	0.991	?	?	?	?	1364.9	8	11.721	11.826	11.508	11.082	10.02	8	8	8	8	8	8	8	255.837	0	0	0	0	0
								Medium_Lowland	PAN2423	120	4	2016-08-27	2016	rice	0	3261	0	?	0	2.49	0.798	1	1	0	0.987	?	?	?	?	1434.1	8	13.366	13.222	12.799	12.234	10.823	8	8	8	8	8	8	8	241.923	0	0	0	0	0
								Medium_Lowland	PAN2423	120	4	2016-08-28	2016	rice	0	3511.4	0	?	0	0.36	0.818	1	1	0	0.993	?	?	?	?	1494.9	8	14.637	13.965	13.481	12.836	11.224	8	8	8	8	8	8	8	225.289	0	0	0	0	0
								Medium_Lowland	PAN2423	120	4	2016-08-29	2016	rice	0	3764.3	0	?	0	4.15	0.837	1	1	0	0.993	?	?	?	?	1550.3	8	12.863	12.642	12.265	11.764	10.509	8	8	8	8	8	8	8	214.196	0	0	0	0	0
								Medium_Lowland	PAN2423	120	4	2016-08-30	2016	rice	0	4035.2	0	?	0	0.37	0.857	1	1	0	0.989	?	?	?	?	1603.2	8	12.874	12.859	12.465	11.94	10.627	8	8	8	8	8	8	8	198.812	0	0	0	0	0
								Medium_Lowland	PAN2423	120	4	2016-08-31	2016	rice	0	4153.9	0	?	0	7.96	0.877	1	1	0	0.997	?	?	?	?	1623.6	8	15.145	14.016	13.528	12.878	11.252	8	8	8	8	8	8	8	190.464	0	0	0	0	0
								Medium_Lowland	PAN2423	120	4	2016-09-01	2016	rice	0	4390.4	0	?	0	3.67	0.897	1	1	0	0.993	?	?	?	?	1658.5	8	9.697	9.905	9.75	9.544	9.03	8	8	8	8	8	8	8	182.765	0	0	0	0	0
								Medium_Lowland	PAN2423	120	4	2016-09-02	2016	rice	0	4637.4	0	?	0	7.22	0.917	1	1	0	0.993	?	?	?	?	1689	8	12.064	11.9	11.583	11.162	10.108	8	8	8	8	8	8	8	175.962	0	0	0	0	0
								Medium_Lowland	PAN2423	120	4	2016-09-03	2016	rice	0	4790.5	0	?	0	18.11	0.937	1	1	0	0.995	?	?	?	?	1704.2	8	12.685	12.106	11.773	11.33	10.22	8	8	8	8	8	8	8	180.195	0	0	0	0	0
								Medium_Lowland	PAN2423	120	4	2016-09-04	2016	rice	0	5040	0	?	0	19.21	0.957	1	1	0	0.993	?	?	?	?	1723	8	10.059	10.265	10.081	9.837	9.224	8	8	8	8	8	8	8	187.547	0	0	0	0	0
								Medium_Lowland	PAN2423	120	4	2016-09-05	2016	rice	0	5268.7	113.8	?	0	38.61	0.977	1	1	0	0.993	?	?	?	?	1734.7	8	12.254	11.974	11.652	11.222	10.148	8	8	8	8	8	8	8	212.128	0	0	0	0	0
								Medium_Lowland	PAN2423	120	4	2016-09-06	2016	rice	0	5422.5	197.6	?	0	17.35	0.997	1	1	0	0.994	?	?	?	?	1738.9	8	12.146	11.683	11.384	10.986	9.991	8	8	8	8	8	8	8	216.144	0	0	0	0	0
								Medium_Lowland	PAN2423	120	4	2016-09-07	2016	rice	0	5643.8	328.8	?	0	3.6	1.016	1	1	0	0.993	?	?	?	?	1739.7	8	10.171	10.286	10.1	9.853	9.235	8	8	8	8	8	8	8	207.945	0	0	0	0	0
								Medium_Lowland	PAN2423	120	4	2016-09-08	2016	rice	0	5876.5	514.9	?	0	2.62	1.046	1	1	0	0.993	?	?	?	?	1739.7	8	11.508	11.546	11.258	10.875	9.917	8	8	8	8	8	8	8	196.885	0	0	0	0	0
								Medium_Lowland	PAN2423	120	4	2016-09-09	2016	rice	0	6103	711.5	?	0	2.04	1.077	1	1	0	0.993	?	?	?	?	1739.7	8	12.802	12.532	12.165	11.675	10.45	8	8	8	8	8	8	8	183.974	0	0	0	0	0
								Medium_Lowland	PAN2423	120	4	2016-09-10	2016	rice	0	6331.6	923.9	?	0	1.95	1.107	1	1	0	0.993	?	?	?	?	1739.7	8	12.45	12.402	12.046	11.57	10.38	8	8	8	8	8	8	8	170.946	0	0	0	0	0
								Medium_Lowland	PAN2423	120	4	2016-09-11	2016	rice	0	6540.2	1133.7	?	0	8.4	1.136	1	1	0	0.993	?	?	?	?	1739.7	8	13.781	13.203	12.781	12.219	10.812	8	8	8	8	8	8	8	163.608	0	0	0	0	0
								Medium_Lowland	PAN2423	120	4	2016-09-12	2016	rice	0	6715.6	1326.2	?	0	14.9	1.166	1	1	0	0.993	?	?	?	?	1739.7	8	12.258	11.901	11.584	11.163	10.108	8	8	8	8	8	8	8	164.621	0	0	0	0	0
								Medium_Lowland	PAN2423	120	4	2016-09-13	2016	rice	0	6893.8	1531	?	0	7.73	1.195	1	1	0	0.993	?	?	?	?	1739.7	8	11.422	11.252	10.988	10.636	9.758	8	8	8	8	8	8	8	159.307	0	0	0	0	0
								Medium_Lowland	PAN2423	120	4	2016-09-14	2016	rice	0	7093	1765.5	?	0	5.05	1.225	1	1	0	0.993	?	?	?	?	1739.7	8	11.078	11.253	10.99	10.638	9.759	8	8	8	8	8	8	8	150.955	0	0	0	0	0
								Medium_Lowland	PAN2423	120	4	2016-09-15	2016	rice	0	7284.1	1990.5	?	0	1.98	1.255	0.954	0.994	0	0.993	?	?	?	?	1739.7	8	13.007	12.714	12.332	11.822	10.548	8	8	8	8	8	8	8	137.641	0	0	0	0	0
								Medium_Lowland	PAN2423	120	4	2016-09-16	2016	rice	0	7474.2	2211	?	0	1.87	1.285	0.954	0.994	0	0.993	?	?	?	?	1739.7	8	12.715	12.524	12.157	11.668	10.446	8	8	8	8	8	8	8	124.406	0	0	0	0	0
								Medium_Lowland	PAN2423	120	4	2016-09-17	2016	rice	0	7588.9	2353.2	?	0	11.93	1.315	0.954	0.994	0	0.994	?	?	?	?	1739.7	8	13.538	12.719	12.337	11.826	10.551	8	8	8	8	8	8	8	121.577	0	0	0	0	0
								Medium_Lowland	PAN2423	120	4	2016-09-18	2016	rice	0	7759.8	2548.8	?	0	1.71	1.345	0.954	0.994	0	0.993	?	?	?	?	1739.7	8	9.889	10.157	9.982	9.749	9.166	8	8	8	8	8	8	8	111.479	0	0	0	0	0
								Medium_Lowland	PAN2423	120	4	2016-09-19	2016	rice	0	7933.6	2744.8	?	0	2.51	1.375	0.954	0.994	0	0.993	?	?	?	?	1739.7	8	11.894	11.917	11.599	11.176	10.117	8	8	8	8	8	8	8	99.61	0	0	0	0	0
								Medium_Lowland	PAN2423	120	4	2016-09-20	2016	rice	0	8102.1	2933.4	?	0	1.32	1.405	0.954	0.994	0	0.993	?	?	?	?	1739.7	8	13.115	12.841	12.449	11.925	10.617	8	8	8	8	8	8	8	85.331	0	0	0	0	0
								Medium_Lowland	PAN2423	120	4	2016-09-21	2016	rice	0	8244.4	3093.6	?	0	13.71	1.435	0.954	0.994	0	0.993	?	?	?	?	1739.7	8	13.43	12.754	12.368	11.854	10.57	8	8	8	8	8	8	8	83.967	0	0	0	0	0
								Medium_Lowland	PAN2423	120	4	2016-09-22	2016	rice	0	8396.3	3261.7	?	0	7.32	1.465	0.954	0.994	0	0.993	?	?	?	?	1739.7	8	11.021	11.036	10.79	10.462	9.641	8	8	8	8	8	8	8	78.311	0	0	0	0	0
								Medium_Lowland	PAN2423	120	4	2016-09-23	2016	rice	0	8536.6	3416.6	?	0	10.47	1.495	0.954	0.994	0	0.993	?	?	?	?	1739.7	8	12.015	11.722	11.421	11.018	10.012	8	8	8	8	8	8	8	74.975	0	0	0	0	0
								Medium_Lowland	PAN2423	120	4	2016-09-24	2016	rice	0	8659.8	3552.9	?	0	9.53	1.524	0.954	0.994	0	0.993	?	?	?	?	1739.7	8	11.66	11.329	11.059	10.699	9.799	8	8	8	8	8	8	8	71.368	0	0	0	0	0
								Medium_Lowland	PAN2423	120	4	2016-09-25	2016	rice	0	8764.2	3669.1	?	0	8.01	1.554	0.954	0.994	0	0.993	?	?	?	?	1739.7	8	10.953	10.708	10.488	10.196	9.464	8	8	8	8	8	8	8	67.162	0	0	0	0	0
								Medium_Lowland	PAN2423	120	4	2016-09-26	2016	rice	0	8861.9	3777.5	?	0	8.03	1.584	0.954	0.994	0	0.993	?	?	?	?	1739.7	8	10.45	10.301	10.114	9.866	9.244	8	8	8	8	8	8	8	63.551	0	0	0	0	0
								Medium_Lowland	PAN2423	120	4	2016-09-27	2016	rice	0	8980.7	3905.8	?	0	2.75	1.614	0.954	0.994	0	0.993	?	?	?	?	1739.7	8	9.742	10.142	9.968	9.737	9.158	8	8	8	8	8	8	8	54.341	0	0	0	0	0
								Medium_Lowland	PAN2423	120	4	2016-09-28	2016	rice	0	9060.2	3994	?	0	13.81	1.643	0.954	0.994	0	0.995	?	?	?	?	1739.7	8	12.839	12.101	11.769	11.326	10.217	8	8	8	8	8	8	8	54.124	0	0	0	0	0
								Medium_Lowland	PAN2423	120	4	2016-09-29	2016	rice	0	9160.2	4101.7	?	0	3.98	1.673	0.954	0.994	0	0.993	?	?	?	?	1739.7	8	9.645	9.862	9.711	9.51	9.006	8	8	8	8	8	8	8	46.696	0	0	0	0	0
								Medium_Lowland	PAN2423	120	4	2016-09-30	2016	rice	0	9257.5	4205.9	?	0	2.07	1.703	0.954	0.994	0	0.993	?	?	?	?	1739.7	8	11.072	11.163	10.906	10.564	9.709	8	8	8	8	8	8	8	35.311	0	0	0	0	0
								Medium_Lowland	PAN2423	120	4	2016-10-01	2016	rice	0	9347.3	4302	?	0	4.99	1.733	0.954	0.994	0	0.993	?	?	?	?	1739.7	8	12.305	11.968	11.646	11.217	10.145	8	8	8	8	8	8	8	25.836	0	0	0	0	0
								Medium_Lowland	PAN2423	120	4	2016-10-02	2016	rice	0	9429	4389.4	?	0	2.94	1.764	0.954	0.994	0	0.993	?	?	?	?	1739.7	8	11.64	11.43	11.152	10.781	9.854	8	8	8	8	8	8	8	15.039	0	0	0	0	0
								Medium_Lowland	PAN2423	120	4	2016-10-03	2016	rice	0	9506.3	4471.7	?	0	0.72	1.792	0.954	0.994	0	0.993	?	?	?	?	1739.7	8	11.222	11.232	10.97	10.621	9.747	8	8	8	8	8	8	8	2.075	0	0	0	0	0
								Medium_Lowland	PAN2423	120	4	2016-10-04	2016	rice	0	9575.6	4545.6	?	0	1.11	1.822	0.954	0.994	0	0.993	?	?	?	?	1739.7	6.96	2.502	1.698	1.399	1.14	2.5	4.8	6.96	6.96	6.96	6.96	6.96	6.96	0	0	0	0	0	0
								Medium_Lowland	PAN2423	120	4	2016-10-05	2016	rice	0	9625.3	4599.5	?	0	3.49	1.852	0.954	0.994	0	0.981	?	?	?	?	1739.7	6.96	2.833	2.644	2.382	1.894	1.832	3.116	6.96	6.96	6.96	6.96	6.96	6.96	0	0	0	0	0	0
								Medium_Lowland	PAN2423	120	4	2016-10-06	2016	rice	0	9715.7	4693.5	?	0	9.69	1.882	0.954	0.994	0	0.993	?	?	?	?	1739.7	6.029	9.336	9.264	9.135	8.964	5.368	3.675	6.029	6.029	6.029	6.029	6.029	6.029	0	0	0	0	0	0
								Medium_Lowland	PAN2423	120	4	2016-10-07	2016	rice	0	9800.4	4781.5	?	0	6.55	1.912	0.954	0.994	0	0.999	?	?	?	?	1739.7	4.963	5.903	5.737	5.507	5.201	4.434	3.365	4.963	4.963	4.963	4.963	4.963	4.963	0	0	0	0	0	0
								Medium_Lowland	PAN2423	120	4	2016-10-08	2016	rice	0	9888.9	4873	?	0	8.91	1.942	0.954	0.994	0	0.998	?	?	?	?	1739.7	4.859	8.487	8.396	8.259	8.077	7.621	4.703	4.859	4.859	4.859	4.859	4.859	4.859	0	0	0	0	0	0
								Medium_Lowland	PAN2423	120	4	2016-10-09	2016	rice	0	9974.7	4961.6	?	0	4.54	1.971	0.954	0.994	0.539	0.999	?	?	?	?	1739.7	4.423	4.095	4.007	3.873	3.696	3.252	3.768	4.423	4.423	4.423	4.423	4.423	4.423	0	0	0	0	0	0
								Medium_Lowland	PAN2423	120	4	2016-10-10	2016	rice	0	10057.7	5047	?	0	12.73	2	0.954	0.994	0.976	1	?	?	?	?	1739.7	4.574	12.34	12.261	12.142	11.983	11.585	4.8	4.574	4.574	4.574	4.574	4.574	4.574	0	0	0	0	0	0
								Medium_Lowland	PAN2423	120	4	2016-10-11	2016	rice	0	10147.4	5138.9	?	0	6.79	2.03	0.954	0.994	1	0.997	?	?	?	?	1739.7	4.664	6.412	6.341	6.233	6.091	5.733	4.8	4.664	4.664	4.664	4.664	4.664	4.664	0	0	0	0	0	0
								Medium_Lowland	PAN2423	120	4	2016-10-12	2016	rice	0	10249.9	5243.3	?	0	4.17	2.059	0.954	0.994	1	0.993	?	?	?	?	1739.7	4.719	3.635	3.608	3.482	3.314	2.894	4.8	4.719	4.719	4.719	4.719	4.719	4.719	0	0	0	0	0	0
								Medium_Lowland	PAN2423	120	4	2016-10-13	2016	rice	0	10354.1	5349.4	?	0	0.92	2.087	0.954	0.994	1	0.993	?	?	?	?	1739.7	4.512	0.092	0.57	0.855	1.14	2.5	4.203	4.512	4.512	4.512	4.512	4.512	4.512	0	0	0	0	0	0
								Medium_Lowland	PAN2423	120	4	2016-10-14	2016	rice	0	10455.6	5452.5	?	0	0.04	2.114	0.954	0.994	1	0.929	?	?	?	?	1739.7	4.05	-0.61	0.185	0.628	1.075	1.766	2.726	3.798	4.05	4.05	4.05	4.05	4.05	0	0	0	0	0	0
								Medium_Lowland	PAN2423	120	4	2016-10-15	2016	rice	0	10555.6	5553.8	?	0	0.01	2.14	0.954	0.994	1	0.803	?	?	?	?	1739.7	4.05	-0.558	-0.746	0.223	0.529	0.847	1.493	2.876	4.05	4.05	4.05	4.05	4.05	0	0	0	0	0	0
								Medium_Lowland	PAN2423	120	4	2016-10-16	2016	rice	0	10653.2	5652.7	?	0	0	2.167	0.954	0.994	1	0.708	?	?	?	?	1739.7	4.05	-0.835	-0.505	-0.738	0.147	0.203	0.507	1.928	4.05	4.05	4.05	4.05	4.05	0	0	0	0	0	0
								Medium_Lowland	PAN2423	120	4	2016-10-17	2016	rice	0	10747.7	5748.4	?	0	0	2.193	0.954	0.994	1	0.649	?	?	?	?	1739.7	4.05	-0.758	-0.759	-0.434	-0.75	-0.159	-0.236	1.157	3.332	4.05	4.05	4.05	4.05	0	0	0	0	0	0
								Medium_Lowland	PAN2423	120	4	2016-10-18	2016	rice	0	10841.7	5843.5	?	0	0	2.22	0.954	0.994	1	0.604	?	?	?	?	1739.7	4.05	-0.901	-0.731	-0.74	-0.573	-0.214	-0.245	0.6	2.513	4.05	4.05	4.05	4.05	0	0	0	0	0	0
								Medium_Lowland	PAN2423	120	4	2016-10-19	2016	rice	0	10933.5	5936.2	?	0	0	2.248	0.954	0.994	1	0.555	?	?	?	?	1739.7	4.05	-0.815	-0.74	-0.71	-0.408	-0.2	-0.274	0.262	1.837	3.925	4.05	4.05	4.05	0	0	0	0	0	0
								Medium_Lowland	PAN2423	120	4	2016-10-20	2016	rice	0	11021.8	6025.3	?	0	0	2.274	0.954	0.994	1	0.509	?	?	?	?	1739.7	4.05	-0.762	-0.646	-0.597	-0.335	-0.181	-0.3	0.047	1.3	3.137	4.05	4.05	4.05	0	0	0	0	0	0
								Medium_Lowland	PAN2423	120	4	2016-10-21	2016	rice	0	11107.7	6112	?	0	0	2.3	0.954	0.994	1	0.468	?	?	?	?	1739.7	4.05	-0.703	-0.52	-0.368	-0.237	-0.172	-0.315	-0.292	0.91	2.469	4.05	4.05	4.05	0	0	0	0	0	0
								Medium_Lowland	PAN2423	120	4	2016-10-22	2016	rice	0	11187.9	6192.9	?	0	0	2.327	0.954	0.994	1	0.432	?	?	?	?	1739.7	4.05	-0.493	-0.377	-0.255	-0.162	-0.162	-0.336	-0.246	0.55	1.893	3.832	4.05	4.05	0	0	0	0	0	0
								Medium_Lowland	PAN2423	120	4	2016-10-23	2016	rice	0	11264.4	6270	?	0	0	2.353	0.954	0.994	1	0.401	?	?	?	?	1739.7	4.05	-0.351	-0.285	-0.194	-0.138	-0.132	-0.351	-0.219	0.311	1.419	3.108	4.05	4.05	0	0	0	0	0	0
								Medium_Lowland	PAN2423	120	4	2016-10-24	2016	rice	0	11342.9	6297.7	?	0	0	2.377	0.954	0.994	1	0.375	?	?	?	?	1739.7	4.05	-0.267	-0.226	-0.16	-0.118	-0.107	-0.358	-0.204	0.152	1.039	2.487	4.05	4.05	0	0	0	0	0	0
								Medium_Lowland	PAN2423	120	4	2016-10-25	2016	rice	0	11423.4	6297.7	?	0	0	2.401	0.954	0.994	1	0.354	?	?	?	?	1739.7	3.822	-0.214	-0.188	-0.138	-0.104	-0.091	-0.358	-0.196	0.045	0.741	1.963	3.822	3.822	0	0	0	0	0	0
								Medium_Lowland	PAN2423	120	4	2016-10-26	2016	rice	0	11482.8	6297.7	?	0	5.05	2.426	0.954	0.994	1	0.396	?	?	?	?	1739.7	3.135	2.794	1.447	0.636	0.022	-0.071	-0.357	-0.191	0	0.518	1.53	3.135	3.135	0	0	0	0	0	0
								Medium_Lowland	PAN2423	120	4	2016-10-27	2016	rice	0	11555.9	6297.7	?	0	22.43	2.455	0.954	0.994	1	0.724	?	?	?	?	1739.7	2.548	21.571	19.733	16.046	11.137	3.853	-0.295	-0.185	0	0.363	1.18	2.548	2.548	0	0	0	0	0	0
								Medium_Lowland	PAN2423	120	4	2016-10-28	2016	rice	0	11622.5	6297.7	?	0	1.95	2.483	0.954	0.994	1	0.72	?	?	?	?	1739.7	2.054	1.275	1.09	1.015	1.14	1.665	-0.248	-0.178	0	0.254	0.902	2.054	2.054	0	0	0	0	0	0
								Medium_Lowland	PAN2423	120	4	2016-10-29	2016	rice	0	11701.2	6297.7	?	0	1.73	2.511	0.954	0.994	1	0.731	?	?	?	?	1739.7	1.643	0.741	1.015	0.95	1.14	1.096	-0.21	-0.171	0	0.178	0.685	1.643	1.643	0	0	0	0	0	0
								Medium_Lowland	PAN2423	120	4	2016-10-30	2016	fallow	0	0	0	?	0	1.46	0	1	1	1	1	?	?	?	?	0	1.35	-0.729	0.57	0.855	1.14	0.887	-0.185	-0.164	0	0.124	0.517	1.305	1.35	0	0	0	0	0	0
								Medium_Lowland	PAN2423	120	4	2016-10-31	2016	fallow	0	0	0	?	0	0.63	0	1	1	1	1	?	?	?	?	0	1.35	-0.953	-1.202	0.669	1.024	0.88	-0.13	-0.156	0	0.087	0.388	1.03	1.35	0	0	0	0	0	0
								Medium_Lowland	PAN2423	120	4	2016-11-01	2016	fallow	0	0	0	?	0	1.26	0	1	1	1	1	?	?	?	?	0	1.35	-0.985	-0.591	-0.85	0.512	0.542	-0.091	-0.147	0	0.061	0.29	0.808	1.35	0	0	0	0	0	0
								Medium_Lowland	PAN2423	120	4	2016-11-02	2016	fallow	0	0	0	?	0	0.02	0	1	1	1	1	?	?	?	?	0	1.267	-1.012	-0.947	-0.541	-0.544	0.022	-0.087	-0.14	0	0.043	0.216	0.63	1.267	0	0	0	0	0	0
								Medium_Lowland	PAN2423	120	4	2016-11-03	2016	fallow	0	0	0	?	0	12.56	0	1	1	1	1	?	?	?	?	0	1.034	9.457	9.137	6.747	4.132	1.706	0.339	-0.121	0	0.03	0.16	0.489	1.034	0	0	0	0	0	0
								Medium_Lowland	PAN2423	120	4	2016-11-04	2016	fallow	0	0	0	?	0	16.73	0	1	1	1	1	?	?	?	?	0	0.837	15.091	14.26	14.26	14.26	10.966	4.59	1.596	0.016	0.026	0.12	0.378	0.837	0	0	0	0	0	0
								Medium_Lowland	PAN2423	120	4	2016-11-05	2016	fallow	0	0	0	?	0	27.53	0	1	1	1	1	?	?	?	?	0	0.688	17.625	17.115	17.115	17.115	17.115	12	5.758	1.738	0.539	0.246	0.339	0.688	0	0	0	0	0	0
								Medium_Lowland	PAN2423	120	4	2016-11-06	2016	fallow	0	0	0	?	0	0.96	0	1	1	1	1	?	?	?	?	0	0.601	-1.093	0.57	0.855	1.14	2.5	4.8	5.375	2.829	1.226	0.54	0.399	0.601	0	0	0	0	0	0
								Medium_Lowland	PAN2423	120	4	2016-11-07	2016	fallow	0	0	0	?	0	0.34	0	1	1	1	1	?	?	?	?	0	0.59	-0.989	-1.369	0.713	1.14	2.39	4.8	5.145	3.524	1.916	0.953	0.565	0.59	0	0	0	0	0	0
								Medium_Lowland	PAN2423	120	4	2016-11-08	2016	fallow	0	0	0	?	0	0	0	1	1	1	1	?	?	?	?	0	0.659	-1.115	-0.669	-1.081	0.784	1.587	3.551	4.507	3.819	2.487	1.413	0.819	0.659	0	0	0	0	0	0
								Medium_Lowland	PAN2423	120	4	2016-11-09	2016	fallow	0	0	0	?	0	0	0	1	1	1	1	?	?	?	?	0	0.8	-0.967	-1.013	-0.579	-0.813	0.793	2.448	3.683	3.778	2.874	1.851	1.129	0.8	0	0	0	0	0	0
								Medium_Lowland	PAN2423	120	4	2016-11-10	2016	fallow	0	0	0	?	0	0	0	1	1	1	1	?	?	?	?	0	0.996	-0.982	-0.821	-0.817	-0.584	-0.482	1.469	2.798	3.484	3.057	2.213	1.454	0.996	0	0	0	0	0	0
								Medium_Lowland	PAN2423	120	4	2016-11-11	2016	fallow	0	0	0	?	0	0	0	1	1	1	1	?	?	?	?	0	1.224	-0.928	-0.884	-0.755	-0.677	-0.306	0.688	1.954	3.025	3.047	2.463	1.757	1.224	0	0	0	0	0	0
								Medium_Lowland	PAN2423	120	4	2016-11-12	2016	fallow	0	0	0	?	0	0	0	1	1	1	1	?	?	?	?	0	1.35	-0.913	-0.85	-0.776	-0.642	-0.285	0.291	1.289	2.504	2.884	2.59	2.007	1.35	0	0	0	0	0	0
								Medium_Lowland	PAN2423	120	4	2016-11-13	2016	fallow	0	0	0	?	0	0	0	1	1	1	1	?	?	?	?	0	1.35	-0.892	-0.846	-0.758	-0.623	-0.303	0.06	0.797	1.992	2.617	2.598	2.184	1.35	0	0	0	0	0	0
								Medium_Lowland	PAN2423	120	4	2016-11-14	2016	fallow	0	0	0	?	0	0	0	1	1	1	1	?	?	?	?	0	2.128	-0.877	-0.829	-0.741	-0.616	-0.317	-0.166	0.478	1.538	2.293	2.506	2.281	2.128	0	0	0	0	0	0
								Medium_Lowland	PAN2423	120	4	2016-11-15	2016	fallow	0	0	0	?	0	0	0	1	1	1	1	?	?	?	?	0	2.298	-0.276	-0.462	-0.528	-0.468	-0.322	-0.152	0.221	1.143	1.948	2.339	2.298	2.298	0	0	0	0	0	0
								Medium_Lowland	PAN2423	120	4	2016-11-16	2016	fallow	0	0	0	?	0	0	0	1	1	1	1	?	?	?	?	0	2.245	-0.383	-0.441	-0.452	-0.415	-0.314	-0.149	0.072	0.821	1.61	2.12	2.245	2.245	0	0	0	0	0	0
								Medium_Lowland	PAN2423	120	4	2016-11-17	2016	fallow	0	0	0	?	0	0	0	1	1	1	1	?	?	?	?	0	2.133	-0.363	-0.399	-0.406	-0.38	-0.303	-0.15	-0.192	0.575	1.299	1.874	2.133	2.133	0	0	0	0	0	0
								Medium_Lowland	PAN2423	120	4	2016-11-18	2016	fallow	0	0	0	?	0	0	0	1	1	1	1	?	?	?	?	0	1.978	-0.339	-0.366	-0.372	-0.352	-0.291	-0.161	0	0.345	1.013	1.616	1.978	1.978	0	0	0	0	0	0
								Medium_Lowland	PAN2423	120	4	2016-11-19	2016	fallow	0	0	0	?	0	0	0	1	1	1	1	?	?	?	?	0	1.794	-0.318	-0.34	-0.345	-0.33	-0.281	-0.159	-0.201	0.241	0.782	1.365	1.794	1.794	0	0	0	0	0	0
								Medium_Lowland	PAN2423	120	4	2016-11-20	2016	fallow	0	0	0	?	0	0	0	1	1	1	1	?	?	?	?	0	1.595	-0.302	-0.319	-0.324	-0.311	-0.271	-0.168	-0.184	0.109	0.58	1.13	1.595	1.595	0	0	0	0	0	0
								Medium_Lowland	PAN2423	120	4	2016-11-21	2016	fallow	0	0	0	?	0	0	0	1	1	1	1	?	?	?	?	0	1.391	-0.288	-0.302	-0.306	-0.296	-0.262	-0.175	-0.174	0.021	0.412	0.914	1.391	1.391	0	0	0	0	0	0
								Medium_Lowland	PAN2423	120	4	2016-11-22	2016	fallow	0	0	0	?	0	0	0	1	1	1	1	?	?	?	?	0	1.35	-0.276	-0.288	-0.291	-0.283	-0.255	-0.179	-0.166	0	0.288	0.727	1.192	1.35	0	0	0	0	0	0
								Medium_Lowland	PAN2423	120	4	2016-11-23	2016	fallow	0	0	0	?	0	0	0	1	1	1	1	?	?	?	?	0	1.35	-0.265	-0.276	-0.279	-0.272	-0.249	-0.183	-0.159	0	0.202	0.569	1.005	1.35	0	0	0	0	0	0
								Medium_Lowland	PAN2423	120	4	2016-11-24	2016	fallow	0	0	0	?	0	0	0	1	1	1	1	?	?	?	?	0	1.35	-0.256	-0.265	-0.268	-0.262	-0.243	-0.185	-0.152	0	0.141	0.441	0.836	1.35	0	0	0	0	0	0
								Medium_Lowland	PAN2423	120	4	2016-11-25	2016	fallow	0	0	0	?	0	0	0	1	1	1	1	?	?	?	?	0	1.251	-0.248	-0.256	-0.259	-0.254	-0.238	-0.186	-0.146	0	0.099	0.338	0.686	1.251	0	0	0	0	0	0
								Medium_Lowland	PAN2423	120	4	2016-11-26	2016	fallow	0	0	0	?	0	0	0	1	1	1	1	?	?	?	?	0	1.043	-0.24	-0.248	-0.25	-0.247	-0.233	-0.186	-0.141	0	0.069	0.258	0.558	1.043	0	0	0	0	0	0
								Medium_Lowland	PAN2423	120	4	2016-11-27	2016	fallow	0	0	0	?	0	0	0	1	1	1	1	?	?	?	?	0	0.865	-0.233	-0.24	-0.243	-0.24	-0.229	-0.186	-0.136	0	0.048	0.195	0.449	0.865	0	0	0	0	0	0
								Medium_Lowland	PAN2423	120	4	2016-11-28	2016	fallow	0	0	0	?	0	0	0	1	1	1	1	?	?	?	?	0	0.713	-0.227	-0.234	-0.236	-0.234	-0.225	-0.185	-0.131	0	0.034	0.147	0.358	0.713	0	0	0	0	0	0
								Medium_Lowland	PAN2423	120	4	2016-11-29	2016	fallow	0	0	0	?	0	0	0	1	1	1	1	?	?	?	?	0	0.584	-0.222	-0.228	-0.23	-0.229	-0.221	-0.184	-0.127	0	0.024	0.11	0.284	0.584	0	0	0	0	0	0
								Medium_Lowland	PAN2423	120	4	2016-11-30	2016	fallow	0	0	0	?	0	0	0	1	1	1	1	?	?	?	?	0	0.476	-0.216	-0.222	-0.225	-0.224	-0.217	-0.183	-0.123	0	0.017	0.082	0.223	0.476	0	0	0	0	0	0
								Medium_Lowland	PAN2423	120	4	2016-12-01	2016	fallow	0	0	0	?	0	0	0	1	1	1	1	?	?	?	?	0	0.385	-0.211	-0.217	-0.22	-0.219	-0.214	-0.181	-0.12	0	0.012	0.061	0.174	0.385	0	0	0	0	0	0
								Medium_Lowland	PAN2423	120	4	2016-12-02	2016	fallow	0	0	0	?	0	0	0	1	1	1	1	?	?	?	?	0	0.31	-0.207	-0.212	-0.215	-0.215	-0.21	-0.179	-0.117	0	0.008	0.045	0.136	0.31	0	0	0	0	0	0
								Medium_Lowland	PAN2423	120	4	2016-12-03	2016	fallow	0	0	0	?	0	0	0	1	1	1	1	?	?	?	?	0	0.249	-0.203	-0.208	-0.211	-0.211	-0.207	-0.177	-0.114	0	0.006	0.033	0.105	0.249	0	0	0	0	0	0
								Medium_Lowland	PAN2423	120	4	2016-12-04	2016	fallow	0	0	0	?	0	0	0	1	1	1	1	?	?	?	?	0	0.198	-0.199	-0.203	-0.207	-0.207	-0.204	-0.175	-0.111	-0.003	0.004	0.024	0.081	0.198	0	0	0	0	0	0
								Medium_Lowland	PAN2423	120	4	2016-12-05	2016	fallow	0	0	0	?	0	0	0	1	1	1	1	?	?	?	?	0	0.157	-0.195	-0.2	-0.203	-0.203	-0.2	-0.173	-0.108	-0.006	0.002	0.018	0.062	0.157	0	0	0	0	0	0
								Medium_Lowland	PAN2423	120	4	2016-12-06	2016	fallow	0	0	0	?	0	0	0	1	1	1	1	?	?	?	?	0	0.124	-0.191	-0.196	-0.199	-0.199	-0.197	-0.171	-0.106	-0.009	0	0.012	0.047	0.124	0	0	0	0	0	0
								Medium_Lowland	PAN2423	120	4	2016-12-07	2016	fallow	0	0	0	?	0	0	0	1	1	1	1	?	?	?	?	0	0.098	-0.188	-0.192	-0.195	-0.196	-0.194	-0.168	-0.104	-0.012	0	0.009	0.035	0.098	0	0	0	0	0	0
								Medium_Lowland	PAN2423	120	4	2016-12-08	2016	fallow	0	0	0	?	0	0	0	1	1	1	1	?	?	?	?	0	0.076	-0.185	-0.189	-0.192	-0.193	-0.191	-0.166	-0.102	-0.015	0	0.006	0.027	0.076	0	0	0	0	0	0
								Medium_Lowland	PAN2423	120	4	2016-12-09	2016	fallow	0	0	0	?	0	0	0	1	1	1	1	?	?	?	?	0	0.059	-0.182	-0.186	-0.189	-0.189	-0.188	-0.164	-0.1	-0.017	0	0.004	0.02	0.059	0	0	0	0	0	0
								Medium_Lowland	PAN2423	120	4	2016-12-10	2016	fallow	0	0	0	?	0	0	0	1	1	1	1	?	?	?	?	0	0.046	-0.179	-0.183	-0.186	-0.186	-0.185	-0.162	-0.099	-0.019	0	0.003	0.015	0.046	0	0	0	0	0	0
								Medium_Lowland	PAN2423	120	4	2016-12-11	2016	fallow	0	0	0	?	0	0	0	1	1	1	1	?	?	?	?	0	0.036	-0.176	-0.18	-0.183	-0.183	-0.183	-0.159	-0.097	-0.021	0	0.002	0.011	0.036	0	0	0	0	0	0
								Medium_Lowland	PAN2423	120	4	2016-12-12	2016	fallow	0	0	0	?	0	0.05	0	1	1	1	1	?	?	?	?	0	0.027	-0.14	-0.157	-0.168	-0.172	-0.179	-0.157	-0.096	-0.023	0	0.001	0.008	0.027	0	0	0	0	0	0
								Medium_Lowland	PAN2423	120	4	2016-12-13	2016	fallow	0	0	0	?	0	0	0	1	1	1	1	?	?	?	?	0	0.021	-0.164	-0.166	-0.169	-0.172	-0.175	-0.155	-0.095	-0.024	0	0.001	0.006	0.021	0	0	0	0	0	0
								Medium_Lowland	PAN2423	120	4	2016-12-14	2016	fallow	0	0	0	?	0	0	0	1	1	1	1	?	?	?	?	0	0.016	-0.166	-0.167	-0.169	-0.171	-0.172	-0.153	-0.094	-0.026	0	0.001	0.004	0.016	0	0	0	0	0	0
								Medium_Lowland	PAN2423	120	4	2016-12-15	2016	fallow	0	0	0	?	0	0.12	0	1	1	1	1	?	?	?	?	0	0.012	-0.084	-0.118	-0.141	-0.15	-0.167	-0.151	-0.093	-0.027	0	0	0.003	0.012	0	0	0	0	0	0
								Medium_Lowland	PAN2423	120	4	2016-12-16	2016	fallow	0	0	0	?	0	0	0	1	1	1	1	?	?	?	?	0	0.009	-0.147	-0.144	-0.147	-0.152	-0.163	-0.148	-0.092	-0.028	0	0	0.002	0.009	0	0	0	0	0	0
								Medium_Lowland	PAN2423	120	4	2016-12-17	2016	fallow	0	0	0	?	0	0	0	1	1	1	1	?	?	?	?	0	0.007	-0.154	-0.151	-0.152	-0.155	-0.16	-0.146	-0.091	-0.029	0	0	0.002	0.007	0	0	0	0	0	0
								Medium_Lowland	PAN2423	120	4	2016-12-18	2016	fallow	0	0	0	?	0	0	0	1	1	1	1	?	?	?	?	0	0.005	-0.155	-0.154	-0.154	-0.156	-0.158	-0.144	-0.09	-0.03	0	0	0.001	0.005	0	0	0	0	0	0
								Medium_Lowland	PAN2423	120	4	2016-12-19	2016	fallow	0	0	0	?	0	0	0	1	1	1	1	?	?	?	?	0	0.004	-0.155	-0.155	-0.155	-0.156	-0.156	-0.142	-0.089	-0.031	0	0	0.001	0.004	0	0	0	0	0	0
								Medium_Lowland	PAN2423	120	4	2016-12-20	2016	fallow	0	0	0	?	0	0	0	1	1	1	1	?	?	?	?	0	0.003	-0.154	-0.154	-0.155	-0.155	-0.155	-0.14	-0.089	-0.032	0	0	0.001	0.003	0	0	0	0	0	0
								Medium_Lowland	PAN2423	120	4	2016-12-21	2016	fallow	0	0	0	?	0	0	0	1	1	1	1	?	?	?	?	0	0.002	-0.153	-0.154	-0.154	-0.154	-0.153	-0.138	-0.088	-0.032	0	0	0	0.002	0	0	0	0	0	0
								Medium_Lowland	PAN2423	120	4	2016-12-22	2016	fallow	0	0	0	?	0	0	0	1	1	1	1	?	?	?	?	0	0.002	-0.151	-0.152	-0.153	-0.153	-0.152	-0.136	-0.087	-0.033	0	0	0	0.002	0	0	0	0	0	0
								Medium_Lowland	PAN2423	120	4	2016-12-23	2016	fallow	0	0	0	?	0	0	0	1	1	1	1	?	?	?	?	0	0.001	-0.15	-0.151	-0.152	-0.152	-0.15	-0.135	-0.086	-0.033	0	0	0	0.001	0	0	0	0	0	0
								Medium_Lowland	PAN2423	120	4	2016-12-24	2016	fallow	0	0	0	?	0	0	0	1	1	1	1	?	?	?	?	0	0.001	-0.148	-0.15	-0.151	-0.15	-0.149	-0.133	-0.086	-0.034	0	0	0	0.001	0	0	0	0	0	0
								Medium_Lowland	PAN2423	120	4	2016-12-25	2016	fallow	0	0	0	?	0	0	0	1	1	1	1	?	?	?	?	0	0.001	-0.147	-0.148	-0.149	-0.149	-0.147	-0.131	-0.085	-0.034	0	0	0	0.001	0	0	0	0	0	0
								Medium_Lowland	PAN2423	120	4	2016-12-26	2016	fallow	0	0	0	?	0	0	0	1	1	1	1	?	?	?	?	0	0.001	-0.145	-0.147	-0.148	-0.148	-0.145	-0.13	-0.084	-0.034	0	0	0	0.001	0	0	0	0	0	0
								Medium_Lowland	PAN2423	120	4	2016-12-27	2016	fallow	0	0	0	?	0	0	0	1	1	1	1	?	?	?	?	0	0	-0.144	-0.145	-0.146	-0.146	-0.144	-0.128	-0.084	-0.035	0	0	0	0	0	0	0	0	0	0
								Medium_Lowland	PAN2423	120	4	2016-12-28	2016	fallow	0	0	0	?	0	0	0	1	1	1	1	?	?	?	?	0	0	-0.142	-0.144	-0.145	-0.145	-0.142	-0.127	-0.083	-0.035	0	0	0	0	0	0	0	0	0	0
								Medium_Lowland	PAN2423	120	4	2016-12-29	2016	fallow	0	0	0	?	0	0	0	1	1	1	1	?	?	?	?	0	0	-0.141	-0.142	-0.143	-0.143	-0.141	-0.126	-0.083	-0.035	0	0	0	0	0	0	0	0	0	0
								Medium_Lowland	PAN2423	120	4	2016-12-30	2016	fallow	0	0	0	?	0	0	0	1	1	1	1	?	?	?	?	0	0	-0.139	-0.141	-0.142	-0.142	-0.14	-0.124	-0.082	-0.035	0	0	0	0	0	0	0	0	0	0
								Medium_Lowland	PAN2423	120	4	2016-12-31	2016	fallow	0	0	0	?	0	0	0	1	1	1	1	?	?	?	?	0	0	-0.138	-0.14	-0.141	-0.14	-0.138	-0.123	-0.082	-0.036	0	0	0	0	0	0	0	0	0	0
								Medium_Lowland	PAN2423	120	4	2017-01-01	2017	fallow	0	0	0	?	0	0	0	1	1	1	1	?	?	?	?	0	0	-0.137	-0.138	-0.139	-0.139	-0.137	-0.122	-0.081	-0.036	0	0	0	0	0	0	0	0	0	0
								Medium_Lowland	PAN2423	120	4	2017-01-02	2017	fallow	0	0	0	?	0	0.86	0	1	1	1	1	?	?	?	?	0	0	0.438	0.207	0.059	0.003	-0.113	-0.119	-0.08	-0.036	0	0	0	0	0	0	0	0	0	0
								Medium_Lowland	PAN2423	120	4	2017-01-03	2017	fallow	0	0	0	?	0	1.15	0	1	1	1	1	?	?	?	?	0	0	0.464	0.302	0.174	0.092	-0.079	-0.116	-0.08	-0.036	0	0	0	0	0	0	0	0	0	0
								Medium_Lowland	PAN2423	120	4	2017-01-04	2017	fallow	0	0	0	?	0	0.12	0	1	1	1	1	?	?	?	?	0	0	0.278	0.237	0.174	0.102	-0.05	-0.111	-0.079	-0.036	0	0	0	0	0	0	0	0	0	0
								Medium_Lowland	PAN2423	120	4	2017-01-05	2017	fallow	0	0	0	?	0	0.04	0	1	1	1	1	?	?	?	?	0	0	0.116	0.139	0.123	0.074	-0.033	-0.105	-0.078	-0.036	0	0	0	0	0	0	0	0	0	0
								Medium_Lowland	PAN2423	120	4	2017-01-06	2017	fallow	0	0	0	?	0	0	0	1	1	1	1	?	?	?	?	0	0	-0.04	0.025	0.046	0.024	-0.029	-0.1	-0.077	-0.036	0	0	0	0	0	0	0	0	0	0
								Medium_Lowland	PAN2423	120	4	2017-01-07	2017	fallow	0	0	0	?	0	0	0	1	1	1	1	?	?	?	?	0	0	-0.077	-0.028	-0.006	-0.013	-0.033	-0.096	-0.077	-0.036	0	0	0	0	0	0	0	0	0	0
								Medium_Lowland	PAN2423	120	4	2017-01-08	2017	fallow	0	0	0	?	0	0	0	1	1	1	1	?	?	?	?	0	0	-0.094	-0.059	-0.039	-0.037	-0.041	-0.092	-0.076	-0.036	0	0	0	0	0	0	0	0	0	0
								Medium_Lowland	PAN2423	120	4	2017-01-09	2017	fallow	0	0	0	?	0	0	0	1	1	1	1	?	?	?	?	0	0	-0.104	-0.078	-0.061	-0.055	-0.049	-0.089	-0.075	-0.036	0	0	0	0	0	0	0	0	0	0
								Medium_Lowland	PAN2423	120	4	2017-01-10	2017	fallow	0	0	0	?	0	0.01	0	1	1	1	1	?	?	?	?	0	0	-0.103	-0.086	-0.073	-0.066	-0.057	-0.086	-0.074	-0.036	0	0	0	0	0	0	0	0	0	0
								Medium_Lowland	PAN2423	120	4	2017-01-11	2017	fallow	0	0	0	?	0	0	0	1	1	1	1	?	?	?	?	0	0	-0.112	-0.096	-0.083	-0.076	-0.064	-0.085	-0.073	-0.036	0	0	0	0	0	0	0	0	0	0
								Medium_Lowland	PAN2423	120	4	2017-01-12	2017	fallow	0	0	0	?	0	0	0	1	1	1	1	?	?	?	?	0	0	-0.114	-0.102	-0.091	-0.083	-0.07	-0.083	-0.072	-0.036	0	0	0	0	0	0	0	0	0	0
								Medium_Lowland	PAN2423	120	4	2017-01-13	2017	fallow	0	0	0	?	0	0	0	1	1	1	1	?	?	?	?	0	0	-0.116	-0.106	-0.096	-0.088	-0.075	-0.082	-0.071	-0.035	0	0	0	0	0	0	0	0	0	0
								Medium_Lowland	PAN2423	120	4	2017-01-14	2017	fallow	0	0	0	?	0	0	0	1	1	1	1	?	?	?	?	0	0	-0.116	-0.108	-0.1	-0.093	-0.079	-0.082	-0.07	-0.035	0	0	0	0	0	0	0	0	0	0
								Medium_Lowland	PAN2423	120	4	2017-01-15	2017	fallow	0	0	0	?	0	0	0	1	1	1	1	?	?	?	?	0	0	-0.117	-0.11	-0.102	-0.096	-0.082	-0.081	-0.069	-0.035	0	0	0	0	0	0	0	0	0	0
								Medium_Lowland	PAN2423	120	4	2017-01-16	2017	fallow	0	0	0	?	0	0	0	1	1	1	1	?	?	?	?	0	0	-0.117	-0.111	-0.104	-0.098	-0.085	-0.081	-0.069	-0.035	0	0	0	0	0	0	0	0	0	0
								Medium_Lowland	PAN2423	120	4	2017-01-17	2017	fallow	0	0	0	?	0	0	0	1	1	1	1	?	?	?	?	0	0	-0.116	-0.112	-0.106	-0.1	-0.088	-0.081	-0.068	-0.035	0	0	0	0	0	0	0	0	0	0
								Medium_Lowland	PAN2423	120	4	2017-01-18	2017	fallow	0	0	0	?	0	0	0	1	1	1	1	?	?	?	?	0	0	-0.116	-0.112	-0.107	-0.101	-0.089	-0.081	-0.067	-0.035	0	0	0	0	0	0	0	0	0	0
								Medium_Lowland	PAN2423	120	4	2017-01-19	2017	fallow	0	0	0	?	0	0	0	1	1	1	1	?	?	?	?	0	0	-0.116	-0.112	-0.107	-0.102	-0.091	-0.08	-0.066	-0.034	0	0	0	0	0	0	0	0	0	0
								Medium_Lowland	PAN2423	120	4	2017-01-20	2017	fallow	0	0	0	?	0	0	0	1	1	1	1	?	?	?	?	0	0	-0.115	-0.112	-0.108	-0.103	-0.092	-0.08	-0.066	-0.034	0	0	0	0	0	0	0	0	0	0
								Medium_Lowland	PAN2423	120	4	2017-01-21	2017	fallow	0	0	0	?	0	0	0	1	1	1	1	?	?	?	?	0	0	-0.115	-0.112	-0.108	-0.103	-0.093	-0.08	-0.065	-0.034	0	0	0	0	0	0	0	0	0	0
								Medium_Lowland	PAN2423	120	4	2017-01-22	2017	fallow	0	0	0	?	0	0	0	1	1	1	1	?	?	?	?	0	0	-0.114	-0.112	-0.108	-0.104	-0.094	-0.08	-0.065	-0.034	0	0	0	0	0	0	0	0	0	0
								Medium_Lowland	PAN2423	120	4	2017-01-23	2017	fallow	0	0	0	?	0	0	0	1	1	1	1	?	?	?	?	0	0	-0.113	-0.111	-0.108	-0.104	-0.094	-0.081	-0.064	-0.033	0	0	0	0	0	0	0	0	0	0
								Medium_Lowland	PAN2423	120	4	2017-01-24	2017	fallow	0	0	0	?	0	0	0	1	1	1	1	?	?	?	?	0	0	-0.113	-0.111	-0.108	-0.104	-0.094	-0.081	-0.063	-0.033	0	0	0	0	0	0	0	0	0	0
								Medium_Lowland	PAN2423	120	4	2017-01-25	2017	fallow	0	0	0	?	0	0	0	1	1	1	1	?	?	?	?	0	0	-0.112	-0.111	-0.108	-0.104	-0.095	-0.081	-0.063	-0.033	0	0	0	0	0	0	0	0	0	0
								Medium_Lowland	PAN2423	120	4	2017-01-26	2017	fallow	0	0	0	?	0	0	0	1	1	1	1	?	?	?	?	0	0	-0.112	-0.11	-0.107	-0.104	-0.095	-0.08	-0.062	-0.033	0	0	0	0	0	0	0	0	0	0
								Medium_Lowland	PAN2423	120	4	2017-01-27	2017	fallow	0	0	0	?	0	0.01	0	1	1	1	1	?	?	?	?	0	0	-0.104	-0.106	-0.105	-0.102	-0.095	-0.08	-0.062	-0.033	0	0	0	0	0	0	0	0	0	0
								Medium_Lowland	PAN2423	120	4	2017-01-28	2017	fallow	0	0	0	?	0	0.01	0	1	1	1	1	?	?	?	?	0	0	-0.102	-0.103	-0.103	-0.1	-0.094	-0.08	-0.062	-0.032	0	0	0	0	0	0	0	0	0	0
								Medium_Lowland	PAN2423	120	4	2017-01-29	2017	fallow	0	0	0	?	0	0	0	1	1	1	1	?	?	?	?	0	0	-0.108	-0.106	-0.103	-0.101	-0.094	-0.08	-0.061	-0.032	0	0	0	0	0	0	0	0	0	0
								Medium_Lowland	PAN2423	120	4	2017-01-30	2017	fallow	0	0	0	?	0	0	0	1	1	1	1	?	?	?	?	0	0	-0.108	-0.106	-0.104	-0.101	-0.094	-0.08	-0.061	-0.032	0	0	0	0	0	0	0	0	0	0
								Medium_Lowland	PAN2423	120	4	2017-01-31	2017	fallow	0	0	0	?	0	0	0	1	1	1	1	?	?	?	?	0	0	-0.108	-0.106	-0.104	-0.101	-0.094	-0.08	-0.06	-0.032	0	0	0	0	0	0	0	0	0	0
								Medium_Lowland	PAN2423	120	4	2017-02-01	2017	fallow	0	0	0	?	0	0	0	1	1	1	1	?	?	?	?	0	0	-0.108	-0.106	-0.104	-0.101	-0.094	-0.08	-0.06	-0.032	-0.001	0	0	0	0	0	0	0	0	0
								Medium_Lowland	PAN2423	120	4	2017-02-02	2017	fallow	0	0	0	?	0	0	0	1	1	1	1	?	?	?	?	0	0	-0.107	-0.106	-0.104	-0.101	-0.093	-0.08	-0.06	-0.031	-0.002	0	0	0	0	0	0	0	0	0
								Medium_Lowland	PAN2423	120	4	2017-02-03	2017	fallow	0	0	0	?	0	0	0	1	1	1	1	?	?	?	?	0	0	-0.107	-0.105	-0.103	-0.101	-0.093	-0.079	-0.059	-0.031	-0.003	0	0	0	0	0	0	0	0	0
								Medium_Lowland	PAN2423	120	4	2017-02-04	2017	fallow	0	0	0	?	0	0	0	1	1	1	1	?	?	?	?	0	0	-0.106	-0.105	-0.103	-0.1	-0.093	-0.079	-0.059	-0.031	-0.004	0	0	0	0	0	0	0	0	0
								Medium_Lowland	PAN2423	120	4	2017-02-05	2017	fallow	0	0	0	?	0	0	0	1	1	1	1	?	?	?	?	0	0	-0.105	-0.105	-0.103	-0.1	-0.093	-0.079	-0.058	-0.031	-0.005	0	0	0	0	0	0	0	0	0
								Medium_Lowland	PAN2423	120	4	2017-02-06	2017	fallow	0	0	0	?	0	0	0	1	1	1	1	?	?	?	?	0	0	-0.105	-0.104	-0.102	-0.1	-0.093	-0.079	-0.058	-0.031	-0.005	0	0	0	0	0	0	0	0	0
								Medium_Lowland	PAN2423	120	4	2017-02-07	2017	fallow	0	0	0	?	0	0	0	1	1	1	1	?	?	?	?	0	0	-0.104	-0.104	-0.102	-0.099	-0.092	-0.079	-0.058	-0.031	-0.006	0	0	0	0	0	0	0	0	0
								Medium_Lowland	PAN2423	120	4	2017-02-08	2017	fallow	0	0	0	?	0	0	0	1	1	1	1	?	?	?	?	0	0	-0.104	-0.103	-0.101	-0.099	-0.092	-0.079	-0.058	-0.031	-0.007	0	0	0	0	0	0	0	0	0
								Medium_Lowland	PAN2423	120	4	2017-02-09	2017	fallow	0	0	0	?	0	0	0	1	1	1	1	?	?	?	?	0	0	-0.103	-0.103	-0.101	-0.098	-0.092	-0.078	-0.057	-0.031	-0.007	0	0	0	0	0	0	0	0	0
								Medium_Lowland	PAN2423	120	4	2017-02-10	2017	fallow	0	0	0	?	0	0	0	1	1	1	1	?	?	?	?	0	0	-0.103	-0.102	-0.1	-0.098	-0.091	-0.078	-0.057	-0.031	-0.008	0	0	0	0	0	0	0	0	0
								Medium_Lowland	PAN2423	120	4	2017-02-11	2017	fallow	0	0	0	?	0	0	0	1	1	1	1	?	?	?	?	0	0	-0.102	-0.102	-0.1	-0.098	-0.091	-0.078	-0.057	-0.031	-0.008	0	0	0	0	0	0	0	0	0
								Medium_Lowland	PAN2423	120	4	2017-02-12	2017	fallow	0	0	0	?	0	0	0	1	1	1	1	?	?	?	?	0	0	-0.102	-0.101	-0.1	-0.097	-0.091	-0.078	-0.056	-0.031	-0.009	0	0	0	0	0	0	0	0	0
								Medium_Lowland	PAN2423	120	4	2017-02-13	2017	fallow	0	0	0	?	0	0	0	1	1	1	1	?	?	?	?	0	0	-0.101	-0.101	-0.099	-0.097	-0.091	-0.077	-0.056	-0.031	-0.009	0	0	0	0	0	0	0	0	0
								Medium_Lowland	PAN2423	120	4	2017-02-14	2017	fallow	0	0	0	?	0	0	0	1	1	1	1	?	?	?	?	0	0	-0.101	-0.1	-0.099	-0.096	-0.09	-0.077	-0.056	-0.031	-0.01	0	0	0	0	0	0	0	0	0
								Medium_Lowland	PAN2423	120	4	2017-02-15	2017	fallow	0	0	0	?	0	0	0	1	1	1	1	?	?	?	?	0	0	-0.1	-0.1	-0.098	-0.096	-0.09	-0.077	-0.056	-0.031	-0.01	0	0	0	0	0	0	0	0	0
								Medium_Lowland	PAN2423	120	4	2017-02-16	2017	fallow	0	0	0	?	0	0	0	1	1	1	1	?	?	?	?	0	0	-0.1	-0.099	-0.098	-0.095	-0.089	-0.077	-0.055	-0.031	-0.01	0	0	0	0	0	0	0	0	0
								Medium_Lowland	PAN2423	120	4	2017-02-17	2017	fallow	0	0	0	?	0	0	0	1	1	1	1	?	?	?	?	0	0	-0.099	-0.099	-0.097	-0.095	-0.089	-0.076	-0.055	-0.031	-0.011	0	0	0	0	0	0	0	0	0
								Medium_Lowland	PAN2423	120	4	2017-02-18	2017	fallow	0	0	0	?	0	0	0	1	1	1	1	?	?	?	?	0	0	-0.099	-0.098	-0.097	-0.095	-0.089	-0.076	-0.055	-0.031	-0.011	0	0	0	0	0	0	0	0	0
								Medium_Lowland	PAN2423	120	4	2017-02-19	2017	fallow	0	0	0	?	0	0	0	1	1	1	1	?	?	?	?	0	0	-0.098	-0.098	-0.096	-0.094	-0.088	-0.076	-0.055	-0.031	-0.011	0	0	0	0	0	0	0	0	0
								Medium_Lowland	PAN2423	120	4	2017-02-20	2017	fallow	0	0	0	?	0	0	0	1	1	1	1	?	?	?	?	0	0	-0.098	-0.097	-0.096	-0.094	-0.088	-0.076	-0.055	-0.031	-0.012	0	0	0	0	0	0	0	0	0
								Medium_Lowland	PAN2423	120	4	2017-02-21	2017	fallow	0	0	0	?	0	0.01	0	1	1	1	1	?	?	?	?	0	0	-0.091	-0.093	-0.093	-0.092	-0.087	-0.075	-0.054	-0.031	-0.012	0	0	0	0	0	0	0	0	0
								Medium_Lowland	PAN2423	120	4	2017-02-22	2017	fallow	0	0	0	?	0	0.01	0	1	1	1	1	?	?	?	?	0	0	-0.089	-0.091	-0.091	-0.09	-0.087	-0.075	-0.054	-0.031	-0.012	0	0	0	0	0	0	0	0	0
								Medium_Lowland	PAN2423	120	4	2017-02-23	2017	fallow	0	0	0	?	0	0.17	0	1	1	1	1	?	?	?	?	0	0	0.019	-0.025	-0.053	-0.063	-0.081	-0.074	-0.054	-0.031	-0.012	0	0	0	0	0	0	0	0	0
								Medium_Lowland	PAN2423	120	4	2017-02-24	2017	fallow	0	0	0	?	0	0.02	0	1	1	1	1	?	?	?	?	0	0	-0.059	-0.057	-0.059	-0.065	-0.078	-0.074	-0.054	-0.031	-0.012	0	0	0	0	0	0	0	0	0
								Medium_Lowland	PAN2423	120	4	2017-02-25	2017	fallow	0	0	0	?	0	0	0	1	1	1	1	?	?	?	?	0	0	-0.083	-0.073	-0.07	-0.072	-0.076	-0.073	-0.053	-0.031	-0.013	0	0	0	0	0	0	0	0	0
								Medium_Lowland	PAN2423	120	4	2017-02-26	2017	fallow	0	0	0	?	0	0	0	1	1	1	1	?	?	?	?	0	0	-0.088	-0.081	-0.077	-0.077	-0.076	-0.072	-0.053	-0.031	-0.013	0	0	0	0	0	0	0	0	0
								Medium_Lowland	PAN2423	120	4	2017-02-27	2017	fallow	0	0	0	?	0	0	0	1	1	1	1	?	?	?	?	0	0	-0.09	-0.085	-0.081	-0.08	-0.076	-0.072	-0.053	-0.031	-0.013	0	0	0	0	0	0	0	0	0
								Medium_Lowland	PAN2423	120	4	2017-02-28	2017	fallow	0	0	0	?	0	0	0	1	1	1	1	?	?	?	?	0	0	-0.091	-0.087	-0.084	-0.082	-0.077	-0.071	-0.053	-0.031	-0.013	0	0	0	0	0	0	0	0	0
								Medium_Lowland	PAN2423	120	4	2017-03-01	2017	fallow	0	0	0	?	0	0	0	1	1	1	1	?	?	?	?	0	0	-0.092	-0.089	-0.086	-0.083	-0.077	-0.071	-0.053	-0.031	-0.013	0	0	0	0	0	0	0	0	0
								Medium_Lowland	PAN2423	120	4	2017-03-02	2017	fallow	0	0	0	?	0	0	0	1	1	1	1	?	?	?	?	0	0	-1.086	-0.686	-0.428	-0.328	-0.118	-0.072	-0.052	-0.031	-0.013	0	0	0	0	0	0	0	0	0
								Medium_Lowland	PAN2423	120	4	2017-03-03	2017	fallow	0	0	0	?	0	0	0	1	1	1	1	?	?	?	?	0	0	-0.375	-0.396	-0.367	-0.289	-0.14	-0.075	-0.052	-0.031	-0.014	0	0	0	0	0	0	0	0	0
								Medium_Lowland	PAN2423	120	4	2017-03-04	2017	fallow	0	0	0	?	0	0	0	1	1	1	1	?	?	?	?	0	0	-0.277	-0.313	-0.303	-0.249	-0.15	-0.078	-0.052	-0.031	-0.014	0	0	0	0	0	0	0	0	0
								Medium_Lowland	PAN2423	120	4	2017-03-05	2017	fallow	0	0	0	?	0	1.24	0	1	1	1	1	?	?	?	?	0	0	-0.248	-0.27	-0.261	-0.225	-0.154	-0.08	-0.052	-0.031	-0.014	0	0	0	0	0	0	0	0	0
								Medium_Lowland	PAN2423	120	4	2017-03-06	2017	fallow	0	0	0	?	0	1.46	0	1	1	1	1	?	?	?	?	0	0	-0.232	-0.244	-0.236	-0.21	-0.155	-0.083	-0.052	-0.031	-0.014	0	0	0	0	0	0	0	0	0
								Medium_Lowland	PAN2423	120	4	2017-03-07	2017	fallow	0	0	0	?	0	0.07	0	1	1	1	1	?	?	?	?	0	0	-0.222	-0.227	-0.22	-0.199	-0.154	-0.085	-0.053	-0.031	-0.014	0	0	0	0	0	0	0	0	0
								Medium_Lowland	PAN2423	120	4	2017-03-08	2017	fallow	0	0	0	?	0	14.6	0	1	1	1	1	?	?	?	?	0	0	13.004	11.514	8.78	5.362	2.315	0.055	-0.05	-0.031	-0.014	0	0	0	0	0	0	0	0	0
								Medium_Lowland	PAN2423	120	4	2017-03-09	2017	fallow	0	0	0	?	0	2.89	0	1	1	1	1	?	?	?	?	0	0	0.822	1.83	1.83	1.83	1.2	0.362	-0.041	-0.031	-0.014	0	0	0	0	0	0	0	0	0
								Medium_Lowland	PAN2423	120	4	2017-03-10	2017	fallow	0	0	0	?	0	10.68	0	1	1	1	1	?	?	?	?	0	0	8.284	8.431	8.431	8.431	4.631	2.228	0.016	-0.029	-0.014	0	0	0	0	0	0	0	0	0.1
								Medium_Lowland	PAN2423	120	4	2017-03-11	2017	fallow	0	0	0	?	0	35.29	0	1	1	1	1	?	?	?	?	0	0	21.32	21.32	21.32	21.32	21.32	12	4.672	0.113	-0.01	0	0	0	0	0	0	0	0	0.2
								Medium_Lowland	PAN2423	120	4	2017-03-12	2017	fallow	0	0	0	?	0	4.3	0	1	1	1	1	?	?	?	?	0	0	1.83	1.83	1.83	1.83	2.5	4.8	4.532	1.303	0.037	0	0	0	0	0	0	0	0	0
								Medium_Lowland	PAN2423	120	4	2017-03-13	2017	fallow	0	0	0	?	0	0.12	0	1	1	1	1	?	?	?	?	0	0	-1.096	-1.297	0.855	1.14	2.5	4.8	4.639	2.069	0.358	0	0	0	0	0	0	0	0	0
								Medium_Lowland	PAN2423	120	4	2017-03-14	2017	fallow	0	0	0	?	0	0	0	1	1	1	1	?	?	?	?	0	0.026	-1.163	-0.698	-1.067	0.997	1.984	3.753	4.285	2.734	0.975	0.292	0.088	0.026	0	0	0	0	0	0
								Medium_Lowland	PAN2423	120	4	2017-03-15	2017	fallow	0	0	0	?	0	0	0	1	1	1	1	?	?	?	?	0	0.098	-1.008	-1.032	-0.589	-0.659	0.992	2.649	3.631	3.003	1.583	0.68	0.265	0.098	0	0	0	0	0	0
								Medium_Lowland	PAN2423	120	4	2017-03-16	2017	fallow	0	0	0	?	0	0	0	1	1	1	1	?	?	?	?	0	0.221	-1.016	-0.845	-0.765	0	0.167	1.656	2.841	2.954	1.994	1.074	0.508	0.221	0	0	0	0	0	0
								Medium_Lowland	PAN2423	120	4	2017-03-17	2017	fallow	0	0	0	?	0	0.08	0	1	1	1	1	?	?	?	?	0	0.389	-0.883	-0.836	-0.478	-0.872	0.083	1.027	2.115	2.702	2.207	1.414	0.78	0.389	0	0	0	0	0	0
								Medium_Lowland	PAN2423	120	4	2017-03-18	2017	fallow	0	0	0	?	0	0.25	0	1	1	1	1	?	?	?	?	0	0.586	-0.793	-0.667	-0.755	-0.539	-0.407	0.616	1.516	2.346	2.249	1.664	1.045	0.586	0	0	0	0	0	0
								Medium_Lowland	PAN2423	120	4	2017-03-19	2017	fallow	0	0	0	?	0	2.26	0	1	1	1	1	?	?	?	?	0	0.792	-0.362	-0.519	-0.528	-0.493	-0.325	0.207	0.992	1.94	2.156	1.812	1.275	0.792	0	0	0	0	0	0
								Medium_Lowland	PAN2423	120	4	2017-03-20	2017	fallow	0	0	0	?	0	11.77	0	1	1	1	1	?	?	?	?	0	0.99	8.826	8.398	5.83	2.929	0.92	0.362	0.74	1.58	1.983	1.863	1.452	0.99	0	0	0	0	0	0
								Medium_Lowland	PAN2423	120	4	2017-03-21	2017	fallow	0	0	0	?	0	0	0	1	1	1	1	?	?	?	?	0	1.163	-1.096	-1.297	0.855	1.14	1.03	0.629	0.696	1.315	1.783	1.839	1.568	1.163	0	0	0	0	0	0
								Medium_Lowland	PAN2423	120	4	2017-03-22	2017	fallow	0	0	0	?	0	0.12	0	1	1	1	1	?	?	?	?	0	1.302	-1.163	-0.698	-1.067	0.997	1.014	0.783	0.731	1.14	1.59	1.764	1.627	1.302	0	0	0	0	0	0
								Medium_Lowland	PAN2423	120	4	2017-03-23	2017	fallow	0	0	0	?	0	0	0	1	1	1	1	?	?	?	?	0	1.35	-1.008	-1.032	-0.589	-0.575	0.507	0.673	0.708	1.01	1.416	1.66	1.637	1.35	0	0	0	0	0	0
								Medium_Lowland	PAN2423	120	4	2017-03-24	2017	fallow	0	0	0	?	0	0	0	1	1	1	1	?	?	?	?	0	1.35	-1.016	-0.845	-0.73	-0.521	-0.178	0.404	0.586	0.883	1.256	1.539	1.607	1.35	0	0	0	0	0	0
								Medium_Lowland	PAN2423	120	4	2017-03-25	2017	fallow	0	0	0	?	0	0	0	1	1	1	1	?	?	?	?	0	1.35	-0.959	-0.867	-0.719	-0.564	-0.22	0.171	0.42	0.744	1.102	1.408	1.547	1.35	0	0	0	0	0	0
								Medium_Lowland	PAN2423	120	4	2017-03-26	2017	fallow	0	0	0	?	0	0.03	0	1	1	1	1	?	?	?	?	0	1.35	-0.92	-0.839	-0.722	-0.578	-0.264	0.014	0.258	0.598	0.951	1.271	1.464	1.35	0	0	0	0	0	0
								Medium_Lowland	PAN2423	120	4	2017-03-27	2017	fallow	0	0	0	?	0	0.01	0	1	1	1	1	?	?	?	?	0	1.35	-0.813	-0.776	-0.691	-0.569	-0.286	-0.135	0.155	0.465	0.805	1.131	1.364	1.35	0	0	0	0	0	0
								Medium_Lowland	PAN2423	120	4	2017-03-28	2017	fallow	0	0	0	?	0	0.01	0	1	1	1	1	?	?	?	?	0	1.35	-0.729	-0.714	-0.652	-0.548	-0.312	-0.137	0.039	0.337	0.665	0.991	1.252	1.35	0	0	0	0	0	0
								Medium_Lowland	PAN2423	120	4	2017-03-29	2017	fallow	0	0	0	?	0	0.03	0	1	1	1	1	?	?	?	?	0	1.35	-0.663	-0.659	-0.611	-0.525	-0.323	-0.141	-0.197	0.236	0.536	0.855	1.133	1.35	0	0	0	0	0	0
								Medium_Lowland	PAN2423	120	4	2017-03-30	2017	fallow	0	0	0	?	0	0.03	0	1	1	1	1	?	?	?	?	0	1.35	-0.611	-0.611	-0.574	-0.476	-0.323	-0.156	-0.178	0.106	0.407	0.72	1.009	1.35	0	0	0	0	0	0
								Medium_Lowland	PAN2423	120	4	2017-03-31	2017	fallow	0	0	0	?	0	0.01	0	1	1	1	1	?	?	?	?	0	1.241	-0.568	-0.571	-0.53	-0.449	-0.32	-0.167	0	0.021	0.291	0.592	0.884	1.241	0	0	0	0	0	0
								Medium_Lowland	PAN2423	120	4	2017-04-01	2017	fallow	0	0	0	?	0	0.02	0	1	1	1	1	?	?	?	?	0	1.098	-0.533	-0.532	-0.496	-0.428	-0.316	-0.166	-0.175	0.014	0.208	0.477	0.762	1.098	0	0	0	0	0	0
								Medium_Lowland	PAN2423	120	4	2017-04-02	2017	fallow	0	0	0	?	0	0.04	0	1	1	1	1	?	?	?	?	0	0.962	-0.501	-0.499	-0.469	-0.411	-0.311	-0.175	-0.167	0	0.146	0.377	0.646	0.962	0	0	0	0	0	0
								Medium_Lowland	PAN2423	120	4	2017-04-03	2017	fallow	0	0	0	?	0	0.15	0	1	1	1	1	?	?	?	?	0	0.836	-0.474	-0.472	-0.446	-0.395	-0.306	-0.182	-0.159	0	0.102	0.295	0.541	0.836	0	0	0	0	0	0
								Medium_Lowland	PAN2423	120	4	2017-04-04	2017	fallow	0	0	0	?	0	0.25	0	1	1	1	1	?	?	?	?	0	0.719	-0.452	-0.449	-0.426	-0.382	-0.302	-0.188	-0.153	0	0.071	0.228	0.447	0.719	0	0	0	0	0	0
								Medium_Lowland	PAN2423	120	4	2017-04-05	2017	fallow	0	0	0	?	0	0.28	0	1	1	1	1	?	?	?	?	0	0.613	-0.432	-0.43	-0.409	-0.37	-0.297	-0.192	-0.147	0	0.05	0.174	0.365	0.613	0	0	0	0	0	0
								Medium_Lowland	PAN2423	120	4	2017-04-06	2017	fallow	0	0	0	?	0	0.37	0	1	1	1	1	?	?	?	?	0	0.518	-0.415	-0.413	-0.394	-0.359	-0.293	-0.194	-0.142	0	0.035	0.133	0.295	0.518	0	0	0	0	0	0
								Medium_Lowland	PAN2423	120	4	2017-04-07	2017	fallow	0	0	0	?	0	0.2	0	1	1	1	1	?	?	?	?	0	0.433	-0.4	-0.398	-0.381	-0.35	-0.289	-0.196	-0.137	0	0.024	0.1	0.237	0.433	0	0	0	0	0	0
								Medium_Lowland	PAN2423	120	4	2017-04-08	2017	fallow	0	0	0	?	0	0.63	0	1	1	1	1	?	?	?	?	0	0.36	-0.386	-0.384	-0.369	-0.341	-0.285	-0.198	-0.133	0	0.017	0.075	0.188	0.36	0	0	0	0	0	0
								Medium_Lowland	PAN2423	120	4	2017-04-09	2017	fallow	0	0	0	?	0	0.94	0	1	1	1	1	?	?	?	?	0	0.297	-0.374	-0.372	-0.359	-0.333	-0.282	-0.198	-0.129	0	0.012	0.056	0.149	0.297	0	0	0	0	0	0
								Medium_Lowland	PAN2423	120	4	2017-04-10	2017	fallow	0	0	0	?	0	0.11	0	1	1	1	1	?	?	?	?	0	0.243	-0.363	-0.361	-0.349	-0.326	-0.278	-0.198	-0.126	0	0.008	0.042	0.117	0.243	0	0	0	0	0	0
								Medium_Lowland	PAN2423	120	4	2017-04-11	2017	fallow	0	0	0	?	0	0.02	0	1	1	1	1	?	?	?	?	0	0.197	-0.353	-0.351	-0.34	-0.319	-0.274	-0.198	-0.122	0	0.006	0.031	0.091	0.197	0	0	0	0	0	0
								Medium_Lowland	PAN2423	120	4	2017-04-12	2017	fallow	0	0	0	?	0	0	0	1	1	1	1	?	?	?	?	0	0.159	-0.343	-0.342	-0.332	-0.313	-0.271	-0.198	-0.119	0	0.004	0.023	0.071	0.159	0	0	0	0	0	0
								Medium_Lowland	PAN2423	120	4	2017-04-13	2017	fallow	0	0	0	?	0	0	0	1	1	1	1	?	?	?	?	0	0.128	-0.335	-0.334	-0.325	-0.307	-0.268	-0.197	-0.117	0	0.003	0.017	0.055	0.128	0	0	0	0	0	0
								Medium_Lowland	PAN2423	120	4	2017-04-14	2017	fallow	0	0	0	?	0	0	0	1	1	1	1	?	?	?	?	0	0.102	-0.327	-0.326	-0.318	-0.301	-0.264	-0.196	-0.114	-0.004	0.002	0.012	0.042	0.102	0	0	0	0	0	0
								Medium_Lowland	PAN2423	120	4	2017-04-15	2017	fallow	0	0	0	?	0	0	0	1	1	1	1	?	?	?	?	0	0.081	-0.319	-0.319	-0.311	-0.296	-0.261	-0.194	-0.112	-0.007	0	0.009	0.032	0.081	0	0	0	0	0	0
								Medium_Lowland	PAN2423	120	4	2017-04-16	2017	fallow	0	0	0	?	0	0.18	0	1	1	1	1	?	?	?	?	0	0.064	-0.312	-0.312	-0.305	-0.291	-0.258	-0.193	-0.11	-0.011	0	0.006	0.024	0.064	0	0	0	0	0	0
								Medium_Lowland	PAN2423	120	4	2017-04-17	2017	fallow	0	0	0	?	0	0.26	0	1	1	1	1	?	?	?	?	0	0.05	-0.306	-0.305	-0.299	-0.286	-0.254	-0.191	-0.108	-0.014	0	0.004	0.018	0.05	0	0	0	0	0	0
								Medium_Lowland	PAN2423	120	4	2017-04-18	2017	fallow	0	0	0	?	0	0.35	0	1	1	1	1	?	?	?	?	0	0.039	-0.3	-0.299	-0.294	-0.281	-0.251	-0.19	-0.107	-0.016	0	0.003	0.014	0.039	0	0	0	0	0	0
								Medium_Lowland	PAN2423	120	4	2017-04-19	2017	fallow	0	0	0	?	0	3.67	0	1	1	1	1	?	?	?	?	0	0.031	0.89	0.417	0.118	-0.11	-0.231	-0.187	-0.106	-0.019	0	0.002	0.01	0.031	0	0	0	0	0	0
								Medium_Lowland	PAN2423	120	4	2017-04-20	2017	fallow	0	0	0	?	0	3.43	0	1	1	1	1	?	?	?	?	0	0.024	0.788	0.52	0.25	0.069	-0.192	-0.184	-0.104	-0.021	0	0.001	0.008	0.024	0	0	0	0	0	0
								Medium_Lowland	PAN2423	120	4	2017-04-21	2017	fallow	0	0	0	?	0	2.95	0	1	1	1	1	?	?	?	?	0	0.018	0.484	0.39	0.252	0.134	-0.149	-0.178	-0.103	-0.023	0	0.001	0.006	0.018	0	0	0	0	0	0
								Medium_Lowland	PAN2423	120	4	2017-04-22	2017	fallow	0	0	0	?	0	6.31	0	1	1	1	1	?	?	?	?	0	0.014	3.836	4.007	1.56	1.071	0.059	-0.163	-0.102	-0.025	0	0.001	0.004	0.014	0	0	0	0	0	0
								Medium_Lowland	PAN2423	120	4	2017-04-23	2017	fallow	0	0	0	?	0	6.16	0	1	1	1	1	?	?	?	?	0	0.011	3.69	3.69	3.69	1.421	0.396	-0.132	-0.1	-0.026	0	0.001	0.003	0.011	0	0	0	0	0	0
								Medium_Lowland	PAN2423	120	4	2017-04-24	2017	fallow	0	0	0	?	0	2.71	0	1	1	1	1	?	?	?	?	0	0.008	0.35	0.57	0.855	1.14	0.804	-0.077	-0.096	-0.027	0	0	0.002	0.008	0	0	0	0	0	0
								Medium_Lowland	PAN2423	120	4	2017-04-25	2017	fallow	0	0	0	?	0	0.72	0	1	1	1	1	?	?	?	?	0	0.006	-0.564	-1.052	0.713	1.048	0.849	-0.015	-0.092	-0.028	0	0	0.002	0.006	0	0	0	0	0	0
								Medium_Lowland	PAN2423	120	4	2017-04-26	2017	fallow	0	0	0	?	0	0.16	0	1	1	1	1	?	?	?	?	0	0.005	-0.842	-0.505	-0.695	0.524	0.331	0.048	-0.086	-0.029	0	0	0.001	0.005	0	0	0	0	0	0
								Medium_Lowland	PAN2423	120	4	2017-04-27	2017	fallow	0	0	0	?	0	0.28	0	1	1	1	1	?	?	?	?	0	0.004	-0.609	-0.643	-0.368	-0.392	0.166	0.094	-0.079	-0.03	0	0	0.001	0.004	0	0	0	0	0	0
								Medium_Lowland	PAN2423	120	4	2017-04-28	2017	fallow	0	0	0	?	0	0.8	0	1	1	1	1	?	?	?	?	0	0.003	-0.617	-0.518	-0.464	-0.331	-0.087	0.054	-0.074	-0.03	0	0	0.001	0.003	0	0	0	0	0	0
								Medium_Lowland	PAN2423	120	4	2017-04-29	2017	fallow	0	0	0	?	0	0.18	0	1	1	1	1	?	?	?	?	0	0.002	-0.546	-0.513	-0.435	-0.336	-0.14	-0.035	-0.071	-0.03	0	0	0	0.002	0	0	0	0	0	0
								Medium_Lowland	PAN2423	120	4	2017-04-30	2017	fallow	0	0	0	?	0	2.06	0	1	1	1	1	?	?	?	?	0	0.002	-0.407	-0.418	-0.383	-0.314	-0.167	-0.046	-0.069	-0.031	0	0	0	0.002	0	0	0	0	0	0
								Medium_Lowland	PAN2423	120	4	2017-05-01	2017	fallow	0	0	0	?	0	12.34	0	1	1	1	1	?	?	?	?	0	0.001	9.527	9.372	7.069	4.341	1.764	0.63	-0.048	-0.03	0	0	0	0.001	0	0	0	0	0	0
								Medium_Lowland	PAN2423	120	4	2017-05-02	2017	fallow	0	0	0	?	0	1.85	0	1	1	1	1	?	?	?	?	0	0.001	-0.327	0.26	0.855	1.14	1.452	0.944	0.258	-0.02	0	0	0	0.001	0	0	0	0	0	0
								Medium_Lowland	PAN2423	120	4	2017-05-03	2017	fallow	0	0	0	?	0	0.81	0	1	1	1	1	?	?	?	?	0	0.001	-0.814	-1.36	0.557	1.14	1.296	1.085	0.589	0	0	0	0	0.001	0	0	0	0	0	0
								Medium_Lowland	PAN2423	120	4	2017-05-04	2017	fallow	0	0	0	?	0	0.09	0	1	1	1	1	?	?	?	?	0	0	-1.083	-0.65	-1.121	0.706	1.001	1.051	0.774	0.028	0	0	0	0	0	0	0	0	0	0
								Medium_Lowland	PAN2423	120	4	2017-05-05	2017	fallow	0	0	0	?	0	0.21	0	1	1	1	1	?	?	?	?	0	0	-0.939	-1.011	-0.578	-0.812	0.501	0.831	0.797	0.056	0	0	0	0	0	0	0	0	0	0
								Medium_Lowland	PAN2423	120	4	2017-05-06	2017	fallow	0	0	0	?	0	0.71	0	1	1	1	1	?	?	?	?	0	0	-0.963	-0.809	-0.81	-0.579	-0.279	0.499	0.678	0.08	0	0	0	0	0	0	0	0	0	0
								Medium_Lowland	PAN2423	120	4	2017-05-07	2017	fallow	0	0	0	?	0	0.47	0	1	1	1	1	?	?	?	?	0	0	-0.843	-0.83	-0.722	-0.596	-0.277	0.187	0.482	0.194	0	0	0	0	0	0	0	0	0	0
								Medium_Lowland	PAN2423	120	4	2017-05-08	2017	fallow	0	0	0	?	0	0.83	0	1	1	1	1	?	?	?	?	0	0.001	-0.773	-0.753	-0.685	-0.569	-0.295	0.002	0.29	0.137	0.024	0.007	0.002	0.001	0	0	0	0	0	0
								Medium_Lowland	PAN2423	120	4	2017-05-09	2017	fallow	0	0	0	?	0	1.93	0	1	1	1	1	?	?	?	?	0	0.003	-0.611	-0.641	-0.61	-0.52	-0.295	-0.141	0.174	0.148	0.061	0.023	0.008	0.003	0	0	0	0	0	0
								Medium_Lowland	PAN2423	120	4	2017-05-10	2017	fallow	0	0	0	?	0	4.66	0	1	1	1	1	?	?	?	?	0	0.008	1.59	1.032	0.367	0.178	-0.179	-0.132	0.048	0.118	0.078	0.04	0.018	0.008	0	0	0	0	0	0
								Medium_Lowland	PAN2423	120	4	2017-05-11	2017	fallow	0	0	0	?	0	4.72	0	1	1	1	1	?	?	?	?	0	0.014	2.25	2.25	0.855	0.559	0.01	-0.115	-0.175	0.083	0.079	0.052	0.028	0.014	0	0	0	0	0	0
								Medium_Lowland	PAN2423	120	4	2017-05-12	2017	fallow	0	0	0	?	0	6.26	0	1	1	1	1	?	?	?	?	0	0.02	3.79	3.79	3.17	1.14	0.369	0	0	0.005	0.057	0.053	0.036	0.02	0	0	0	0	0	0
								Medium_Lowland	PAN2423	120	4	2017-05-13	2017	fallow	0	0	0	?	0	3.8	0	1	1	1	1	?	?	?	?	0	0.026	1.33	1.33	1.33	1.14	0.695	0.278	0.111	0.037	0.051	0.053	0.041	0.026	0	0	0	0	0	0
								Medium_Lowland	PAN2423	120	4	2017-05-14	2017	fallow	0	0	0	?	0	5.26	0	1	1	1	1	?	?	?	?	0	0.032	2.79	2.79	2.79	2.47	1.582	0.8	0.387	0.142	0.078	0.06	0.047	0.032	0	0	0	0	0	0
								Medium_Lowland	PAN2423	120	4	2017-05-15	2017	fallow	0	0	0	?	0	3.49	0	1	1	1	1	?	?	?	?	0	0.04	1.02	1.02	1.02	1.14	1.361	1.024	0.642	0.292	0.142	0.085	0.058	0.04	0	0	0	0	0	0
								Medium_Lowland	PAN2423	120	4	2017-05-16	2017	fallow	0	0	0	?	0	3.99	0	1	1	1	1	?	?	?	?	0	0.052	1.52	1.52	1.52	1.4	1.381	1.167	0.852	0.46	0.238	0.131	0.08	0.052	0	0	0	0	0	0
								Medium_Lowland	PAN2423	120	4	2017-05-17	2017	fallow	0	0	0	?	0	6.98	0	1	1	1	1	?	?	?	?	0	0.071	4.51	4.51	4.51	4.51	2.5	1.7	1.191	0.679	0.37	0.203	0.117	0.071	0	0	0	0	0	0
								Medium_Lowland	PAN2423	120	4	2017-05-18	2017	fallow	0	0	0	?	0	6.53	0	1	1	1	1	?	?	?	?	0	0.102	4.06	4.06	4.06	4.06	2.5	2.02	1.523	0.932	0.539	0.303	0.173	0.102	0	0	0	0	0	0
								Medium_Lowland	PAN2423	120	4	2017-05-19	2017	fallow	0	0	0	?	0	6.69	0	1	1	1	1	?	?	?	?	0	0.147	4.22	4.22	4.22	4.22	4.171	2.88	2.066	1.272	0.759	0.44	0.253	0.147	0	0	0	0	0	0.1
[truncated: 1,291 more rows]
[truncated: 11 more columns]
