# Supplementary material for: Modelling nitrogen management in hybrid rice for coastal ecosystem of West Bengal, India
Source: PeerJ. 2023 Feb 15;11:e14903. doi: 10.7717/peerj.14903 (PMC9938656; doi:10.7717/peerj.14903)
Supplement: Supplemental Information 3 [file peerj-11-14903-s003.xlsx]

## Sheet: Observed Crop Data
																SOIL CHARACTERISATION DATA																															MANAGEMENT IMPOSED
Country	Region	Latitude	Longitude	Easting	Northing	Altitude	Organisation	Date	season	description	treatment	factor1	factor2	factor 3	Replication	BD0-15	BD15-30	BD30-45	BD45-60	BD60-120	%Sand0-15	%Sand15-30	%Sand30-45	%Sand45-60	%Sand60-120	%Loam0-15	%Loam15-30	%Loam30-45	%Loam45-60	%Loam60-120	%Silt0-15	%Silt15-30	%Silt30-45	%Silt45-60	%Silt60-120	%Clay0-15	%Clay15-30	%Clay30-45	%Clay45-60	%Clay60-120	Soil_K+	Soil_Na+	Soil_Ca2+	Soil_Mg2+	Soil_SO42-	Soil_Cl-	crop	variety	sow_date
India	Gosaba	22.154	88.835	689228	2541016	4	BCKV	2016-07-02	1	NO	1				1																																Rice	PAN2423	0
								2016-07-02	1	NO	1				2																																Rice	PAN2424	0
								2016-07-02	1	NO	1				3																																Rice	PAN2425	0
								2016-07-02	1	NO	1				4																																Rice	PAN2426	0
								2016-07-02	1	N40	2				1																																Rice	PAN2423	0
								2016-07-02	1	N40	2				2																																Rice	PAN2424	0
								2016-07-02	1	N40	2				3																																Rice	PAN2425	0
								2016-07-02	1	N40	2				4																																Rice	PAN2426	0
								2016-07-02	1	N80	3				1																																Rice	PAN2423	0
								2016-07-02	1	N80	3				2																																Rice	PAN2424	0
								2016-07-02	1	N80	3				3																																Rice	PAN2425	0
								2016-07-02	1	N80	3				4																																Rice	PAN2426	0
								2016-07-02	1	N120	4				1																																Rice	PAN2423	0
								2016-07-02	1	N120	4				2																																Rice	PAN2424	0
								2016-07-02	1	N120	4				3																																Rice	PAN2425	0
								2016-07-02	1	N120	4				4																																Rice	PAN2426	0
								2016-07-02	1	N160	5				1																																Rice	PAN2423	0
								2016-07-02	1	N160	5				2																																Rice	PAN2424	0
								2016-07-02	1	N160	5				3																																Rice	PAN2425	0
								2016-07-02	1	N160	5				4																																Rice	PAN2426	0
								2016-07-02	1	N120	6				1																																Rice	PAN2423	0
								2016-07-02	1	N120	6				2																																Rice	PAN2424	0
								2016-07-02	1	N120	6				3																																Rice	PAN2425	0
								2016-07-02	1	N120	6				4																																Rice	PAN2426	0
								2016-08-18	1	NO	1				1																																Rice	PAN2423
								2016-08-18	1	NO	1				2																																Rice	PAN2424
								2016-08-18	1	NO	1				3																																Rice	PAN2425
								2016-08-18	1	NO	1				4																																Rice	PAN2426
								2016-08-20	1	N40	2				1																																Rice	PAN2423
								2016-08-20	1	N40	2				2																																Rice	PAN2424
								2016-08-20	1	N40	2				3																																Rice	PAN2425
								2016-08-20	1	N40	2				4																																Rice	PAN2426
								2016-08-21	1	N80	3				1																																Rice	PAN2423
								2016-08-21	1	N80	3				2																																Rice	PAN2424
								2016-08-21	1	N80	3				3																																Rice	PAN2425
								2016-08-21	1	N80	3				4																																Rice	PAN2426
								2016-08-24	1	N120	4				1																																Rice	PAN2423
								2016-08-24	1	N120	4				2																																Rice	PAN2424
								2016-08-24	1	N120	4				3																																Rice	PAN2425
								2016-08-24	1	N120	4				4																																Rice	PAN2426
								2016-08-24	1	N160	5				1																																Rice	PAN2423
								2016-08-24	1	N160	5				2																																Rice	PAN2424
								2016-08-24	1	N160	5				3																																Rice	PAN2425
								2016-08-24	1	N160	5				4																																Rice	PAN2426
								2016-08-24	1	N120	6				1																																Rice	PAN2423
								2016-08-24	1	N120	6				2																																Rice	PAN2424
								2016-08-24	1	N120	6				3																																Rice	PAN2425
								2016-08-24	1	N120	6				4																																Rice	PAN2426
								2016-08-27	1	NO	1				1																																Rice	PAN2423
								2016-08-27	1	NO	1				2																																Rice	PAN2424
								2016-08-27	1	NO	1				3																																Rice	PAN2425
								2016-08-27	1	NO	1				4																																Rice	PAN2426
								2016-08-29	1	N40	2				1																																Rice	PAN2423
								2016-08-29	1	N40	2				2																																Rice	PAN2424
								2016-08-29	1	N40	2				3																																Rice	PAN2425
								2016-08-29	1	N40	2				4																																Rice	PAN2426
								2016-08-30	1	N80	3				1																																Rice	PAN2423
								2016-08-30	1	N80	3				2																																Rice	PAN2424
								2016-08-30	1	N80	3				3																																Rice	PAN2425
								2016-08-30	1	N80	3				4																																Rice	PAN2426
								2016-09-02	1	N120	4				1																																Rice	PAN2423
								2016-09-02	1	N120	4				2																																Rice	PAN2424
								2016-09-02	1	N120	4				3																																Rice	PAN2425
								2016-09-02	1	N120	4				4																																Rice	PAN2426
								2016-09-02	1	N160	5				1																																Rice	PAN2423
								2016-09-02	1	N160	5				2																																Rice	PAN2424
								2016-09-02	1	N160	5				3																																Rice	PAN2425
								2016-09-02	1	N160	5				4																																Rice	PAN2426
								2016-09-02	1	N120	6				1																																Rice	PAN2423
								2016-09-02	1	N120	6				2																																Rice	PAN2424
								2016-09-02	1	N120	6				3																																Rice	PAN2425
								2016-09-02	1	N120	6				4																																Rice	PAN2426
								2016-08-28	1	NO	1				1																																Rice	PAN2423
								2016-08-28	1	NO	1				2																																Rice	PAN2424
								2016-08-28	1	NO	1				3																																Rice	PAN2425
								2016-08-28	1	NO	1				4																																Rice	PAN2426
								2016-09-03	1	N40	2				1																																Rice	PAN2423
								2016-09-03	1	N40	2				2																																Rice	PAN2424
								2016-09-03	1	N40	2				3																																Rice	PAN2425
								2016-09-03	1	N40	2				4																																Rice	PAN2426
								2016-09-03	1	N80	3				1																																Rice	PAN2423
								2016-09-03	1	N80	3				2																																Rice	PAN2424
								2016-09-03	1	N80	3				3																																Rice	PAN2425
								2016-09-03	1	N80	3				4																																Rice	PAN2426
								2016-09-07	1	N120	4				1																																Rice	PAN2423
								2016-09-07	1	N120	4				2																																Rice	PAN2424
								2016-09-07	1	N120	4				3																																Rice	PAN2425
								2016-09-07	1	N120	4				4																																Rice	PAN2426
								2016-09-07	1	N160	5				1																																Rice	PAN2423
								2016-09-07	1	N160	5				2																																Rice	PAN2424
								2016-09-07	1	N160	5				3																																Rice	PAN2425
								2016-09-07	1	N160	5				4																																Rice	PAN2426
								2016-09-07	1	N120	6				1																																Rice	PAN2423
								2016-09-07	1	N120	6				2																																Rice	PAN2424
								2016-09-07	1	N120	6				3																																Rice	PAN2425
								2016-09-07	1	N120	6				4																																Rice	PAN2426
								2016-10-12	1	NO	1				1																																Rice	PAN2423
								2016-10-12	1	NO	1				2																																Rice	PAN2424
								2016-10-12	1	NO	1				3																																Rice	PAN2425
								2016-10-12	1	NO	1				4																																Rice	PAN2426
								2016-10-17	1	N40	2				1																																Rice	PAN2423
								2016-10-17	1	N40	2				2																																Rice	PAN2424
								2016-10-17	1	N40	2				3																																Rice	PAN2425
								2016-10-17	1	N40	2				4																																Rice	PAN2426
								2016-10-17	1	N80	3				1																																Rice	PAN2423
								2016-10-17	1	N80	3				2																																Rice	PAN2424
								2016-10-17	1	N80	3				3																																Rice	PAN2425
								2016-10-17	1	N80	3				4																																Rice	PAN2426
								2016-10-15	1	N120	4				1																																Rice	PAN2423
								2016-10-15	1	N120	4				2																																Rice	PAN2424
								2016-10-15	1	N120	4				3																																Rice	PAN2425
								2016-10-15	1	N120	4				4																																Rice	PAN2426
								2016-10-15	1	N160	5				1																																Rice	PAN2423
								2016-10-15	1	N160	5				2																																Rice	PAN2424
								2016-10-15	1	N160	5				3																																Rice	PAN2425
								2016-10-15	1	N160	5				4																																Rice	PAN2426
								2016-10-15	1	N120	6				1																																Rice	PAN2423
								2016-10-15	1	N120	6				2																																Rice	PAN2424
								2016-10-15	1	N120	6				3																																Rice	PAN2425
								2016-10-15	1	N120	6				4																																Rice	PAN2426
								2016-09-25	1	NO	1				1																																Rice	PAN2423
								2016-09-25	1	NO	1				2																																Rice	PAN2424
								2016-09-25	1	NO	1				3																																Rice	PAN2425
								2016-09-25	1	NO	1				4																																Rice	PAN2426
								2016-09-25	1	N40	2				1																																Rice	PAN2423
								2016-09-25	1	N40	2				2																																Rice	PAN2424
								2016-09-25	1	N40	2				3																																Rice	PAN2425
								2016-09-25	1	N40	2				4																																Rice	PAN2426
								2016-09-25	1	N80	3				1																																Rice	PAN2423
								2016-09-25	1	N80	3				2																																Rice	PAN2424
								2016-09-25	1	N80	3				3																																Rice	PAN2425
								2016-09-25	1	N80	3				4																																Rice	PAN2426
								2016-09-25	1	N120	4				1																																Rice	PAN2423
								2016-09-25	1	N120	4				2																																Rice	PAN2424
								2016-09-25	1	N120	4				3																																Rice	PAN2425
								2016-09-25	1	N120	4				4																																Rice	PAN2426
								2016-09-25	1	N160	5				1																																Rice	PAN2423
								2016-09-25	1	N160	5				2																																Rice	PAN2424
								2016-09-25	1	N160	5				3																																Rice	PAN2425
								2016-09-25	1	N160	5				4																																Rice	PAN2426
								2016-09-25	1	N120	6				1																																Rice	PAN2423
								2016-09-25	1	N120	6				2																																Rice	PAN2424
								2016-09-25	1	N120	6				3																																Rice	PAN2425
								2016-09-25	1	N120	6				4																																Rice	PAN2426
								2016-10-10	1	NO	1				1																																Rice	PAN2423
								2016-10-10	1	NO	1				2																																Rice	PAN2424
								2016-10-10	1	NO	1				3																																Rice	PAN2425
								2016-10-10	1	NO	1				4																																Rice	PAN2426
								2016-10-10	1	N40	2				1																																Rice	PAN2423
								2016-10-10	1	N40	2				2																																Rice	PAN2424
								2016-10-10	1	N40	2				3																																Rice	PAN2425
								2016-10-10	1	N40	2				4																																Rice	PAN2426
								2016-10-10	1	N80	3				1																																Rice	PAN2423
								2016-10-10	1	N80	3				2																																Rice	PAN2424
								2016-10-10	1	N80	3				3																																Rice	PAN2425
								2016-10-10	1	N80	3				4																																Rice	PAN2426
								2016-10-10	1	N120	4				1																																Rice	PAN2423
								2016-10-10	1	N120	4				2																																Rice	PAN2424
								2016-10-10	1	N120	4				3																																Rice	PAN2425
								2016-10-10	1	N120	4				4																																Rice	PAN2426
								2016-10-10	1	N160	5				1																																Rice	PAN2423
								2016-10-10	1	N160	5				2																																Rice	PAN2424
								2016-10-10	1	N160	5				3																																Rice	PAN2425
								2016-10-10	1	N160	5				4																																Rice	PAN2426
								2016-10-10	1	N120	6				1																																Rice	PAN2423
								2016-10-10	1	N120	6				2																																Rice	PAN2424
								2016-10-10	1	N120	6				3																																Rice	PAN2425
								2016-10-10	1	N120	6				4																																Rice	PAN2426
								2016-10-30	1	NO	1				1																																Rice	PAN2423
								2016-10-30	1	NO	1				2																																Rice	PAN2424
								2016-10-30	1	NO	1				3																																Rice	PAN2425
								2016-10-30	1	NO	1				4																																Rice	PAN2426
								2016-10-30	1	N40	2				1																																Rice	PAN2423
								2016-10-30	1	N40	2				2																																Rice	PAN2424
								2016-10-30	1	N40	2				3																																Rice	PAN2425
								2016-10-30	1	N40	2				4																																Rice	PAN2426
								2016-10-30	1	N80	3				1																																Rice	PAN2423
								2016-10-30	1	N80	3				2																																Rice	PAN2424
								2016-10-30	1	N80	3				3																																Rice	PAN2425
								2016-10-30	1	N80	3				4																																Rice	PAN2426
								2016-10-30	1	N120	4				1																																Rice	PAN2423
								2016-10-30	1	N120	4				2																																Rice	PAN2424
								2016-10-30	1	N120	4				3																																Rice	PAN2425
								2016-10-30	1	N120	4				4																																Rice	PAN2426
								2016-10-30	1	N160	5				1																																Rice	PAN2423
								2016-10-30	1	N160	5				2																																Rice	PAN2424
								2016-10-30	1	N160	5				3																																Rice	PAN2425
								2016-10-30	1	N160	5				4																																Rice	PAN2426
								2016-10-30	1	N120	6				1																																Rice	PAN2423
								2016-10-30	1	N120	6				2																																Rice	PAN2424
								2016-10-30	1	N120	6				3																																Rice	PAN2425
								2016-10-30	1	N120	6				4																																Rice	PAN2426
								2017-07-03	2	NO	1				1																																Rice	PAN2423	0
								2017-07-03	2	NO	1				2																																Rice	PAN2424	0
								2017-07-03	2	NO	1				3																																Rice	PAN2425	0
								2017-07-03	2	NO	1				4																																Rice	PAN2426	0
								2017-07-03	2	N40	2				1																																Rice	PAN2423	0
								2017-07-03	2	N40	2				2																																Rice	PAN2424	0
								2017-07-03	2	N40	2				3																																Rice	PAN2425	0
								2017-07-03	2	N40	2				4																																Rice	PAN2426	0
								2017-07-03	2	N80	3				1																																Rice	PAN2423	0
								2017-07-03	2	N80	3				2																																Rice	PAN2424	0
								2017-07-03	2	N80	3				3																																Rice	PAN2425	0
								2017-07-03	2	N80	3				4																																Rice	PAN2426	0
								2017-07-03	2	N120	4				1																																Rice	PAN2423	0
								2017-07-03	2	N120	4				2																																Rice	PAN2424	0
								2017-07-03	2	N120	4				3																																Rice	PAN2425	0
								2017-07-03	2	N120	4				4																																Rice	PAN2426	0
								2017-07-03	2	N160	5				1																																Rice	PAN2423	0
								2017-07-03	2	N160	5				2																																Rice	PAN2424	0
								2017-07-03	2	N160	5				3																																Rice	PAN2425	0
								2017-07-03	2	N160	5				4																																Rice	PAN2426	0
								2017-07-03	2	N120	6				1																																Rice	PAN2423	0
								2017-07-03	2	N120	6				2																																Rice	PAN2424	0
								2017-07-03	2	N120	6				3																																Rice	PAN2425	0
								2017-07-03	2	N120	6				4																																Rice	PAN2426	0
								2017-08-19	2	NO	1				1																																Rice	PAN2423
								2017-08-19	2	NO	1				2																																Rice	PAN2424
								2017-08-19	2	NO	1				3																																Rice	PAN2425
								2017-08-19	2	NO	1				4																																Rice	PAN2426
								2017-08-20	2	N40	2				1																																Rice	PAN2423
								2017-08-20	2	N40	2				2																																Rice	PAN2424
								2017-08-20	2	N40	2				3																																Rice	PAN2425
								2017-08-20	2	N40	2				4																																Rice	PAN2426
								2017-08-22	2	N80	3				1																																Rice	PAN2423
								2017-08-22	2	N80	3				2																																Rice	PAN2424
								2017-08-22	2	N80	3				3																																Rice	PAN2425
								2017-08-22	2	N80	3				4																																Rice	PAN2426
								2017-08-25	2	N120	4				1																																Rice	PAN2423
								2017-08-25	2	N120	4				2																																Rice	PAN2424
								2017-08-25	2	N120	4				3																																Rice	PAN2425
								2017-08-25	2	N120	4				4																																Rice	PAN2426
								2017-08-25	2	N160	5				1																																Rice	PAN2423
								2017-08-25	2	N160	5				2																																Rice	PAN2424
								2017-08-25	2	N160	5				3																																Rice	PAN2425
								2017-08-25	2	N160	5				4																																Rice	PAN2426
								2017-08-25	2	N120	6				1																																Rice	PAN2423
								2017-08-25	2	N120	6				2																																Rice	PAN2424
								2017-08-25	2	N120	6				3																																Rice	PAN2425
								2017-08-25	2	N120	6				4																																Rice	PAN2426
								2017-08-27	2	NO	1				1																																Rice	PAN2423
								2017-08-27	2	NO	1				2																																Rice	PAN2424
								2017-08-27	2	NO	1				3																																Rice	PAN2425
								2017-08-27	2	NO	1				4																																Rice	PAN2426
								2017-08-29	2	N40	2				1																																Rice	PAN2423
								2017-08-29	2	N40	2				2																																Rice	PAN2424
								2017-08-29	2	N40	2				3																																Rice	PAN2425
								2017-08-29	2	N40	2				4																																Rice	PAN2426
								2017-08-30	2	N80	3				1																																Rice	PAN2423
								2017-08-30	2	N80	3				2																																Rice	PAN2424
								2017-08-30	2	N80	3				3																																Rice	PAN2425
								2017-08-30	2	N80	3				4																																Rice	PAN2426
								2017-09-03	2	N120	4				1																																Rice	PAN2423
								2017-09-03	2	N120	4				2																																Rice	PAN2424
								2017-09-03	2	N120	4				3																																Rice	PAN2425
								2017-09-03	2	N120	4				4																																Rice	PAN2426
								2017-09-03	2	N160	5				1																																Rice	PAN2423
								2017-09-03	2	N160	5				2																																Rice	PAN2424
								2017-09-03	2	N160	5				3																																Rice	PAN2425
								2017-09-03	2	N160	5				4																																Rice	PAN2426
								2017-09-03	2	N120	6				1																																Rice	PAN2423
								2017-09-03	2	N120	6				2																																Rice	PAN2424
								2017-09-03	2	N120	6				3																																Rice	PAN2425
								2017-09-03	2	N120	6				4																																Rice	PAN2426
								2017-08-28	2	NO	1				1																																Rice	PAN2423
								2017-08-28	2	NO	1				2																																Rice	PAN2424
								2017-08-28	2	NO	1				3																																Rice	PAN2425
								2017-08-28	2	NO	1				4																																Rice	PAN2426
								2017-09-04	2	N40	2				1																																Rice	PAN2423
								2017-09-04	2	N40	2				2																																Rice	PAN2424
								2017-09-04	2	N40	2				3																																Rice	PAN2425
								2017-09-04	2	N40	2				4																																Rice	PAN2426
								2017-09-04	2	N80	3				1																																Rice	PAN2423
								2017-09-04	2	N80	3				2																																Rice	PAN2424
								2017-09-04	2	N80	3				3																																Rice	PAN2425
								2017-09-04	2	N80	3				4																																Rice	PAN2426
								2017-09-08	2	N120	4				1																																Rice	PAN2423
								2017-09-08	2	N120	4				2																																Rice	PAN2424
								2017-09-08	2	N120	4				3																																Rice	PAN2425
								2017-09-08	2	N120	4				4																																Rice	PAN2426
								2017-09-08	2	N160	5				1																																Rice	PAN2423
								2017-09-08	2	N160	5				2																																Rice	PAN2424
								2017-09-08	2	N160	5				3																																Rice	PAN2425
								2017-09-08	2	N160	5				4																																Rice	PAN2426
								2017-09-08	2	N120	6				1																																Rice	PAN2423
								2017-09-08	2	N120	6				2																																Rice	PAN2424
								2017-09-08	2	N120	6				3																																Rice	PAN2425
								2017-09-08	2	N120	6				4																																Rice	PAN2426
								2017-10-13	2	NO	1				1																																Rice	PAN2423
								2017-10-13	2	NO	1				2																																Rice	PAN2424
								2017-10-13	2	NO	1				3																																Rice	PAN2425
								2017-10-13	2	NO	1				4																																Rice	PAN2426
								2017-10-17	2	N40	2				1																																Rice	PAN2423
								2017-10-17	2	N40	2				2																																Rice	PAN2424
								2017-10-17	2	N40	2				3																																Rice	PAN2425
								2017-10-17	2	N40	2				4																																Rice	PAN2426
								2017-10-17	2	N80	3				1																																Rice	PAN2423
								2017-10-17	2	N80	3				2																																Rice	PAN2424
								2017-10-17	2	N80	3				3																																Rice	PAN2425
								2017-10-17	2	N80	3				4																																Rice	PAN2426
								2017-10-16	2	N120	4				1																																Rice	PAN2423
								2017-10-16	2	N120	4				2																																Rice	PAN2424
								2017-10-16	2	N120	4				3																																Rice	PAN2425
								2017-10-16	2	N120	4				4																																Rice	PAN2426
								2017-10-15	2	N160	5				1																																Rice	PAN2423
								2017-10-15	2	N160	5				2																																Rice	PAN2424
								2017-10-15	2	N160	5				3																																Rice	PAN2425
								2017-10-15	2	N160	5				4																																Rice	PAN2426
								2017-10-15	2	N200	6				1																																Rice	PAN2423
								2017-10-15	2	N200	6				2																																Rice	PAN2424
								2017-10-15	2	N200	6				3																																Rice	PAN2425
								2017-10-15	2	N200	6				4																																Rice	PAN2426
								2017-09-27	2	NO	1				1																																Rice	PAN2423
								2017-09-27	2	NO	1				2																																Rice	PAN2424
								2017-09-27	2	NO	1				3																																Rice	PAN2425
								2017-09-27	2	NO	1				4																																Rice	PAN2426
								2017-09-27	2	N40	2				1																																Rice	PAN2423
								2017-09-27	2	N40	2				2																																Rice	PAN2424
								2017-09-27	2	N40	2				3																																Rice	PAN2425
								2017-09-27	2	N40	2				4																																Rice	PAN2426
								2017-09-27	2	N80	3				1																																Rice	PAN2423
								2017-09-27	2	N80	3				2																																Rice	PAN2424
								2017-09-27	2	N80	3				3																																Rice	PAN2425
								2017-09-27	2	N80	3				4																																Rice	PAN2426
								2017-09-27	2	N120	4				1																																Rice	PAN2423
								2017-09-27	2	N120	4				2																																Rice	PAN2424
								2017-09-27	2	N120	4				3																																Rice	PAN2425
								2017-09-27	2	N120	4				4																																Rice	PAN2426
								2017-09-27	2	N160	5				1																																Rice	PAN2423
								2017-09-27	2	N160	5				2																																Rice	PAN2424
								2017-09-27	2	N160	5				3																																Rice	PAN2425
								2017-09-27	2	N160	5				4																																Rice	PAN2426
								2017-09-27	2	N120	6				1																																Rice	PAN2423
								2017-09-27	2	N120	6				2																																Rice	PAN2424
								2017-09-27	2	N120	6				3																																Rice	PAN2425
								2017-09-27	2	N120	6				4																																Rice	PAN2426
								2017-10-11	2	NO	1				1																																Rice	PAN2423
								2017-10-11	2	NO	1				2																																Rice	PAN2424
								2017-10-11	2	NO	1				3																																Rice	PAN2425
								2017-10-11	2	NO	1				4																																Rice	PAN2426
								2017-10-11	2	N40	2				1																																Rice	PAN2423
								2017-10-11	2	N40	2				2																																Rice	PAN2424
								2017-10-11	2	N40	2				3																																Rice	PAN2425
								2017-10-11	2	N40	2				4																																Rice	PAN2426
								2017-10-11	2	N80	3				1																																Rice	PAN2423
								2017-10-11	2	N80	3				2																																Rice	PAN2424
								2017-10-11	2	N80	3				3																																Rice	PAN2425
								2017-10-11	2	N80	3				4																																Rice	PAN2426
								2017-10-11	2	N120	4				1																																Rice	PAN2423
								2017-10-11	2	N120	4				2																																Rice	PAN2424
								2017-10-11	2	N120	4				3																																Rice	PAN2425
								2017-10-11	2	N120	4				4																																Rice	PAN2426
								2017-10-11	2	N160	5				1																																Rice	PAN2423
								2017-10-11	2	N160	5				2																																Rice	PAN2424
								2017-10-11	2	N160	5				3																																Rice	PAN2425
								2017-10-11	2	N160	5				4																																Rice	PAN2426
								2017-10-11	2	N120	6				1																																Rice	PAN2423
								2017-10-11	2	N120	6				2																																Rice	PAN2424
								2017-10-11	2	N120	6				3																																Rice	PAN2425
								2017-10-11	2	N120	6				4																																Rice	PAN2426
								2017-10-26	2	NO	1				1																																Rice	PAN2423
								2017-10-26	2	NO	1				2																																Rice	PAN2424
								2017-10-26	2	NO	1				3																																Rice	PAN2425
								2017-10-26	2	NO	1				4																																Rice	PAN2426
								2017-10-26	2	N40	2				1																																Rice	PAN2423
								2017-10-26	2	N40	2				2																																Rice	PAN2424
								2017-10-26	2	N40	2				3																																Rice	PAN2425
								2017-10-26	2	N40	2				4																																Rice	PAN2426
								2017-10-28	2	N80	3				1																																Rice	PAN2423
								2017-10-28	2	N80	3				2																																Rice	PAN2424
								2017-10-28	2	N80	3				3																																Rice	PAN2425
								2017-10-28	2	N80	3				4																																Rice	PAN2426
								2017-10-29	2	N120	4				1																																Rice	PAN2423
								2017-10-29	2	N120	4				2																																Rice	PAN2424
								2017-10-29	2	N120	4				3																																Rice	PAN2425
								2017-10-29	2	N120	4				4																																Rice	PAN2426
								2017-10-29	2	N160	5				1																																Rice	PAN2423
								2017-10-29	2	N160	5				2																																Rice	PAN2424
								2017-10-29	2	N160	5				3																																Rice	PAN2425
								2017-10-29	2	N160	5				4																																Rice	PAN2426
								2017-10-29	2	N120	6				1																																Rice	PAN2423
								2017-10-29	2	N120	6				2																																Rice	PAN2424
								2017-10-29	2	N120	6				3																																Rice	PAN2425
								2017-10-29	2	N120	6				4																																Rice	PAN2426
[truncated: 117 more columns]
