# Supplementary material for: Modelling nitrogen management in hybrid rice for coastal ecosystem of West Bengal, India
Source: PeerJ. 2023 Feb 15;11:e14903. doi: 10.7717/peerj.14903 (PMC9938656; doi:10.7717/peerj.14903)
Supplement: Supplemental Information 4 [file peerj-11-14903-s004.xlsx]

## Sheet: Sheet2
year	day	rain	maxt	mint	rh	radn	month
()	()	(mm)	(oC)	(oC)	(%)	(MJ/m2)	()
1989	1	0	27.25	13.33	55.07	16.42	1
1989	2	0	26.4	13.13	54.13	14.72	1
1989	3	0	27.27	13.32	51.59	15.23	1
1989	4	0.06	26.83	16.29	56.85	13.64	1
1989	5	0.01	26.99	13.35	52.77	15.8	1
1989	6	0	27.53	14.07	47.17	16.02	1
1989	7	0	27.85	13.5	57.53	13.28	1
1989	8	0	28.27	16.34	62.81	15.34	1
1989	9	0	28.1	15.35	62.62	15.3	1
1989	10	0	25.17	12.28	45.35	17.03	1
1989	11	0	24.25	9.51	40.03	17.28	1
1989	12	0	23.18	8.7	38.88	17.39	1
1989	13	0	23.08	7.41	37.09	16.96	1
1989	14	0	24.34	7.16	35.3	16.56	1
1989	15	0	25.9	8.8	34.75	16.81	1
1989	16	0	25.67	9.24	37.39	16.27	1
1989	17	0	25.7	9.83	39.07	12.74	1
1989	18	0	25.56	9.57	36.88	16.09	1
1989	19	0	24.93	8.79	35.33	16.38	1
1989	20	0	25.85	10.61	33.53	16.31	1
1989	21	0	25.69	9.7	38.29	16.92	1
1989	22	0	24.76	8.06	37.13	17.89	1
1989	23	0	24.77	8.66	36.91	17.32	1
1989	24	0	25.65	8.59	31.8	17.14	1
1989	25	0	26.68	8.56	28.58	17.93	1
1989	26	0	27.18	9.68	28.06	18	1
1989	27	0	27.77	9.71	31.61	18.32	1
1989	28	0	27.5	9.45	33.33	18.18	1
1989	29	0	28.37	10.44	31.87	18.54	1
1989	30	0	27.43	9.31	30.32	18.5	1
1989	31	0	28.48	10.02	31.37	18.07	1
1989	32	0	29.71	11.44	37.31	16.31	2
1989	33	0	30.9	13.1	45.65	16.78	2
1989	34	0	30.16	12.88	38.54	18	2
1989	35	0	30.56	11.86	32.17	18.14	2
1989	36	0	32	14.6	46.59	17.5	2
1989	37	0	33.22	17.1	57.84	15.48	2
1989	38	0	33.65	19.23	57.23	18.22	2
1989	39	0	32.64	17.44	46.09	17.89	2
1989	40	0	31.65	15.78	36.64	18.72	2
1989	41	0	32.32	16.85	56.53	16.7	2
1989	42	0	32.01	17.11	48.06	16.92	2
1989	43	0.11	30.84	18.51	54.55	17.5	2
1989	44	0.88	30.7	16.04	39.34	18.86	2
1989	45	0	31.39	16.99	60.87	17.1	2
1989	46	0	32.33	17.93	43.62	19.08	2
1989	47	0.38	31.71	16.1	38.43	18.4	2
1989	48	0	33.17	19.46	51.45	19.87	2
1989	49	0	32.67	20.1	65.44	17.35	2
1989	50	0.17	33.21	20.71	49.13	16.88	2
1989	51	0	28.02	13.21	22.09	18.9	2
1989	52	0.02	29.04	14.25	24.26	20.3	2
1989	53	0	30.06	16.36	46.22	16.02	2
1989	54	0.85	30.78	15.99	35.44	21.1	2
1989	55	1.72	29.25	12.89	27.11	20.99	2
1989	56	0	31.39	13.78	27.99	21.1	2
1989	57	0	32.16	14.1	26.36	21.74	2
1989	58	0	34.26	17.81	23.1	21.85	2
1989	59	0	36.06	17.77	39.3	21.17	2
1989	60	0	36.18	19.15	48.94	18.83	2
1989	61	0	35.8	19.17	49.73	18.79	3
1989	62	0	35.39	18.9	38.97	19.87	3
1989	63	0	33.77	16.1	28.45	20.3	3
1989	64	0	34.44	15.9	39.63	20.59	3
1989	65	0	34.74	17.72	43.75	20.16	3
1989	66	0	35.15	20.05	42.2	19.44	3
1989	67	0	35.76	19.41	52.08	20.56	3
1989	68	0	35.78	21.01	52.13	19.62	3
1989	69	0	36.01	21.39	52.56	21.28	3
1989	70	0	31.25	22.51	52.07	10.4	3
1989	71	0	32.68	19.31	43.81	19.12	3
1989	72	0.09	33.01	20.89	49.01	19.58	3
1989	73	2.31	33.28	22.66	47.95	20.56	3
1989	74	0.07	34.95	21.42	41.76	20.16	3
1989	75	0.92	35.25	20.28	50.61	22.18	3
1989	76	0	36.41	22.36	47.48	22.1	3
1989	77	0	35.99	20.4	30.46	23.4	3
1989	78	0	37.78	20.98	42.87	21.64	3
1989	79	0	37.45	22.34	41.84	24.19	3
1989	80	0	38.46	21.26	39.28	21.2	3
1989	81	0	39.88	23.8	42.99	22.43	3
1989	82	0	40.41	22.91	37.38	22.54	3
1989	83	0	39.18	23.76	36.72	19.51	3
1989	84	0	39.79	22.12	38.75	20.77	3
1989	85	0	39.22	23.99	44.28	24.05	3
1989	86	0	39.48	24.67	42.65	23.22	3
1989	87	0	33.69	23.17	33.4	21.17	3
1989	88	0.02	33.49	23.73	37.56	10.58	3
1989	89	0	33.88	23.4	42.66	23.8	3
1989	90	2.66	34.71	22.51	52.88	22.28	3
1989	91	0	36.23	23.49	54.57	22	3
1989	92	0	39.27	25.07	54.33	23.51	4
1989	93	0	39.4	24.73	45.68	23.54	4
1989	94	0.01	39.41	23.3	40.51	23.76	4
1989	95	0	38.79	22.6	44.75	24.62	4
1989	96	0	38.61	22.08	35.54	24.55	4
1989	97	0	38.73	20.54	37.19	24.84	4
1989	98	0	39.59	21.92	42.55	23.9	4
1989	99	0	38.48	22.89	53.4	24.55	4
1989	100	0	38.35	23.59	60.28	23.11	4
1989	101	0	40.75	24.46	49.41	23.26	4
1989	102	0	39.83	24.44	46.53	26.06	4
1989	103	0	39.78	23.64	46.14	26.75	4
1989	104	0	39.92	24.83	51.77	25.38	4
1989	105	0	41.49	24.7	48.14	26.82	4
1989	106	0	40.34	25.41	54.67	24.55	4
1989	107	0.02	39.63	26.17	58.32	25.38	4
1989	108	0.01	40.44	25.59	53.93	25.78	4
1989	109	0	37.97	26.05	62.47	24.48	4
1989	110	0	40.65	26.31	51.74	24.3	4
1989	111	0	41.72	26.12	48.76	19.73	4
1989	112	0	43.06	25.73	45.96	27.29	4
1989	113	0	36.06	25.92	67.95	24.84	4
1989	114	0	41.2	25.8	55.58	25.16	4
1989	115	0	41.03	26.52	54.21	23	4
1989	116	0.09	40.88	27.13	54.9	23.69	4
1989	117	0.25	39.87	27.29	57.25	24.44	4
1989	118	0.92	37.1	27.26	64.67	19.76	4
1989	119	0.78	37.1	27.07	64.83	20.88	4
1989	120	10.56	36.46	26.63	67.41	24.26	4
1989	121	2.39	36.43	25.96	67.99	21.85	4
1989	122	0	36.06	25.96	68.99	24.44	5
1989	123	0	38.35	26.62	65.81	24.16	5
1989	124	0	42.4	26.55	50.97	26.57	5
1989	125	0	42.08	27	50.59	26.42	5
1989	126	0	41.87	26.42	51.53	25.27	5
1989	127	0	40.1	26.4	56.4	25.63	5
1989	128	0	41.68	27.11	50.55	25.63	5
1989	129	0	41.98	26.63	48.84	25.13	5
1989	130	0	40.27	26.4	56.69	23.26	5
1989	131	0	38.63	26.04	59.65	25.67	5
1989	132	0	36.71	26.65	63.18	23.72	5
1989	133	0.01	35.35	27.18	65.21	21.96	5
1989	134	1.89	36.81	26.49	61.94	23.98	5
1989	135	4.34	36.45	27.47	66.59	18.36	5
1989	136	0.64	35.59	27.53	67.55	19.15	5
1989	137	2.62	34.4	27.29	68.81	9.04	5
1989	138	5.53	32.39	26.72	77.03	18.61	5
1989	139	2.6	33.03	26.14	73.67	22.21	5
1989	140	1.57	37.19	25.46	61.11	23.26	5
1989	141	0.02	37.37	26.44	62.39	19.73	5
1989	142	0.62	38.46	26.18	59.28	20.34	5
1989	143	0.51	33.41	27.84	68.31	20.41	5
1989	144	1.24	33.57	27.51	70.87	19.01	5
1989	145	5.67	32.65	27.72	74.6	13.93	5
1989	146	4.65	33.36	27.37	73.69	11.27	5
1989	147	31.46	30.35	27.59	76.36	8.39	5
1989	148	14.58	35.92	27.82	72.84	20.09	5
1989	149	1.67	36.15	26.77	70.63	20.12	5
1989	150	0.01	35.27	26.79	70.47	19.19	5
1989	151	6.5	34.4	26	73.67	20.38	5
1989	152	4.15	34.3	26.3	73.21	20.84	5
1989	153	0.01	33.49	26.4	75.41	20.3	6
1989	154	0.02	33.93	27.09	77.17	20.34	6
1989	155	14.69	31.48	26.8	82.41	19.91	6
1989	156	7.31	31.31	26.7	84.36	19.48	6
1989	157	0.6	34.98	26.69	74.61	20.09	6
1989	158	1.94	34.89	26.45	73.02	21.02	6
1989	159	3.58	34.85	26.47	74.33	22.07	6
1989	160	0.86	36.69	27.14	70.02	24.66	6
1989	161	0.1	37.19	27.12	65.57	22.5	6
1989	162	0.03	34.03	27.85	70.54	19.62	6
1989	163	0.05	33.01	27.89	76.06	11.88	6
1989	164	4.82	33.04	27.45	76.41	5.76	6
1989	165	23.11	32.01	27.91	79.69	11.88	6
1989	166	30.01	33.18	27.92	80.91	9.32	6
1989	167	10.4	29.91	26.95	86.04	8.96	6
1989	168	22.3	29.52	26.46	86.67	11.05	6
1989	169	17.92	30.51	25.93	85.29	15.05	6
1989	170	7.13	32.06	25.25	81.55	14.08	6
1989	171	23.36	29.63	26.14	87.63	12.06	6
1989	172	22.65	30.91	26.71	84.29	9.07	6
1989	173	27.64	30.56	26.46	87.31	10.94	6
1989	174	9.37	31.62	26.08	86.74	19.51	6
1989	175	0.33	30.5	26.73	87.12	18.4	6
1989	176	2.08	29.46	26.86	89.1	16.6	6
1989	177	1.7	31.83	26.45	83.52	12.56	6
1989	178	0.87	32.07	26.21	81.98	19.37	6
1989	179	1.57	31.91	26.84	83	18.07	6
1989	180	2.45	31.07	26.52	82.91	17.68	6
1989	181	7.59	31.51	26.2	81.66	15.8	6
1989	182	15.11	30.51	26.69	87.94	6.48	6
1989	183	18.36	30.88	26.94	88.51	8.6	7
1989	184	18.61	30.66	26.87	87.48	14.36	7
1989	185	13.98	30.93	26.64	87.97	15.44	7
1989	186	1.91	29.54	26.69	90.27	10.87	7
1989	187	16.5	29.96	26.4	89.03	14.54	7
1989	188	11.76	30.38	25.96	85.06	11.45	7
1989	189	1.35	30.81	26.01	84.98	17.14	7
1989	190	0.12	31.68	26.34	81.79	20.59	7
1989	191	0	32.52	26.25	83.51	21.28	7
1989	192	0.15	33.15	27.24	83.7	21.02	7
1989	193	8.34	30.41	27.02	89.26	17.06	7
1989	194	15.39	29.24	26.27	89.88	5.8	7
1989	195	15.74	29.86	26.08	87.22	6.66	7
1989	196	10.66	30.42	25.9	86.28	19.19	7
1989	197	4.54	30.56	25.94	86.54	16.16	7
1989	198	0.55	31.24	25.91	85.51	18.47	7
1989	199	0.27	30.86	26.61	86.45	20.05	7
1989	200	14.3	33.53	26.51	80.56	16.78	7
1989	201	18.54	32.51	27.2	83.03	17.57	7
1989	202	3.33	32.14	26.28	84.83	15.8	7
1989	203	6.34	30.89	25.96	85.12	18.22	7
1989	204	3.11	31.19	26.09	83.29	18.72	7
1989	205	7.22	31.51	26.02	84.94	12.53	7
1989	206	11.37	32.13	26.15	84.94	17.39	7
1989	207	2.97	33.37	26.79	82.51	21.42	7
1989	208	6.23	32.03	27.32	87.73	17.86	7
1989	209	5.46	29.65	27.43	91.15	11.05	7
1989	210	22.31	29.74	26.8	89.78	3.78	7
1989	211	25.56	29.4	25.67	87.98	13.39	7
1989	212	10.53	29.75	25.26	87.88	6.23	7
1989	213	35.42	28.04	24.99	91.52	6.98	7
1989	214	26.34	29.41	24.94	90.58	13.5	8
1989	215	23.29	29.3	25.19	92.56	12.1	8
1989	216	29.34	29.57	25.8	91.07	14.9	8
1989	217	9.29	30.18	25.95	89.09	16.27	8
1989	218	9.46	30.31	25.61	88.93	15.66	8
1989	219	1.12	30.75	26.03	86.37	19.66	8
1989	220	0.7	31.15	25.54	86.63	13.1	8
1989	221	0.15	30.51	25.67	88.51	18.76	8
1989	222	1.51	30.22	25.5	88.44	15.62	8
1989	223	1.44	30.27	26.04	89.69	16.52	8
1989	224	1.46	29.98	26.3	90.93	12.13	8
1989	225	3.48	30.34	26.55	87.33	18.47	8
1989	226	3.22	30.67	26.17	87.54	18.25	8
1989	227	0.49	30.57	26.37	87.63	14.94	8
1989	228	6.6	30.14	26.29	89.1	16.63	8
1989	229	2.63	29.95	25.96	86.8	10.37	8
1989	230	1.17	31.25	25.93	85.13	19.22	8
1989	231	1.8	31.49	25.8	84.92	19.58	8
1989	232	1.88	30.45	26.12	88.02	16.63	8
1989	233	3.11	29.74	26.24	91.17	16.2	8
1989	234	1.72	30.66	26.09	88.01	17.39	8
1989	235	2.73	31.18	25.83	86.87	16.06	8
1989	236	7.55	29.76	26.19	89.31	12.6	8
1989	237	9.72	30.45	26.05	88.21	17.5	8
1989	238	3.21	31.11	25.62	86.51	17.78	8
1989	239	0.61	31.47	26.21	86.61	17.86	8
1989	240	0.05	31.62	26.21	85.95	20.2	8
1989	241	5.06	31.09	26.38	86.57	18.07	8
1989	242	3.7	30.59	26.47	90.31	15.37	8
1989	243	6.52	29.93	26.21	87.29	15.88	8
1989	244	4.4	29.46	26.01	87.54	10.84	8
1989	245	4.31	31.29	25.8	85.19	17.6	9
1989	246	2.41	31.65	26.41	86.35	17.71	9
1989	247	0.28	31.23	26.78	87.47	10.84	9
1989	248	1.22	31.2	26.98	85.6	2.92	9
1989	249	5.47	32.24	25.68	81.64	14.44	9
1989	250	3.02	31.9	25.83	82.53	16.2	9
1989	251	20.74	31.56	26.01	84.63	11.63	9
1989	252	9.33	31.39	26.32	84.81	17.17	9
1989	253	0.04	31.35	26.36	83.78	7.85	9
1989	254	11.61	30.24	25.94	89.37	13.28	9
1989	255	13.6	30	26.39	90.83	6.55	9
1989	256	10.1	29.86	26.65	90.51	7.24	9
1989	257	13.35	30.91	26.45	88.26	11.3	9
1989	258	3.88	31.55	26.1	87.29	15.73	9
1989	259	0.45	30.88	25.94	85.88	18.07	9
1989	260	0.3	30.89	25.34	86.62	18.36	9
1989	261	2.9	29.54	25.92	90.53	15.59	9
1989	262	1.67	29.27	25.87	89.49	15.91	9
1989	263	1.27	30.57	25.53	87.51	14.51	9
1989	264	18.91	29.94	25.32	89.78	18.43	9
1989	265	13.17	29.39	25.97	90.54	12.38	9
1989	266	5.18	28.37	25.72	91.36	12.85	9
1989	267	4.17	28.77	24.98	90.06	15.23	9
1989	268	2.32	30.82	24.36	84.87	15.52	9
1989	269	6.35	30.06	25.46	86.82	10.04	9
1989	270	16.25	28.09	25.89	91.77	9.32	9
1989	271	22.78	28.45	26.12	91.88	12.85	9
1989	272	6.58	29.59	25.95	89.39	11.56	9
1989	273	3.33	30.29	25.59	87.05	17.71	9
1989	274	0.4	29.78	25.34	89.04	16.6	9
1989	275	0.04	29.89	25.68	86.9	17.6	10
1989	276	1.56	31.2	25.27	83.71	18.5	10
1989	277	0.7	32.04	25.62	80.86	15.41	10
1989	278	8.93	31.88	25.9	79.84	15.95	10
1989	279	9.82	28.46	25.22	87.44	11.56	10
1989	280	6.15	29.94	24.67	85.7	16.24	10
1989	281	2.93	29.41	25.14	90.13	10.44	10
1989	282	4.2	28.97	25.73	90.63	15.01	10
1989	283	5.1	28.95	25.23	88.79	11.81	10
1989	284	28.11	29.57	25.2	86.14	15.26	10
1989	285	5.01	31	25.22	73.03	17.24	10
1989	286	0.45	31.1	24.2	74.72	17.21	10
1989	287	0	31.17	23.72	80.23	18.18	10
1989	288	0	31.46	23.57	81.27	19.04	10
1989	289	0	29.71	24.4	84.89	14.11	10
1989	290	26.45	27.92	24.12	90.73	8.1	10
1989	291	43.69	29.01	24.41	92.05	15.26	10
1989	292	0.53	30.68	20.78	72.8	18.4	10
1989	293	0.67	29.58	21.76	72.95	16.49	10
1989	294	0.21	29.93	22.52	79.99	17.03	10
1989	295	0.36	30.44	21.7	79.64	16.92	10
1989	296	3.73	28.27	23.34	87.72	11.95	10
1989	297	14.15	28.16	23.49	91.14	8.06	10
1989	298	6.57	29.49	24.46	87.38	10.8	10
1989	299	0.37	29.79	23.26	80.7	14.72	10
1989	300	1.58	30.09	22.78	78.2	16.34	10
1989	301	0.6	29.91	21.78	71.16	17.89	10
1989	302	0	29.76	18.34	63.97	18.07	10
1989	303	0	29.02	17.74	66.47	18.68	10
1989	304	0	29.1	18.02	67.98	18.07	10
1989	305	0	29.42	20.24	67.39	18.83	10
1989	306	0	29.2	19.15	70.69	18.29	11
1989	307	0	29.37	19.22	67.21	18.65	11
1989	308	0	28.8	18.41	65.9	17.78	11
1989	309	0	29.14	17.47	71.06	18.61	11
1989	310	0	29.89	19.23	65.75	17.71	11
1989	311	0	29.9	17.84	58.7	18.14	11
1989	312	0	27.81	15.65	63.66	17.24	11
1989	313	0	26.86	13.38	61.91	17.86	11
1989	314	0	26.08	13.83	70.62	18.4	11
1989	315	0	27.09	15.62	61.43	15.98	11
1989	316	0	26.64	15.62	61.68	15.95	11
1989	317	0	26.91	17.56	65.61	15.8	11
1989	318	0	27.99	17.16	62.18	16.27	11
1989	319	0	28.4	17.03	68.79	17.82	11
1989	320	0	29.01	18.66	77.6	16.92	11
1989	321	0	29.55	18.53	68.96	14.98	11
1989	322	0	29.25	16.58	57.19	15.55	11
1989	323	0	27.71	15.06	56.37	16.2	11
1989	324	0	28.02	19.89	66.3	14.22	11
1989	325	0	28.23	18.41	65.69	14.58	11
1989	326	0	28.03	16.41	56.07	16.42	11
1989	327	0	27.78	15.63	59.93	16.38	11
1989	328	0	27.66	15.43	58.96	16.96	11
1989	329	0	28.18	15.81	59.05	16.52	11
1989	330	0	28.38	15.42	59.14	16.38	11
1989	331	0	28.92	16.67	56.36	15.05	11
1989	332	0.38	28.98	16.78	63.44	14.29	11
1989	333	0.02	28.13	16.17	66.48	15.84	11
1989	334	0	28.21	16.53	62.45	15.84	11
1989	335	0	28.14	14.69	60.85	15.55	11
1989	336	0	27.52	12.87	57.83	15.66	12
1989	337	0	27.22	13.12	56.55	16.24	12
1989	338	0	26.75	11.17	51.28	16.63	12
1989	339	0	25.93	10.99	54.38	15.12	12
1989	340	0	25.49	9.69	48.67	15.66	12
1989	341	0	25.46	9.71	46.62	15.84	12
1989	342	0	26.77	10.16	44.82	16.13	12
1989	343	0	26.63	10.46	45.24	15.34	12
1989	344	0	26.79	12.09	49.53	15.3	12
1989	345	0	26.63	13.79	54.04	15.01	12
1989	346	0	26.72	13.3	45.4	14.87	12
1989	347	0	26.65	11.75	53.01	14.44	12
1989	348	0	26.79	12.74	57.14	15.55	12
1989	349	0	26.17	12.07	55.77	15.52	12
1989	350	0	27.19	12.47	51.92	15.7	12
1989	351	0	26.76	14.18	53.83	16.16	12
1989	352	0	27.37	13.27	50.89	15.66	12
1989	353	0	26.83	13.3	46.91	15.52	12
1989	354	0	26.98	14.06	45.63	14.62	12
1989	355	0	27.06	16.11	54.13	13.68	12
1989	356	0	27.45	16.22	66.49	14.58	12
1989	357	0	27.99	16.66	70.65	14.54	12
1989	358	0	26.87	16.98	68.7	13.46	12
1989	359	0	27.45	16.18	64.26	12.85	12
1989	360	0.74	27.56	17.44	65.52	4.9	12
1989	361	2.93	23.37	16.87	68.4	13.25	12
1989	362	0	25.37	12.2	52.93	15.52	12
1989	363	0	24.28	10.81	47.79	16.13	12
1989	364	0	23.94	9.83	45.98	15.73	12
1989	365	0	24.29	10.3	42.94	16.27	12
1990	1	0	25.33	11.18	48.16	15.44	1
1990	2	0	25.67	10.5	50.14	14.54	1
1990	3	0	25.15	9.77	45.34	16.13	1
1990	4	0	25.12	8.6	40.91	16.24	1
1990	5	0	26.04	8.25	38.51	16.2	1
1990	6	0	26.51	10.14	43.03	14.83	1
1990	7	0	26.9	10.28	42.99	15.7	1
1990	8	0	27.03	11.43	46.99	15.52	1
1990	9	0	26.44	10.96	45.26	15.26	1
1990	10	0	25.84	10.31	40.87	16.06	1
1990	11	0	25.74	9.95	39.45	15.05	1
1990	12	0	25.82	11.18	40.36	14.62	1
1990	13	0	25.93	10.54	46.21	14.72	1
1990	14	0	27.3	12	41.76	15.12	1
1990	15	0	28.19	14.22	42.88	16.42	1
1990	16	0	28.22	13.47	43.01	14.36	1
1990	17	0	27.65	10.24	38.98	16.63	1
1990	18	0	29.59	11.82	43.09	17.14	1
1990	19	0	30.04	12.78	43.28	16.99	1
1990	20	0	29.76	14.7	40.07	15.12	1
1990	21	0	29.6	14.42	47.74	15.3	1
1990	22	0	29.72	16.97	62.34	15.08	1
1990	23	0	30.44	16.95	68.52	14.8	1
1990	24	0	30.09	15.58	48.36	17.39	1
1990	25	0	30.09	13.44	34.51	16.06	1
1990	26	0	29.95	14.03	36.16	15.91	1
1990	27	0	30.65	16.07	54.43	16.85	1
1990	28	0	31.05	16.7	60.5	17.42	1
1990	29	0	32.11	17.89	64.81	18.9	1
1990	30	0	32.44	16.91	47.05	18.25	1
1990	31	0	32.42	17.1	49.05	19.22	1
1990	32	0	32.5	15.06	45.94	17.93	2
1990	33	0	32.32	19.47	56.95	15.98	2
1990	34	0	31.87	18.94	54.44	16.7	2
1990	35	0	30.5	15.23	40.6	18.18	2
1990	36	0	30.73	18.27	67.11	15.98	2
1990	37	0	31.49	17.74	49.67	16.56	2
1990	38	0	31.48	16.64	36.79	18.04	2
1990	39	0	31.45	17.45	46	18.32	2
1990	40	0	32.79	19.3	57.79	18.86	2
1990	41	0	30.79	19.45	53.93	17.32	2
1990	42	0.24	30.28	17.9	37.73	14.72	2
1990	43	0.02	31.64	17.28	41.52	17.75	2
1990	44	0	32.55	18.77	47.13	16.85	2
1990	45	3.4	30.39	20.87	65.8	6.08	2
1990	46	4.66	29.35	19.69	64.36	15.26	2
1990	47	0.16	30.91	19.85	61.03	18.36	2
1990	48	3.01	30.17	20.05	60.74	17.68	2
1990	49	5.13	29.05	20.13	70.95	15.16	2
1990	50	9.34	29.03	18.98	66.29	12.92	2
1990	51	3.36	29.72	19.79	68.79	14.33	2
1990	52	5.99	29.32	20.6	69.04	16.31	2
1990	53	11.13	27.4	19.22	66.05	19.62	2
1990	54	0.25	29.64	17.23	56.27	18.94	2
1990	55	0.04	29.6	19.89	60.41	17.68	2
1990	56	5.44	30.18	19.41	67.47	15.52	2
1990	57	7.98	30.1	21.11	70.37	16.2	2
1990	58	0.5	32.33	21.89	61.92	19.15	2
1990	59	0.01	32.63	21.34	64.83	18.29	2
1990	60	1.07	31.72	22.35	73.35	11.05	2
1990	61	1.26	32.56	22.38	64.43	15.16	3
1990	62	6.8	23.07	18.63	76.13	10.66	3
1990	63	9.05	28.73	18	57.09	17.32	3
1990	64	0	31.16	15.69	47.54	20.66	3
1990	65	7.77	29.9	19.8	66.89	6.59	3
1990	66	0.6	30.9	18.46	52.69	19.62	3
1990	67	1.44	31.35	18.72	47.92	20.77	3
1990	68	0	31.35	19.29	60.24	17.53	3
1990	69	0	31.01	20.83	70.88	17.57	3
1990	70	0.18	31.36	20.76	71.64	11.56	3
1990	71	0.16	30.68	20.79	64.13	16.6	3
1990	72	6.31	31.27	20.56	60.59	17.75	3
1990	73	1.39	31.76	20.45	58.27	18.68	3
1990	74	0.14	31.76	20.75	58.83	20.3	3
1990	75	0	32.86	20.77	57.4	20.34	3
1990	76	0	33.7	20.14	56.3	23.65	3
1990	77	0	34.62	20.13	55.83	23.72	3
1990	78	0	34.65	21.1	59.76	21.89	3
1990	79	0	35.92	22.78	60.24	23.36	3
1990	80	1.51	35.95	23.46	64.6	23	3
1990	81	0.18	36.79	23.34	63.24	21.2	3
1990	82	0.02	37.43	23.34	61.42	18.5	3
1990	83	1.11	31.92	25.53	73.7	14.36	3
1990	84	16.82	31.52	24.14	76.17	15.98	3
1990	85	0.75	32.42	22.76	63.65	16.49	3
1990	86	0.02	29.43	22.36	73.54	10.01	3
1990	87	3.84	31.18	21.6	70.33	9.79	3
1990	88	15.16	30.23	22.43	79.62	14.33	3
1990	89	18.3	31.82	23.6	76.55	23.4	3
1990	90	0.45	33.83	22.85	70.41	22.61	3
1990	91	2.32	34.47	24.08	69.77	19.33	3
1990	92	1.4	35.04	23.55	56.39	22.57	4
1990	93	2.29	31.93	23.09	70.11	15.37	4
1990	94	13.33	29.81	19.04	77.87	14.9	4
1990	95	4.54	31.28	18.32	62.25	24.55	4
1990	96	0.62	31.27	21.69	70.03	18.25	4
1990	97	0.11	31.21	22.71	75.77	22.93	4
1990	98	3.64	33.05	23.55	74.23	20.7	4
1990	99	1.3	35.97	24.19	64.16	22.79	4
1990	100	0.04	36.84	22.31	56.96	24.01	4
1990	101	0	36.87	23.2	57.88	23.65	4
1990	102	0	38.22	24.89	62.9	21.96	4
1990	103	0	36.63	25.22	68.94	21.96	4
1990	104	0	38.65	25.83	64.67	21.64	4
1990	105	0	37.68	25.75	61	23.04	4
1990	106	0	36.45	25.72	67.08	21.64	4
1990	107	0	36.04	25.56	67.09	21.1	4
1990	108	0	37.17	25.25	65.12	24.12	4
1990	109	0	36.28	24.97	67.84	21.67	4
1990	110	0.01	37.74	25.98	67.13	21.13	4
1990	111	0	38.71	26.03	63.59	21.28	4
1990	112	0	37.08	25.76	69.46	22	4
1990	113	0	38.18	26.25	65.94	23	4
1990	114	0	38.65	26.21	63.77	21.06	4
1990	115	0	37.18	26.02	66.05	21.74	4
1990	116	0	36.92	25.32	64.95	21.92	4
1990	117	0.02	36.34	25.63	65.24	21.35	4
1990	118	0	37.75	25.74	62.74	20.05	4
1990	119	1.42	37.68	25.87	60.24	13.46	4
1990	120	1.75	36	25.53	63.78	24.84	4
1990	121	0.21	37.36	25.96	57.15	23.8	4
1990	122	0.04	37.73	25.5	57.48	24.05	5
1990	123	0.02	39.59	26.66	54.66	20.99	5
1990	124	0.62	37.81	27.08	56.04	13.75	5
1990	125	8.29	36.25	26.26	58.12	24.16	5
1990	126	2.26	36.34	26.19	60.24	21.2	5
1990	127	0.02	36.55	26.17	59.82	22.86	5
1990	128	0.01	32.42	27.14	69.81	18.36	5
1990	129	0	31.95	26.94	69.49	13.9	5
1990	130	0.02	33.61	26.68	67.62	19.8	5
1990	131	4.53	32.37	26.92	69.11	18.14	5
1990	132	10.84	33.74	26.04	71.79	13.97	5
1990	133	5.77	32.27	26.17	75.03	15.41	5
1990	134	37.64	29.11	26.57	86.39	6.7	5
1990	135	65.03	31.54	25.82	80.84	16.74	5
1990	136	0.4	35.91	24.86	67.25	26.1	5
1990	137	0.03	36.06	26.55	71.64	21.13	5
1990	138	0.01	34.15	27.45	76.88	17.86	5
1990	139	4.7	33.84	26.88	78.88	13.32	5
1990	140	5.88	33.71	27.08	77.58	21.85	5
1990	141	5.69	31.5	26.96	81.97	21.13	5
1990	142	4.19	34.19	26.8	78.5	20.16	5
1990	143	3.31	36.06	26.92	71.25	18.5	5
1990	144	19.97	34.23	27.14	76.19	22.03	5
1990	145	0.02	34.34	26.76	73.74	20.66	5
1990	146	1.21	33.51	26.42	77.19	19.44	5
1990	147	0.76	34.62	26.63	78.71	20.45	5
1990	148	0.85	36.45	27.42	74.27	22.14	5
1990	149	0.59	36.02	28.03	73.9	15.88	5
1990	150	0.26	35.84	27.25	73.37	23.26	5
1990	151	0.09	33.14	28.05	79.26	22.36	5
1990	152	0.36	33.52	27.58	79.43	15.19	5
1990	153	0.61	33.83	27.25	78.32	16.49	6
1990	154	7.92	31.91	27.99	82.21	21.06	6
1990	155	3.6	31.75	27.42	77.01	18.47	6
1990	156	0.07	34.29	27.95	72.02	18.86	6
1990	157	20.48	31.67	27.75	79.96	19.55	6
1990	158	9.94	32.42	27.35	82.86	22.21	6
1990	159	0.06	31.89	27.71	83.56	19.33	6
1990	160	0.12	31.82	27.41	81.48	22	6
1990	161	0.16	32.1	27.04	80.9	22.5	6
1990	162	0.11	33.09	26.89	77.51	20.34	6
1990	163	0.01	32.36	26.74	76.5	19.87	6
1990	164	2.32	32	26.34	77.87	14.08	6
1990	165	12.97	31.4	26.29	84.04	7.02	6
1990	166	25.46	32.03	27.38	83.16	18.94	6
1990	167	14.47	31.84	26.99	83.95	22.5	6
1990	168	8.07	32.39	27.11	81.97	16.2	6
1990	169	3.64	31.13	27.5	84.72	16.74	6
1990	170	6.56	32.62	27.02	82.53	16.56	6
1990	171	8.71	32.48	27.66	84.66	14.15	6
1990	172	4.26	31.9	27.45	85.04	10.58	6
1990	173	1.64	30.95	27.54	88.64	17.35	6
1990	174	0.92	32.15	27.58	85.95	12.71	6
1990	175	12.9	31.02	27.19	86.43	10.3	6
1990	176	16.22	33.36	26.71	79.4	17.82	6
1990	177	22.33	30.03	26.93	88.49	12.02	6
1990	178	23.55	29.75	26.7	89.88	10.8	6
1990	179	28.72	31.44	26.74	84.98	17.06	6
1990	180	1.57	32.61	27.53	83.92	20.84	6
1990	181	0.09	32	27.46	86.09	14.65	6
1990	182	29.66	30.42	27.2	89.03	11.41	6
1990	183	30.48	30.55	26.81	88.3	11.3	7
1990	184	26.15	29.68	26.56	88.64	9.14	7
1990	185	30.42	30.22	26.8	88.79	12.42	7
1990	186	24.53	29.36	26.5	90.29	13.14	7
1990	187	25.99	31.53	26.37	87.28	11.95	7
1990	188	26.33	29.43	26.59	89.38	15.37	7
1990	189	11.15	29.07	26.44	90.28	11.81	7
1990	190	16.26	29.55	25.94	88.46	7.78	7
1990	191	33.77	29.28	26.55	91.59	16.56	7
1990	192	8.41	30.51	26.16	88.13	16.78	7
1990	193	35.97	29.07	26.2	91.19	9.18	7
1990	194	24.17	30.37	26.5	88.93	16.81	7
1990	195	12.72	30.04	26.15	87.2	16.38	7
1990	196	14.78	30.12	26.65	88.97	14.11	7
1990	197	2.88	30.33	26.1	87.73	15.48	7
1990	198	4.08	31.24	25.99	84.99	17.42	7
1990	199	9.31	31.04	26.87	87.18	16.99	7
1990	200	6.77	29.83	26.59	90.27	14.51	7
1990	201	29.73	31.18	26.67	87.71	7.63	7
1990	202	25.89	29.82	26.6	89.94	15.19	7
1990	203	3.76	30.79	26.92	90.82	18.68	7
1990	204	2.17	30.72	26.51	89.15	18.54	7
1990	205	7.01	30.29	26.08	89.24	17.24	7
1990	206	2.61	31.26	26.18	86.77	18.79	7
1990	207	0.13	31.34	26.37	85.91	12.92	7
1990	208	1.26	30.58	26.72	88.4	10.04	7
1990	209	34.96	28.88	26.74	92.68	9.86	7
1990	210	17.77	30.3	26.39	87.78	13.82	7
1990	211	13.48	31.2	26.23	86.7	17.35	7
1990	212	11.4	30.77	26.66	89.77	16.99	7
1990	213	19.07	29.86	26.8	92.21	9	7
1990	214	35.32	28.85	26.59	92.71	11.95	8
1990	215	9.24	29.26	26.02	89.53	12.53	8
1990	216	27.12	30.74	25.36	86.13	19.04	8
1990	217	14.37	30	25.98	89.95	18.43	8
1990	218	0.31	29.44	26.25	90.31	11.2	8
1990	219	5.98	29.39	25.81	89.06	16.85	8
1990	220	5.54	30.78	25.64	87.63	19.94	8
1990	221	1.2	31.15	26.09	87.97	18.36	8
1990	222	0.97	31.1	26.09	87.45	20.7	8
1990	223	0.24	30.11	26.22	88.68	20.52	8
1990	224	0.63	30.72	26.2	87.63	18.14	8
1990	225	1.23	31.69	26.25	85.82	17.53	8
1990	226	7.96	30.71	26.72	89.27	13.68	8
1990	227	13.02	29.92	26.3	89.45	14.51	8
1990	228	10.51	29.34	26.72	92.14	13.46	8
1990	229	10.73	31.2	26.43	88.29	15.55	8
1990	230	7.3	31.44	26.24	86.56	16.2	8
1990	231	1.06	31.85	25.96	85.58	18.47	8
1990	232	0.91	32.06	25.78	87.84	17.64	8
1990	233	4.14	30.92	26.6	87.29	16.2	8
1990	234	8.14	30.88	26.31	86.41	17.5	8
1990	235	2.39	31	26.2	86.73	20.41	8
1990	236	1.07	31.41	26.68	87.22	16.38	8
1990	237	3.41	31.37	27.09	87.97	14.72	8
1990	238	3.99	29.75	26.92	89.77	9.29	8
1990	239	10.48	31.78	25.56	86.68	18.76	8
1990	240	4.7	31.31	25.93	87.79	17.39	8
1990	241	5.63	31.05	26.31	87.55	18.9	8
1990	242	5.27	31.23	25.77	85.77	17.6	8
1990	243	1.48	31.95	25.76	84.42	21.28	8
1990	244	0.39	30.95	25.44	86.46	15.16	8
1990	245	41.53	30.95	25.92	87.51	3.17	9
1990	246	26.23	29.91	26.22	91.11	8.53	9
1990	247	13.02	30.21	26.18	88.74	15.34	9
1990	248	4.7	30.43	26.2	88.23	12.64	9
1990	249	6.97	29.96	25.95	87.49	14.15	9
1990	250	3.76	30.53	25.83	88.12	16.85	9
1990	251	0.6	30.21	26.36	88.72	18.25	9
1990	252	0.09	31.31	26.4	87.91	14.54	9
1990	253	8.34	29.18	26.85	93.03	9.43	9
1990	254	33.76	30.36	26.07	89.92	16.13	9
1990	255	5.74	30.7	25.69	86.79	15.77	9
1990	256	12.77	30.7	26.05	88.62	14.11	9
1990	257	20.14	30.58	26.18	88.53	9.86	9
1990	258	7.16	30.26	26.09	88.47	15.19	9
1990	259	4.06	29.87	26.31	90.71	14.04	9
1990	260	26.6	29.22	26.48	92.38	10.94	9
1990	261	27.38	29.96	25.98	87.62	8.35	9
1990	262	11.46	30.14	25.69	86.53	9.72	9
1990	263	9.03	29.33	25.41	91.7	9.36	9
1990	264	6.53	29.93	25.93	90.4	9.9	9
1990	265	2.5	30.12	25.64	87.89	15.48	9
1990	266	0.15	30.69	25.52	87.86	18.29	9
1990	267	0.06	28.98	26.17	90.08	15.7	9
1990	268	5.94	29.88	26.03	88.6	9.76	9
1990	269	14.99	29.76	25.83	88.83	17.1	9
1990	270	3.05	30.06	25.83	88.42	19.76	9
1990	271	0.79	29.36	25.88	89.21	16.85	9
1990	272	0.86	29.11	25.3	88.96	13.54	9
1990	273	17.77	28.39	24.98	91.84	14.26	9
1990	274	14.38	28.3	25.39	93.06	9	9
1990	275	4.61	28.64	25.78	91.57	12.35	10
1990	276	8.84	28.65	25.93	91.78	4.14	10
1990	277	9	28.75	25.77	92.75	5.58	10
1990	278	22.46	29.43	25.97	92.03	11.77	10
1990	279	9.41	29.01	25.72	91.47	21.78	10
1990	280	12.58	28.39	25.39	92.96	12.46	10
1990	281	3.5	28.82	25.47	92.75	7.81	10
1990	282	8.88	29.54	25.12	90.04	5.62	10
1990	283	0.5	27.96	22.69	84.43	13.75	10
1990	284	0.22	27.74	23.37	86.35	16.27	10
1990	285	5.16	29.83	23.67	84.44	15.05	10
1990	286	2.7	30.5	23.75	80.27	14.94	10
1990	287	0.84	29.9	23.77	80.9	17.32	10
1990	288	1.43	29.3	23.23	81.7	12.92	10
1990	289	0.83	29.28	23.34	82.85	17.82	10
1990	290	0.04	29.41	20.67	69.37	19.22	10
1990	291	0	29.23	20.18	68.63	19.84	10
1990	292	0	29.76	20.75	72.62	19.48	10
1990	293	0	29.92	20.87	76.52	18.68	10
1990	294	0	30.11	21.06	74.39	17.78	10
1990	295	0	29.34	20.76	76.49	17.89	10
1990	296	0	29.56	21.18	74.85	11.99	10
1990	297	0.11	28.16	20.2	70.91	11.34	10
1990	298	0	28.78	19.79	70.17	15.19	10
1990	299	0.01	26.81	18.67	72.91	13.18	10
1990	300	0	27.74	19.55	71	10.55	10
1990	301	0	28.28	19.77	67.2	16.02	10
1990	302	0	29.21	20.35	72.33	15.88	10
1990	303	0	28.54	19.53	70.04	18.36	10
1990	304	0	28.2	16.92	65.06	16.96	10
1990	305	0	28.04	18.31	68.29	19.22	10
1990	306	0	29.17	17.44	78.21	12.1	11
1990	307	3.47	27.92	22.32	88.18	6.08	11
1990	308	14.41	26.87	23.31	93.9	5.94	11
1990	309	7.43	29.94	23.98	84.51	8.82	11
1990	310	3.15	28.09	23.79	91.79	5.65	11
1990	311	0.21	28.71	24.7	90.48	12.92	11
1990	312	0.52	29	21.11	81.6	14.29	11
1990	313	0.01	28.57	16.47	76.76	17.57	11
1990	314	0	27.4	17.26	82.91	17.06	11
1990	315	0	28.52	20.51	86.87	13.54	11
1990	316	0	29.1	22.63	84.12	10.33	11
1990	317	0.02	30.32	22.68	79.64	15.91	11
1990	318	0	30.84	20.1	77.92	18.11	11
1990	319	0	30.15	18.86	76.52	18.04	11
1990	320	0	28.61	18.89	75.25	16.56	11
1990	321	0	28.54	18.67	68.81	16.31	11
1990	322	0	27.71	16.73	67.57	16.27	11
1990	323	0	27.95	15.49	70.86	16.09	11
1990	324	0	29.07	16.14	68.48	16.24	11
1990	325	0	29.24	16.46	71.35	15.34	11
1990	326	0	28.74	15.92	71.84	13.9	11
1990	327	0	28.24	16.98	73.47	13.21	11
1990	328	0	28.59	17.23	71.49	16.38	11
1990	329	0	28.6	17.08	73.87	15.84	11
1990	330	0	27.93	15.53	68.66	15.84	11
1990	331	0	26.7	14.36	63.35	14.47	11
1990	332	0	25.49	15.24	63.97	15.08	11
1990	333	0	26.54	12.9	60.76	14.69	11
1990	334	0	26.65	14.29	59.72	15.41	11
1990	335	0	26.55	15.39	68.14	15.16	11
1990	336	0	27.04	17.75	68.83	13.9	12
1990	337	0	27.7	17.08	65.89	14.08	12
1990	338	0	27.37	16.34	63.21	15.3	12
1990	339	0	24.74	15.93	68.2	14.98	12
1990	340	0	26.95	16.61	72.37	14.94	12
1990	341	0	27.54	14.7	68.84	16.24	12
1990	342	0	27.19	15.76	67.11	16.34	12
1990	343	0	25.67	13.95	59.74	15.37	12
1990	344	0	26.25	13.11	58.08	15.01	12
1990	345	0	26.92	13.81	62.7	15.84	12
1990	346	0	26.57	13.25	67.91	15.19	12
1990	347	0	25.85	12.01	67.14	15.73	12
1990	348	0	25.64	11.95	63.28	13.28	12
1990	349	0	27.16	13.24	61.59	11.66	12
1990	350	0	26.41	13.74	58.91	13.18	12
1990	351	0.02	26.63	17.9	69.55	5.62	12
1990	352	0.85	26.63	18.14	75.61	9.83	12
1990	353	0.28	27.11	15.34	69.61	16.27	12
1990	354	0	27.06	13.46	62.1	15.55	12
1990	355	0	25.24	10.77	55.46	15.88	12
1990	356	0	24.63	10.27	51.38	15.84	12
1990	357	0	25.09	9.65	53.89	15.8	12
1990	358	0	24.88	9.52	54.33	15.88	12
1990	359	0	24.47	9.52	53.88	15.88	12
1990	360	0	24.78	9.72	53.23	15.59	12
1990	361	0	25.62	10.41	55.83	14.83	12
1990	362	0	25.43	10.67	56.49	15.34	12
1990	363	0	26.51	14.12	53.29	15.34	12
1990	364	0	26.41	14.13	57.84	14.69	12
1990	365	0	26.54	13.36	61.78	15.34	12
1991	1	0	26.16	15.97	74.88	11.99	1
1991	2	0	26.68	19.19	79.41	8.35	1
1991	3	1.83	24.64	13.73	73.34	11.45	1
1991	4	0	22.91	8.58	51.51	16.42	1
1991	5	0	23.71	8.86	51.58	15.7	1
1991	6	0	24.04	8.92	48.14	16.52	1
1991	7	0	25.89	9.35	45.64	15.73	1
1991	8	0	26.78	10.72	49.82	15.48	1
1991	9	0	26.54	13.25	65.37	15.05	1
1991	10	1.92	23.46	16.31	76.68	5.15	1
1991	11	0.08	27.03	16.19	68.98	12.42	1
1991	12	0	27.34	14.94	67.08	6.16	1
1991	13	0.35	25.11	16.47	74.47	10.19	1
1991	14	0.05	26.38	13.87	59.43	11.7	1
1991	15	0.08	26.22	13.8	52.17	14.29	1
1991	16	0	26.16	11.35	47.82	14.69	1
1991	17	0	25.8	11.4	48.43	14.11	1
1991	18	0	26.1	12.19	48.39	16.13	1
1991	19	0	25.72	12.38	57.65	11.38	1
1991	20	0	25.67	11.07	47.04	16.56	1
1991	21	0	25.55	9.89	42.87	17.53	1
1991	22	0	27.02	12.53	44.27	16.67	1
1991	23	0	27.38	14.4	52.87	15.88	1
1991	24	0	27.52	13.15	49.65	17.24	1
1991	25	0	26.45	10.62	41.94	17.39	1
1991	26	0	27.08	11.12	42.49	17.06	1
1991	27	0	27.9	11.18	44.93	17.46	1
1991	28	0	28.88	12.34	45.91	18.07	1
1991	29	0	28.84	12.96	48.07	18.25	1
1991	30	0	30.52	15.56	56.67	17.78	1
1991	31	0	30.08	16.16	54.84	17.64	1
1991	32	0	30.57	17.68	70.76	16.02	2
1991	33	0	30.95	17.49	69.12	17.03	2
1991	34	0	31.76	18.14	63.8	7.7	2
1991	35	1.19	30.73	19.19	55.8	14.58	2
1991	36	0	29.06	13.66	34.33	16.31	2
1991	37	0	29.81	14.31	33.75	17.78	2
1991	38	0	30.89	14.17	42.38	18.36	2
1991	39	0	32.24	15.52	51.53	17.82	2
1991	40	0	32.43	16.84	51.69	18.83	2
1991	41	0	32.42	16.32	46.52	19.12	2
1991	42	0	33.04	15.94	42.77	18.61	2
1991	43	0	34.07	19.39	62.26	17.5	2
1991	44	0	34.19	20.83	53.51	18.65	2
1991	45	0	32.7	16.16	30.5	20.12	2
1991	46	0	32.39	16.43	36.87	20.34	2
1991	47	0	31.75	14.43	32.93	20.45	2
1991	48	0	32.25	15.44	39.27	20.56	2
1991	49	0	33.78	16.78	42.54	17.35	2
1991	50	0	33.84	19.69	37.42	20.52	2
1991	51	0	34.12	19.08	39.89	19.8	2
1991	52	0	34.12	17.81	35.08	20.92	2
1991	53	0	34.58	17.64	43.05	20.88	2
1991	54	0	35.84	20.78	50.04	20.7	2
1991	55	0	35.8	18.84	35.77	20.3	2
1991	56	0	36.29	21.32	50.87	20.16	2
1991	57	0	36.37	21.92	53.81	20.34	2
1991	58	0	35.23	20.45	45.99	19.94	2
1991	59	0	34.88	21.49	52.78	18.72	2
1991	60	0.02	31.03	23.32	59.74	9.54	2
1991	61	0.01	34.88	22.7	47.27	18.04	3
1991	62	0	34.74	21.57	45.75	19.8	3
1991	63	0.01	35.9	21.77	51.46	19.94	3
1991	64	0	35.51	23.09	54.39	13.9	3
1991	65	0	35.17	24.14	51.99	19.76	3
1991	66	0	35.47	21.64	47.15	19.76	3
1991	67	0.22	34.94	21.9	53.14	17.93	3
1991	68	0	35.65	21.93	53.9	16.13	3
1991	69	0	36.74	23.31	55.32	21.56	3
1991	70	0.03	37.71	23.39	55.01	22.25	3
1991	71	0.51	37.67	24.41	54.92	19.66	3
1991	72	0	37.85	24.26	52.33	22.07	3
1991	73	0	37.81	24.59	50.33	20.45	3
1991	74	0.01	38.28	24.64	48.99	10.44	3
1991	75	2.81	37.83	24.15	49.74	22.64	3
1991	76	0.01	38.71	24.15	49.47	21.2	3
1991	77	0	39.39	23.97	46.97	22.79	3
1991	78	0	39.45	24.52	45.46	23.15	3
1991	79	0	39.73	24.49	48.73	23.29	3
1991	80	0	39.16	24.87	53.2	22.14	3
1991	81	0	39.26	25.22	45.34	18.4	3
1991	82	0.07	37.71	22.96	32.45	13.14	3
1991	83	0.1	37.71	24.35	50.63	19.12	3
1991	84	0.02	37.21	23.69	46.76	25.16	3
1991	85	0	37.34	23.57	53.26	21.96	3
1991	86	0	37.58	24.89	54.25	21.92	3
1991	87	0.02	38.34	24.29	50.35	22.46	3
1991	88	0.02	38.31	25.08	54.21	21.56	3
1991	89	0	40.13	25.33	49.44	23.51	3
1991	90	0	40.17	25.77	50.56	23.47	3
1991	91	0	38.44	26.53	57.17	12.2	3
1991	92	0.02	39.98	26.67	56.8	19.51	4
1991	93	0	40.21	26.27	56.38	19.22	4
1991	94	0	39.18	26.4	58.79	19.08	4
1991	95	0	38.71	27.35	50.9	22.18	4
1991	96	0.09	35.8	27.57	44.8	18.97	4
1991	97	0	36.11	26.54	46.87	16.56	4
1991	98	0	38.7	25.21	49.78	23.15	4
1991	99	0	39.49	26.35	50.15	18.47	4
1991	100	0	38.63	25.75	50.12	19.69	4
1991	101	0	38.04	25.18	48.31	22.97	4
1991	102	0	38.03	26.12	50.1	25.2	4
1991	103	0	38.86	26.38	48.24	22.79	4
1991	104	0.27	38.94	26.09	47.39	22.79	4
1991	105	0.15	40.58	27.01	51.05	22.64	4
1991	106	0.06	42.41	27.65	41.83	24.66	4
1991	107	1.02	41.87	25.43	40.79	25.13	4
1991	108	0	41.4	25.26	34.69	25.31	4
1991	109	0	40.6	23.97	41.78	25.42	4
1991	110	0	40.26	25.8	48.46	26.53	4
1991	111	0	39.59	25.28	53.73	25.88	4
1991	112	0	39.77	26.03	56.44	25.6	4
1991	113	0	38.57	26.76	60.2	24.44	4
1991	114	0	38.01	27.14	59.27	22.46	4
1991	115	0	39.73	26.79	53.88	22.82	4
1991	116	0	38.94	25.85	50.39	23.08	4
1991	117	0	37.19	27.44	58.07	23.33	4
1991	118	0	34.24	26.77	63.67	14.94	4
1991	119	0.13	35.37	26.26	52.36	8.03	4
1991	120	0.27	39.92	26.89	47.35	24.34	4
1991	121	0.23	42.74	27.11	54.5	21.6	4
1991	122	0.01	39.29	27.48	62.56	17.14	5
1991	123	0.05	37.73	28.15	67.94	21.42	5
1991	124	0.07	38.99	27.78	63.2	22.1	5
1991	125	0.08	37.97	27.89	65.78	14.83	5
1991	126	0	41.03	27.47	59.4	23.11	5
1991	127	0	41.34	27.93	57.98	25.34	5
1991	128	0	39.92	27.93	64.12	23.18	5
1991	129	0.06	38.19	27.92	68.1	20.74	5
1991	130	0.12	36.14	27.77	71.71	22.28	5
1991	131	0.08	35.57	27.51	72.47	23.83	5
1991	132	0	36.34	27.04	68.13	21.96	5
1991	133	0	38.54	27.04	63.87	23.98	5
1991	134	0.05	40.46	26.84	57.59	25.16	5
1991	135	0.05	38.05	26.84	62.18	22.79	5
1991	136	0	38.02	27.22	62.97	18.76	5
1991	137	0	38.36	27.11	63.8	18.76	5
1991	138	0	39.85	27.24	60.2	22.39	5
1991	139	0.02	37.62	27.2	62.83	18.11	5
1991	140	0.42	36.18	26.81	64.54	15.84	5
1991	141	1.67	36.69	26.67	63.73	24.01	5
1991	142	0.95	37.5	27	63.38	12.17	5
1991	143	0.87	39.56	27.41	61.13	23.4	5
1991	144	0.67	39.27	27.53	64.09	23.54	5
1991	145	0.01	37.64	27.88	66.84	22.21	5
1991	146	0.03	36.42	28.04	65.81	19.12	5
1991	147	0.03	38.52	27.7	64.23	19.98	5
1991	148	0.01	37.45	27.75	62.29	20.12	5
1991	149	0.01	36.25	28.55	64.36	20.81	5
1991	150	0.1	37.48	28.36	59.5	23.22	5
1991	151	0.1	37.25	28.42	60.1	24.12	5
1991	152	0.97	36.16	27.43	62.53	16.78	5
1991	153	1.37	39.22	25.75	53.92	19.55	6
1991	154	0.27	37.56	28.4	61.02	20.52	6
1991	155	1.62	33.27	28.69	70.81	17.28	6
1991	156	3.81	31.55	27.69	76.31	12.82	6
1991	157	20.11	29.92	27.41	87.4	5.33	6
1991	158	56.85	30.08	26.78	89.77	6.01	6
1991	159	22.63	31.15	27.26	87.59	19.12	6
1991	160	37.11	30.8	27.34	89.78	19.15	6
1991	161	29.87	29.86	27.04	91.23	7.52	6
1991	162	18.97	30.48	26.78	87.56	12.49	6
1991	163	7.54	30.87	26.51	86.6	8.96	6
1991	164	12.46	31.06	27.27	84.19	12.64	6
1991	165	11.64	31.38	27.19	84.57	16.92	6
1991	166	4.98	31.71	27.63	85.54	16.63	6
1991	167	51.08	32.2	27.68	87.35	19.51	6
1991	168	5.47	33.61	27.25	83.33	20.38	6
1991	169	1.59	34.36	27.63	81.37	20.41	6
1991	170	3.37	31.05	27.05	84.07	20.95	6
1991	171	20.38	32.28	26.43	84.43	23.11	6
1991	172	10.2	32.5	26.46	84.66	19.69	6
1991	173	0	33.24	27.12	82.07	21.2	6
1991	174	0	30.33	27.67	87.35	15.52	6
1991	175	0.02	32.08	27.3	83.44	22.64	6
1991	176	0.01	34.15	27.37	81.58	17.64	6
1991	177	0	32.4	27.45	84.46	14.11	6
1991	178	0.4	33.88	26.92	79.11	21.2	6
1991	179	3.66	28.61	26.55	87.41	16.49	6
1991	180	15.11	29.73	26.18	87.68	14.15	6
1991	181	11.61	30.33	26.24	84.68	13.9	6
1991	182	4.41	32.23	26.48	83.68	14.62	6
1991	183	0.13	31.26	26.91	85.25	20.12	7
1991	184	51.53	29.89	26.71	90.38	3.02	7
1991	185	62.09	29.28	26.58	92.02	6.77	7
1991	186	16.85	30.57	26.39	88.01	15.55	7
1991	187	7.04	30.37	26.54	89.68	20.41	7
1991	188	1.98	30.31	26.93	90.53	20.27	7
1991	189	0.2	30.9	27.01	88.48	21.42	7
1991	190	1.16	31.66	26.95	86.21	15.16	7
1991	191	3.53	30.3	27.11	88.79	14.4	7
1991	192	0.66	31.38	26.67	85.72	19.48	7
1991	193	1	31.21	26.53	85.35	20.05	7
1991	194	1.74	31.49	26.6	85.64	20.12	7
1991	195	20.89	31.91	26.63	86.27	21.17	7
1991	196	9.01	31.92	26.88	86.33	18.29	7
1991	197	1.12	29.93	26.86	89.73	10.91	7
1991	198	9.86	29.95	26.87	88.18	11.48	7
1991	199	10.85	30.59	26.7	87.45	6.95	7
1991	200	4.7	29.9	26.97	90.65	9.04	7
1991	201	9.44	30.32	26.67	88.84	14.54	7
1991	202	55.39	30.59	26.22	89.8	8.64	7
1991	203	20.85	29.39	26.18	88.65	6.01	7
1991	204	11.14	30.19	26.78	88.32	16.27	7
1991	205	2.6	30.59	26.57	87.84	14.65	7
1991	206	0.9	30.5	26	88.02	18.83	7
1991	207	0.51	32.75	26.2	82.83	18.07	7
1991	208	5.88	33.14	27.02	85.02	18.9	7
1991	209	5.03	31.77	26.96	87.32	15.05	7
1991	210	11.9	30.63	27.03	87.36	13.07	7
1991	211	8.61	31.12	26.73	84.98	18.04	7
1991	212	1.79	31.26	26.62	86.79	18.9	7
1991	213	0.04	31.42	26.99	87.57	15.48	7
1991	214	0.36	30.41	27.12	89.91	14.18	8
1991	215	4	30	26.5	89.71	2.09	8
1991	216	7.72	29.89	26.51	89.43	17.46	8
1991	217	3.97	29.73	26.65	89.76	10.19	8
1991	218	3.12	30.94	26.39	87.32	17.68	8
1991	219	18.83	30.48	26.42	88.51	15.66	8
1991	220	2.05	31.81	26.03	84.6	19.76	8
1991	221	2.41	31.4	26.6	85.91	14.72	8
1991	222	11	31.17	27.12	87.43	16.56	8
1991	223	6.73	30.97	27.22	87.8	16.13	8
1991	224	7.95	31.69	27.04	89.16	12.1	8
1991	225	11.47	30.72	27.14	85.84	16.42	8
1991	226	5.43	30.77	26.94	84.34	17.6	8
1991	227	0.33	29.81	26.87	88.21	13.03	8
1991	228	3.27	31.31	26.58	87.22	10.3	8
1991	229	6.43	30.97	26.28	85.46	13.43	8
1991	230	5.66	31.01	26.26	87.06	15.59	8
1991	231	5.11	31.86	26.28	86.12	18.25	8
1991	232	1.36	32.84	26.77	82.14	19.98	8
1991	233	11.24	33.02	27	85.44	10.01	8
1991	234	12.8	30.09	27.04	91.04	10.62	8
1991	235	21.5	30.87	26.96	87.41	14.15	8
1991	236	18.26	31.2	26.69	88.46	16.49	8
1991	237	0.83	30.21	26.78	89.82	11.88	8
1991	238	1	30.21	26.67	89.19	7.42	8
1991	239	22.22	30.44	26.22	89.81	13.57	8
1991	240	17.99	30.09	26.55	89.41	12.06	8
1991	241	6.52	29.95	26.04	88.79	15.59	8
1991	242	2.63	30.77	25.56	85.88	17.03	8
1991	243	1.05	30.65	25.64	87.04	13.64	8
1991	244	0.92	30.67	25.96	87.04	15.12	8
1991	245	2.64	30.39	26.34	88.38	10.33	9
1991	246	8.99	30.13	26.94	89.86	10.55	9
1991	247	16.43	29.19	26.76	93.01	8.53	9
1991	248	10.56	29.72	26.74	90.4	4.25	9
1991	249	13.17	29.27	26.56	91.02	20.56	9
1991	250	15.79	30.12	26.51	88.88	15.62	9
1991	251	7.76	30.48	26.24	87.89	20.34	9
1991	252	38.07	29.63	26.23	88.6	4.25	9
1991	253	20.21	29.78	25.85	90.16	7.42	9
1991	254	4.87	29.79	26.07	88.43	16.99	9
1991	255	0.41	31.69	26.15	83.37	17.71	9
1991	256	6.26	29.75	26.33	90.04	11.02	9
1991	257	3.79	29	25.9	88.94	5.11	9
1991	258	0.88	30.3	25.54	86.92	11.41	9
1991	259	1.74	29.72	25.99	88.66	16.31	9
1991	260	3.87	29.93	25.95	86.61	17.39	9
1991	261	2.33	30.82	25.94	85.09	19.01	9
1991	262	1.12	31.66	25.94	83.47	16.6	9
1991	263	2.54	30.88	26.6	84.32	17.39	9
1991	264	0.95	29.77	26.15	89.61	16.24	9
1991	265	0.94	29.21	25.84	91.75	14.54	9
1991	266	11.17	28.48	26.23	91	9.79	9
1991	267	7.63	29.87	26.27	89.84	11.27	9
1991	268	5.29	30.14	26.82	88.71	7.13	9
1991	269	13.25	29.66	25.62	82.67	4.43	9
1991	270	6.85	30.23	24.07	81.63	15.98	9
1991	271	0.48	31.97	25.8	79.52	19.15	9
1991	272	0	31.61	24.95	80.14	17.75	9
1991	273	0	31.97	25.03	78.63	16.78	9
1991	274	4.42	30.82	25.15	81.45	17.06	9
1991	275	1.45	31.46	24.93	79.85	19.98	10
1991	276	5.66	29.59	26.06	87.93	11.27	10
1991	277	10.61	29.06	25.88	91.16	11.59	10
1991	278	11.23	28.38	25.08	90.93	5.47	10
1991	279	9.91	28.78	24.92	88.9	9.32	10
1991	280	16.64	28.97	24.98	86.46	14.8	10
1991	281	0.11	30.14	24.8	84.58	15.01	10
1991	282	0.05	29.31	25.47	85.33	13	10
1991	283	0.23	28.79	25.34	88.36	13.46	10
1991	284	3.15	28.58	23.54	90.3	15.73	10
1991	285	4.1	27.7	24.83	91.32	13.5	10
1991	286	25.05	27.29	24.14	92.31	5.94	10
1991	287	19.63	27.1	23.22	92.51	3.82	10
1991	288	1.44	28.74	22.53	83.76	11.63	10
1991	289	0.27	30.03	23.14	75.38	17.53	10
1991	290	0	29.66	23.09	74.11	18.65	10
1991	291	0	30.26	21.46	73.11	20.34	10
1991	292	0	29.46	20.09	66.54	20.05	10
1991	293	2.08	30.04	21.18	68.91	21.06	10
1991	294	0	29.77	21.31	65.07	18.97	10
1991	295	0	29.28	21.51	67	19.08	10
1991	296	0	28.75	19.14	69.23	19.84	10
1991	297	0	28.95	19.45	70.2	19.87	10
1991	298	0.09	29.15	21.05	72.79	18.07	10
1991	299	0.02	28.78	20.48	77.2	13.9	10
1991	300	0	29.24	21.08	78.66	13.82	10
1991	301	0	28.79	21.89	80.65	16.67	10
1991	302	0.03	28.62	22.52	81.33	11.59	10
1991	303	0.6	27.3	23.41	87.48	7.56	10
1991	304	38.8	27.94	22.61	85.45	9.54	10
1991	305	0.17	29.3	21.84	78.45	15.98	10
1991	306	0.14	28.45	23.08	80.29	13.39	11
1991	307	0.38	26.48	21.64	84.42	6.84	11
1991	308	2.5	24.17	20.24	84.53	12.64	11
1991	309	0.33	28.44	19.38	76.24	17.53	11
1991	310	0	28.1	18.66	60.46	17.5	11
1991	311	0	27.84	16.77	68.25	18.29	11
1991	312	0	27.64	16.39	66.5	17.86	11
1991	313	0	27.48	16.04	63.3	17.42	11
1991	314	0	27.86	15.8	66.76	17.39	11
1991	315	0	27.87	16.07	72.02	18.58	11
1991	316	0	27.86	16.71	71.7	17.5	11
1991	317	0	27.99	16.75	71.34	15.98	11
1991	318	0	27.27	16.19	70.25	15.12	11
1991	319	0	24.34	16.33	72.66	12.64	11
1991	320	0	25.74	17.4	68.96	9.36	11
1991	321	0.03	26.94	17.7	73.56	6.26	11
1991	322	0.19	26.81	17.88	73.21	10.69	11
1991	323	0	27.45	16.69	69.54	14.94	11
1991	324	0.07	26.37	14.19	65.1	15.77	11
1991	325	0	25.86	12.81	59.14	15.7	11
1991	326	0	25.05	11.98	59.89	16.45	11
1991	327	0	25.54	11.4	67.49	16.24	11
1991	328	0	25.58	12.52	69.73	15.8	11
1991	329	0	26.15	12.59	70.1	16.31	11
1991	330	0	26.01	14.45	65.2	14.8	11
1991	331	0	25.25	13.95	66.32	14.22	11
1991	332	0	25.38	14.92	65.95	14.08	11
1991	333	0	25.45	12.93	62.56	15.41	11
1991	334	0	25.99	13.04	57.52	15.84	11
1991	335	0	26.09	13.96	49.46	16.96	11
1991	336	0	25.94	13.13	56.21	16.49	12
1991	337	0	24.94	10.96	58.69	16.42	12
1991	338	0	23.97	9.72	60.45	15.7	12
1991	339	0	24.24	10.01	64.02	14.4	12
1991	340	0	24.63	10.8	63.37	14.76	12
1991	341	0	25.17	12.49	65.46	13.75	12
1991	342	0	25.34	13.05	64.7	14.58	12
1991	343	0	26.02	13.84	64.15	13.86	12
1991	344	1.07	26.31	14.79	67.66	12.06	12
1991	345	2.81	25.87	13.97	67.2	14.9	12
1991	346	0	26.86	14.6	67.59	16.31	12
1991	347	0	25.94	12.5	67.18	16.13	12
1991	348	0	26.4	12.35	67.27	13.39	12
1991	349	0	26.9	14.48	65.46	15.66	12
1991	350	0	26.53	12.93	63.24	15.23	12
1991	351	0	26.79	13	59.9	16.24	12
1991	352	0	24.89	13.62	58.81	12.42	12
1991	353	0	24.56	14.33	61.14	14.65	12
1991	354	0	25.67	14.51	57.97	16.92	12
1991	355	0	26.29	15	61.37	14.94	12
1991	356	0	26.82	15.51	66.72	13.93	12
1991	357	0	26.5	17.68	74.66	10.94	12
1991	358	15.59	26.03	19.37	81.71	8.5	12
1991	359	10.76	26.21	20.37	82.59	6.8	12
1991	360	7.87	24.99	16.78	80.96	8.82	12
1991	361	0.01	23.29	13.89	71.33	14.76	12
1991	362	2.41	22.31	12.17	61.24	15.12	12
1991	363	0	22.59	10.07	58.98	15.95	12
1991	364	0	22.29	10.23	53.72	15.12	12
1991	365	0.08	22.56	11.15	50.98	7.42	12
1992	1	0.99	22.03	13.08	65.03	10.26	1
1992	2	0.05	21.67	10.76	63.01	15.16	1
1992	3	0.04	21.12	8.27	55.81	14.9	1
1992	4	0	21.86	7.12	57.34	16.06	1
1992	5	0	22.71	7.63	57.37	14.8	1
1992	6	0	23.35	9.69	59.08	13.97	1
1992	7	0	23.75	10.42	56.03	14.15	1
1992	8	0	23.9	11	56.16	14.11	1
1992	9	0	24.77	11	55.69	15.55	1
1992	10	0	25.75	12.62	51.93	15.62	1
1992	11	0	25.51	13.21	60.7	16.27	1
1992	12	0	26.29	13.62	66.19	16.06	1
1992	13	0	23.78	9.57	55.12	17.06	1
1992	14	0	23.26	10.18	57.76	16.52	1
1992	15	0	24.18	10.03	57.69	16.2	1
1992	16	0	25.81	13.44	58.19	17.03	1
1992	17	0	26.85	13.16	62.85	16.52	1
1992	18	0	25.6	10.37	48.52	17.35	1
1992	19	0	25.3	10.7	50.27	17.1	1
1992	20	0	25.72	15.38	62.14	14.47	1
1992	21	0.02	25.97	16.31	74.17	12.56	1
1992	22	6.44	25.32	17.29	77.49	12.46	1
1992	23	1.71	26.52	16.93	68.15	13.57	1
1992	24	0	26.46	12.5	52.32	15.48	1
1992	25	0	26.54	12.35	50.85	17.53	1
1992	26	0	27.52	14.66	55.44	15.05	1
1992	27	0	27.99	15.66	55.18	16.16	1
1992	28	0	27.03	15.08	58.42	17.53	1
1992	29	0	28.07	14.34	62.6	15.59	1
1992	30	0	28.83	15.19	64.94	15.73	1
1992	31	0	28.49	15.4	71.12	16.56	1
1992	32	0.44	27.84	17.83	70.07	16.06	2
1992	33	8.46	28.03	19.36	72.17	16.42	2
1992	34	0.21	27.7	15.67	60.41	17.5	2
1992	35	0	27.76	13.43	47.64	18.43	2
1992	36	0	28.19	15.23	61.15	16.2	2
1992	37	0.23	28.57	16.66	62.56	14.4	2
1992	38	0.07	28.75	17.82	67.01	13.32	2
1992	39	12.9	29.16	19.96	69.42	14.72	2
1992	40	5.09	28.63	17.04	63.71	13.46	2
1992	41	0	28.08	16.23	62.39	15.19	2
1992	42	0	27.6	14.9	52.15	17.21	2
1992	43	0	26.08	12.57	40.47	20.38	2
1992	44	0	26.92	12.16	42.92	19.91	2
1992	45	0	30.12	15.87	68.82	20.7	2
1992	46	0	29.76	14.11	50.64	18.65	2
1992	47	0	29.63	14.07	50.88	19.91	2
1992	48	0.72	29.31	17.36	77.39	16.56	2
1992	49	0.57	29.83	17.03	49.22	20.95	2
1992	50	0.14	28.89	12.97	39.89	21.1	2
1992	51	0	28.58	16.77	69.12	16.6	2
1992	52	0.61	29.71	20.44	74.98	15.19	2
1992	53	1.05	31	20.55	65.05	15.59	2
1992	54	7.64	29.38	19.85	68.62	17.5	2
1992	55	11.03	28.48	18.31	62.87	17.57	2
1992	56	2.31	29.04	14.9	47.88	21.06	2
1992	57	1.28	28.31	16.6	54.14	17.82	2
1992	58	0	28.53	16.49	56.79	20.56	2
1992	59	0	30.27	16.87	55.2	22.43	2
1992	60	0	31.54	18.08	56.65	18.43	2
1992	61	0	33	19.13	60.82	16.7	3
1992	62	0	32.89	17.23	45.88	17.93	3
1992	63	0	32.51	16.03	46.97	19.84	3
1992	64	0	32.54	16.92	49.65	21.67	3
1992	65	0	34.18	17.17	50.17	20.3	3
1992	66	0	34.8	17.88	56.81	19.8	3
1992	67	0	34.95	20.55	52.94	20.16	3
1992	68	0	33.92	18.34	45.73	20.88	3
1992	69	0	33.81	17.95	51.5	20.88	3
1992	70	0	33.49	19.01	57.65	20.45	3
1992	71	0	34.08	20.41	61.28	19.98	3
1992	72	0	34.59	20.74	63.73	18.97	3
1992	73	0	34.79	21.58	59.99	18.61	3
1992	74	0	36.86	20.93	52.18	22.5	3
1992	75	0	37.1	23.05	55.69	19.98	3
1992	76	0	35.41	19.46	40.62	22.39	3
1992	77	0	35.46	20.55	53.28	23.22	3
1992	78	0	36.29	20.78	56.66	19.19	3
1992	79	0	35.44	23.22	63.5	19.8	3
1992	80	0	35.32	23.3	65.82	20.34	3
1992	81	0	35.9	24.02	64.47	18.4	3
1992	82	0	36.52	23.85	61.76	19.84	3
1992	83	0	37.93	23.69	59.99	21.67	3
1992	84	0	39.48	24.39	53.72	21.56	3
1992	85	0	39.97	24.21	44.07	21.96	3
1992	86	0	39.99	23.36	44.64	25.52	3
1992	87	0	40.27	23.23	41.52	25.34	3
1992	88	0	41.13	23.19	40.08	22.82	3
1992	89	0	41.22	23.27	43.16	19.84	3
1992	90	0	40.99	24.3	43.94	18.11	3
1992	91	0	39.68	25.37	42.64	12.06	3
1992	92	0	37.88	24.33	36.46	23.72	4
1992	93	0.28	39.16	23.85	41.92	23.15	4
1992	94	0	40.24	23.94	40.92	22.79	4
1992	95	0	39.99	23.36	46.79	22.18	4
1992	96	0	40.45	24.83	49.22	21.85	4
1992	97	0	40.18	24.64	45.93	23.33	4
1992	98	0	41.06	24.67	48.04	23.26	4
1992	99	0	41.21	24.61	40.05	24.59	4
1992	100	0.01	40.75	24.37	48.06	25.06	4
1992	101	0	40.86	24.93	48.26	25.02	4
1992	102	0	42.57	25.51	45.91	21.85	4
1992	103	0	42.02	25.9	47.98	22.36	4
1992	104	0	39.95	26.91	54.68	22.18	4
1992	105	0	41.78	26.33	51.19	23.8	4
1992	106	0.05	40.61	27.18	51.65	24.52	4
1992	107	1	38.93	26.67	54.55	18.36	4
1992	108	0.65	41.16	26.1	46.97	25.6	4
1992	109	1.56	41.32	24.8	44.29	22.5	4
1992	110	0.07	42.15	25.79	49.06	26.35	4
1992	111	0	42.31	25.8	45.21	26.71	4
1992	112	0	42.95	25.64	46.08	26.75	4
1992	113	0	43.13	25.79	44.81	26.5	4
1992	114	0.01	42.14	26.88	45.69	8.28	4
1992	115	0.53	39.82	26.14	45.93	19.22	4
1992	116	0	40.32	25.59	45.7	24.84	4
1992	117	0	39.87	28.12	41.35	24.08	4
1992	118	0	37.59	26.75	49.92	20.95	4
1992	119	0.34	36.29	26.15	51.21	23.47	4
1992	120	0.81	37.78	26.13	52.99	21.28	4
1992	121	0.4	38.35	26.31	51.21	24.01	4
1992	122	0.03	39.71	26.23	52.14	25.2	5
1992	123	7.66	39.43	27.28	55.74	6.41	5
1992	124	12.13	35.98	25.85	66.5	20.3	5
1992	125	1.37	35.6	26.06	65.33	19.84	5
1992	126	5.97	34.92	25.45	66.6	14.8	5
1992	127	0.85	38.31	25.43	59.39	24.26	5
1992	128	0.55	40.02	25.9	51.92	26.78	5
1992	129	0.23	41.27	24.89	47.31	23.98	5
1992	130	0	39.89	25.42	56.65	23.69	5
1992	131	0	39.34	26.23	59.5	23	5
1992	132	0	38.44	26.73	59.62	21.96	5
1992	133	0.01	39.98	25.9	54.26	22.54	5
1992	134	0	39.37	26.13	54.87	24.37	5
1992	135	0.02	39.14	27.06	56.05	24.62	5
1992	136	0.27	37.96	27.08	61.32	20.95	5
1992	137	0.02	39.37	27.72	59.21	26.03	5
1992	138	1.17	37.71	27.42	61.45	20.3	5
1992	139	1.27	36.96	27.21	64.05	22.46	5
1992	140	0.01	37.29	26.41	63.18	20.99	5
1992	141	8.3	37.18	28.35	65.77	21.42	5
1992	142	25.2	34.34	26.74	73.83	21.6	5
1992	143	51.35	32.45	25.86	77.67	14.58	5
1992	144	65.25	29.91	24.37	81.15	24.88	5
1992	145	8.51	31.73	25.02	75.98	18.32	5
1992	146	1.19	31.89	25.46	76.59	12.28	5
1992	147	5.7	31.47	25.28	76.43	12.06	5
1992	148	16.96	31.77	25.3	78.42	13.36	5
1992	149	27.72	31.5	26.42	79.49	19.51	5
1992	150	3.49	33.48	25.92	75.53	23.76	5
1992	151	0.01	34.09	26.91	79.77	23.62	5
1992	152	0	36.82	26.54	70.92	20.38	5
1992	153	0.01	35.49	26.86	75.84	21.89	6
1992	154	0	33.81	26.91	79.84	23.26	6
1992	155	0	33.31	26.45	79.96	26.28	6
1992	156	0.02	35.04	25.99	75.56	25.74	6
1992	157	0	35.18	25.53	72.54	26.89	6
1992	158	0	33.91	25.49	77.6	26.64	6
1992	159	0	34.73	26.92	76.35	21.42	6
1992	160	6.75	33.19	26.66	77.06	18.07	6
1992	161	10.41	32.06	26.27	80.34	14.4	6
1992	162	4.53	32.99	26.92	78.46	22.39	6
1992	163	4.72	33.88	26.79	76.82	20.59	6
1992	164	0.01	33.02	27.2	78.13	21.28	6
1992	165	8.97	32.71	27.11	81.52	19.15	6
1992	166	9.01	32.84	27.04	80.13	15.77	6
1992	167	8.3	32.83	26.77	77.41	24.19	6
1992	168	1.74	33.14	26.79	75.15	17.35	6
1992	169	2.01	31.31	27.62	84.09	9.97	6
1992	170	24.82	31.24	27.67	83.37	14.51	6
1992	171	23.74	31.54	26.91	83.28	6.48	6
1992	172	37.73	30.34	26.7	85.8	17.24	6
1992	173	18.47	30.23	26.36	88.32	17.24	6
1992	174	7.18	30.9	26.79	86.66	18.04	6
1992	175	4.75	31.26	27.35	87.46	11.56	6
1992	176	26.52	30.01	27.61	91.35	16.06	6
1992	177	13.37	32.32	27.46	86.57	11.09	6
1992	178	9.41	31.81	26.98	85.54	17.03	6
1992	179	7.61	32.13	26.89	83.62	9.94	6
1992	180	3.77	29.95	26.79	87.03	9.29	6
1992	181	14.96	33.55	26.52	81.6	14.36	6
1992	182	11.07	31.45	27.41	88.71	19.58	6
1992	183	3.69	32.51	27.19	85.89	19.66	7
1992	184	3.12	32.52	27.22	85.27	19.3	7
1992	185	2.41	30.71	27.13	87.68	15.52	7
1992	186	1.25	30.72	26.78	86.08	19.58	7
1992	187	1.37	32.16	26.77	82.76	20.95	7
1992	188	0.93	30.88	26.65	86.46	8.24	7
1992	189	19.52	30.34	26.85	88.75	4.28	7
1992	190	7.68	30.82	26.46	87.35	13.61	7
1992	191	9.75	30.21	26.74	87.17	9.18	7
1992	192	7.59	29.66	26.3	91.11	6.01	7
1992	193	24.54	29.49	26.95	89.86	6.26	7
1992	194	27.92	29.48	26.07	89.68	15.41	7
1992	195	5.04	30.61	25.97	86.7	19.48	7
1992	196	0.4	30.46	26.23	87.83	22	7
1992	197	0	30.44	26.71	87.29	16.99	7
1992	198	12.31	28.9	26.74	92.07	21.82	7
1992	199	10.59	28.93	26.49	92.37	11.59	7
1992	200	7.82	29.54	26.5	88.63	18.72	7
1992	201	12.24	29.69	26.26	91.21	5.29	7
1992	202	36.68	28.99	26.09	91.92	7.38	7
1992	203	38.62	30.07	25.89	88.75	12.28	7
1992	204	15.76	29.84	26.64	89.35	16.42	7
1992	205	9.24	30.77	26.67	89.44	18.43	7
1992	206	11.26	30.4	26.64	89.97	18.07	7
1992	207	14.28	30.22	26.43	91.66	18.58	7
1992	208	10.34	30.66	26.69	89.56	18.29	7
1992	209	18.4	29.44	26.65	88.15	7.85	7
1992	210	11.95	30.23	26.42	88.45	12.92	7
1992	211	3.49	30.85	26.11	87.25	19.22	7
1992	212	1.95	30.88	26.49	87.95	19.8	7
1992	213	11.28	30.93	26	87.47	8.5	7
1992	214	24.35	30.02	25.45	88.63	15.52	8
1992	215	15.47	30.26	26.32	90.46	14.62	8
1992	216	7.61	29.5	26.46	90.55	16.6	8
1992	217	8.06	29.62	25.63	90.04	13.61	8
1992	218	2.44	30.2	25.18	87.74	14.58	8
1992	219	1.56	28.83	26.17	91.09	4.93	8
1992	220	62.23	27.97	25.58	91.37	7.7	8
1992	221	52.38	28.8	25.33	89.47	13.64	8
1992	222	13.2	29.41	25.68	89.4	14.54	8
1992	223	4.44	31.55	25.82	87.19	16.09	8
1992	224	0.92	30.73	26.34	88.59	19.04	8
1992	225	1.49	29.67	25.99	89.47	21.2	8
1992	226	16.43	30.07	25.93	89.34	17.78	8
1992	227	6.07	31	26.52	88.96	17.57	8
1992	228	9.04	30.27	26.43	89.46	13.86	8
1992	229	6.27	30.52	26.33	88.43	18.32	8
1992	230	6.48	29.93	26.56	90.54	14.9	8
1992	231	11.28	30.66	26.31	88.64	11.38	8
1992	232	9.31	30.73	26.14	88.95	14	8
1992	233	1.14	30.8	26.36	86.47	17.35	8
1992	234	1.09	30.53	25.96	83.99	14.4	8
1992	235	1.23	30.7	25.36	85.64	13.64	8
1992	236	0.01	31.2	25.38	85.47	15.55	8
1992	237	0.04	31.36	26.19	88.04	18	8
1992	238	1.12	30.41	26.97	90.2	14.51	8
1992	239	1.96	30.1	26.69	91.25	10.73	8
1992	240	5.23	30.04	26.25	90.34	5.04	8
1992	241	6.8	30.69	26.29	87.31	12.35	8
1992	242	3.82	31.07	25.99	85.02	16.49	8
1992	243	0.37	32.54	26.22	83.76	19.58	8
1992	244	0.03	31.48	26.37	87.37	16.42	8
1992	245	1.01	30.76	26.44	89.11	18.65	9
1992	246	5.66	30.92	26.13	88.38	8.6	9
1992	247	28.94	29.59	26.08	89.57	7.13	9
1992	248	30.48	30.36	26.01	88.81	16.99	9
1992	249	5.26	29.61	25.44	87.92	17.57	9
1992	250	0.77	30.49	24.81	87.75	15.34	9
1992	251	12.79	30.19	25.61	88.83	16.13	9
1992	252	9.07	29.94	26.48	91.04	14.69	9
1992	253	4.73	29.41	26.27	91.78	14.33	9
1992	254	5.64	29.46	25.85	89.78	11.48	9
1992	255	30.68	29.44	25.88	91.31	5.22	9
1992	256	12.09	28.93	25.64	89.8	7.85	9
1992	257	0.84	30.88	25.42	84.92	17.57	9
1992	258	0	30.96	24.65	81.93	19.08	9
1992	259	0.01	31.97	24.53	79.18	20.34	9
1992	260	0	31.74	25.23	79.55	16.06	9
1992	261	0	31.91	25.11	79.08	17.32	9
1992	262	0.48	30.57	25.16	81.02	18.72	9
1992	263	0.09	32.3	24.87	77.99	19.58	9
1992	264	0	31.92	24.41	79.28	18.14	9
1992	265	0	31.99	24.86	80.5	19.37	9
1992	266	0	32.78	23.89	79.05	18.14	9
1992	267	0	32.53	23.64	76.49	14.15	9
1992	268	3.06	29.4	25.16	86.9	13	9
1992	269	16.78	28.27	24.98	91.65	5.22	9
1992	270	24.87	29.32	25.67	90.08	6.3	9
1992	271	27.15	28.11	25.5	91.46	9.36	9
1992	272	11.85	29.06	25.61	90.82	14.9	9
1992	273	0.02	29.46	24.05	85.96	20.34	9
1992	274	0.05	31.33	24.18	80.97	17.82	9
1992	275	0.04	31.36	24.95	79.14	21.1	10
1992	276	0.14	31.57	24.74	77	17.86	10
1992	277	0.04	31.65	24.4	78.47	17.71	10
1992	278	3.37	31.25	24.53	79.67	17.78	10
1992	279	0.72	30.82	25.33	79.96	14.58	10
1992	280	0.12	30.73	25.2	80.33	10.91	10
1992	281	0.24	30.9	24.34	81.51	15.84	10
1992	282	0.26	30.38	24.74	83.99	13.57	10
1992	283	7.2	28.91	25.08	89.95	8.32	10
1992	284	8.09	30.81	25.33	83.77	12.6	10
1992	285	0.49	31.05	25.67	81.73	17.6	10
1992	286	0.04	30.24	24.78	84.18	16.06	10
1992	287	8.78	28.97	25.6	90.65	15.62	10
1992	288	3.56	30.07	25.99	89.37	14.47	10
1992	289	0.56	31.82	25.33	79.71	16.2	10
1992	290	0.02	30.85	25.19	77.8	16.56	10
1992	291	0.08	31.48	22.84	73.95	17.06	10
1992	292	0.04	30.68	22.81	73.77	15.88	10
1992	293	0.3	30.7	23.19	78.04	14.76	10
1992	294	30.8	27.53	23.92	91.58	10.04	10
1992	295	18.31	28.91	23.81	86.86	6.12	10
1992	296	7.58	29.64	21.91	78.01	17.32	10
1992	297	0.76	30.23	17.61	69.99	17.93	10
1992	298	0	29.96	19.88	66.68	18.22	10
1992	299	0	30.25	19.6	62.95	18.32	10
1992	300	0	29.88	19.02	59.4	18.29	10
1992	301	0	29.24	17.94	62.37	18.43	10
1992	302	0	29.42	17.43	62.45	18.86	10
1992	303	0	30.34	18.28	70.66	14.83	10
1992	304	0	31.54	20	73.26	18.18	10
1992	305	0	32.16	21.23	70.67	19.15	10
1992	306	0	31.78	21.54	72.62	18.97	11
1992	307	0	30.74	21.51	74.79	19.08	11
1992	308	0	31.15	21.16	64.04	18.14	11
1992	309	0	30.14	18.85	58.28	18.76	11
1992	310	0	30.13	18.89	57.67	15.91	11
1992	311	0	29.48	19.17	57.38	14.33	11
1992	312	0.03	28.64	16.9	57.36	16.6	11
1992	313	0	28.81	15.62	56.72	17.1	11
1992	314	0	28.2	15.91	59.43	17.42	11
1992	315	0	29.22	15.64	54.1	16.45	11
1992	316	0	28.55	19.58	70.88	16.27	11
1992	317	0	28.32	19.28	79.91	17.46	11
1992	318	0.05	29.04	19.63	72.83	16.78	11
1992	319	0.01	29.42	19.1	67.65	16.27	11
1992	320	0	29.93	18.65	64.48	15.26	11
1992	321	0	29.99	17.99	59.42	13.9	11
1992	322	0	29.45	18.71	57.59	14.33	11
1992	323	0	28.14	18.73	59.03	6.48	11
1992	324	0.12	28.6	19.32	56.09	11.7	11
1992	325	0.08	28.34	18.42	62.81	10.04	11
1992	326	0.01	29.4	16.6	58.95	16.6	11
1992	327	0	29.53	16.38	54.43	15.73	11
1992	328	0	29.71	17.26	60.9	15.05	11
1992	329	0.63	25.55	20.41	76.27	5.94	11
1992	330	0.87	27.64	16.36	67.34	14.33	11
1992	331	0.11	27.99	14.88	58.24	15.77	11
1992	332	0	28.25	14.36	56.71	15.98	11
1992	333	0	28.46	14.3	54.07	15.12	11
1992	334	0	28.69	17.37	60.92	15.05	11
1992	335	0	27.2	18.28	69.88	11.84	11
1992	336	0.03	27.65	17.86	71.21	13.5	12
1992	337	0.02	27.22	16.88	69.31	11.63	12
1992	338	0	27.98	16.5	62.76	14.51	12
1992	339	0	28.06	15.88	59.65	15.34	12
1992	340	0.12	28.24	16.91	57.7	15.01	12
1992	341	0.01	27.36	14.21	53.2	15.77	12
1992	342	0	26.96	13.08	54.25	16.42	12
1992	343	0	26.82	12.48	51.89	15.62	12
1992	344	0	27.16	12.69	48.96	15.95	12
1992	345	0	27.21	14.24	51.2	15.3	12
1992	346	0	27.6	13.17	49.78	16.13	12
1992	347	0	27.01	11.73	47.64	14.83	12
1992	348	0	26.49	11.3	46.61	14.62	12
1992	349	0	27.16	11.18	42.93	15.44	12
1992	350	0	27.2	10.69	43.23	15.26	12
1992	351	0	26.37	9.82	43.31	16.16	12
1992	352	0	26.66	9.82	40.42	15.73	12
1992	353	0	26.59	11.01	43.69	14.62	12
1992	354	0	26.4	11.41	45.76	14.76	12
1992	355	0	26.55	11.21	42.57	14.11	12
1992	356	0	26.76	11.3	46.71	15.05	12
1992	357	0	27.32	11.67	44.02	14.36	12
1992	358	0	26.63	11.4	46.47	13.9	12
1992	359	0	27.61	11.21	46.28	15.88	12
1992	360	0	28.08	12.01	40.57	14.94	12
1992	361	0	27.2	14.13	56.53	15.26	12
1992	362	0	27.04	12.64	50.84	14.87	12
1992	363	0	27.06	11.63	45.35	15.16	12
1992	364	0	27.19	13.87	48.96	14.54	12
1992	365	0	27.38	13.41	53.4	13.14	12
1992	366	0	27.69	12.96	42.72	13.82	12
1993	1	0	27.6	12.4	42.75	13.97	1
1993	2	0	27.76	12.14	43.49	13.57	1
1993	3	0	28.91	15.02	52.65	14.44	1
1993	4	0	30.02	16.1	58.94	14.69	1
1993	5	0	28.96	15.98	52.28	13.97	1
1993	6	0	27.98	17.35	70.1	14.54	1
1993	7	0	28.48	17.09	76.06	12.28	1
1993	8	0.04	29.38	19.66	75.59	14.8	1
1993	9	0	29.39	18.72	75.15	11.95	1
1993	10	0.13	29.14	18.24	68.17	10.48	1
1993	11	0.02	28.3	16.3	60.24	10.84	1
1993	12	0.46	28.51	18.62	70.23	12.02	1
1993	13	0.03	28.56	17.45	57.04	15.05	1
1993	14	15.89	26.39	11.3	40.26	17.46	1
1993	15	0	26.89	12.54	37.53	17.21	1
1993	16	0	26.78	13.27	35.99	16.88	1
1993	17	0	27.95	13.5	44.3	17.21	1
1993	18	0	28.17	15.12	51.37	14.44	1
1993	19	0	26.63	10.08	38.52	18.14	1
1993	20	0	25.31	9.87	38.69	16.56	1
1993	21	0	25.49	10.48	35.53	17.42	1
1993	22	0	26.92	10.05	32.52	17.71	1
1993	23	0	26.08	10.37	35.74	18.14	1
1993	24	0	25.98	9.28	34.04	18.54	1
1993	25	0	26.04	8.35	35.77	19.04	1
1993	26	0	27.07	9.37	36.94	19.08	1
1993	27	0	27.07	9.68	31.24	17.71	1
1993	28	0	26.8	9.84	28.62	18.76	1
1993	29	0	28.45	11.54	34.41	16.13	1
1993	30	0	29.21	14.88	50.21	17.71	1
1993	31	0	29.15	17.03	58.45	16.63	1
1993	32	0.43	29.79	17.52	55.08	14.36	2
1993	33	0	28.99	14.89	43.95	18.43	2
1993	34	0	29.76	13.95	39.36	18.43	2
1993	35	0	30.18	14.1	35	18.76	2
1993	36	0	30.35	13.75	34.69	18.04	2
1993	37	0	30.73	13.55	37.23	17.78	2
1993	38	0	31.48	14.49	50.99	16.99	2
1993	39	0	31.42	16.82	59.17	16.81	2
1993	40	0	31.32	17.95	58.67	16.45	2
1993	41	0	30.79	17.83	50.34	18.5	2
1993	42	0	30.7	17.47	55.37	18.61	2
1993	43	0	31.81	18.14	57.66	17.03	2
1993	44	0	33.53	19.23	54.83	18.11	2
1993	45	0	35.16	18.01	44.86	20.88	2
1993	46	0	34.88	17.82	43.45	20.81	2
1993	47	0	35.82	18.86	53.63	20.81	2
1993	48	0	35.94	19.76	57.76	20.84	2
1993	49	0	34.35	22.39	68.22	20.23	2
1993	50	0.02	34.12	21.39	58.51	20.41	2
1993	51	0.25	33.63	21.2	51.05	20.41	2
1993	52	3.75	31.31	18.47	51.61	15.91	2
1993	53	10.84	27.78	15.08	27.84	19.62	2
1993	54	0.52	28.91	13.81	28.06	21.17	2
1993	55	0	29.97	16.8	49.03	19.76	2
1993	56	0	30.89	18.27	59.15	18.43	2
1993	57	0	32.5	18.22	63.55	18.61	2
1993	58	0	33.64	19.61	59	19.55	2
1993	59	0.1	32.32	18.49	46.94	14	2
1993	60	0.04	32.71	18.74	43.78	18.04	2
1993	61	0.01	33.39	17.93	44.49	20.63	3
1993	62	0.08	33.97	19.3	41.18	19.04	3
1993	63	0	33.84	19.04	38.75	19.91	3
1993	64	0	35.17	19.49	39.15	20.56	3
1993	65	0	34.78	19.24	35.46	19.48	3
1993	66	0	33.91	18.39	29.15	20.2	3
1993	67	0	34.05	17.12	24.5	20.48	3
1993	68	0	35.61	18.28	26.07	21.74	3
1993	69	0	35.86	18.66	32.21	20.16	3
1993	70	0	36.58	18.79	41.5	19.73	3
1993	71	0	36.33	20.33	49.74	18.72	3
1993	72	0	37.49	21.33	49.93	20.81	3
1993	73	0	38.77	22.48	45.17	20.95	3
1993	74	0	38.91	22.5	37.13	19.26	3
1993	75	0.03	38.06	22.93	38.33	21.67	3
1993	76	0	36.31	21.46	30.13	22.28	3
1993	77	0	35.81	17.99	22.03	23.54	3
1993	78	0	34.87	19.3	48.49	21.96	3
1993	79	0	35.53	22.22	55.99	18.54	3
1993	80	0.01	35.24	23.44	58.82	17.39	3
1993	81	0.01	32.91	23.56	68.97	17.35	3
1993	82	1.77	34.38	24.9	66.17	16.85	3
1993	83	20.97	34.21	24.87	72.46	17.35	3
1993	84	13.73	31.74	24.04	77.7	4.72	3
1993	85	11.52	31.81	24.48	77.32	17.78	3
1993	86	14.83	31.59	22.7	64.07	21.85	3
1993	87	0	32.7	17.79	42.13	25.13	3
1993	88	0	33.75	18.87	34.72	26.14	3
1993	89	0.01	34.37	17.38	35.3	25.99	3
1993	90	0	35.92	18.64	47.35	26.6	3
1993	91	0	35.63	21.02	60.92	20.45	3
1993	92	0.13	36.06	23.8	61.07	11.66	4
1993	93	0.02	37.21	24.26	55.98	22.79	4
1993	94	0	37.43	23.7	55.16	21.89	4
1993	95	0	38.64	22.08	48.82	21.46	4
1993	96	0.04	38.38	22.85	54.66	22.03	4
1993	97	0	38.99	24.8	54.56	21.38	4
1993	98	0.69	38.87	24.86	56.31	15.16	4
1993	99	13.92	35.25	23.79	63.61	21.82	4
1993	100	10.54	35.02	24.14	68.87	24.05	4
1993	101	0.03	34.26	24.74	69.72	20.77	4
1993	102	0.81	33.76	24.57	67.79	19.91	4
1993	103	9.22	33.02	23.93	68.22	13.93	4
1993	104	0.79	34.16	21.93	62.09	21.31	4
1993	105	0.76	34.89	24.54	64.65	23	4
1993	106	0.5	37.75	25.04	56.62	26.89	4
1993	107	1.1	38.28	24.72	56.97	26.14	4
1993	108	0.01	38.12	25.11	62.27	25.56	4
1993	109	0	38.33	25.24	61.27	22.28	4
1993	110	0	37.13	25.58	64	24.37	4
1993	111	0	37.38	25.02	62.03	21.46	4
1993	112	2.4	37.05	24.56	61.59	23.94	4
1993	113	3.34	35.71	25.5	68.96	19.01	4
1993	114	3.11	35.79	25.52	71.03	21.92	4
1993	115	2.32	37.61	26	65.97	25.06	4
1993	116	1.19	36.85	25.99	63.7	24.8	4
1993	117	0.07	37.34	25.82	63.94	21.92	4
1993	118	0	37.99	26.51	66.81	20.41	4
1993	119	5.93	37.93	26.23	65.96	18.32	4
1993	120	18.35	35.07	26.24	71.19	14.72	4
1993	121	10.38	36.53	26.46	69.94	18.76	4
1993	122	0.12	35.62	26.39	72.16	18.86	5
1993	123	0.23	36.1	26.97	70.94	21.02	5
1993	124	0.42	36.37	26.98	73.57	20.59	5
1993	125	0.08	38.38	27.08	69.35	21.06	5
1993	126	0.01	37.33	26.99	70.99	20.05	5
1993	127	0.01	35.85	26.43	73.06	17.35	5
1993	128	0.02	35.84	26.3	71.92	21.02	5
1993	129	0.18	36.78	26.35	67.85	22.5	5
1993	130	9.82	35.11	26.17	71.25	23.08	5
1993	131	12.39	36.02	26.24	72.05	14.87	5
1993	132	1.27	38.44	26.04	66.05	21.28	5
1993	133	0.12	37.47	26.56	67.36	21.31	5
1993	134	1.38	36.77	26.42	67.35	23.08	5
1993	135	1.42	36.91	26.27	67.18	21.28	5
1993	136	0.49	35.49	26.43	70.07	19.22	5
1993	137	2.91	34.5	26.82	69.31	21.53	5
1993	138	5.56	32.97	26.75	74.33	16.85	5
1993	139	6.84	33.34	26.41	73.12	21.13	5
1993	140	9.88	33.79	26	75.05	23.4	5
1993	141	0.01	35.9	26.18	65.94	25.67	5
1993	142	0.02	37.02	26.08	61.83	22.39	5
1993	143	0.1	37.99	26.23	58.24	25.24	5
1993	144	0	37.22	26.47	63.91	22.68	5
1993	145	0.11	36.19	27.09	67.79	17.68	5
1993	146	16.02	34.08	26.62	74.35	19.94	5
1993	147	11.5	32.39	26.39	75.99	12.6	5
1993	148	19.05	33.14	26.11	75.31	14.9	5
1993	149	19.05	31.64	25.98	78.81	19.22	5
1993	150	6.05	34.16	26.27	73.84	20.12	5
1993	151	12.06	35.62	27.14	72.2	20.7	5
1993	152	7.78	36.09	27.92	74.36	18.11	5
1993	153	0.37	35.66	27.57	73.27	22.75	6
1993	154	0.63	34.42	27.59	74.83	20.66	6
1993	155	0.21	34.32	27.34	76.35	20.88	6
1993	156	1.61	35.34	26.96	73.72	21.71	6
1993	157	2.57	33.73	27.44	77.78	20.99	6
1993	158	4.62	34.27	27.39	75.79	17.5	6
1993	159	5.66	32.56	27.42	78.69	21.38	6
1993	160	0.17	34.17	27.19	75.91	19.33	6
1993	161	0.36	34.18	27.56	76.32	22.25	6
1993	162	3.31	31.63	27.55	80.8	19.04	6
1993	163	9.01	34.85	27.63	76.82	17.24	6
1993	164	0.03	32.43	27.6	78.4	14.76	6
1993	165	1.66	31.65	27.15	80.92	20.12	6
1993	166	4.85	33.51	26.51	77.82	14.9	6
1993	167	19.65	29.3	27.6	89.22	7.02	6
1993	168	20.06	30.72	26.61	86.84	8.03	6
1993	169	25.48	30.04	25.95	86.83	4.43	6
1993	170	18.88	31.47	26.86	83.76	15.08	6
1993	171	3.28	32.46	26.54	82.06	18.4	6
1993	172	0.42	31.27	26.94	83.92	13.54	6
1993	173	17.91	30.86	26.88	86.05	8.28	6
1993	174	31.33	31.46	26.8	85.82	10.69	6
1993	175	15.92	30.5	27.26	89.93	11.41	6
1993	176	7.94	30.81	27.22	87.06	10.19	6
1993	177	16.26	30.77	27.22	84.7	11.41	6
1993	178	6.66	32.52	26.88	84.15	14.8	6
1993	179	5.3	32.19	27.51	84.04	20.16	6
1993	180	2.37	31.76	27.47	86.75	18.94	6
1993	181	1.21	32.09	27.71	86.34	10.08	6
1993	182	8.27	31.24	27.59	88.01	14.62	6
1993	183	4.88	32.37	27.2	84.44	14.18	7
1993	184	1.44	31.14	27.1	85.37	19.91	7
1993	185	2.25	32.31	27.16	84.09	19.66	7
1993	186	1.02	32.74	27.11	82.71	17.68	7
1993	187	12.08	31.4	27.65	87.92	11.09	7
1993	188	13.15	30.1	27.01	88.66	13.72	7
1993	189	3.26	30	26.49	88.23	11.74	7
1993	190	3.18	30.77	26.5	86.47	6.91	7
1993	191	2.34	31.18	26.45	84.95	17.1	7
1993	192	11.03	31.67	26.9	86.12	14.9	7
1993	193	6.7	31.96	26.71	85.74	19.22	7
1993	194	1.2	32.07	26.51	83.69	18	7
1993	195	5.91	30.85	26.49	86.18	15.12	7
1993	196	14.02	29.32	26.54	90.77	2.34	7
1993	197	46.36	29.17	26.89	90.8	5.62	7
1993	198	37.51	30.19	26.86	88.74	13.93	7
1993	199	5.92	31.13	26.96	88.06	19.26	7
1993	200	0.21	30.96	26.79	87.56	20.81	7
1993	201	0.15	30.75	27.44	87.27	17.21	7
1993	202	0.26	30.72	27.14	86.88	11.92	7
1993	203	0.89	31.62	26.81	86.36	4.32	7
1993	204	14.9	29.45	26.93	91.41	5.94	7
1993	205	15.85	30.67	26.32	89.45	11.05	7
1993	206	9.27	30.43	26.34	89.61	15.95	7
1993	207	1.54	31.59	25.66	85.42	15.8	7
1993	208	2.56	31.74	25.98	85.02	17.28	7
1993	209	4.23	31.06	26.52	87.08	17.24	7
1993	210	7.97	30.92	26.08	87	20.09	7
1993	211	4.19	31.73	26.41	86.21	19.3	7
1993	212	1.4	32.54	26.56	86.12	16.27	7
1993	213	3.73	32.01	27.02	86.98	17.06	7
1993	214	2.76	30.74	27.24	88.69	13.5	8
1993	215	15.45	30.21	27.38	89.32	14.04	8
1993	216	22.3	29.85	27.23	89.72	5.26	8
1993	217	18.41	29.18	26.92	90.1	9.25	8
1993	218	20.82	29.57	26.39	88.61	12.96	8
1993	219	1.37	31.5	26.18	84.44	21.42	8
1993	220	0.04	31.48	26.71	86.22	15.62	8
1993	221	17.54	29.81	27.36	92.87	7.52	8
1993	222	34.56	29.63	26.73	92.59	11.52	8
1993	223	25.69	32.09	26.2	85.55	14.4	8
1993	224	64.46	31.33	26.09	88.62	5.11	8
1993	225	18.61	30.67	26.36	90.17	12.2	8
1993	226	5.73	30.47	26.87	89.72	16.2	8
1993	227	4.54	30.47	26.87	90.52	16.67	8
1993	228	2.16	31.58	26.26	87.65	15.8	8
1993	229	7.74	31.61	26.19	87.8	18.07	8
1993	230	6.14	31.14	26.77	90.59	13.25	8
1993	231	19.28	29.9	26.48	90.1	13.14	8
1993	232	11.82	30.42	26.86	89.35	8.35	8
1993	233	3.38	31.01	27.03	88.71	8.21	8
1993	234	2.88	31.27	27	88.74	7.16	8
1993	235	5.02	31.18	26.68	87.69	4.57	8
1993	236	3.6	30.61	26.44	88.25	13.68	8
1993	237	3.25	31.18	26.19	86.36	9.14	8
1993	238	4.95	29.6	26.47	90.66	13.39	8
1993	239	19.71	28.58	26.26	91.3	4.79	8
1993	240	5.83	30.49	25.73	86.99	20.23	8
1993	241	0.02	30.89	25.71	85.81	17.75	8
1993	242	0.32	29.64	26.41	88.22	11.59	8
1993	243	1.12	29.2	25.81	90.17	9.4	8
1993	244	14.21	28.24	25.64	92.42	7.6	8
1993	245	26.84	29.13	25.68	91.28	6.8	9
1993	246	20.87	28.28	26.15	93.46	4.79	9
1993	247	18.29	28	26.04	91.91	14.9	9
1993	248	7.14	28.65	25.86	90.83	15.98	9
1993	249	3.31	30.01	25.97	90.28	10.51	9
1993	250	14.99	30.04	25.5	90.22	10.44	9
1993	251	16.58	29.35	26.32	91.88	6.41	9
1993	252	9.69	29.37	26.23	90.02	7.6	9
1993	253	1.74	30.98	25.86	83.64	18.11	9
1993	254	5.98	32.13	25.15	82.65	18.61	9
1993	255	3.84	29.16	25.75	90.57	5.22	9
1993	256	33.85	28.1	25.83	93.98	3.78	9
1993	257	59.78	28.96	25.82	89.58	4.5	9
1993	258	22.02	30.12	26.32	88.28	11.99	9
1993	259	7.6	29.81	26.05	89.47	11.02	9
1993	260	4.75	29.48	25.98	88.92	17.28	9
1993	261	1.27	31.39	25.9	84.06	18.61	9
1993	262	0	31.22	26.1	84.39	17.24	9
1993	263	24.89	29.45	26.02	88.94	14.65	9
1993	264	7.09	28.71	25.62	90.48	15.12	9
1993	265	4.31	28.61	25.84	91.78	6.37	9
1993	266	3.22	28.86	25.62	91.69	11.7	9
1993	267	7.4	28.46	25.76	91.43	12.02	9
1993	268	10.56	28.01	25.47	92.19	18.32	9
1993	269	6.01	27.92	25.7	92.72	14.04	9
1993	270	0.71	29.47	25.34	87.65	15.8	9
1993	271	5.59	29.7	25.77	88.72	17.46	9
1993	272	3.98	28.9	25.68	91.58	11.66	9
1993	273	6.25	30.31	25.09	86.02	16.16	9
1993	274	6.47	29.24	25.89	92.59	15.7	9
1993	275	6.22	28.2	26.14	93.73	9.94	10
1993	276	30.32	30.24	25.5	86.87	18.22	10
1993	277	5.97	32.18	25.35	79.59	17.24	10
1993	278	0.27	30.9	25.51	84.33	14.69	10
1993	279	1.38	30.02	25.95	87.65	17.03	10
1993	280	1.01	31.28	25.67	82.84	14.65	10
1993	281	1.1	30.82	25.44	84.8	15.59	10
1993	282	0.99	30.67	25.48	85.82	12.64	10
1993	283	0.17	31.2	25.61	83.17	12.89	10
1993	284	1.74	30.67	25.31	85.42	15.62	10
1993	285	0.54	29.9	25.76	86.48	13.5	10
1993	286	1.37	29.59	25.48	86.32	15.01	10
1993	287	4.12	27.93	24.73	89.54	13.46	10
1993	288	6.46	28.68	24.25	88.01	7.88	10
1993	289	1.2	30.22	24.78	85.88	16.67	10
1993	290	0.43	29.54	24.71	87.57	18.9	10
1993	291	1.61	28.73	24.81	88.12	14.22	10
1993	292	2.33	29.33	24.92	86.76	17.46	10
1993	293	3.92	29.97	23.66	81.64	13.82	10
1993	294	17.22	29.72	22.21	79.58	17.64	10
1993	295	0.38	29.51	21.06	76.9	19.19	10
1993	296	0	29.12	17.86	67.62	20.74	10
1993	297	0	28.75	17.23	65.66	19.98	10
1993	298	0.02	28.98	18.47	64.8	18.9	10
1993	299	0	29.62	20.17	67.88	18.32	10
1993	300	0	29.87	22.99	71.62	17.64	10
1993	301	0	30.21	21.17	70.83	18.5	10
1993	302	0	29.27	17.05	73.56	19.15	10
1993	303	0	29.37	16.44	72.13	15.55	10
1993	304	0.08	28.97	20.51	82.8	9.29	10
1993	305	19.46	27.71	23.07	88.48	11.56	10
1993	306	7.92	28.64	23.14	84.44	14.51	11
1993	307	2.79	28.65	22.19	77.92	12.53	11
1993	308	0.94	28.83	20.61	76.79	14.87	11
1993	309	0.06	28.05	20.47	73.07	15.7	11
1993	310	0	28.76	20.08	72.62	16.27	11
1993	311	0	29.23	20.31	69.16	17.75	11
1993	312	0	29.39	19.97	70.16	16.88	11
1993	313	0	29.26	19.55	70.82	15.37	11
1993	314	0	29.18	19.88	69.84	16.99	11
1993	315	0	28.55	17.18	70.11	18	11
1993	316	0	27.45	15.94	66.37	16.67	11
1993	317	0	27.26	16.42	65.87	15.84	11
1993	318	0	27.41	17.24	68.83	17.03	11
1993	319	0	27.53	19.54	69.17	16.63	11
1993	320	0	27.86	18.87	72.2	15.23	11
1993	321	0	28.32	18.55	70.53	16.31	11
1993	322	0	28.22	16.93	68.25	15.98	11
1993	323	0	28.56	16.96	64.26	15.77	11
1993	324	0	28.85	18.98	63.8	15.62	11
1993	325	0	28.59	17.23	69.98	15.52	11
1993	326	0	27.22	15.84	74.09	15.59	11
1993	327	0	26.85	13.82	70.09	15.59	11
1993	328	0	26.25	12.98	66.57	16.38	11
1993	329	0	26.01	12.87	63.83	15.91	11
1993	330	0	25.97	11.52	60.79	15.95	11
1993	331	0	26.49	12.06	65.93	15.55	11
1993	332	0	27.23	14.35	71.22	15.19	11
1993	333	0	26.52	13.97	71.74	15.55	11
1993	334	0	27.26	14.72	69.96	15.48	11
1993	335	0	27.03	14.87	71.72	16.42	11
1993	336	0	27.17	15.85	69.68	14.54	12
1993	337	0	26.45	13.81	65.69	14.8	12
1993	338	0	26.07	12.13	62.52	13.39	12
1993	339	0	23.14	14.08	74.17	15.16	12
1993	340	0	27.55	12.85	69.38	16.16	12
1993	341	0	27.92	13.36	69.96	16.42	12
1993	342	0	27.01	13.51	67.12	15.16	12
1993	343	0	26	12.79	61.46	14.65	12
1993	344	0	26.24	11.26	61.23	16.16	12
1993	345	0	26.23	11.37	58.86	14.87	12
1993	346	0	25.31	11.05	53.38	14.62	12
1993	347	0	25.77	12.59	54.81	15.7	12
1993	348	0	25.03	11.27	57.73	15.34	12
1993	349	0	24.4	9.99	53.91	15.8	12
1993	350	0	24.68	8.93	54.28	15.08	12
1993	351	0	25.26	9.75	62.89	16.09	12
1993	352	0	25.23	9.55	60.57	15.48	12
1993	353	0	25.22	10.22	59.02	14.76	12
1993	354	0	24.95	10.69	55.07	13.28	12
1993	355	0	25.16	10.89	54.71	14.8	12
1993	356	0	25.09	9.51	53.07	15.26	12
1993	357	0	25.23	8.75	56.57	15.44	12
1993	358	0	25.86	9.67	59.29	15.8	12
1993	359	0	26.43	11.19	59.98	16.6	12
1993	360	0	26.28	10.41	61.38	16.38	12
1993	361	0	26.53	12.19	59.08	15.62	12
1993	362	0	26.71	12.86	58.89	14.4	12
1993	363	0	23.77	13.99	65.84	11.41	12
1993	364	0	24.19	12.95	64.56	12.46	12
1993	365	0	25.72	13	61.78	13.46	12
1994	1	0	27.01	13	58.97	15.34	1
1994	2	0	27.23	11.06	51.62	14.29	1
1994	3	0	27.89	12.97	51.26	13.43	1
1994	4	0	28.17	12.6	55.79	15.55	1
1994	5	0	27.88	14.33	53.07	15.37	1
1994	6	0	27.66	14.36	58.56	14.11	1
1994	7	0	27.21	13.28	54.52	14.44	1
1994	8	0	27.07	12.04	51.06	15.23	1
1994	9	0	27.62	11.89	54.04	15.66	1
1994	10	0	26.38	13.72	53.22	10.73	1
1994	11	0	26.8	12.08	54.59	13.72	1
1994	12	0	27.74	12.6	47.91	15.12	1
1994	13	0	28.66	12.86	46.37	14.11	1
1994	14	0	29	14	56.07	15.73	1
1994	15	0	28.78	15.98	65.82	11.38	1
1994	16	1.13	27.5	16.67	76.62	7.24	1
1994	17	0	25.66	12.08	52.6	18.11	1
1994	18	9.76	23.86	9.53	46.67	17.17	1
1994	19	0	25.13	8.96	45.75	15.59	1
1994	20	0	26.09	10.56	47.94	16.88	1
1994	21	0	27.45	11.22	46.87	17.32	1
1994	22	0	27.52	12.1	52.22	18	1
1994	23	0	26.56	9.56	43.81	18.36	1
1994	24	0	27.17	11.28	50.59	16.92	1
1994	25	0	27.2	11.68	49.15	17.1	1
1994	26	0	27.98	10.51	45.13	16.85	1
1994	27	0	28.18	11.18	46.13	17.6	1
1994	28	0	28.74	12.3	51.39	16.67	1
1994	29	0	29.98	14.08	54.01	17.17	1
1994	30	0	29.57	16.8	71.78	17.64	1
1994	31	0.51	28.48	18.59	74.94	8.96	1
1994	32	0.11	28.61	18.41	69.99	4.39	2
1994	33	12.34	24.59	14.8	82.54	4.57	2
1994	34	0.01	25.37	12.39	61.44	15.37	2
1994	35	4.13	26.61	12.81	51.64	16.67	2
1994	36	0	27.68	12.77	45.34	17.17	2
1994	37	0	29	13.96	47.93	17.46	2
1994	38	0	31.29	13.84	44.5	18.61	2
1994	39	0	31.02	15.36	46.48	17.14	2
1994	40	0.76	26.59	17.01	70.82	9.58	2
1994	41	1.04	27.34	15.19	59.02	17.32	2
1994	42	0.2	27.18	12.27	48.93	19.69	2
1994	43	0	27.54	13.94	51.95	15.98	2
1994	44	0.26	29.39	15.46	58.4	15.66	2
1994	45	0.02	29.42	14.05	44.12	17.57	2
1994	46	0.03	30.73	17.24	57.72	9.58	2
1994	47	16.82	28.07	17.48	68.4	15.05	2
1994	48	0.18	30.54	15.64	48.15	17.32	2
1994	49	0	30.35	15.83	52.39	16.34	2
1994	50	0	31.64	16.34	53.68	19.01	2
1994	51	0	31.55	16.96	55.58	19.01	2
1994	52	0	31.78	19.5	71.04	17.53	2
1994	53	0.01	31.21	22.04	65.45	14.33	2
1994	54	0	29.5	16.28	39.11	21.13	2
1994	55	0.06	28.72	13.15	35.18	22.75	2
1994	56	0	28.63	13.41	35.92	22.61	2
1994	57	0	29.88	13.91	33.59	22.75	2
1994	58	0	31.08	14.72	51.46	20.59	2
1994	59	0	32.5	17.6	63.46	21.6	2
1994	60	0	33.27	19.78	55.88	20.7	2
1994	61	0	32.6	17.56	44.67	17.24	3
1994	62	0	32.48	17.76	57.17	19.12	3
1994	63	0	32.92	19.75	62	17.39	3
1994	64	0	35.19	19.52	51.43	17.28	3
1994	65	0	36.4	19.91	47.45	19.94	3
1994	66	0	35.59	21.26	38.45	19.33	3
1994	67	0	36.02	19.94	33.6	21.38	3
1994	68	0	35.16	17.97	30.32	22.72	3
1994	69	0	34.85	16.44	26.37	21.56	3
1994	70	0	35.07	18.94	39.43	20.09	3
1994	71	0	35.42	18.62	49.66	17.96	3
1994	72	0	36.48	21.95	57.29	18.25	3
1994	73	0	36.87	22.65	58.94	20.88	3
1994	74	0	37.15	23.6	60.59	21.56	3
1994	75	0	38.23	23.48	55.16	18.04	3
1994	76	0	39.34	23.8	51.11	21.2	3
1994	77	0	38.74	22.99	47.32	20.77	3
1994	78	0	38.55	22.48	44.05	21.49	3
1994	79	0	38.44	22.6	54.58	19.73	3
1994	80	0	39.46	24.25	55.47	20.84	3
1994	81	0	38.76	25.05	56.73	17.32	3
1994	82	0	36.44	24.51	60.78	23.9	3
1994	83	0	36.97	23.79	56.79	22.97	3
1994	84	0	36.67	24.75	59.35	20.81	3
1994	85	0.05	35.23	24.97	66.95	16.81	3
1994	86	11.49	34.1	25.5	69.34	18.58	3
1994	87	2.44	35.15	23.87	65.82	20.74	3
1994	88	0.1	34.85	24.81	67.08	19.98	3
1994	89	4.55	35.3	25.18	67.27	19.44	3
1994	90	0.65	36.21	24.68	65.13	20.84	3
1994	91	0.02	37.26	25.86	67.17	17.17	3
1994	92	1	32.86	25.17	62.25	16.2	4
1994	93	16.5	32.52	23.24	70.92	18.76	4
1994	94	6.08	34.36	23.43	68.46	19.58	4
1994	95	0.25	35.31	23.16	65.32	20.02	4
1994	96	1.1	37.81	24.14	58.88	23.22	4
1994	97	0.42	37.54	25.07	60.27	20.92	4
1994	98	0	38.48	24.08	50.46	22.97	4
1994	99	0	38.52	25.02	43.88	21.24	4
1994	100	0	38.67	23.4	42.84	23.8	4
1994	101	0	39.38	24.8	45.32	22.57	4
1994	102	0	39.2	23.65	43.09	16.2	4
1994	103	0	39.27	24.04	45.47	24.98	4
1994	104	0	40.14	24.68	45.39	24.95	4
1994	105	0	39.85	24.91	47.07	24.48	4
1994	106	0.11	39.77	26.18	49.04	8.17	4
1994	107	0.15	38.94	27.07	49.38	18.32	4
1994	108	7.24	36.88	27.54	60.46	21.06	4
1994	109	3.34	36.17	26.16	66.68	21.35	4
1994	110	0.06	37.58	25.83	62.52	22.64	4
1994	111	0.07	35.78	26.13	68.78	20.74	4
1994	112	0.38	34.46	26.57	70.07	14.8	4
1994	113	20.19	33.6	26.07	73.74	18.83	4
1994	114	3.26	36.83	24.88	61.78	24.48	4
1994	115	0.02	36.27	25.81	67.86	22.72	4
1994	116	0.14	37.42	26.21	63.77	22.97	4
1994	117	0.14	38.39	26.02	59.72	25.6	4
1994	118	4.23	37.98	25.95	57.78	25.13	4
1994	119	0.55	37.18	26.1	58.73	23.58	4
1994	120	0.08	38.08	25.41	54.7	21.02	4
1994	121	0.28	38.48	26	52.25	20.95	4
1994	122	0	39.86	25.99	46.13	21.35	5
1994	123	0	40.13	26.76	49.1	22.64	5
1994	124	0.02	40	27.18	58.36	20.63	5
1994	125	0	39.93	28.65	57.42	21.53	5
1994	126	0	40.39	28.16	56.68	22.21	5
1994	127	0	41.59	28.6	52.58	20.23	5
1994	128	0.24	39.74	28.54	55.8	20.45	5
1994	129	6.17	38.15	28.11	55.94	20.2	5
1994	130	3.86	36.17	27.25	65.81	22.61	5
1994	131	0.85	38.89	27.19	57.22	22.5	5
1994	132	0.03	38.9	27.37	57.5	24.01	5
1994	133	0.09	38.73	28.12	60.11	23.87	5
1994	134	0.01	40.44	26.9	56.32	26.14	5
1994	135	0	39.78	27.45	59.51	14.8	5
1994	136	0.05	38.51	28.01	59.69	22.5	5
1994	137	0.08	38.61	27.31	59.83	22.46	5
1994	138	3.04	37.57	27.13	61.46	18.65	5
1994	139	18.54	35.8	27.08	67.2	22.39	5
1994	140	22.82	32.93	26.77	75.05	19.91	5
1994	141	7.85	33.86	26.53	73.91	19.73	5
1994	142	0.05	34.29	26.49	72.35	19.8	5
1994	143	0	33.64	27.44	73.84	15.3	5
1994	144	0.09	32.98	27.63	76.09	9.32	5
1994	145	2.88	32.42	27.26	77.39	10.01	5
1994	146	10.56	32.27	26.83	78.93	25.63	5
1994	147	6.67	34.76	27.05	75.16	23.98	5
1994	148	0.1	34.36	27.93	75.76	25.92	5
1994	149	0	35.15	27.99	74.35	24.8	5
1994	150	0	35.51	27.97	73.42	24.66	5
1994	151	0.02	35.49	27.6	74.2	22.86	5
1994	152	0.01	36.62	27.33	69.96	21.17	5
1994	153	0	36.48	27.88	70.64	20.81	6
1994	154	0	35.58	28.27	72.31	17.68	6
1994	155	0	34.49	27.69	74.67	20.84	6
1994	156	0.49	32.17	27.53	78.5	8.06	6
1994	157	21.75	33.57	27.5	79.11	22.03	6
1994	158	24.68	32.16	27.39	84.43	20.99	6
1994	159	0.78	32.53	28.01	83.18	12.35	6
1994	160	0.84	31.55	27.34	81.4	18.58	6
1994	161	1.08	32.31	27.03	78.09	13.97	6
1994	162	4.44	31.59	26.97	83.71	5.51	6
1994	163	8.51	30.94	27.4	86.6	7.88	6
1994	164	7.86	32.94	27.27	80.31	9.54	6
1994	165	11.08	31.99	27.32	83.55	10.69	6
1994	166	12.66	31.05	27.59	85.34	13.07	6
1994	167	4.98	33.27	26.98	77.23	10.3	6
1994	168	11.47	33.01	27.22	78.79	2.74	6
1994	169	14.22	30.91	27.28	84.75	14.11	6
1994	170	2.23	33.54	27.55	80.22	10.98	6
1994	171	1.19	32.67	27.69	81.12	8.75	6
1994	172	6.45	31.89	27.83	82.62	16.85	6
[truncated: 8,959 more rows]
